# Supplementary material for: Pharmacophore-based virtual screening, synthesis, biological evaluation, and molecular docking study of novel pyrrolizines bearing urea/thiourea moieties with potential cytotoxicity and CDK inhibitory activities
Source: PubMed Central journal article supplement — J Enzyme Inhib Med Chem. 2020 Oct 26;36(1):15–33. doi: 10.1080/14756366.2020.1837124 (PMC7594867; doi:10.1080/14756366.2020.1837124), 2020-10-26
Supplement: IENZ_A_1837124_SM9339.pdf [file IENZ_A_1837124_SM9339.pdf]

# Pharmacophore-based virtual screening, synthesis, biological evaluation, and molecular docking study of novel pyrrolizines bearing urea/thiourea moieties with potential anticancer and CDK inhibitory activities

Ahmed M. Shawky<sup>1</sup>, Nashwa A. Ibrahim<sup>2</sup>, Mohammed A. S. Abourehab<sup>3</sup>, Ashraf N. Abdalla<sup>4</sup>  
Ahmed M. Gouda<sup>2,5,\*</sup>

<sup>1</sup>Science and Technology Unit (STU), Umm Al-Qura University, Makkah 21955, Saudi Arabia

<sup>2</sup>Department of Pharmaceutical Chemistry, Faculty of Pharmacy, Umm Al-Qura University, Makkah 21955, Saudi Arabia

<sup>3</sup>Department of Pharmaceutics, Faculty of Pharmacy, Umm Al-Qura University, Makkah 21955, Saudi Arabia

<sup>4</sup>Department of Pharmacology and Toxicology, Faculty of Pharmacy, Umm Al-Qura University, Makkah 21955, Saudi Arabia

<sup>5</sup>Department of Medicinal Chemistry, Faculty of pharmacy, Beni-Suef University, Beni-Suef 62514, Egypt

---

**\*Correspondence: Ahmed M. Gouda:** Department of Medicinal Chemistry, Faculty of Pharmacy, Beni-Suef University, Beni-Suef 62514, Egypt.

**Scopus ID:** 26321547200

**ORCID:** 0000-0003-4527-8885

**Tel.:** (002)-01126897483

**Fax:** (002)-082-2162133

**E-mail address:** [ahmed.gouda@pharm.bsu.edu.eg](mailto:ahmed.gouda@pharm.bsu.edu.eg) or [amsaid@uqu.edu.sa](mailto:amsaid@uqu.edu.sa)

## Table of contents

| No | Item                                                                                | Figure No | Page No |
|----|-------------------------------------------------------------------------------------|-----------|---------|
| 1  | Chemical structures of the compound library                                         | S1-S42    | 3-44    |
| 2  | IR spectra of the new compounds <b>16-20a-c</b> .                                   | S43-S57   | 45-60   |
| 3  | <sup>1</sup> H-NMR, <sup>13</sup> C-NMR, and DEPT C <sup>135</sup> (representative) | S58-S122  | 61-126  |
| 4  | Mass spectra of the new compounds <b>16-20a-c</b> .                                 | S123-137  | 127-142 |
| 5  | Validation of the docking study into CDK-2 (2VTP)                                   | S138      | 143     |
| 6  | Table S1. Docking results into CDK-2 (2VTP)                                         | -         | 144     |
| 7  | 2/3D binding modes of the new compounds into CDK-2                                  | S139-150  | 145-148 |
| 8  | Validation of the docking study into CDK-6 (pdb: 2EUF)                              | S151      | 149     |
| 9  | Validation of the docking study into CDK-9 (pdb: 3TNH)                              | S152      | 149     |
| 10 | Table S2. DLS of the new compounds                                                  | -         | 150-151 |
| 11 | Table S3. physicochemical space and boiled-egg models                               | -         | 152-156 |
|    |                                                                                     |           |         |

## Chemical structures of the compound library

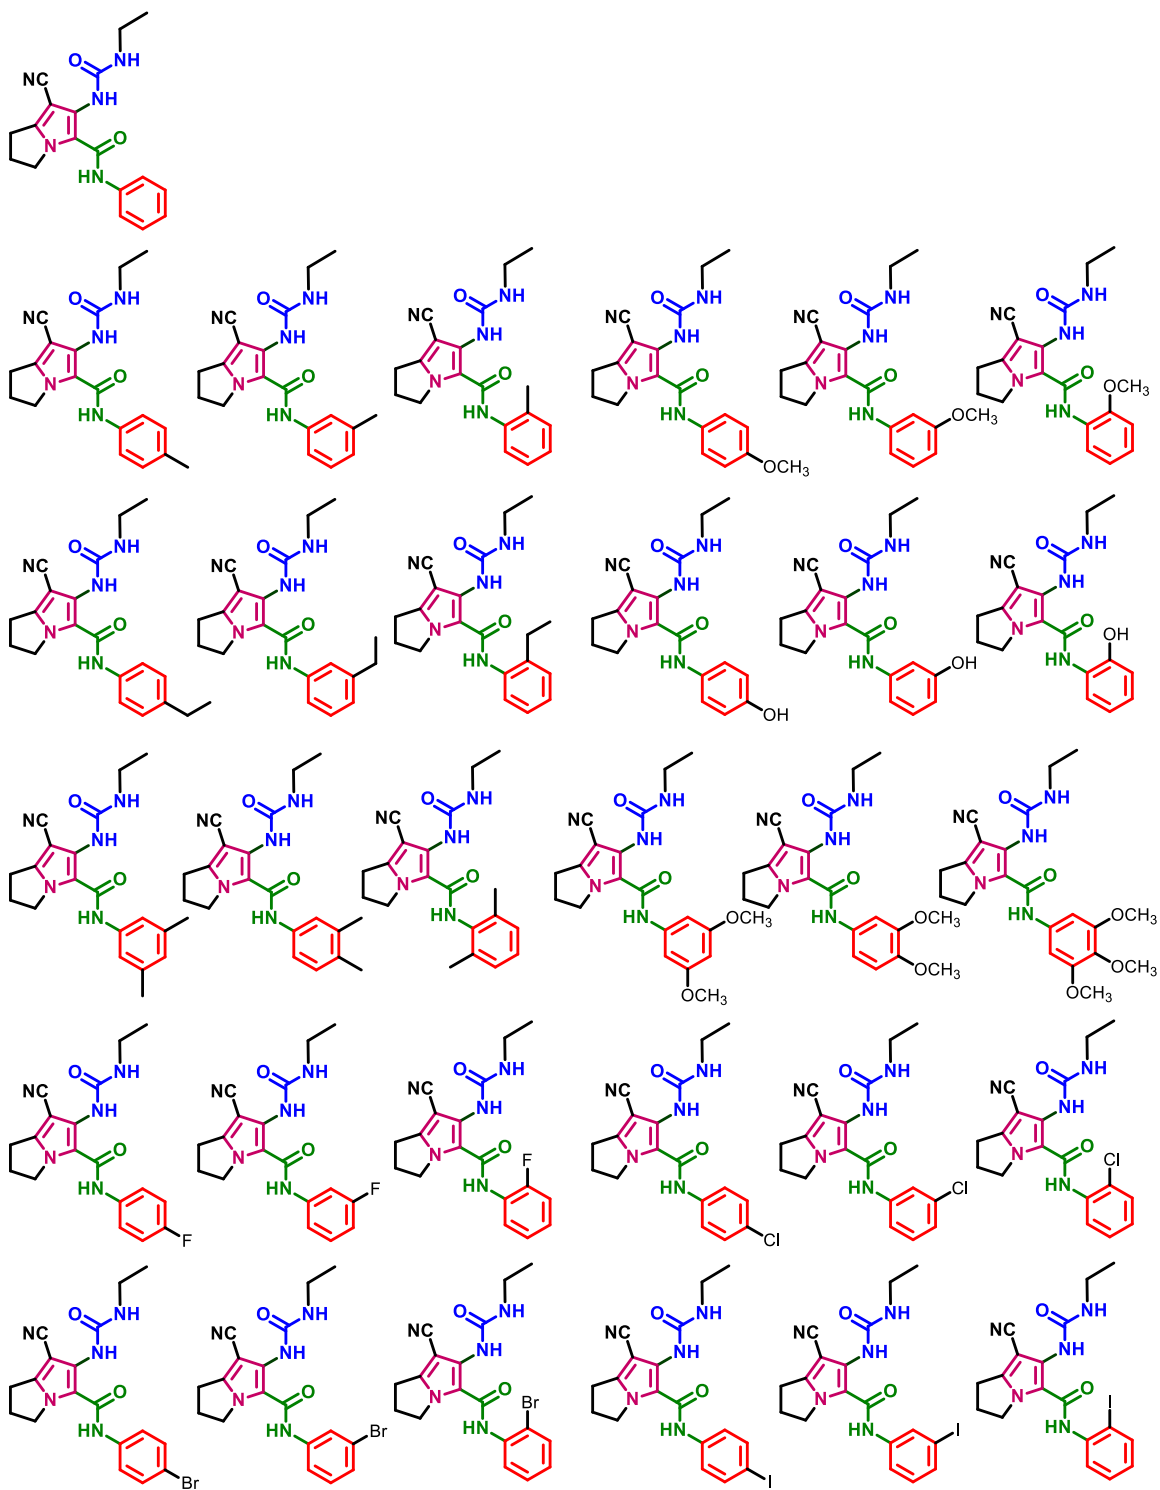

Figure S1. Chemical structure of compound 1-31 (Etiso)

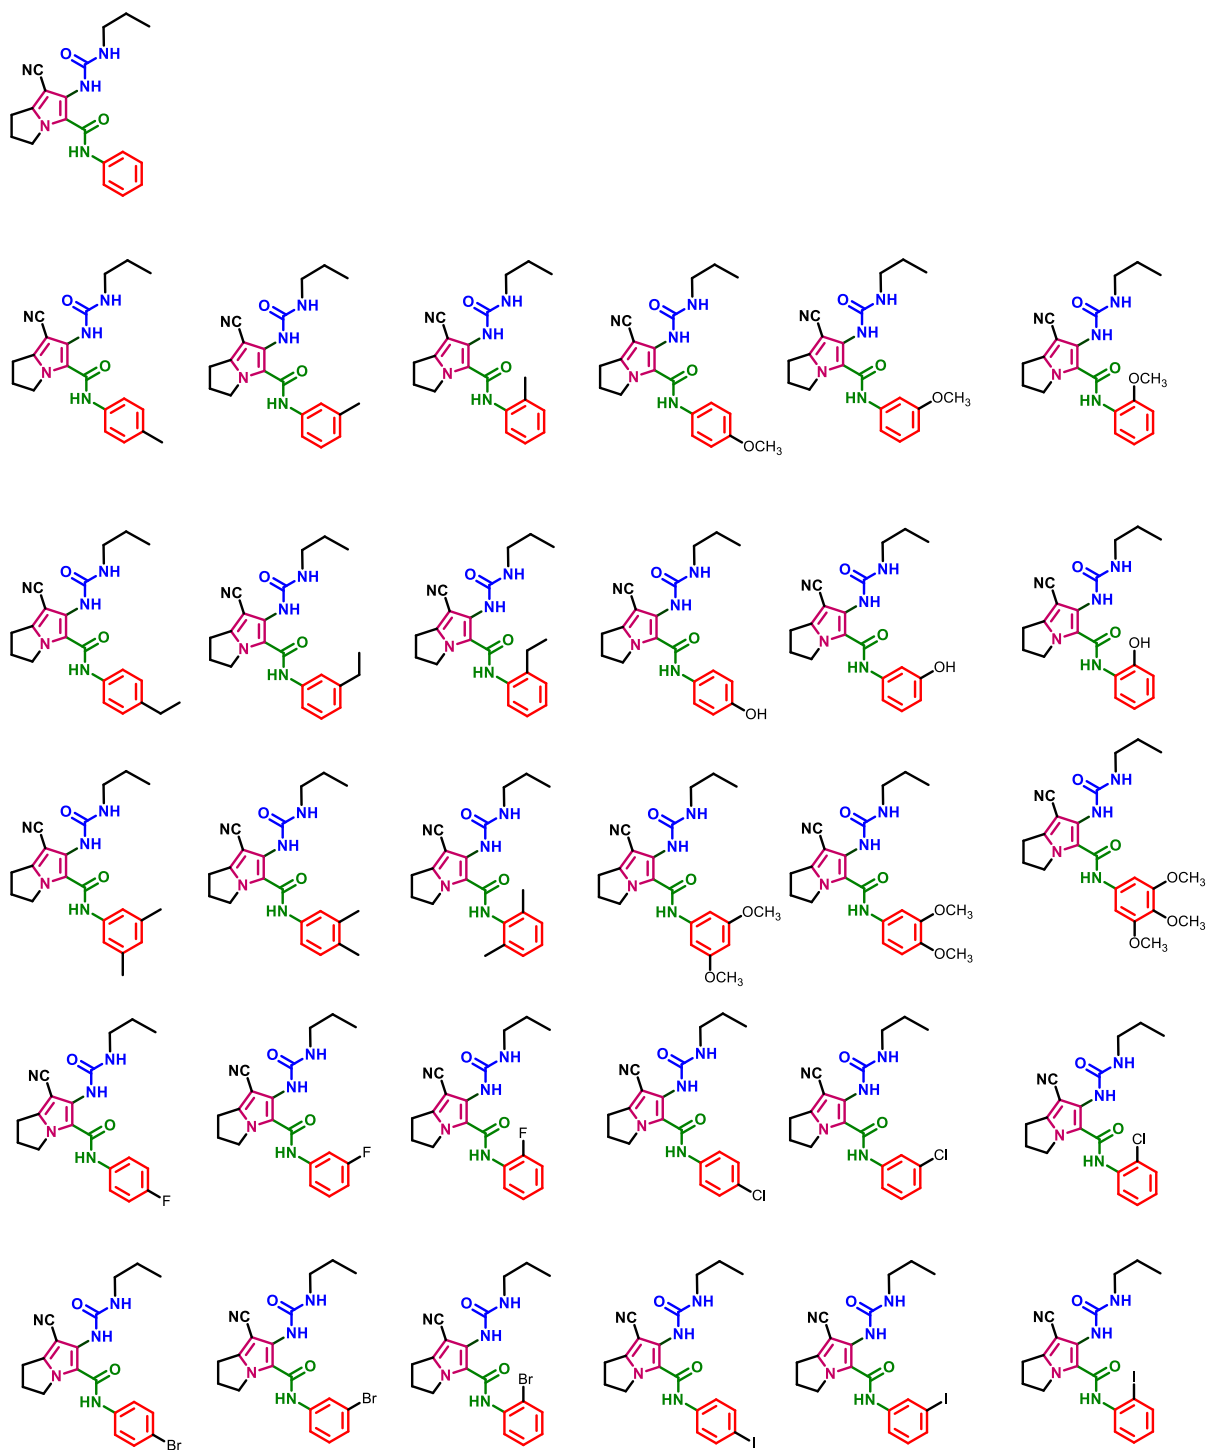

**Figure S2. Chemical structure of compound 32-62 (Propyliso)**



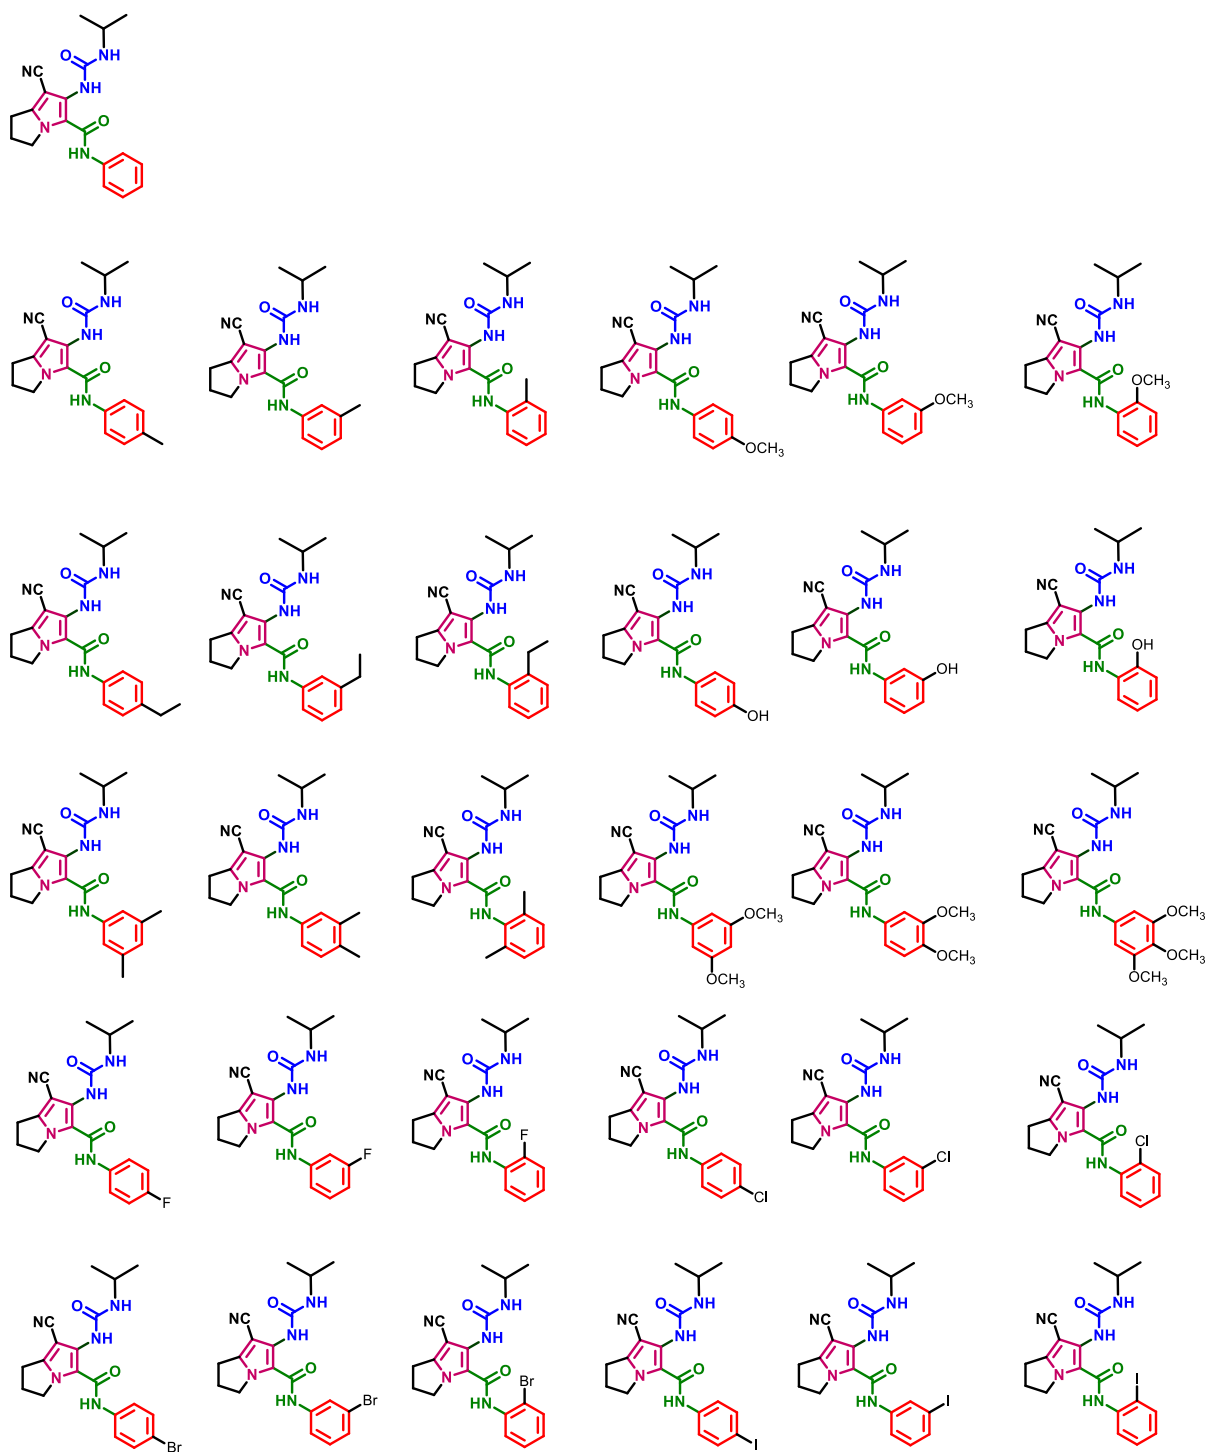

**Figure S3. Chemical structure of compound 63-93 (Isopropyliso)**

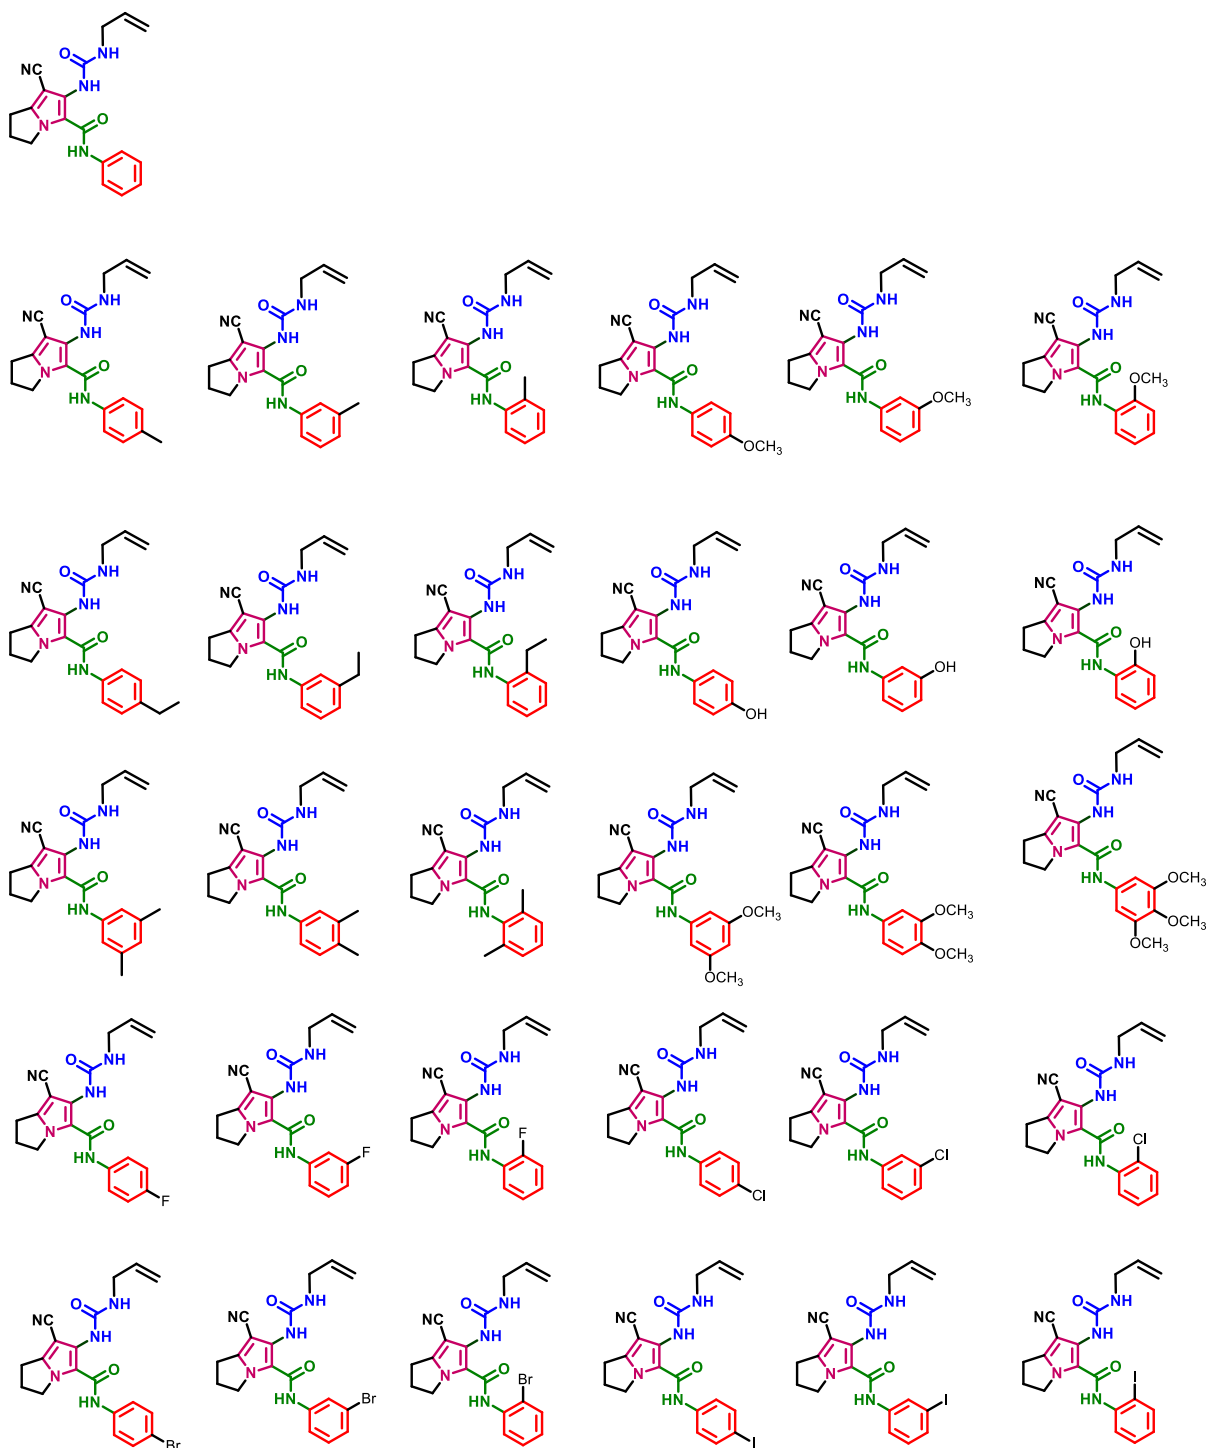

**Figure S4. Chemical structure of compound 94-124 (allyliso)**

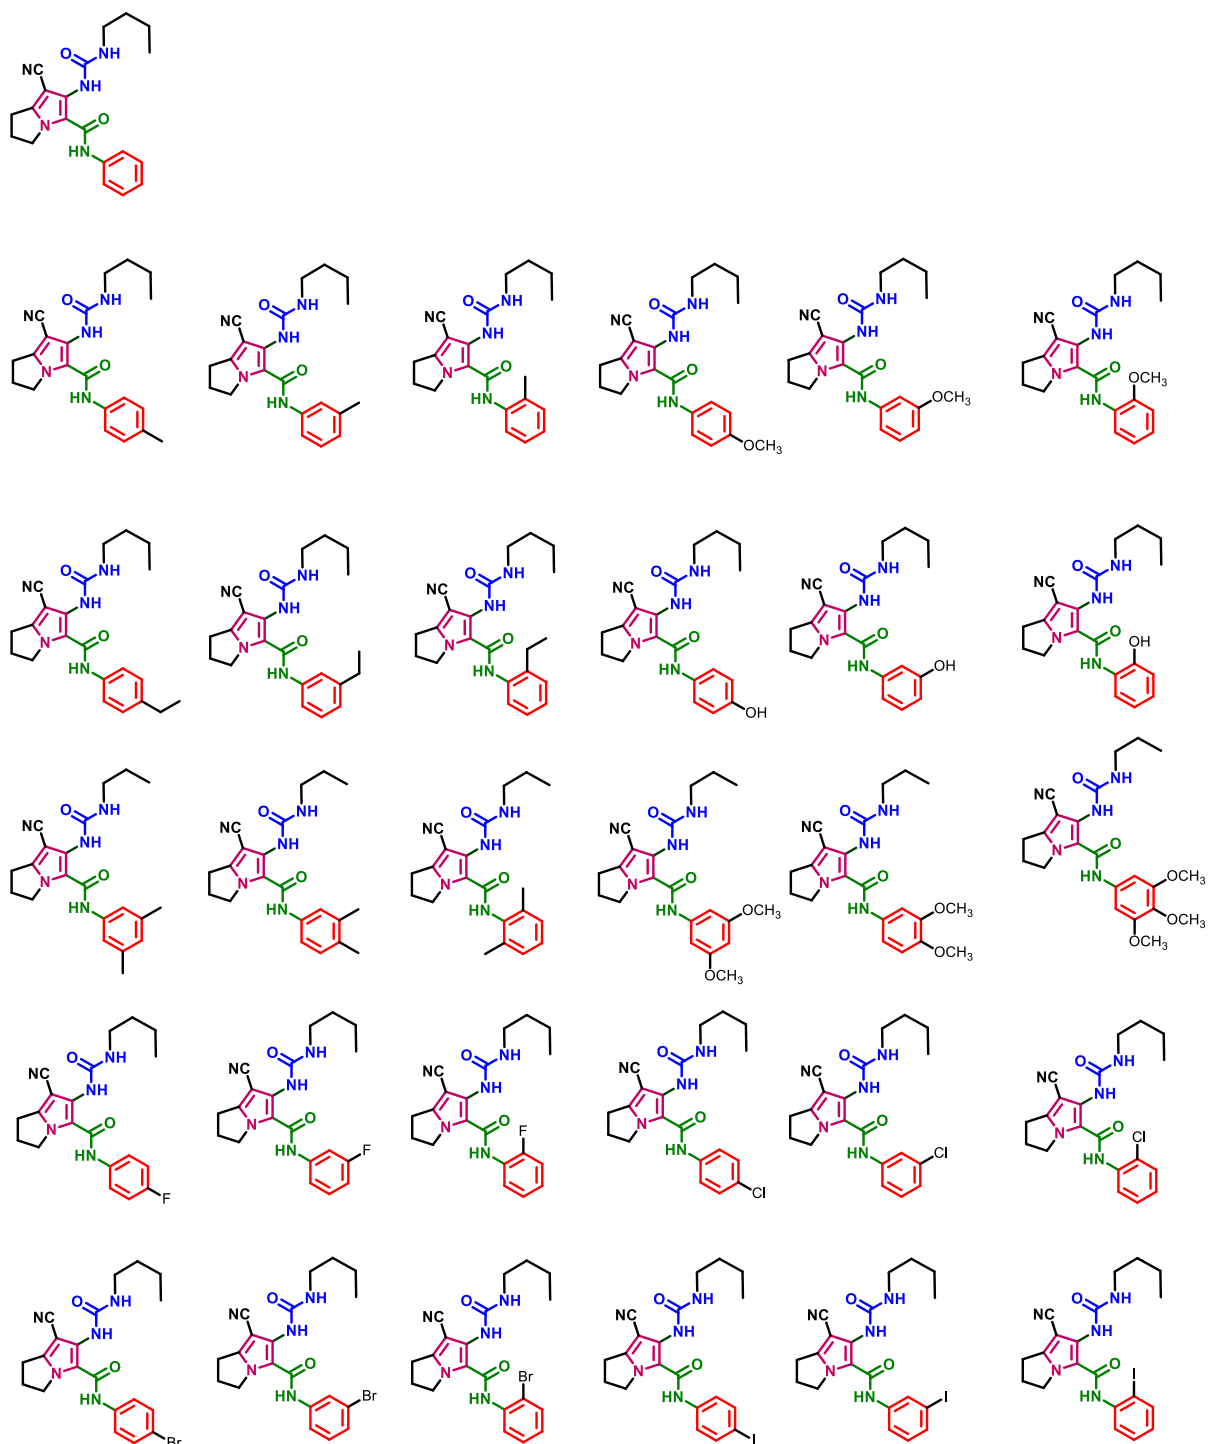

**Figure S5.** Chemical structure of compound 125-155 (butyliso)

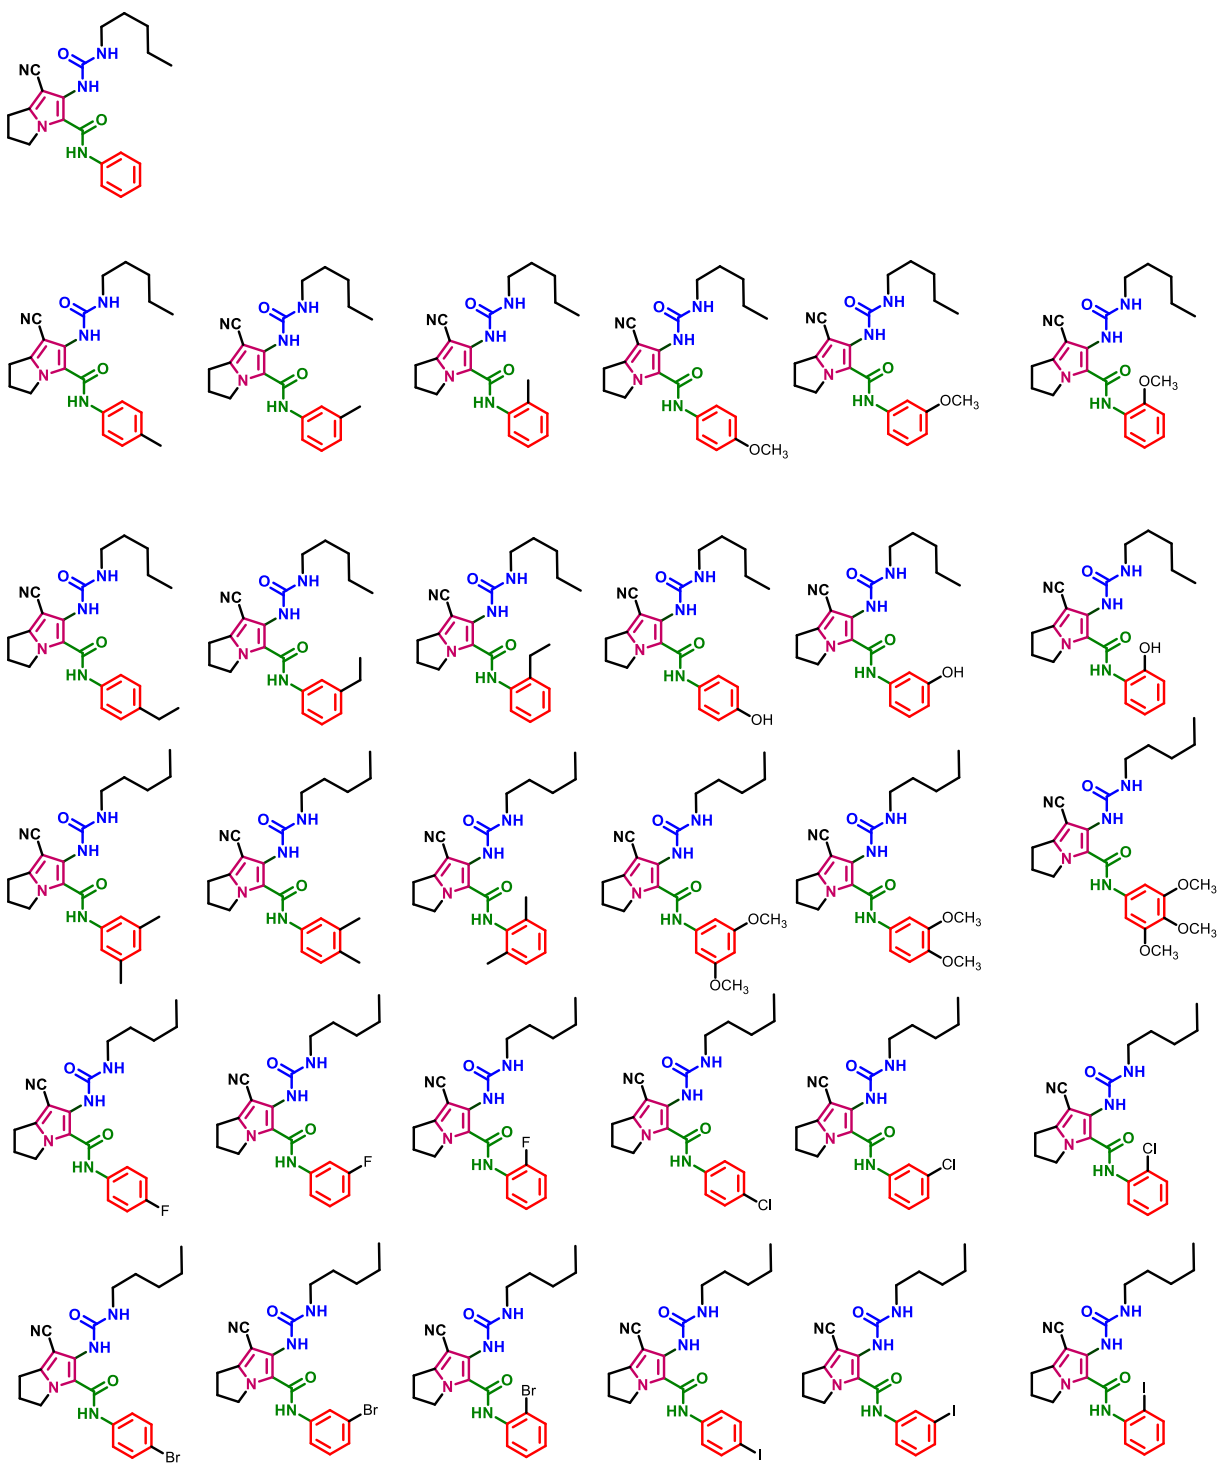

**Figure S6. Chemical structure of compound 156-186 (pentyliso)**

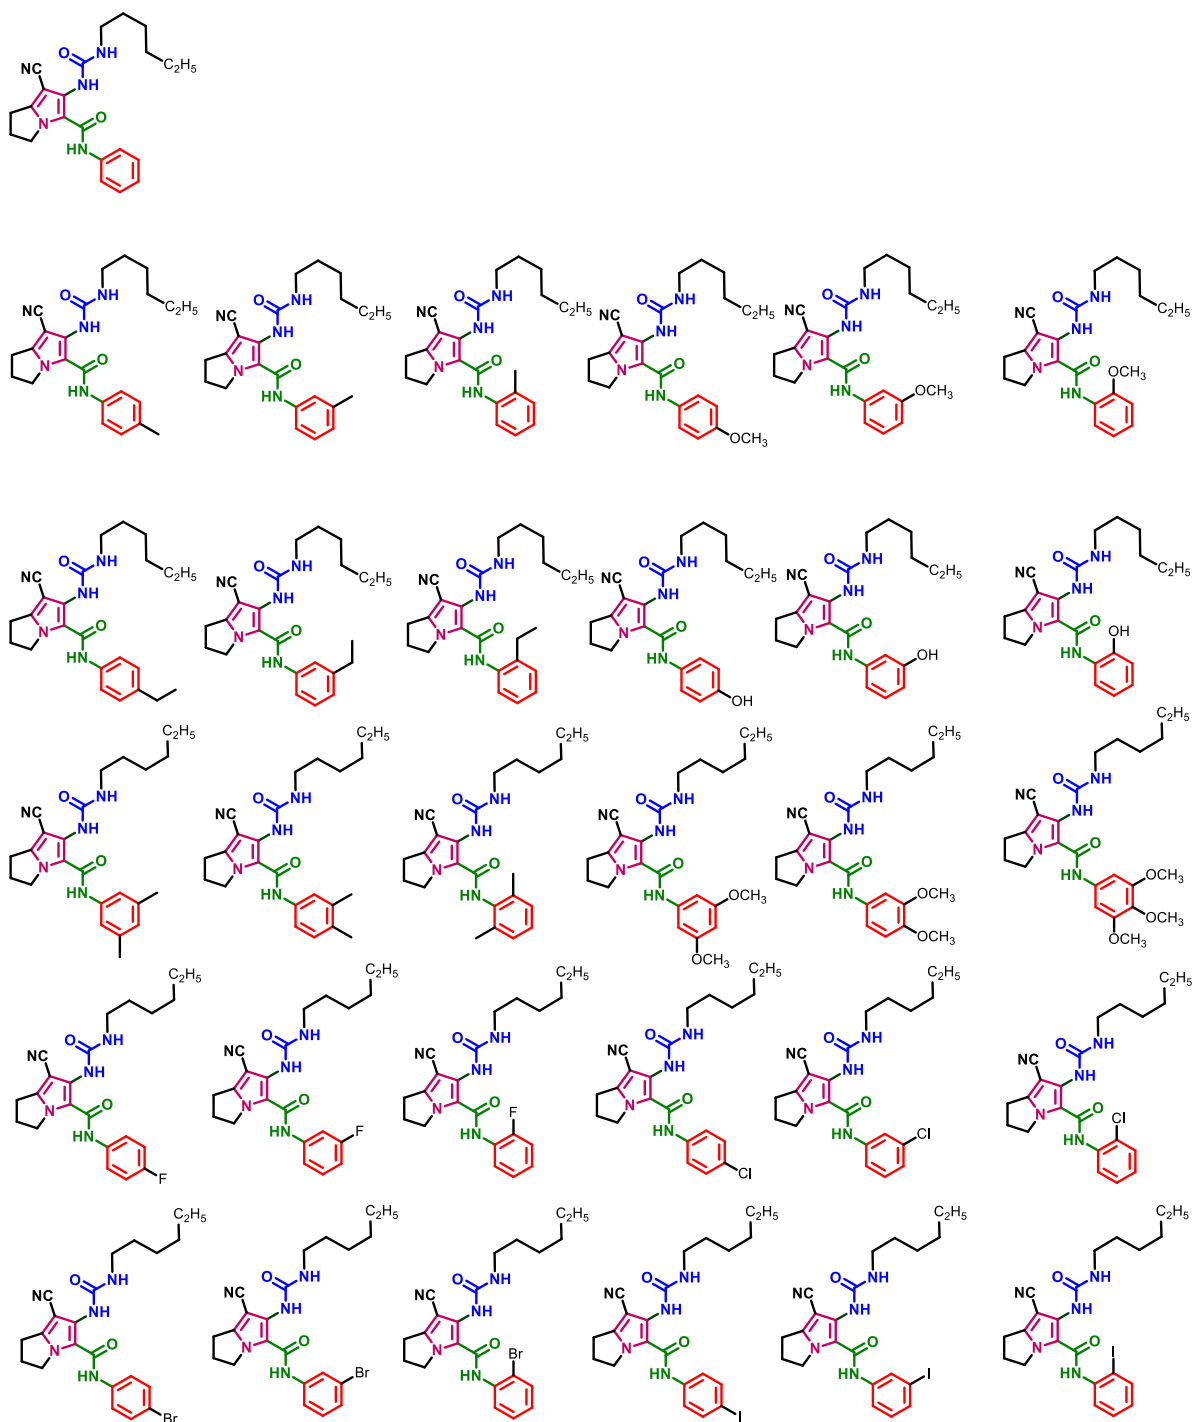

**Figure S7. Chemical structure of compound 187-217 (hexyliso)**

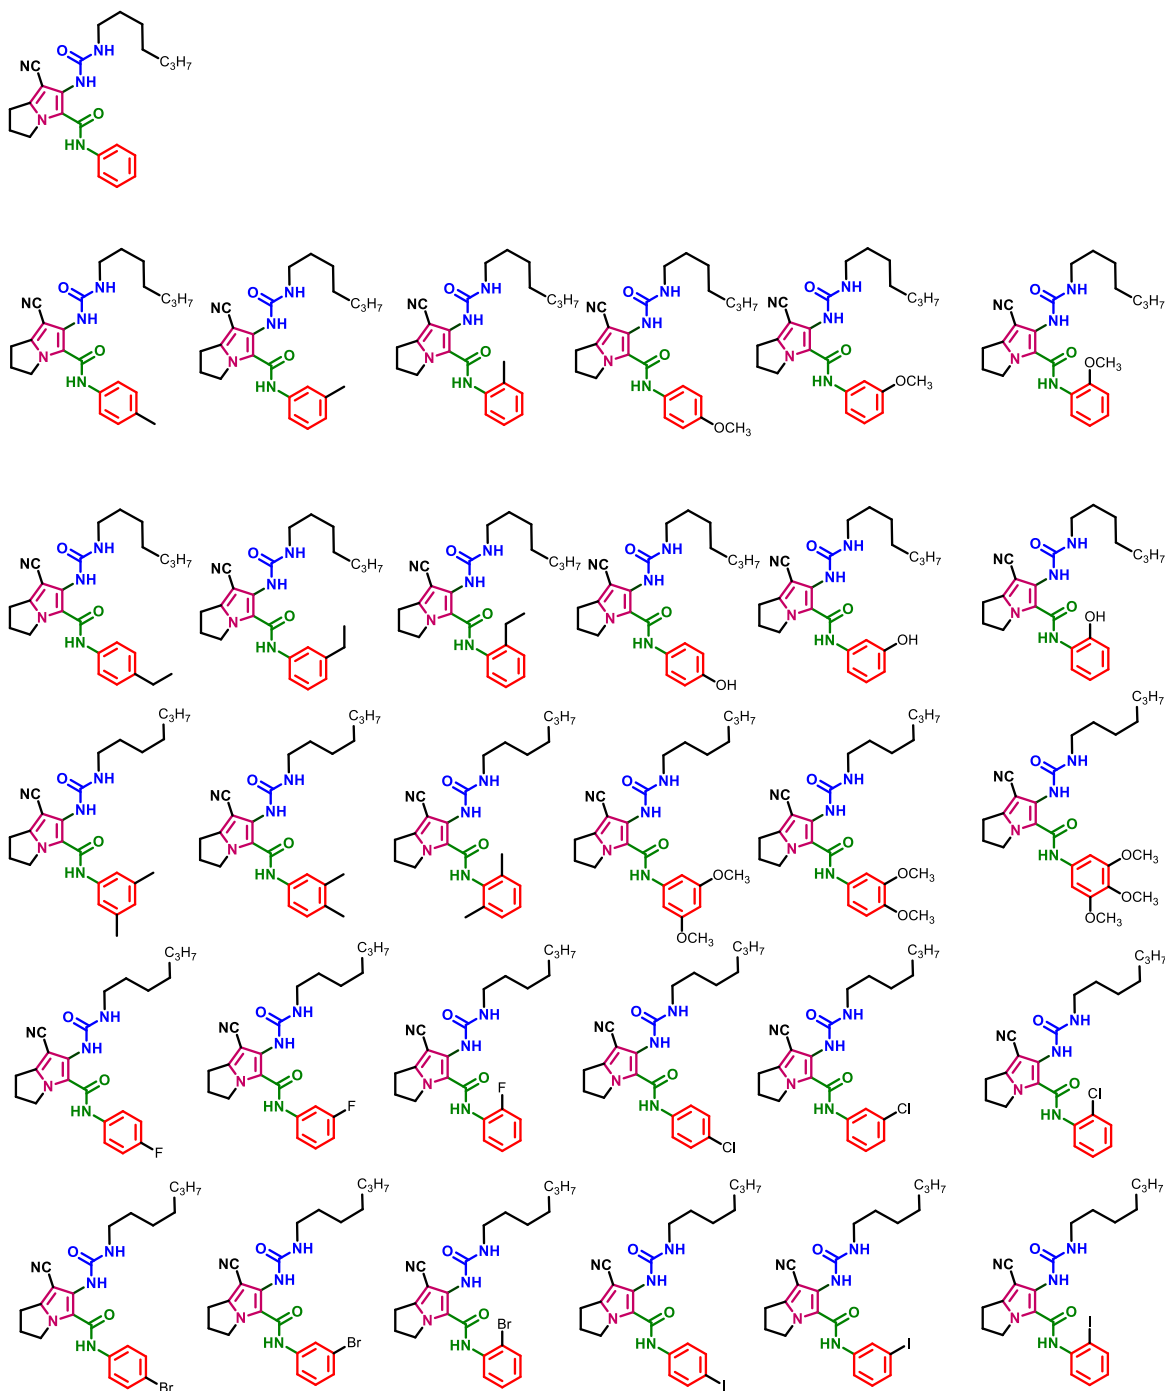

**Figure S8. Chemical structure of compound 218-248 (heptyliso)**

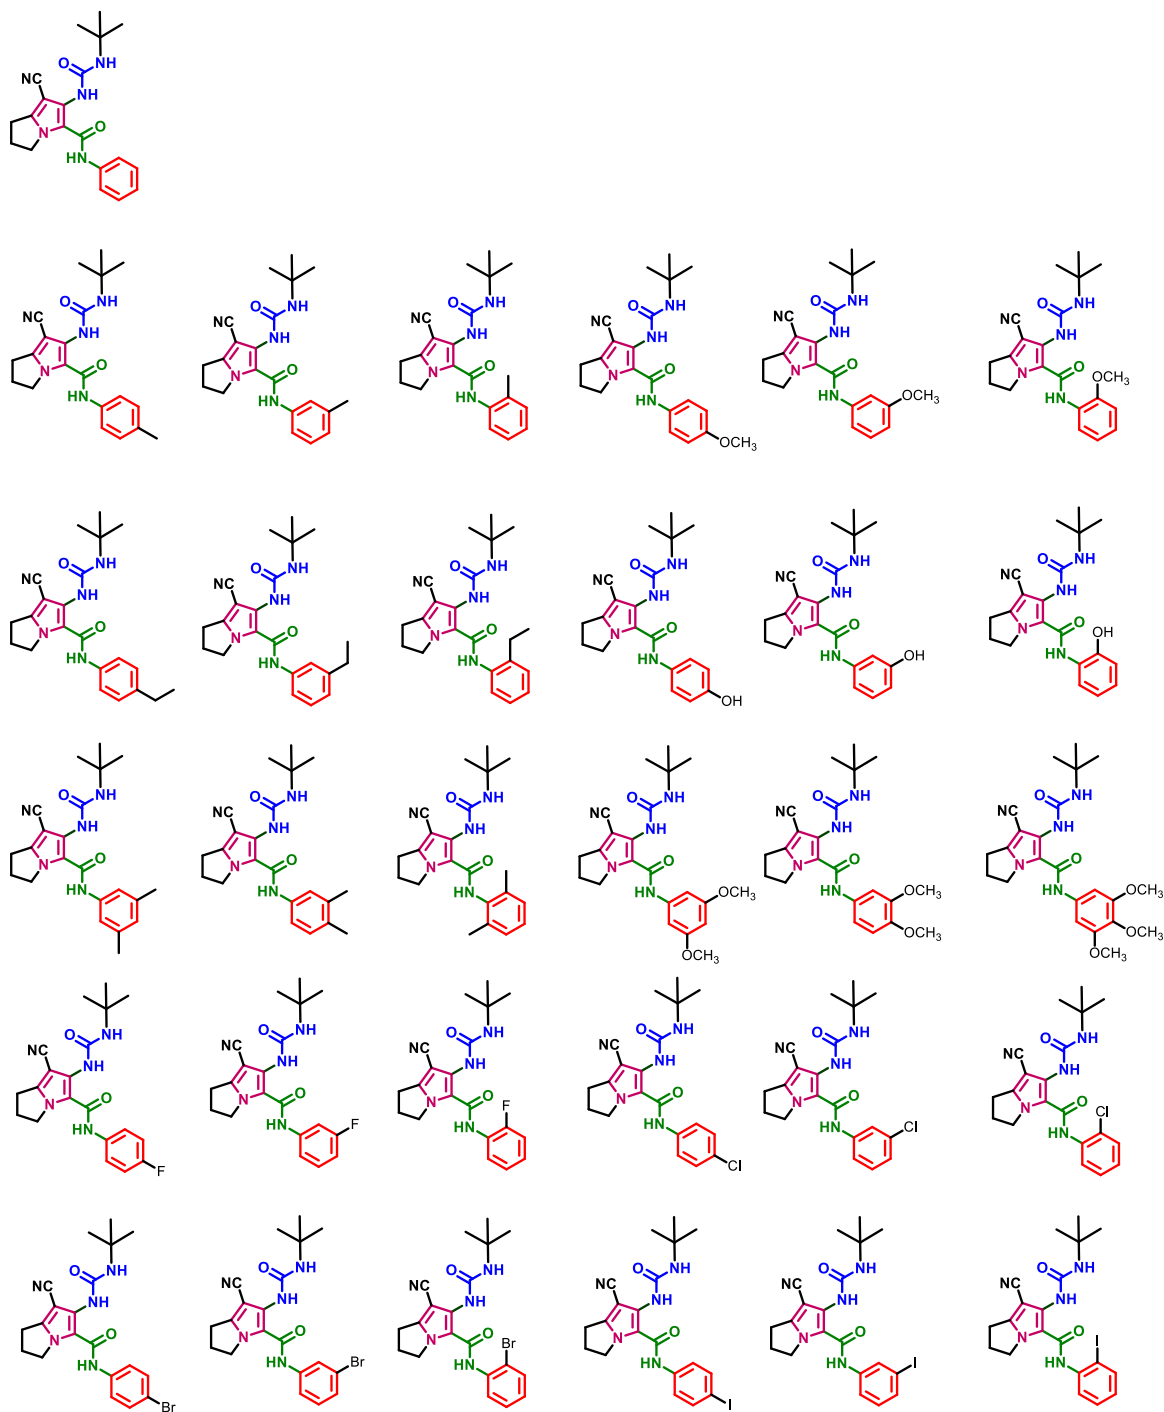

**Figure S9. Chemical structure of compound 249-279 (tertbutyl)**

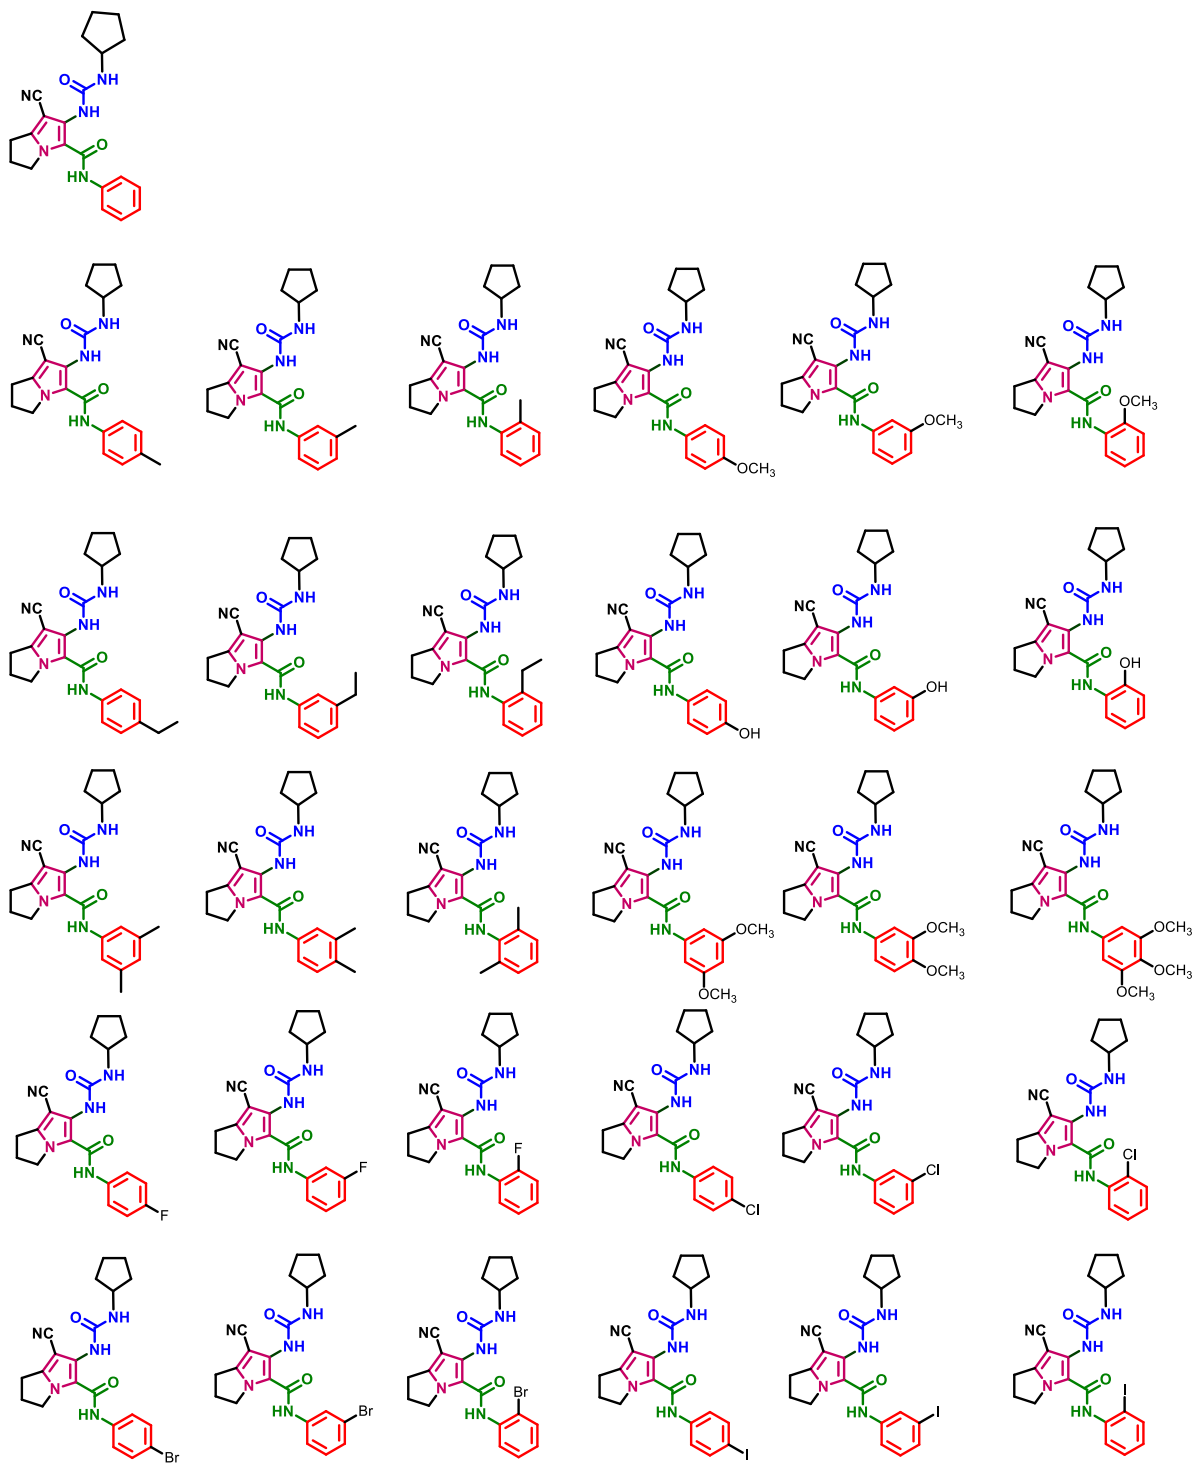

**Figure S10. Chemical structure of compound 280-310 (cyclopentyl)**



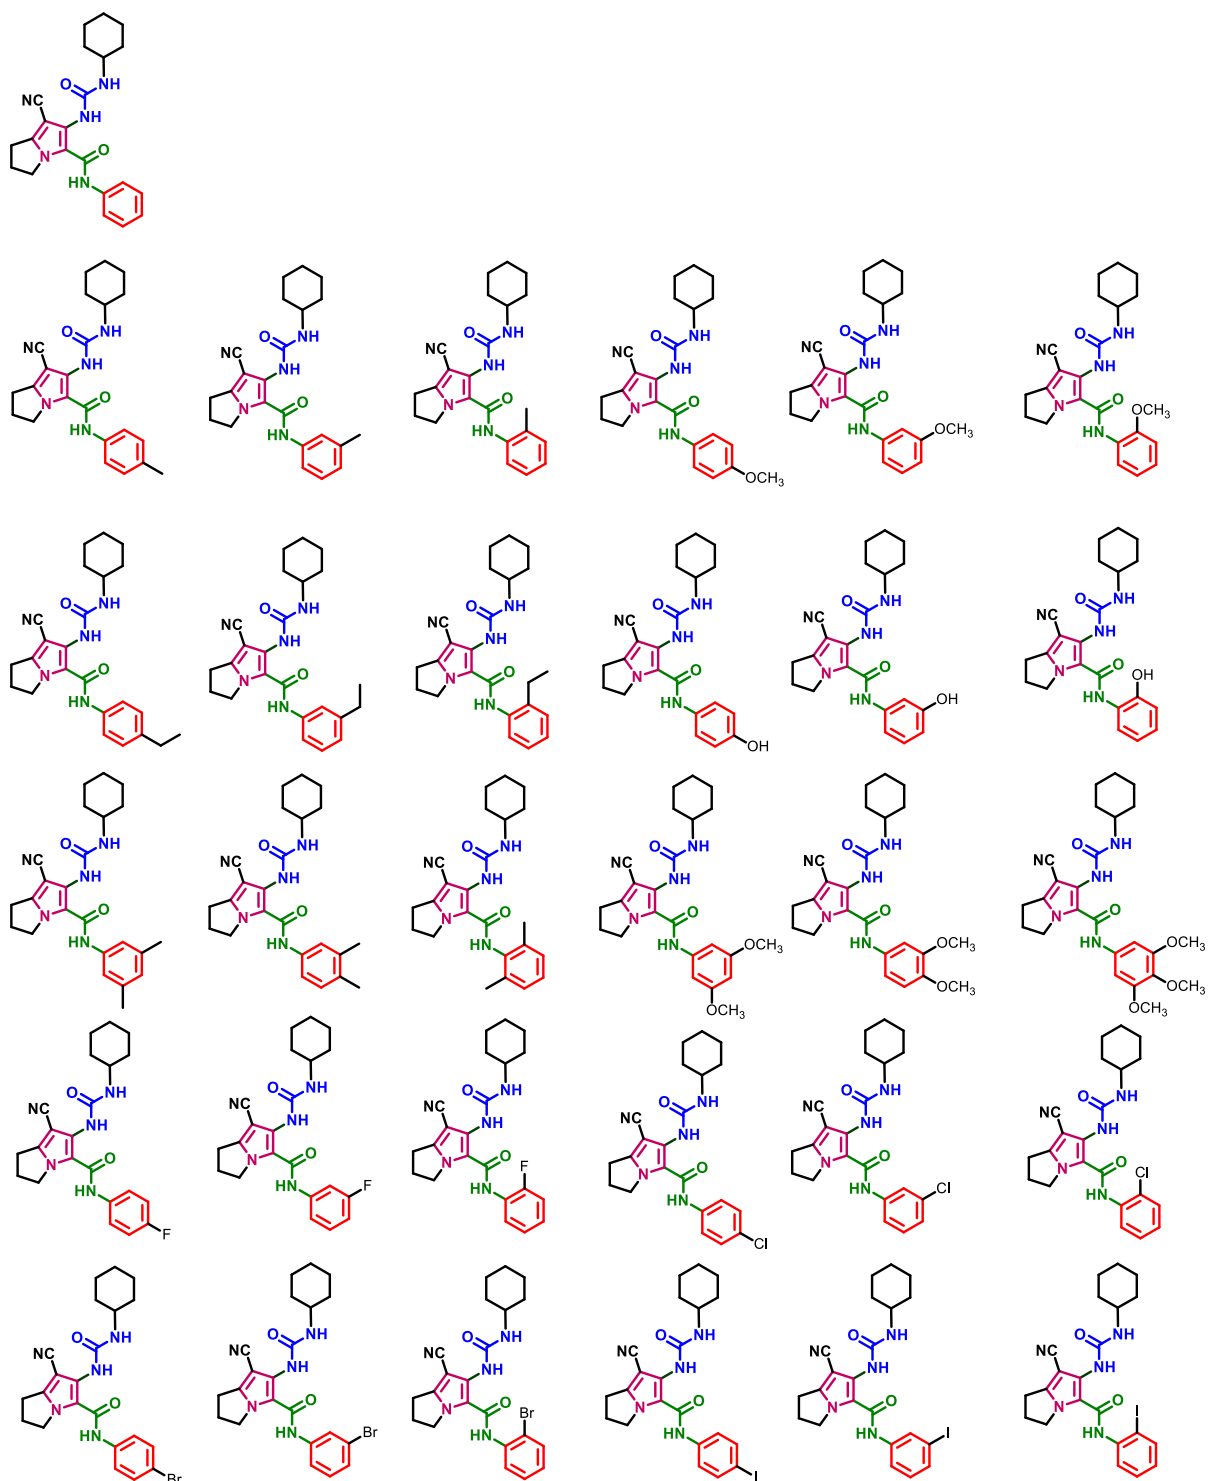

**Figure S11.** Chemical structure of compound 311-341 (cyclohexyl)

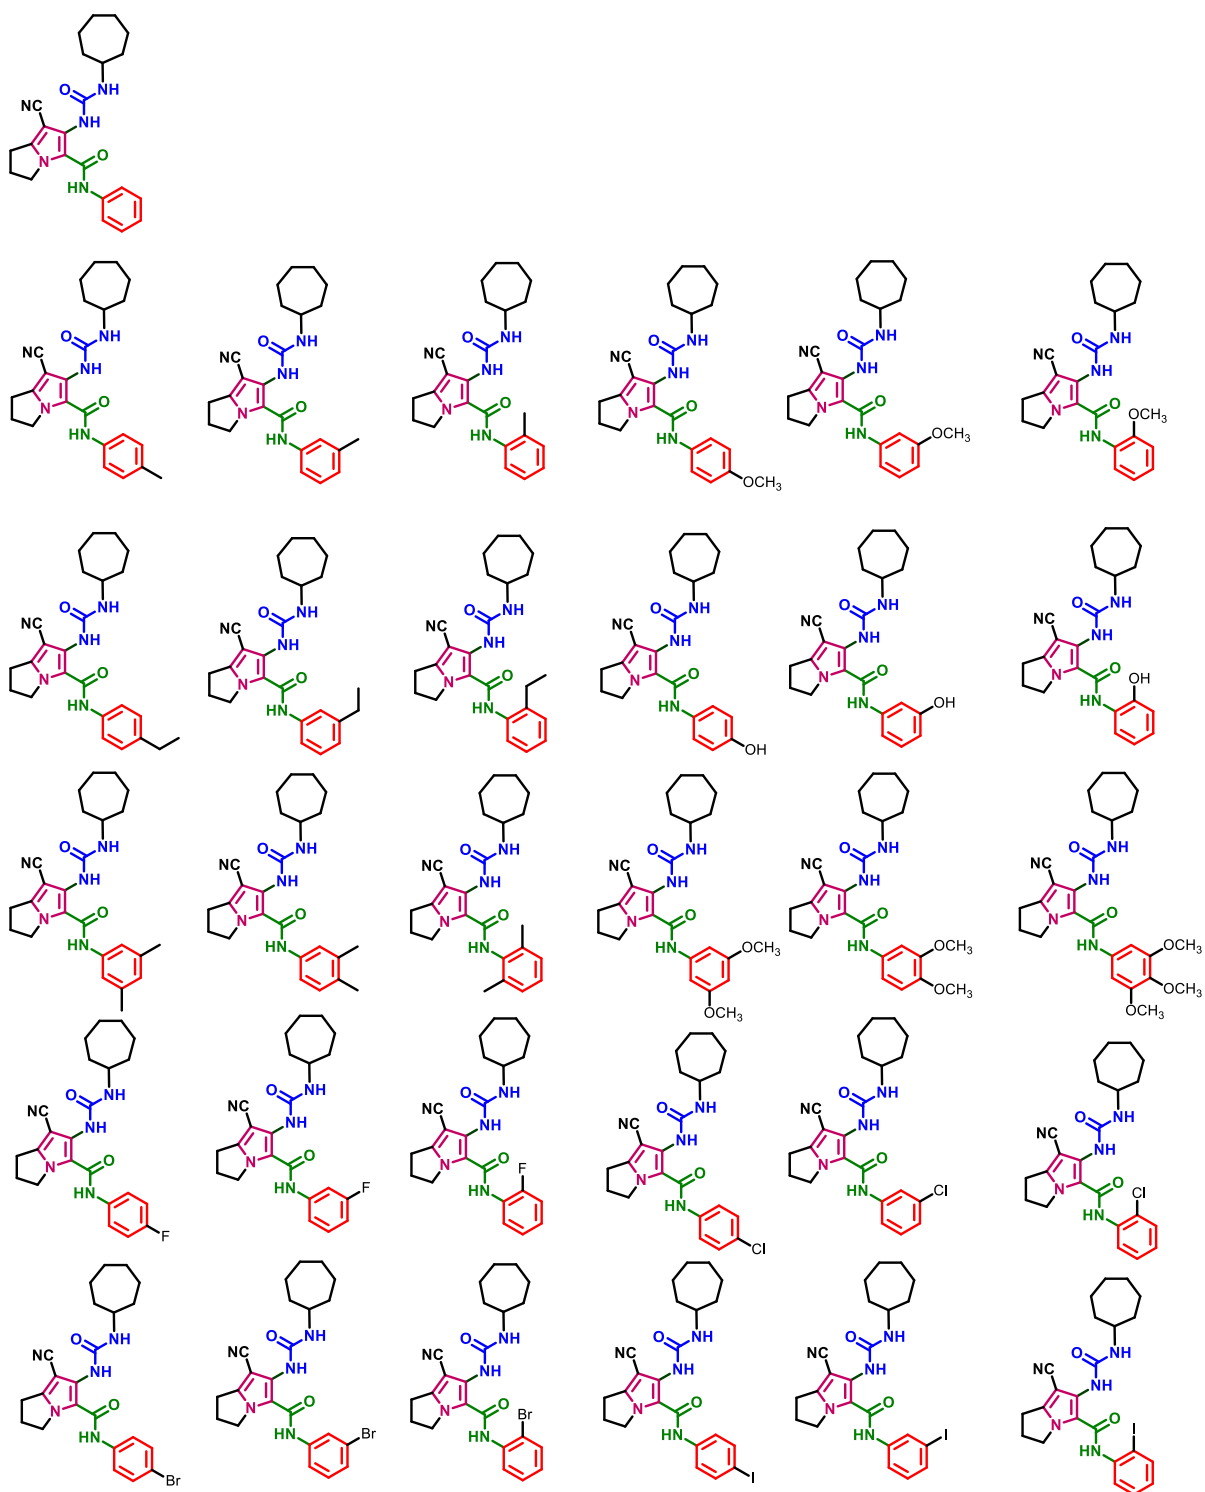

**Figure S12.** Chemical structure of compound 342-372 (cycloheptyl)

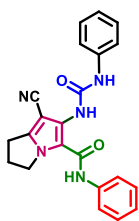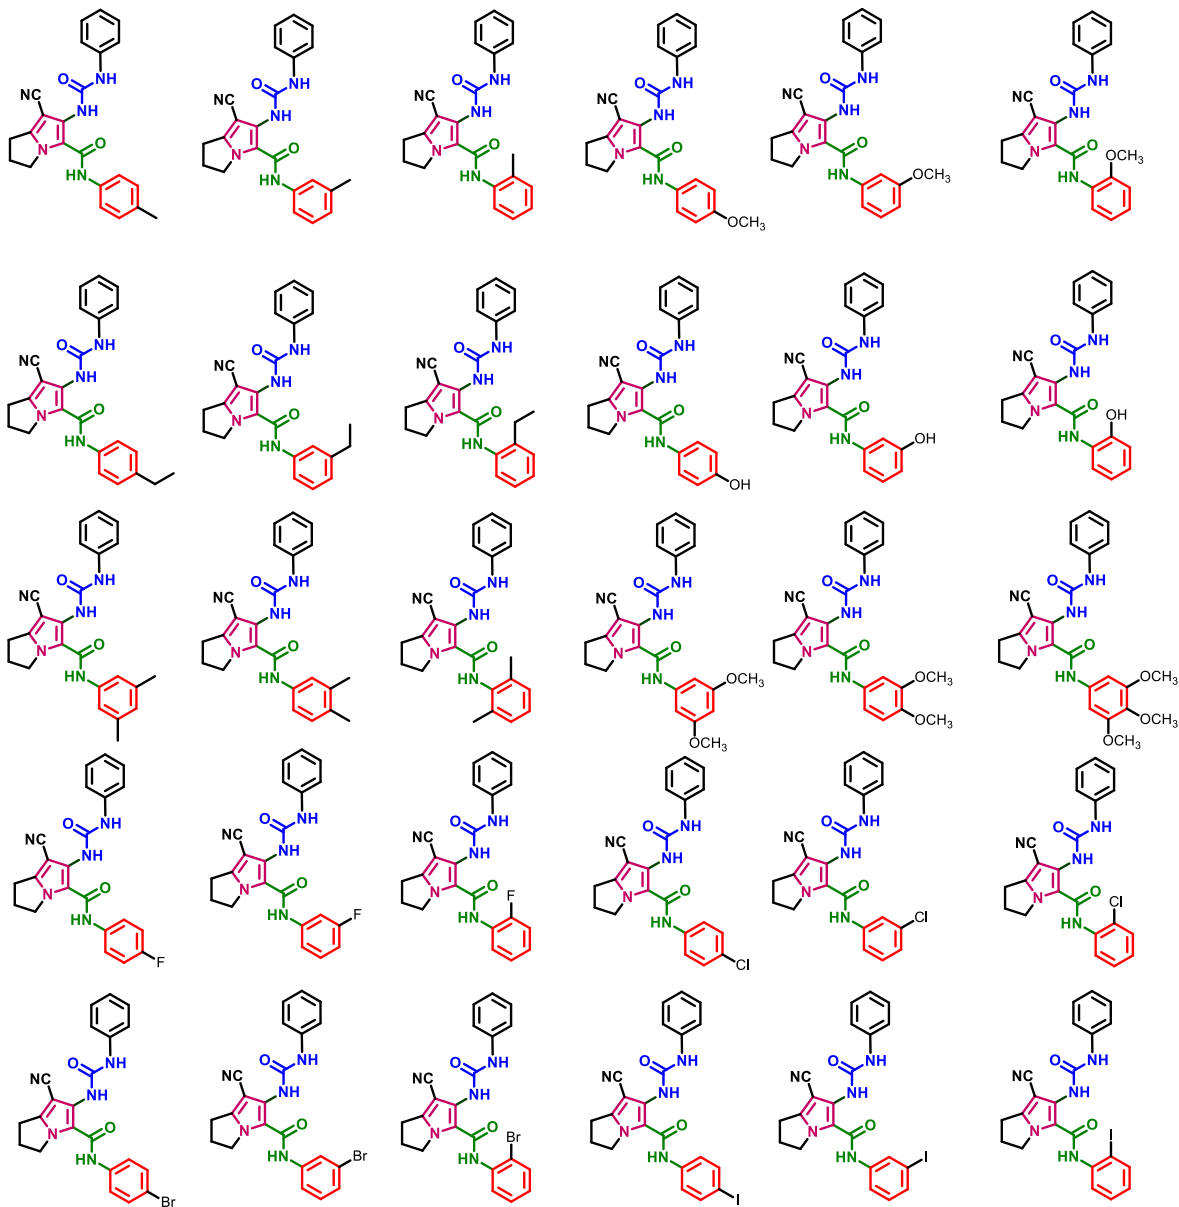

**Figure S13.** Chemical structure of compound 373-403 (phenyliso)

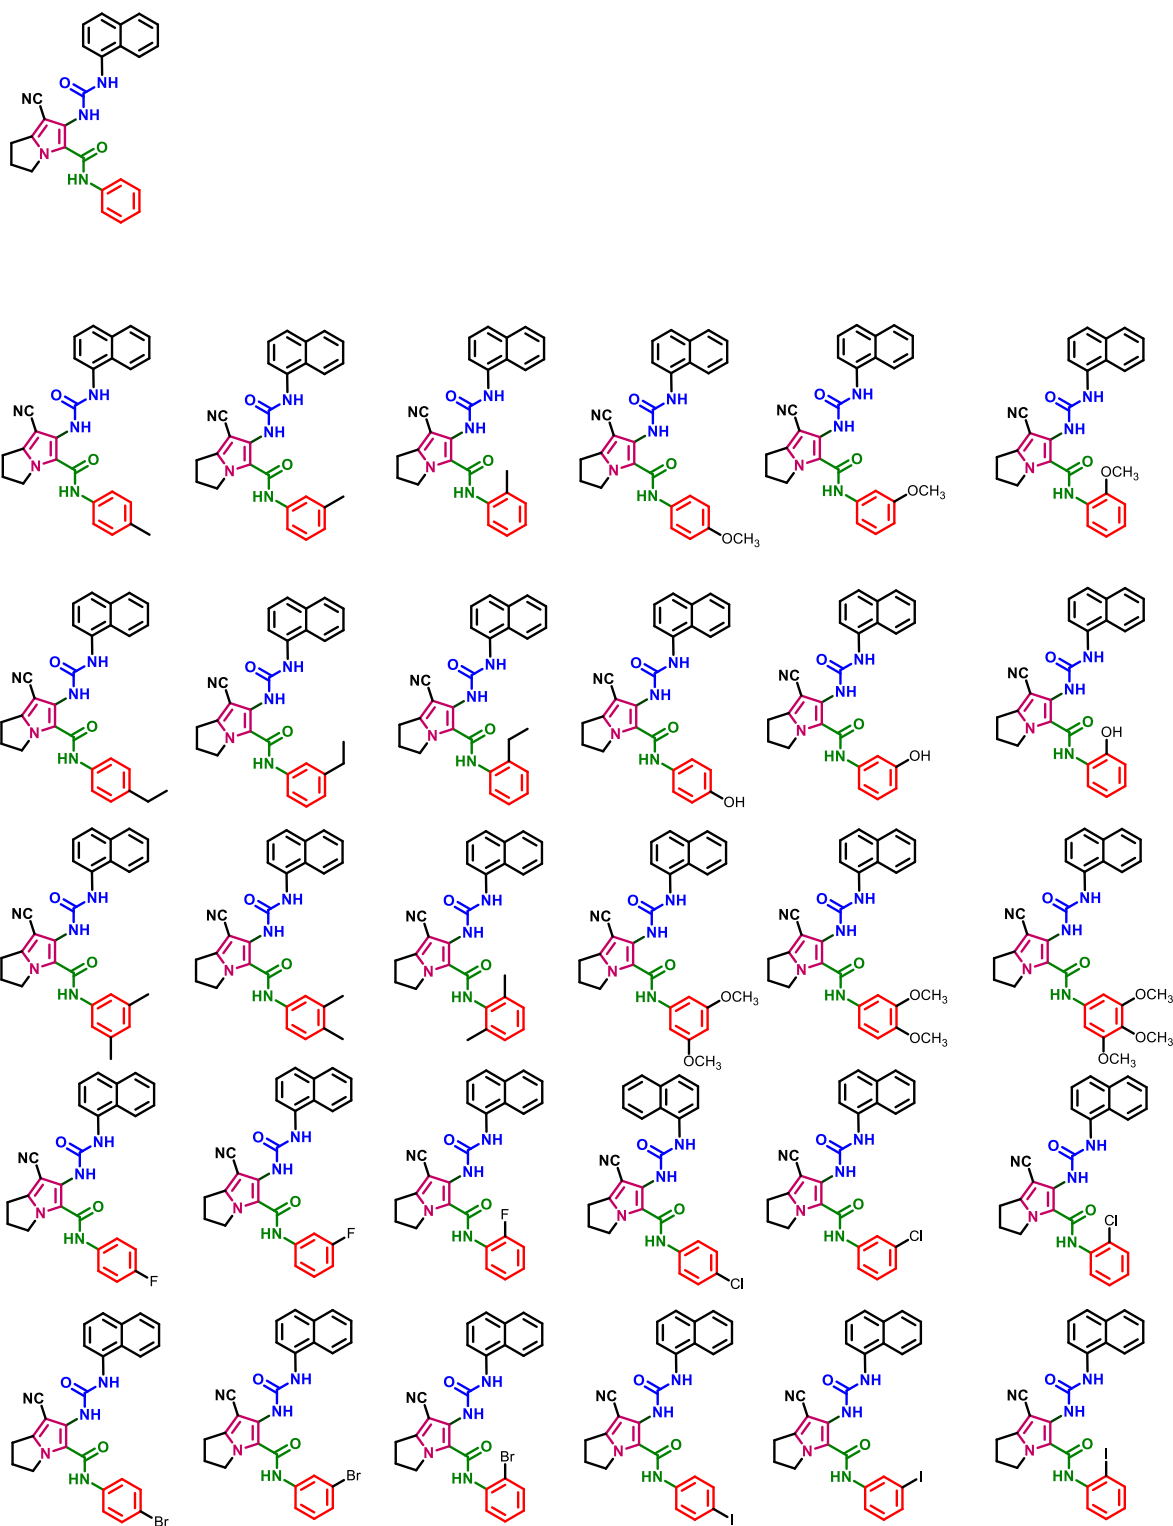

**Figure S14. Chemical structure of compound 404-434 (1naphthyliso)**

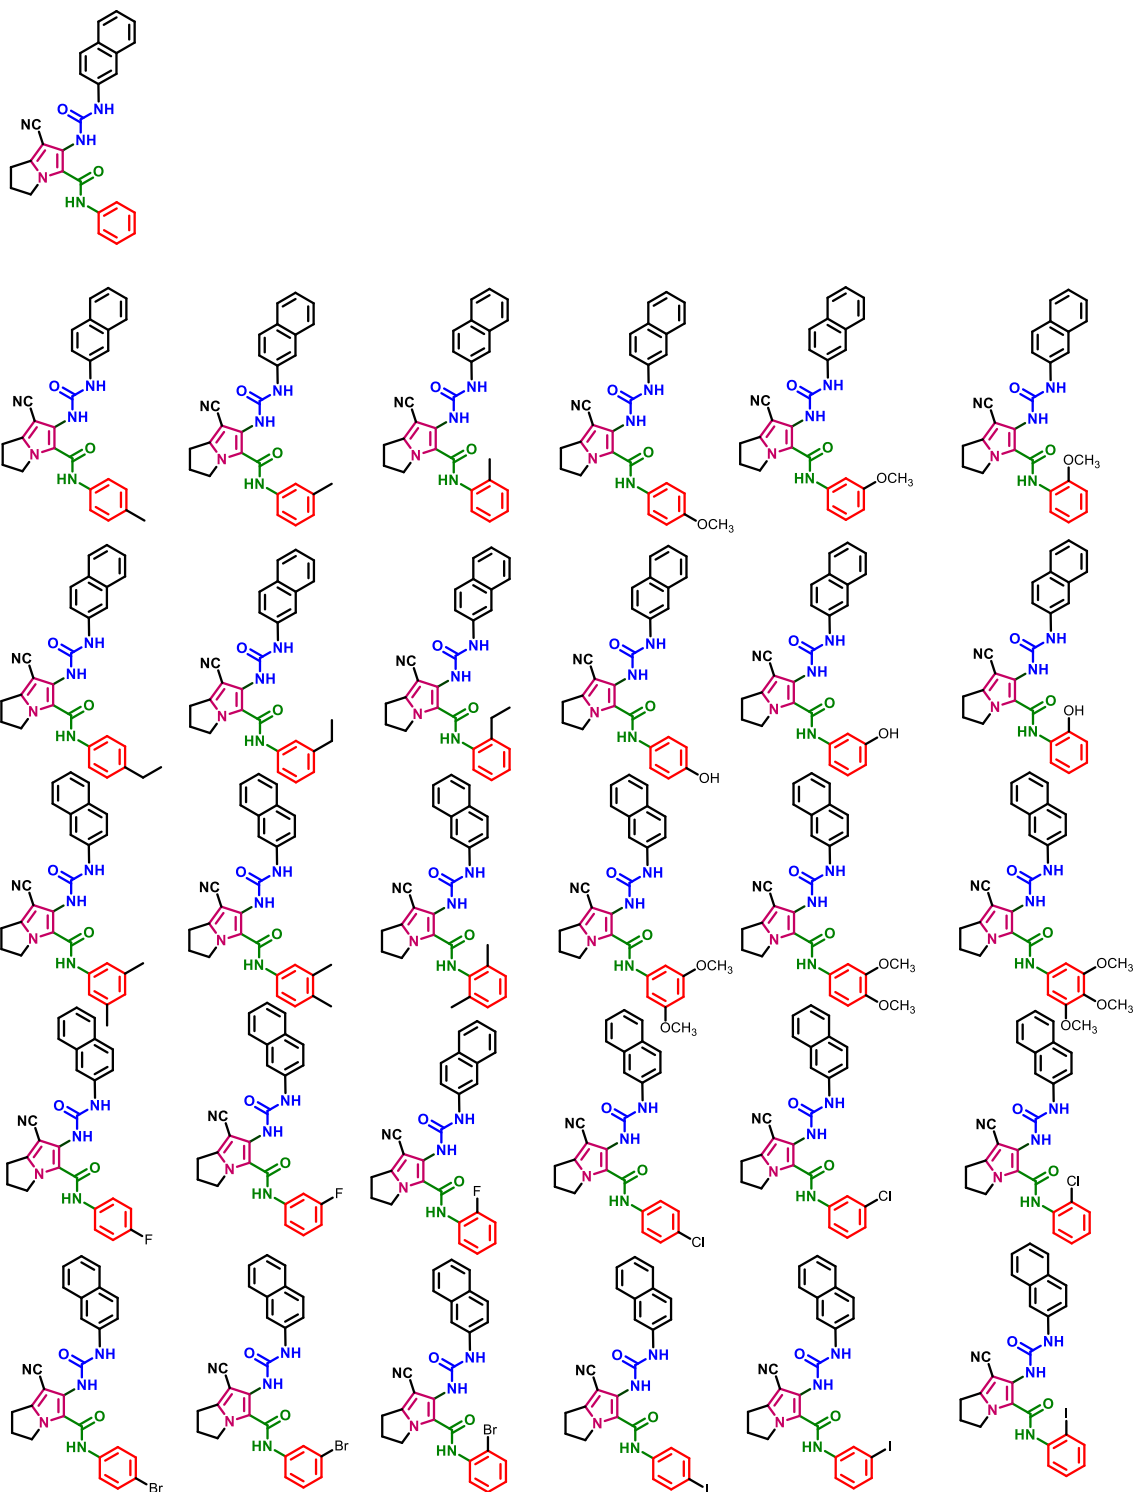

**Figure S15. Chemical structure of compound 435-465 (2naphthyliso)**

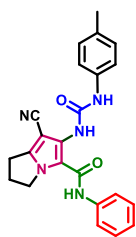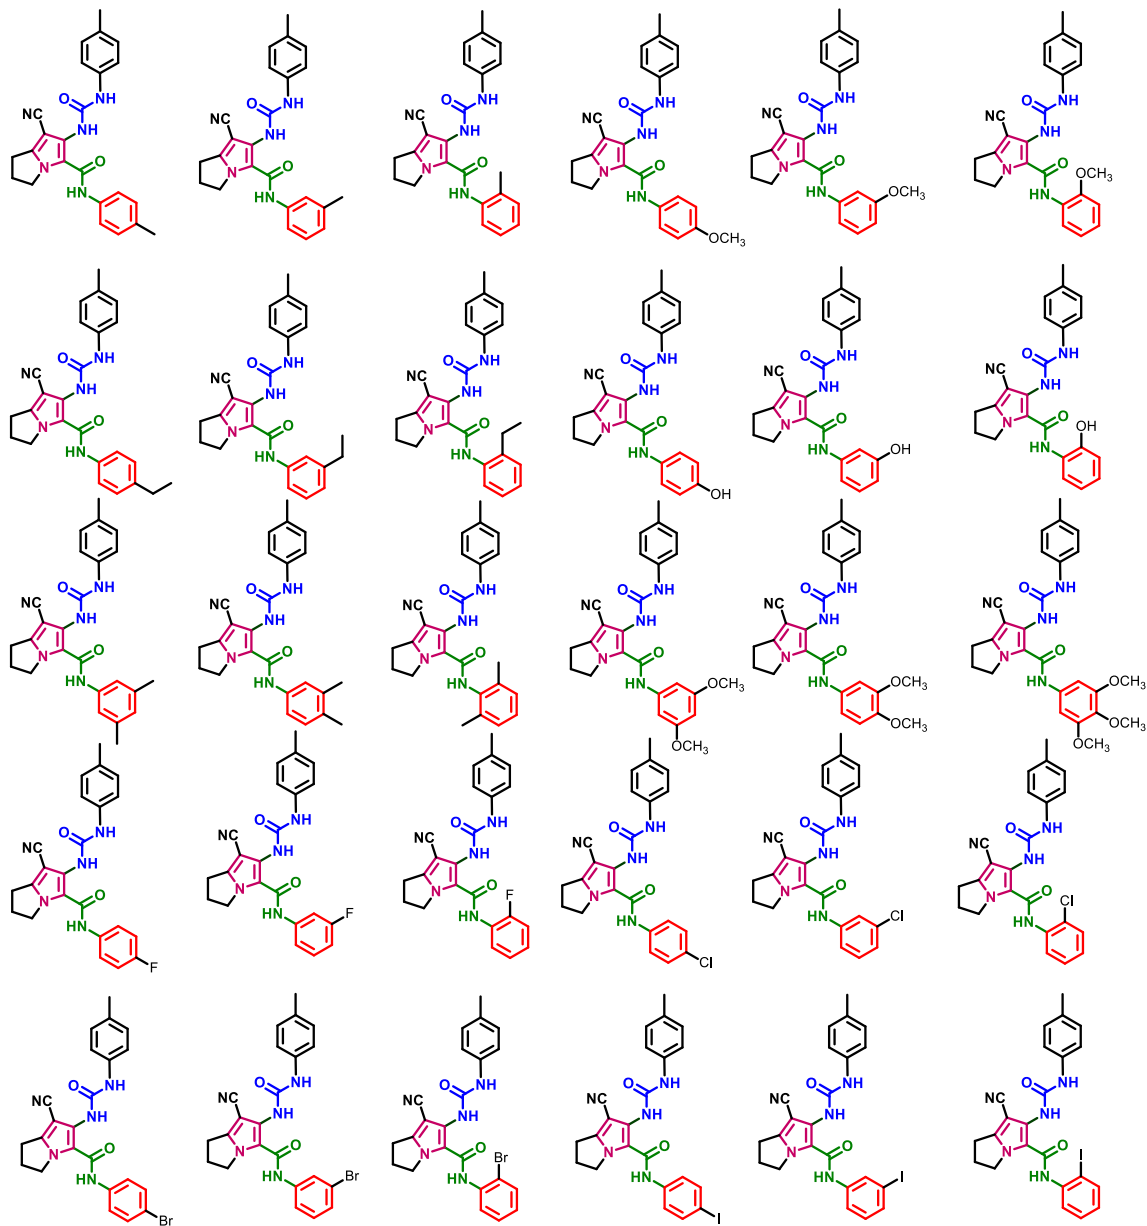

**Figure S16.** Chemical structure of compound 466-496 (4methylphenyliso)

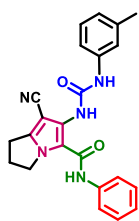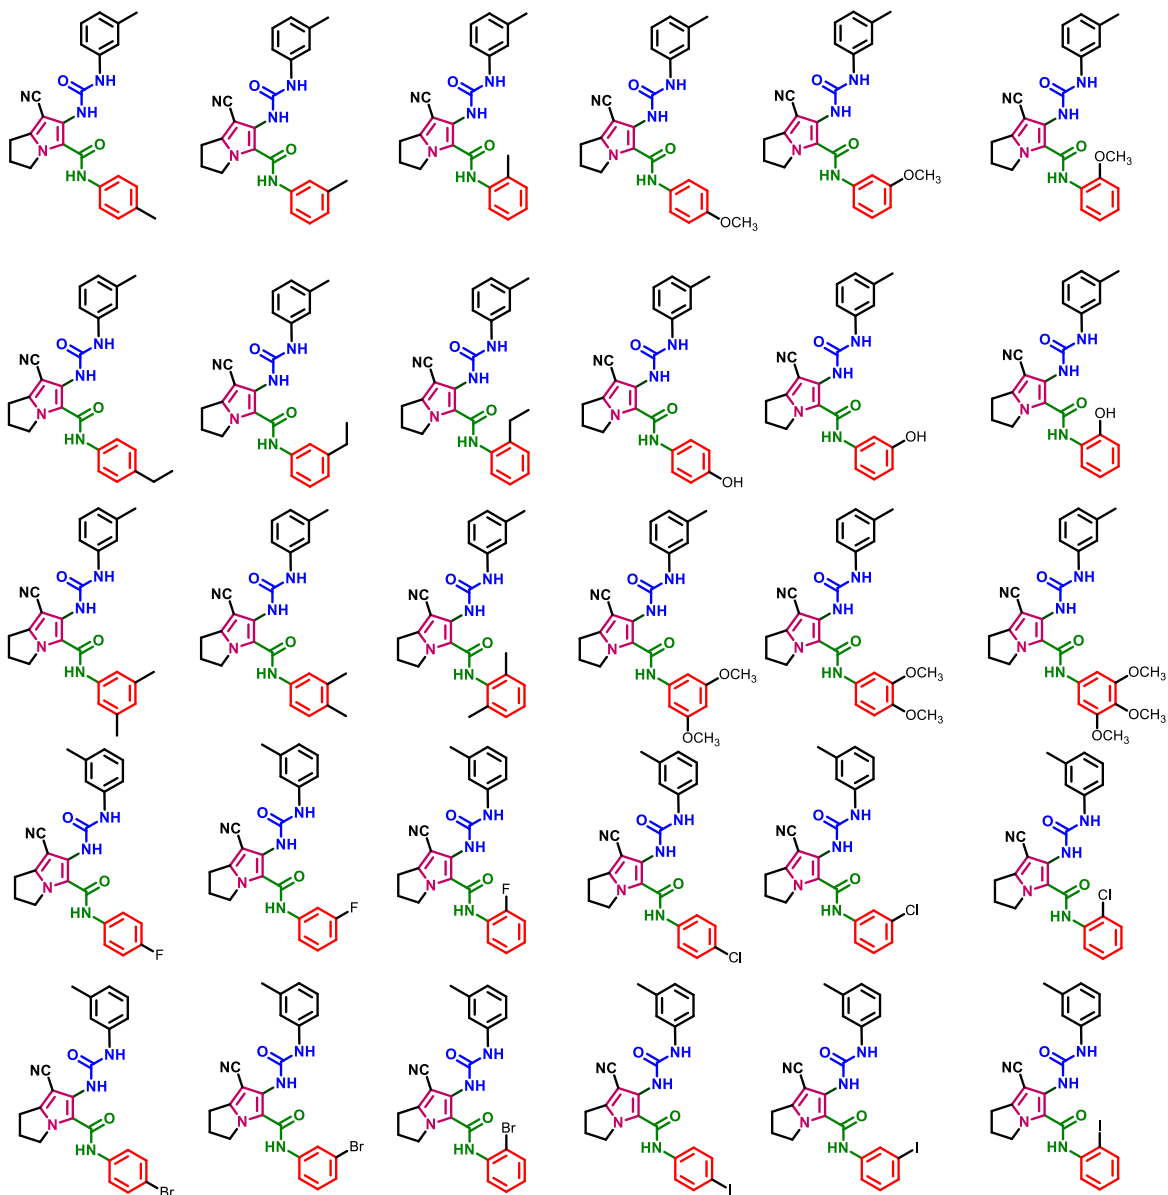

**Figure S17.** Chemical structure of compound 497-527 (3methylphenyliso)

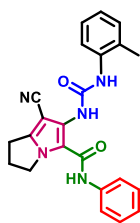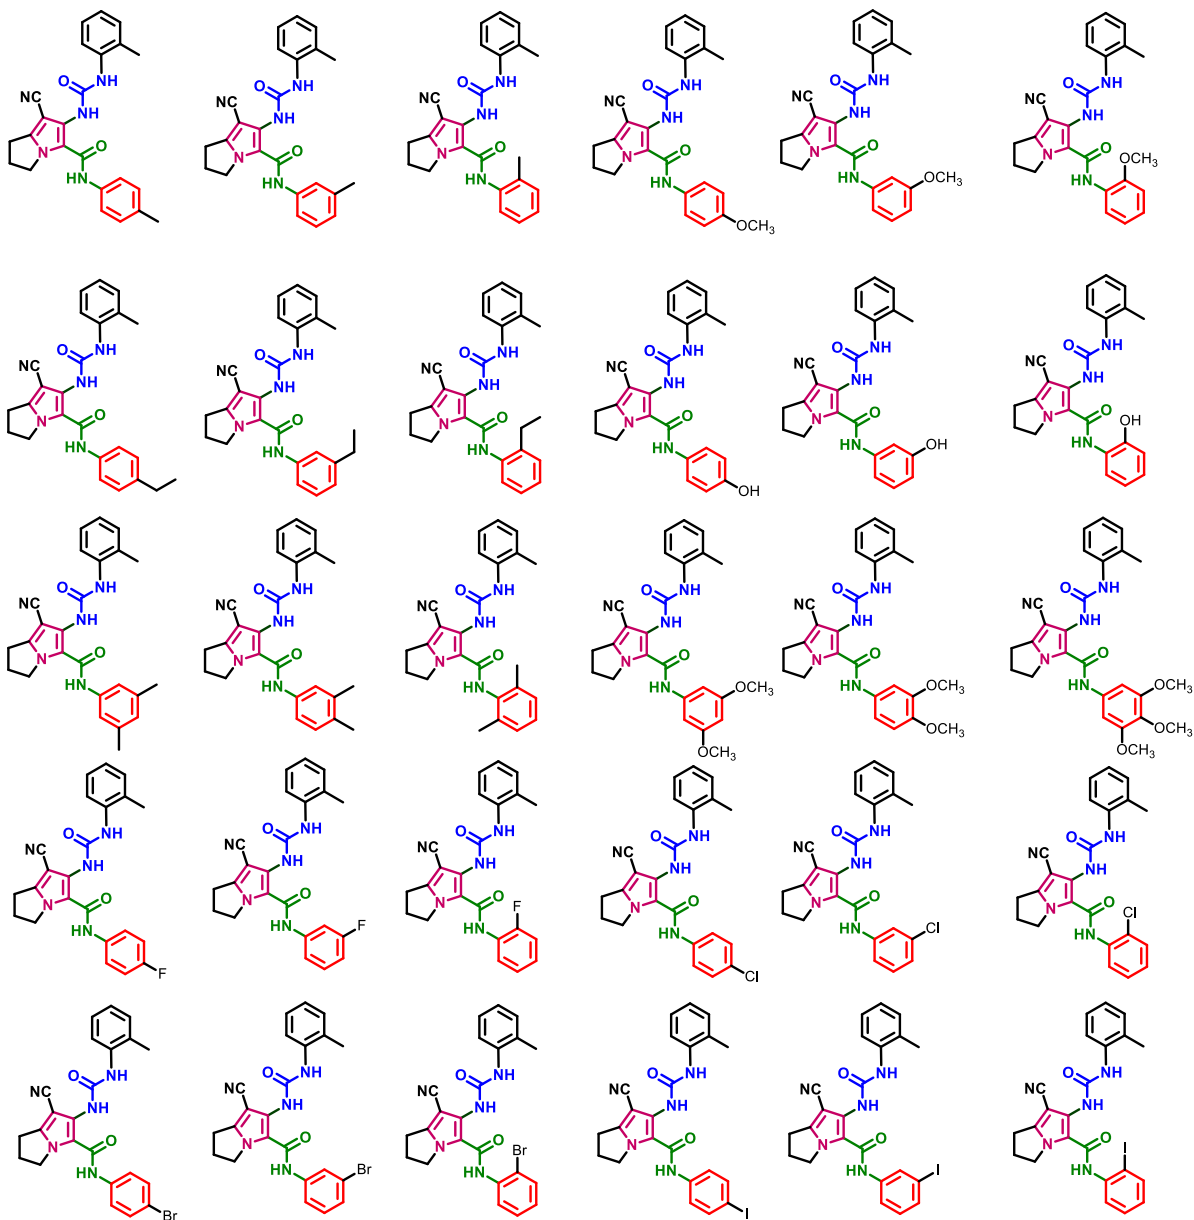

**Figure S18.** Chemical structure of compound 528-558 (2methylphenyliso)



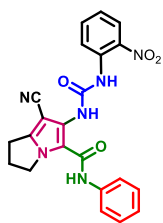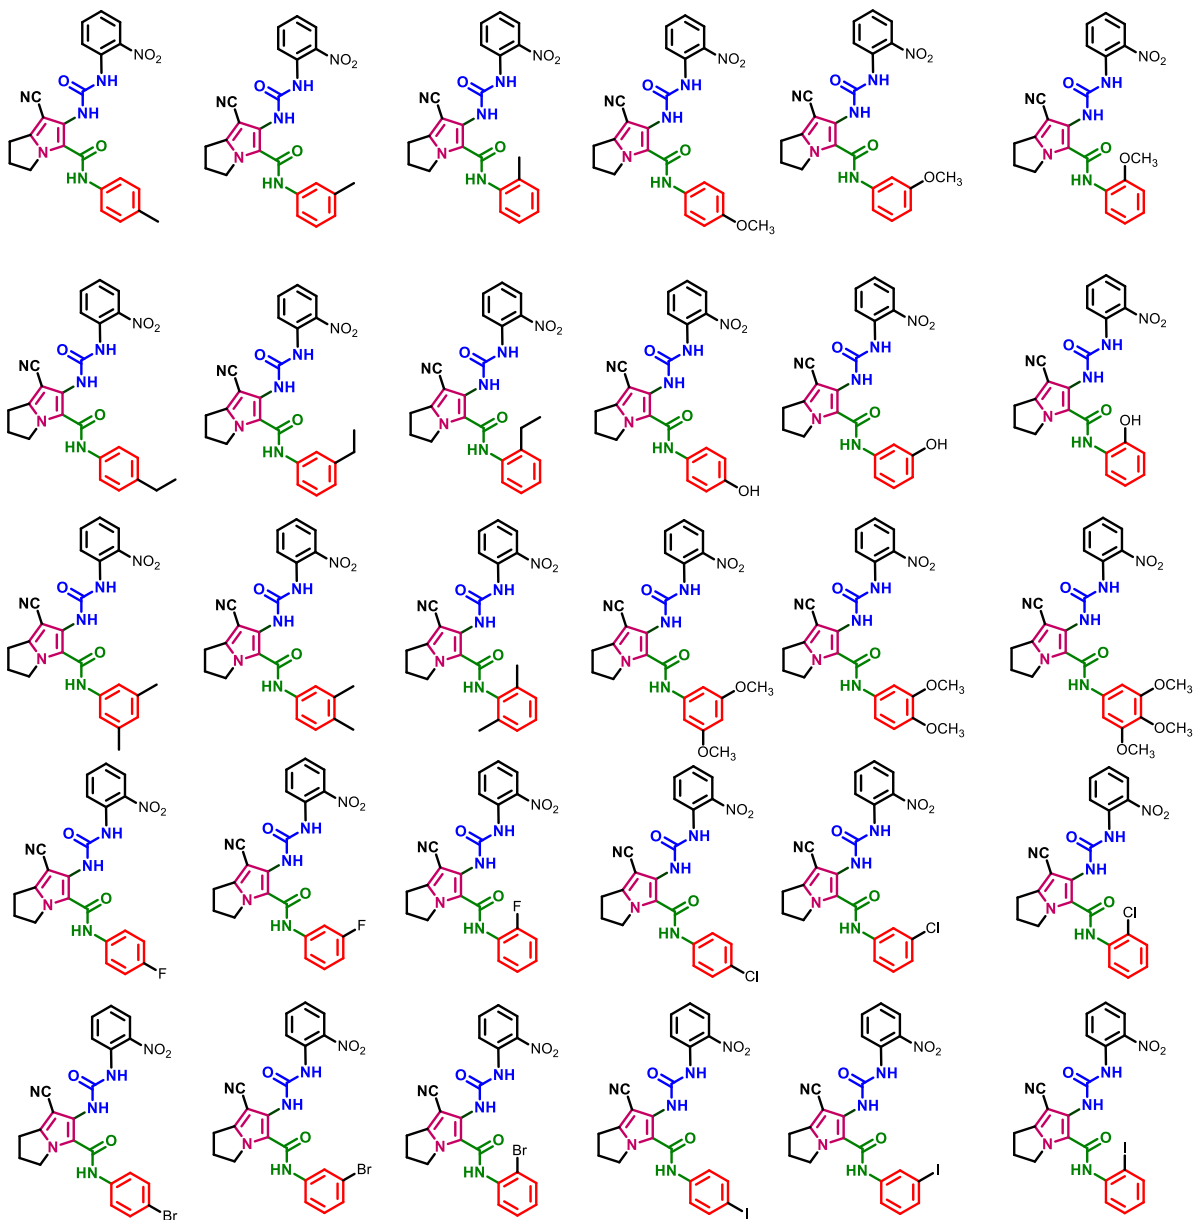

**Figure S19.** Chemical structure of compound 559-589 (2nitrophenyliso)

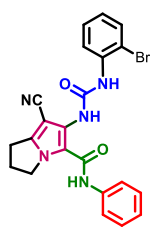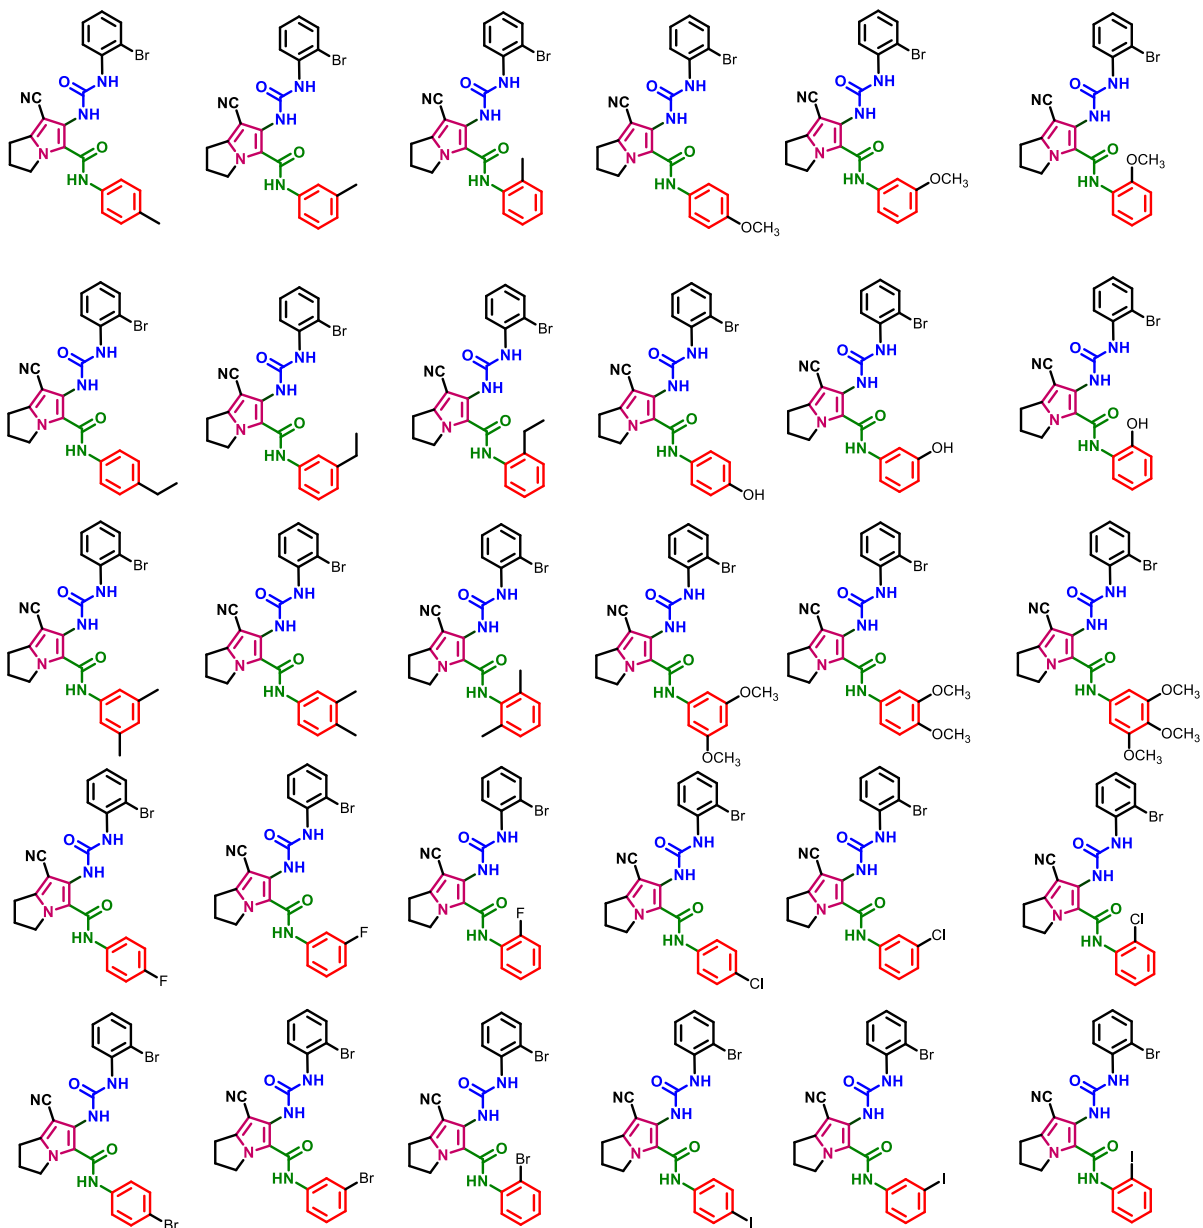

**Figure S20.** Chemical structure of compound 590-620 (2bromophenyliso)

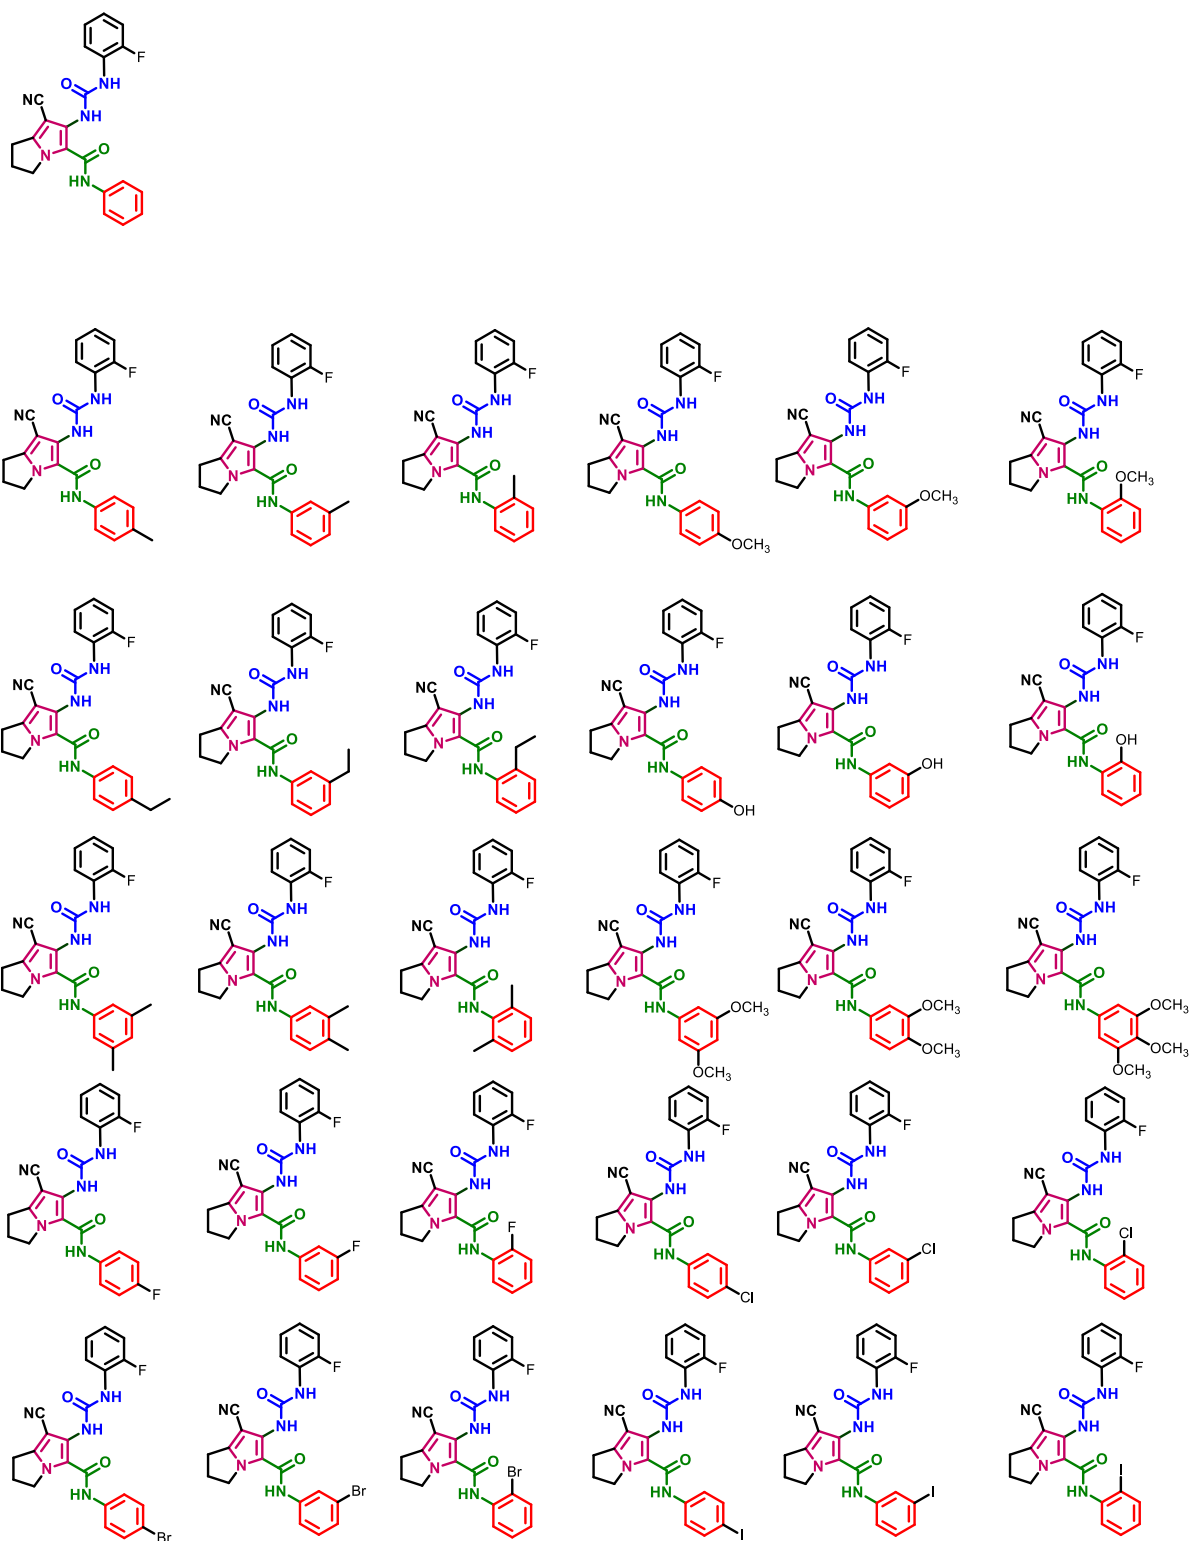

**Figure B21.** Chemical structure of compound 621-651 (2fluorophenyliso)

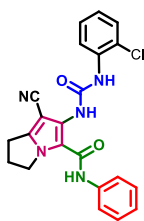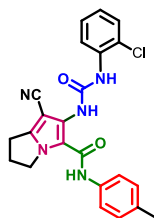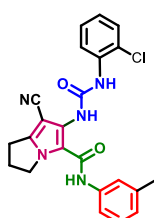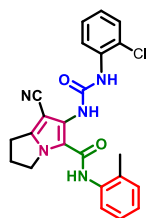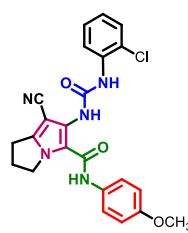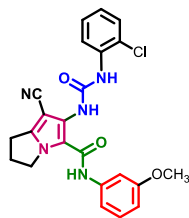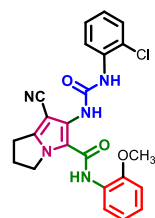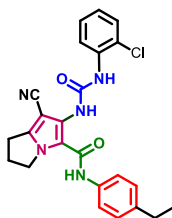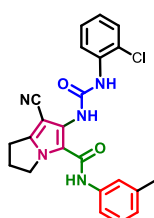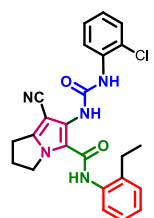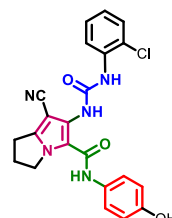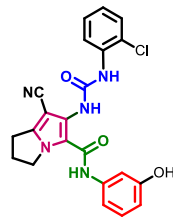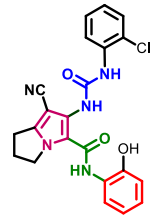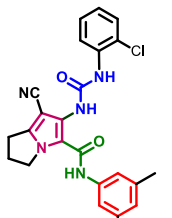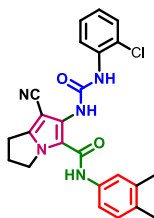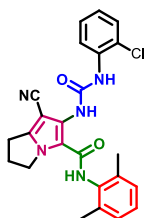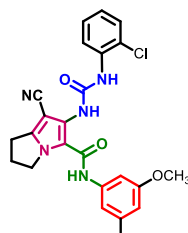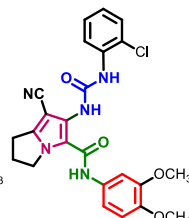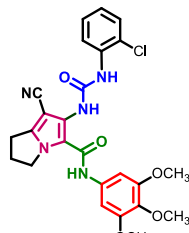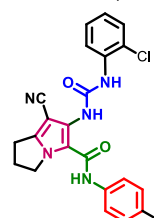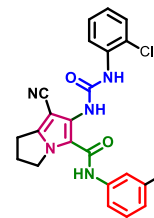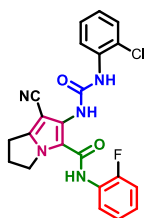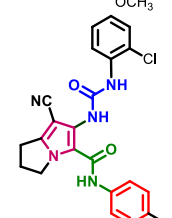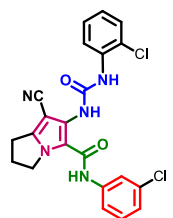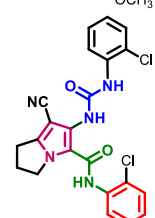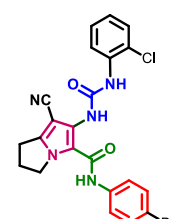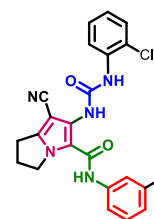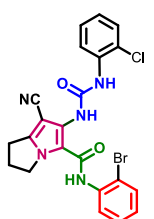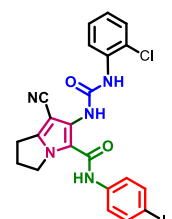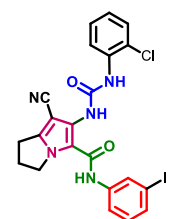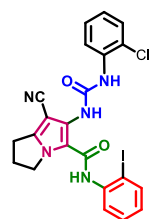

**Figure S22.** Chemical structure of compound 652-682 (2chlorophenyliso)

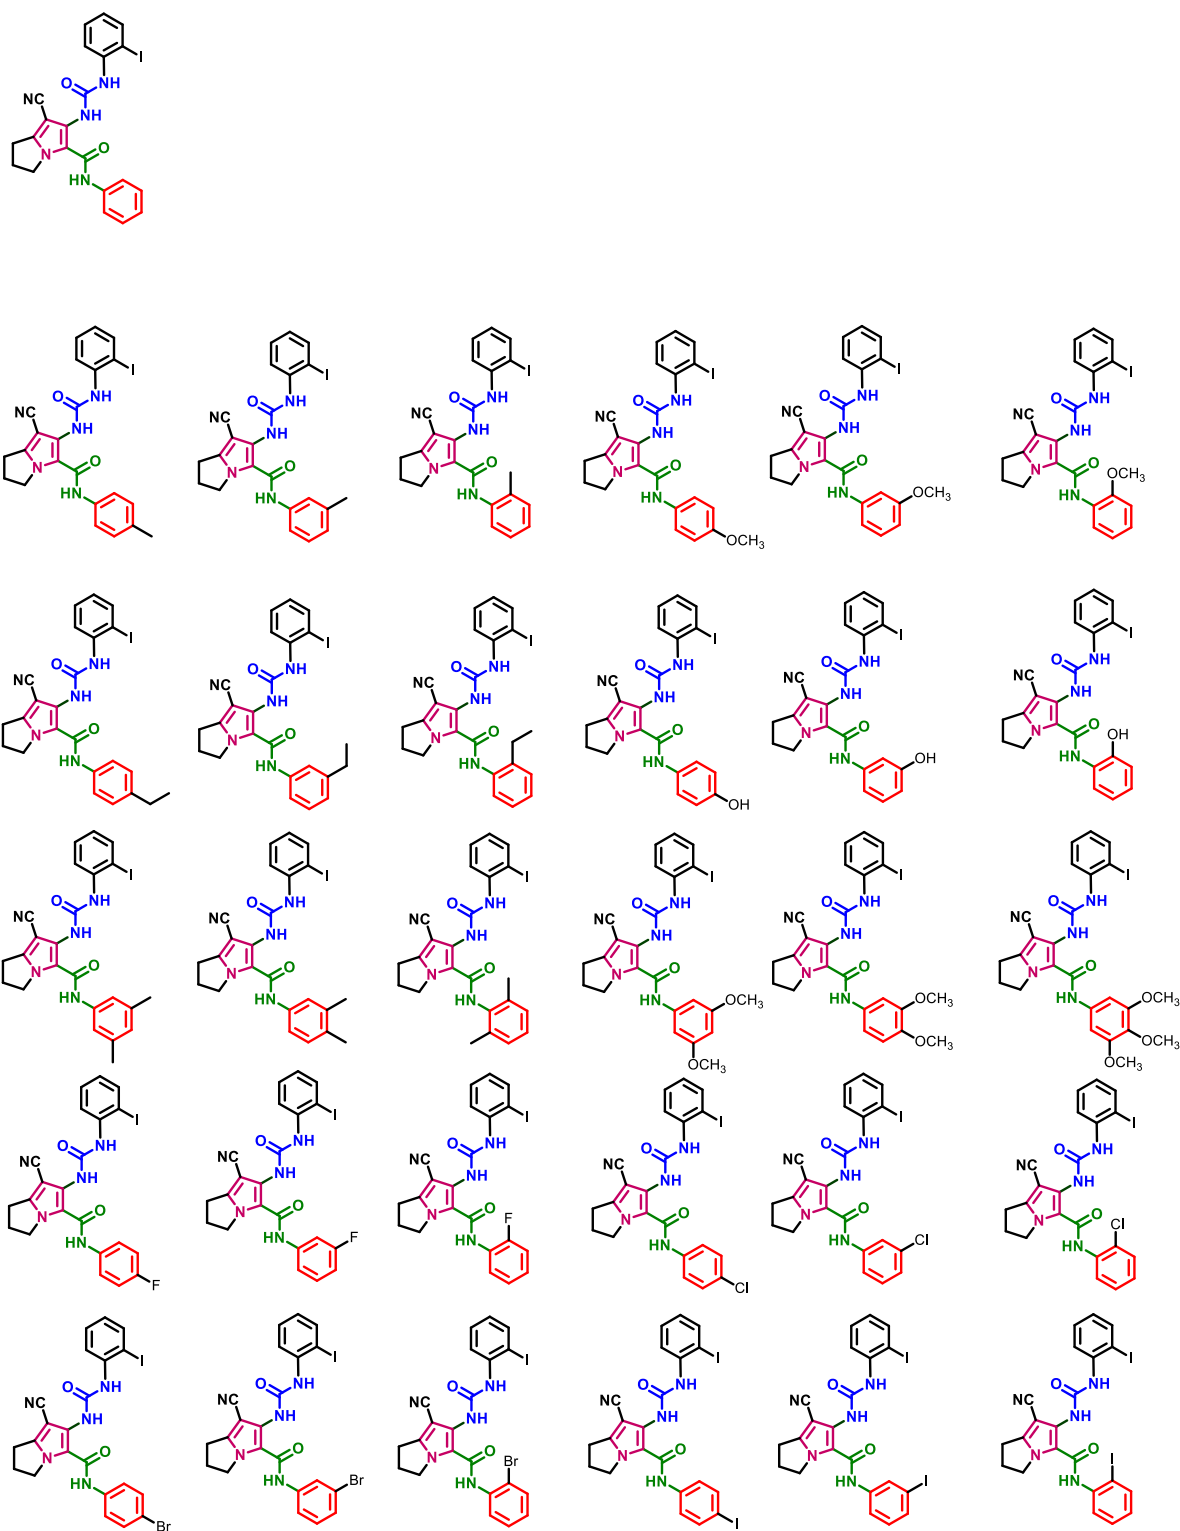

**Figure S23.** Chemical structure of compound 683-713 (2iodophenyliso)

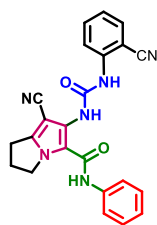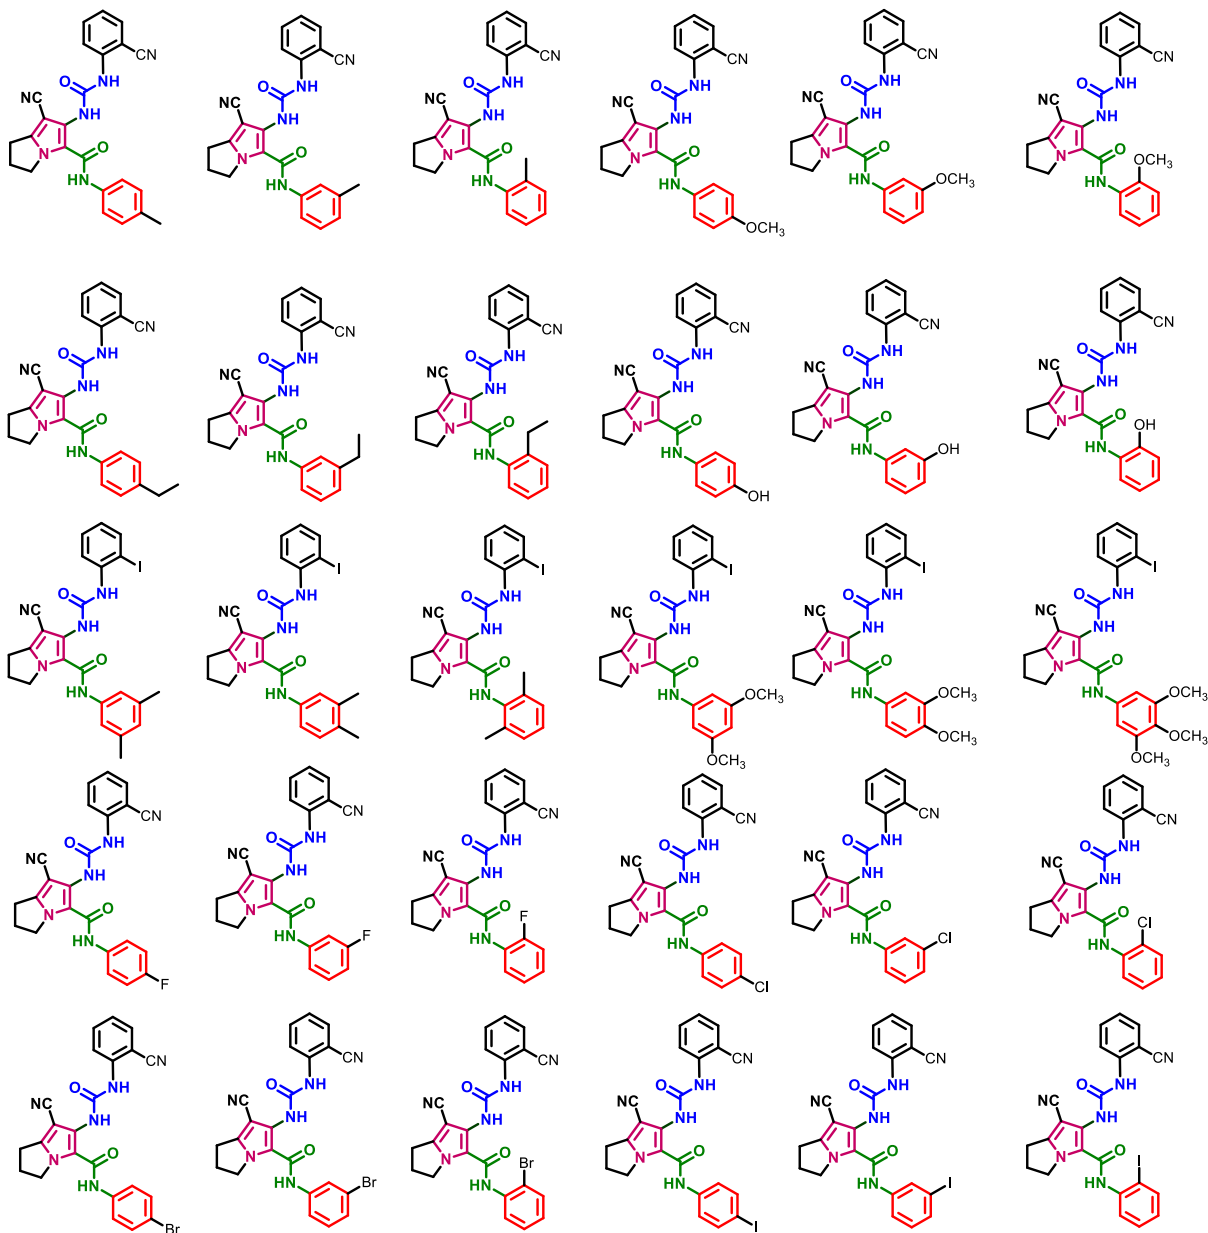

Figure S24. Chemical structure of compound 714-744 (2cyanophenyliso)

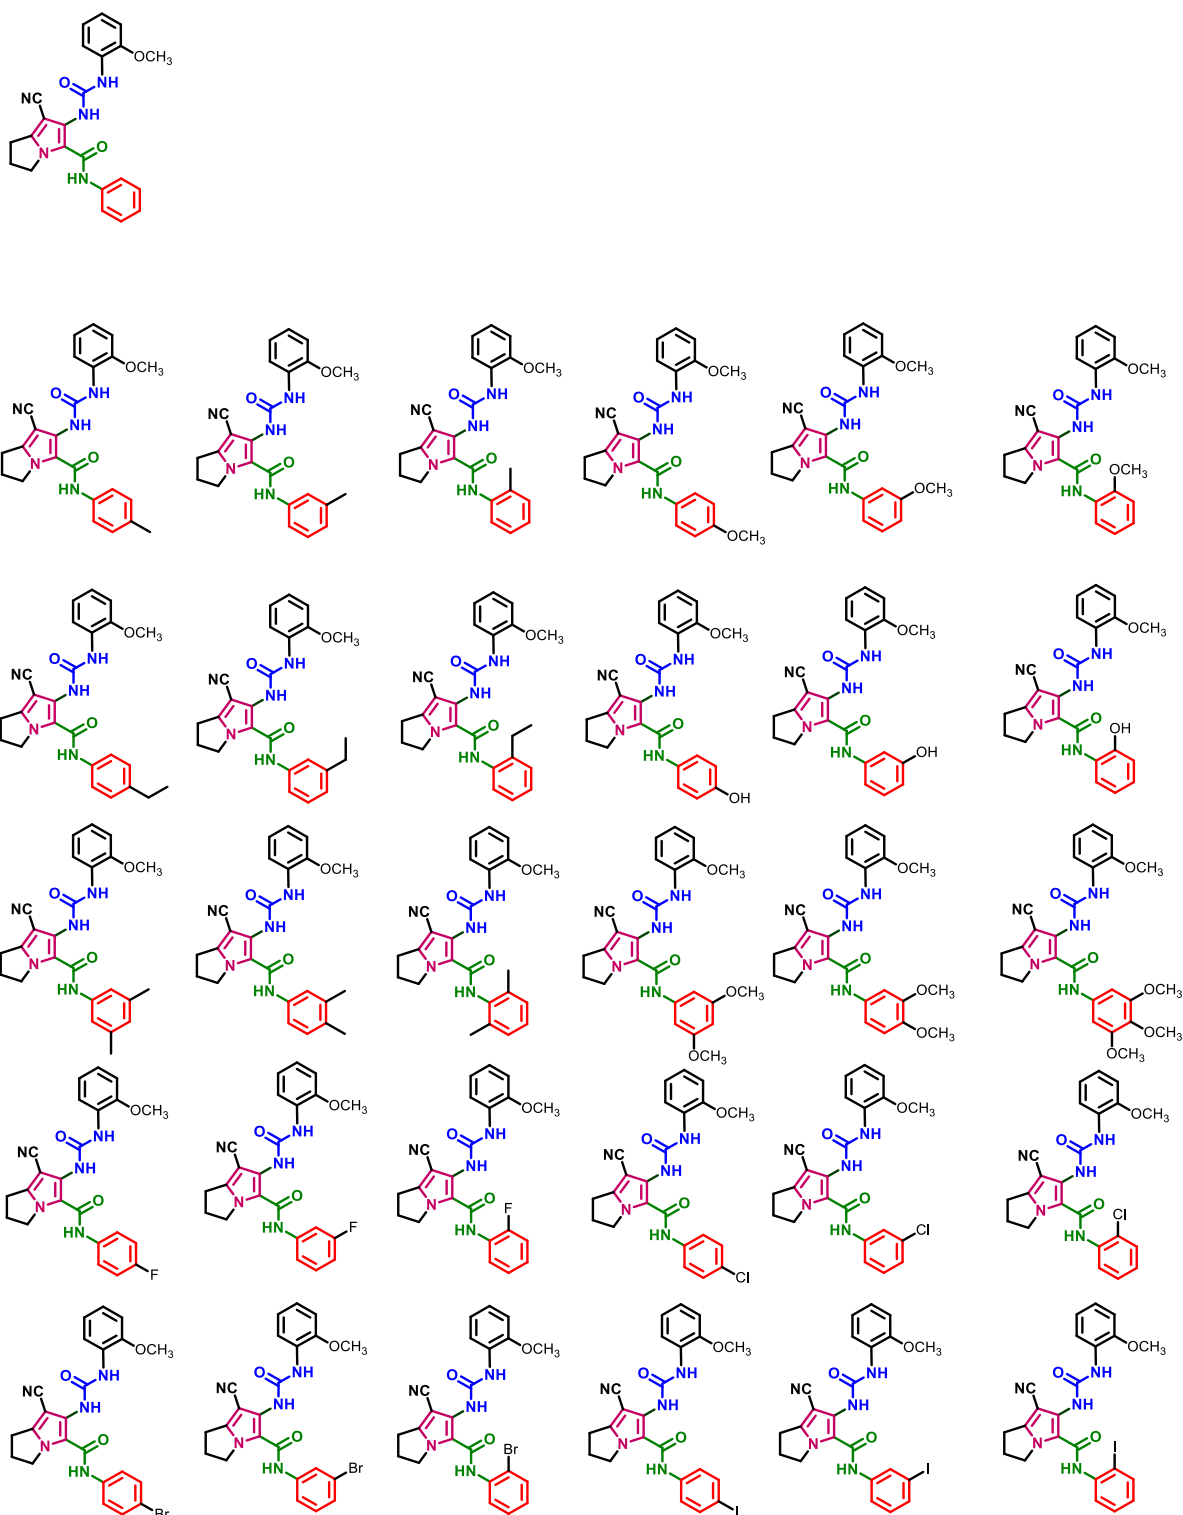

**Figure S25.** Chemical structure of compound 745-775 (2methoxyphenyliso)

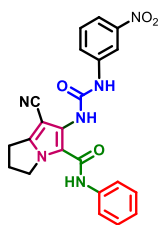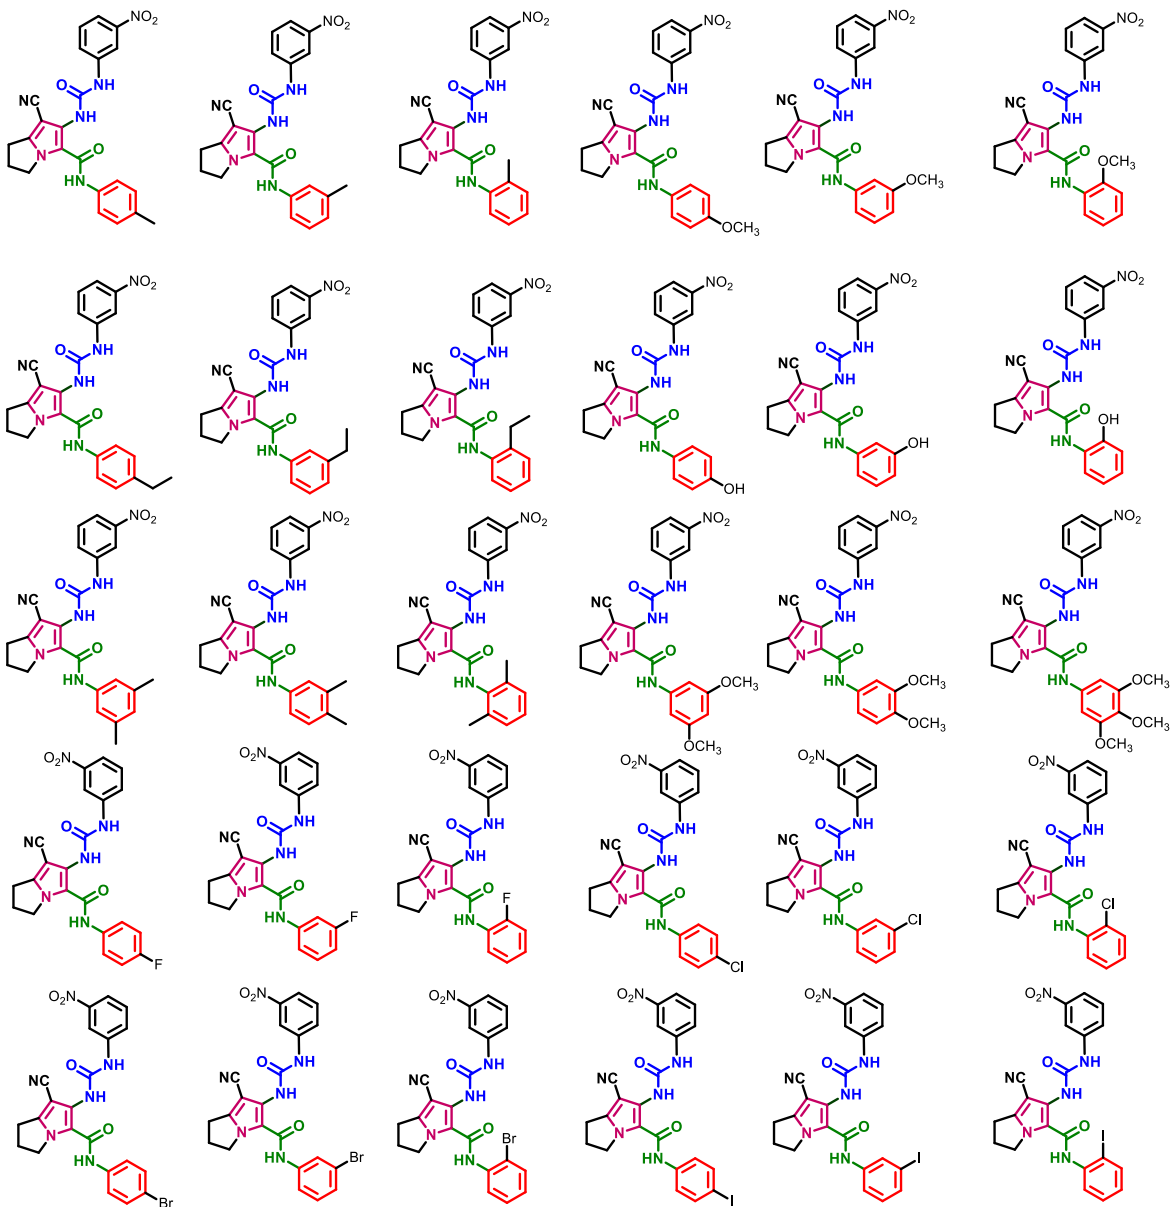

Figure S26. Chemical structure of compound 776-806 (3nitrophenyliso)



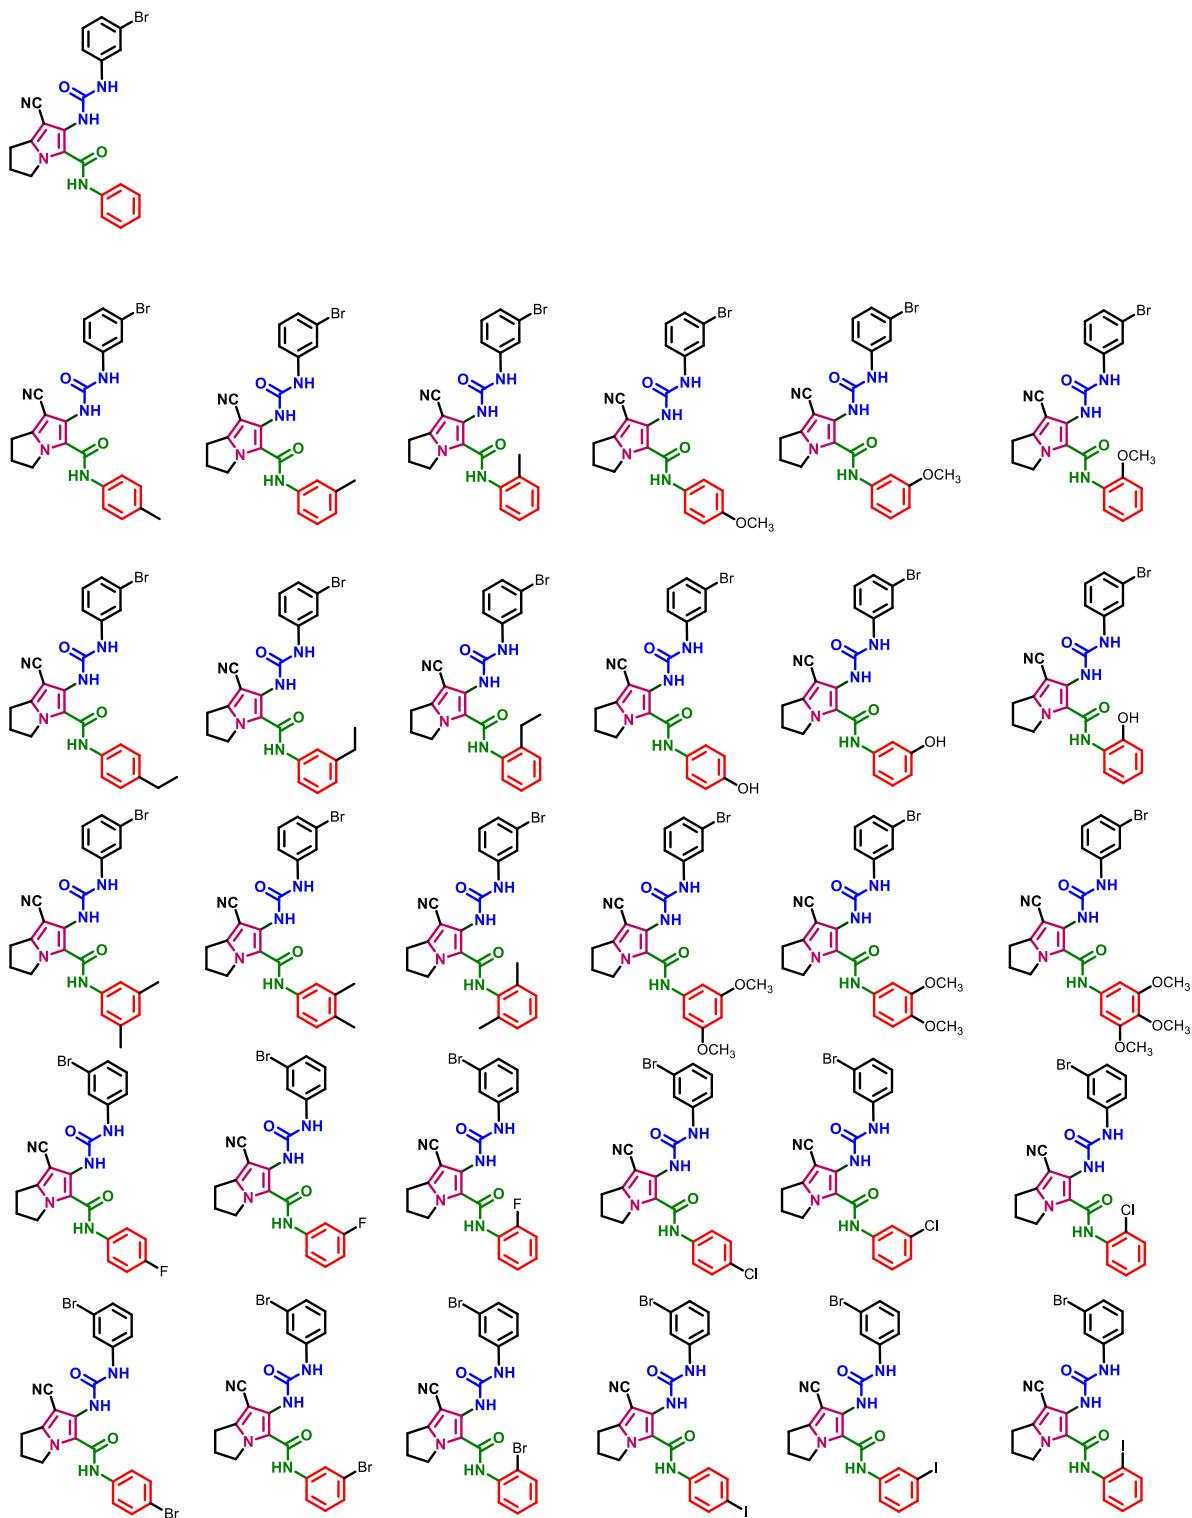

**Figure S27. Chemical structure of compound 807-837 (3bromophenyliso)**

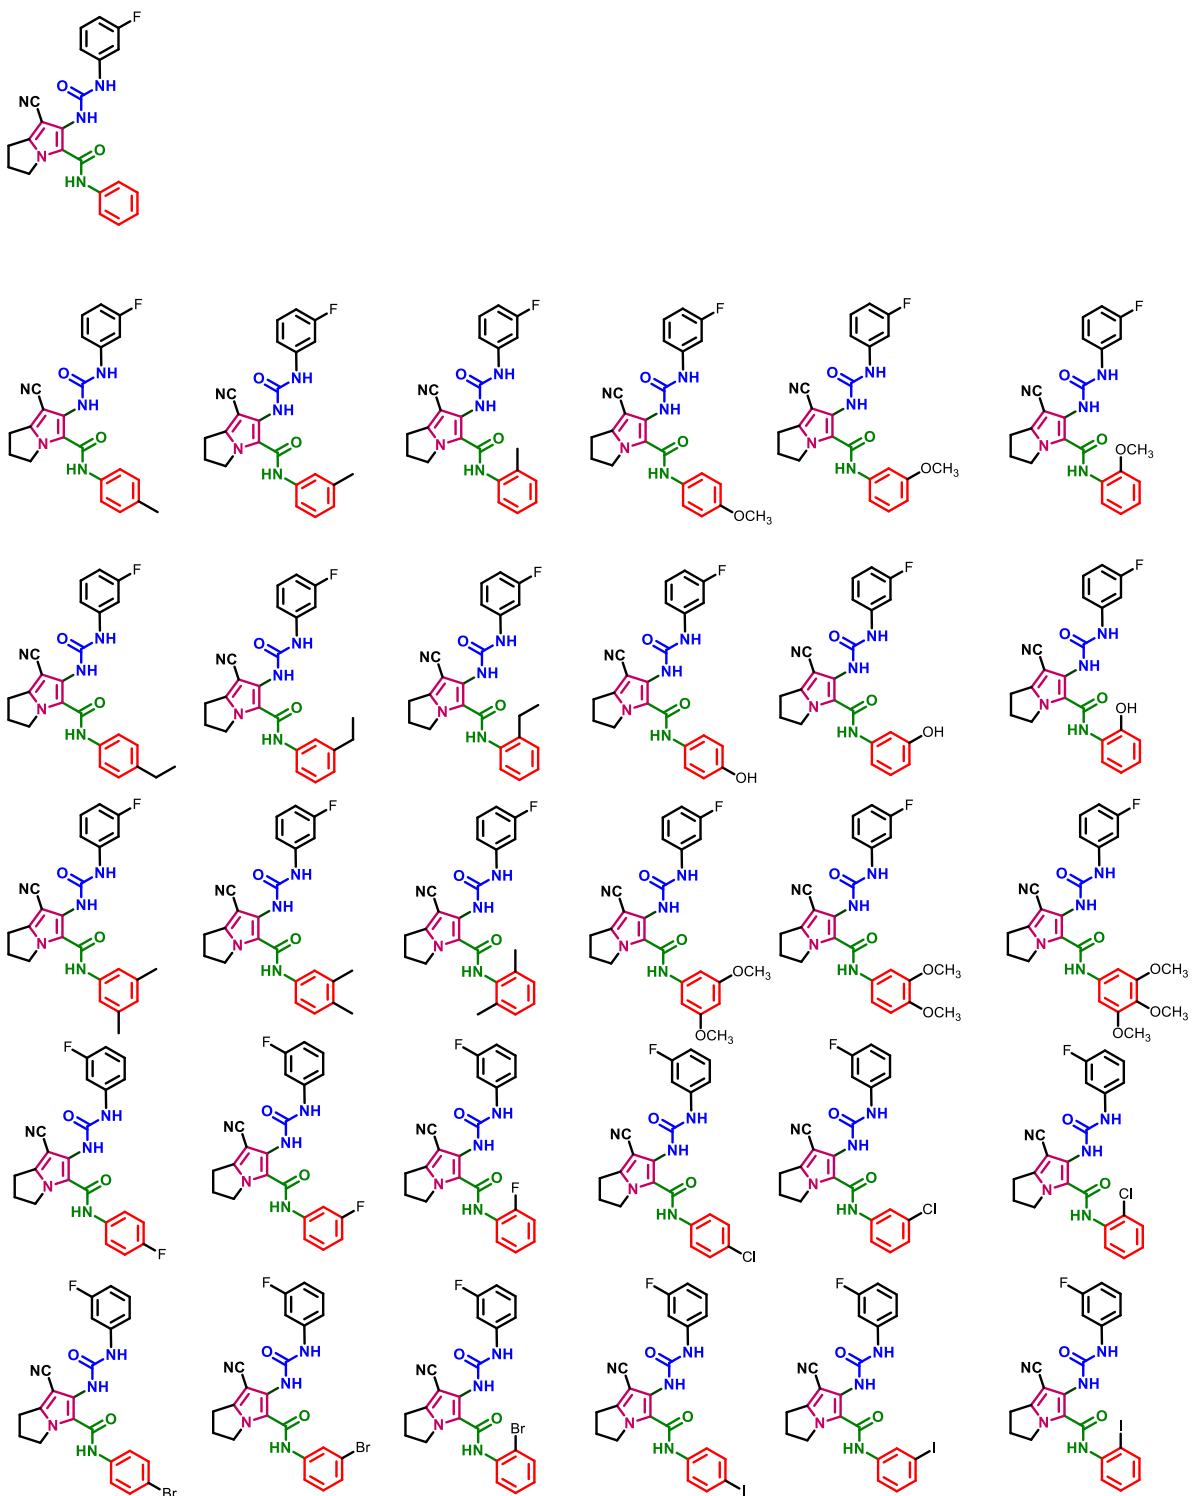

**Figure S28.** Chemical structure of compound 838-868 (3fluorophenyliso)

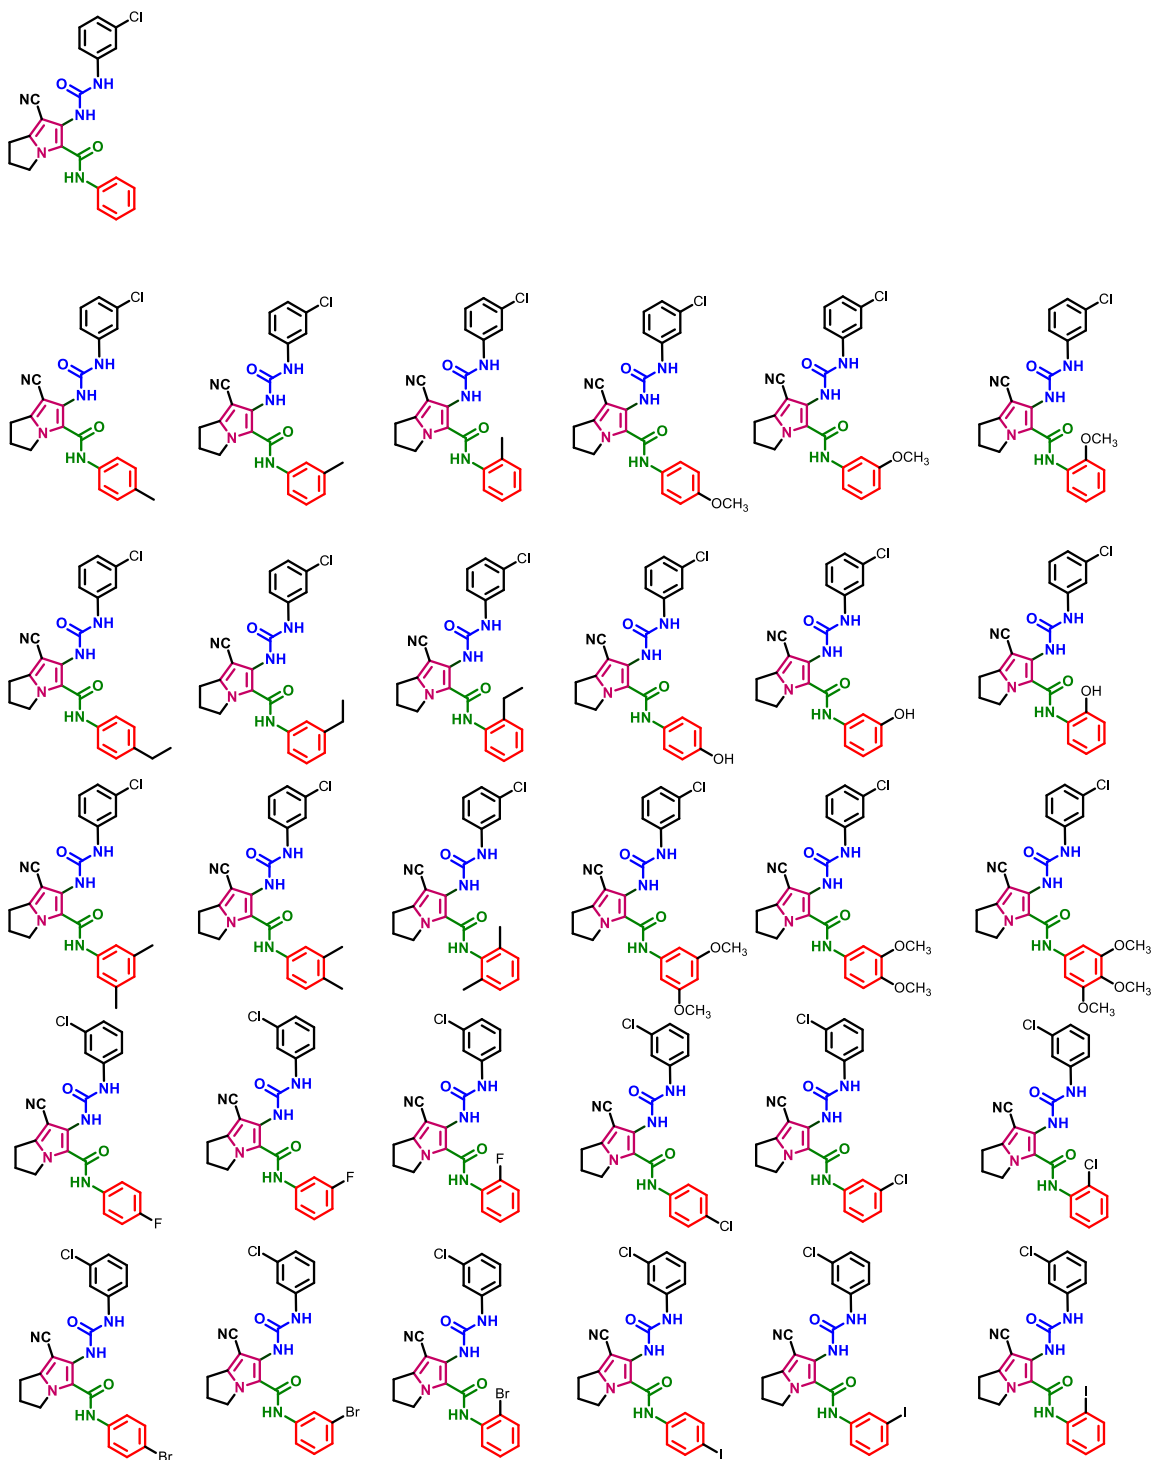

**Figure S29.** Chemical structure of compound 869-899 (3chlorophenyliso)

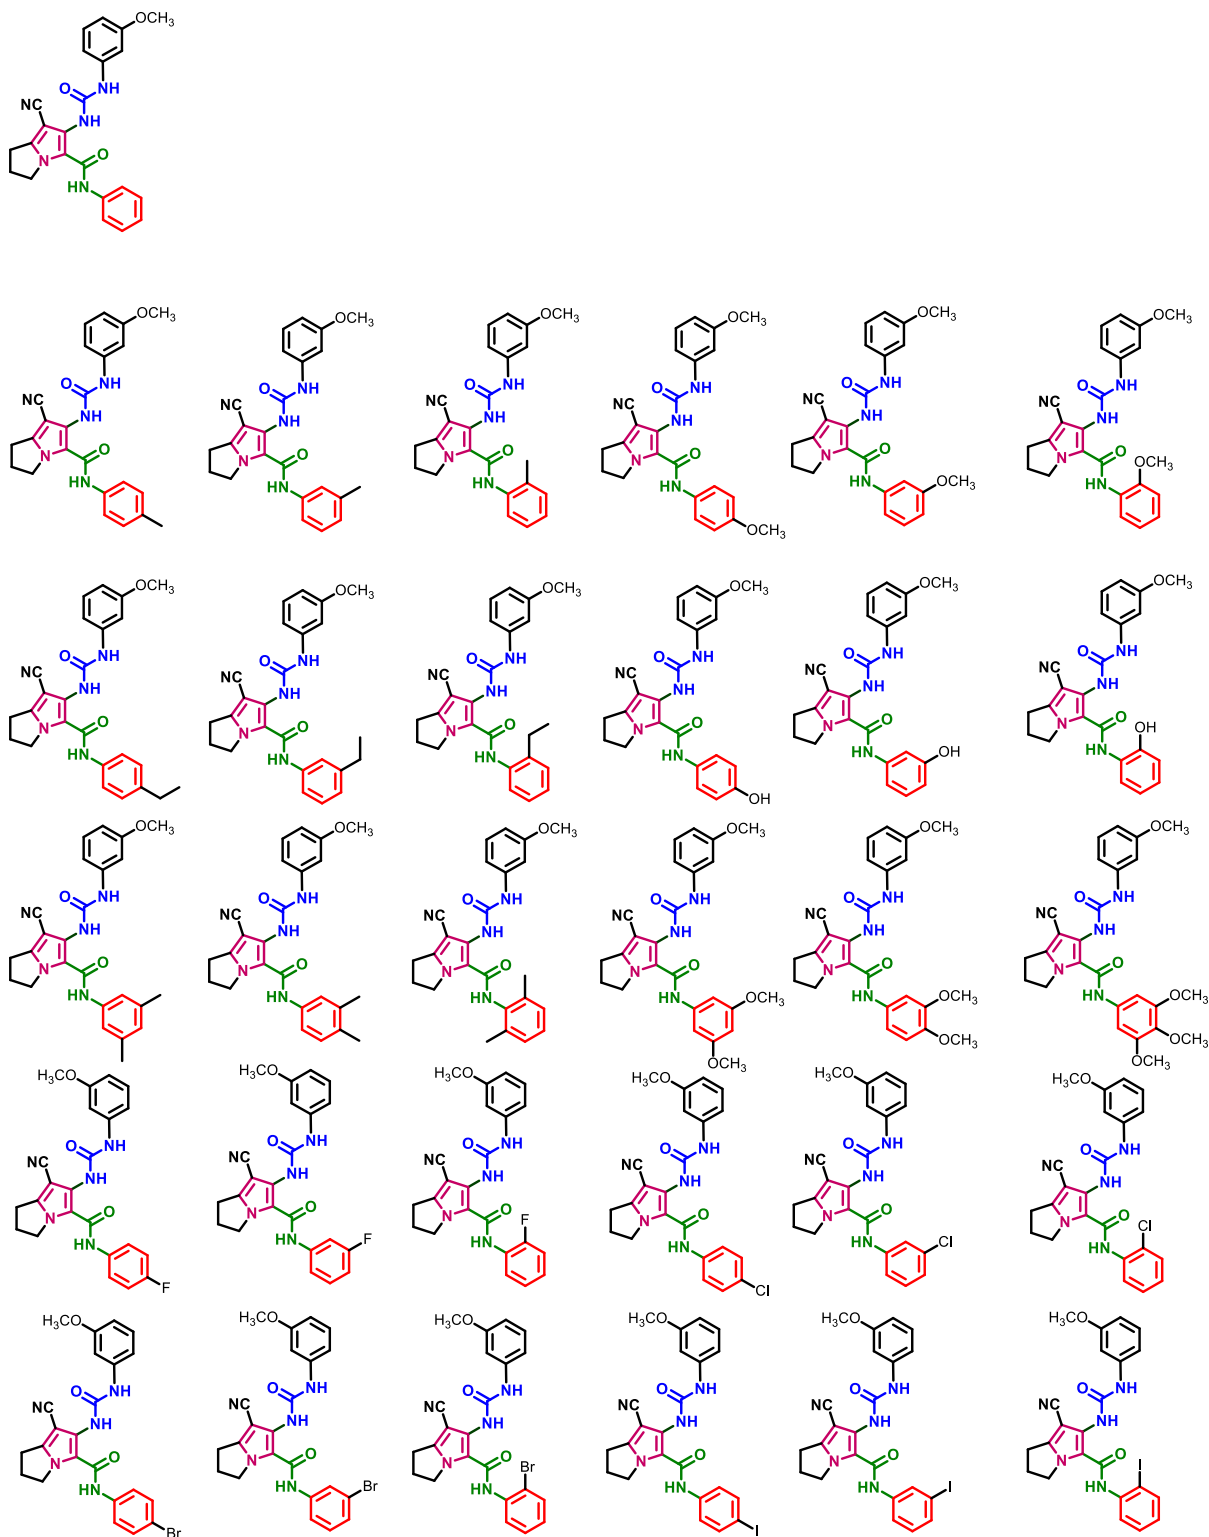

**Figure S30.** Chemical structure of compound 900-930 (3methoxyphenyliso)

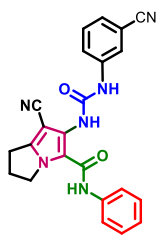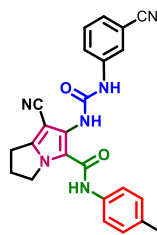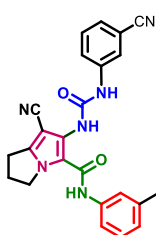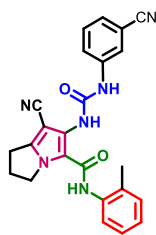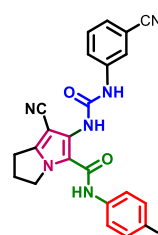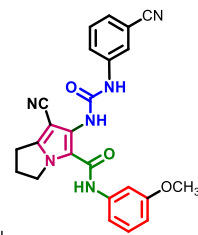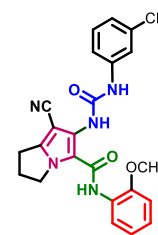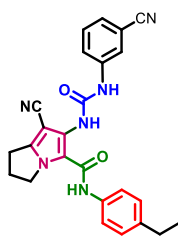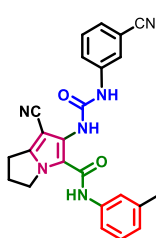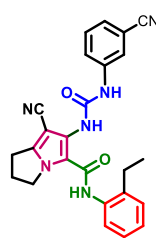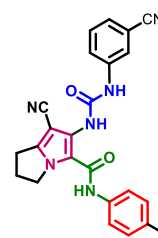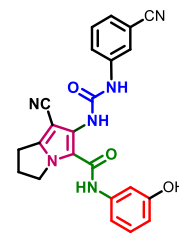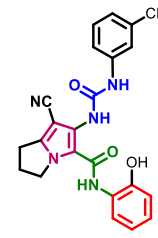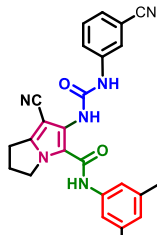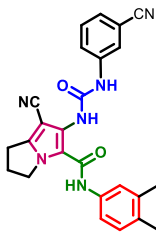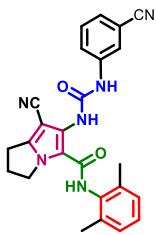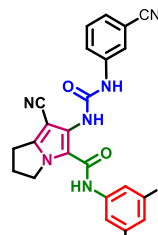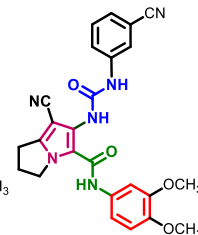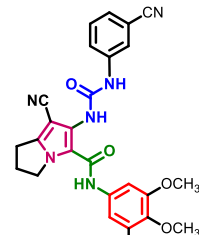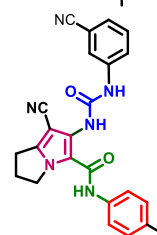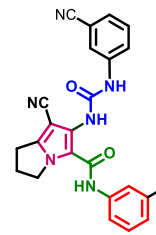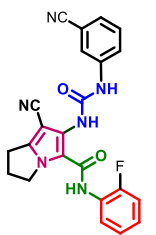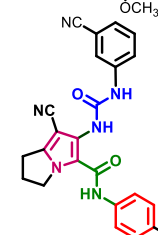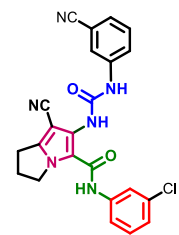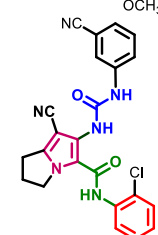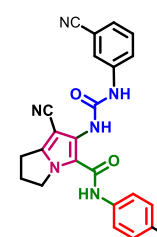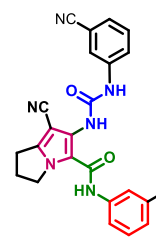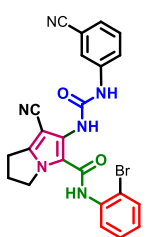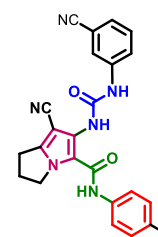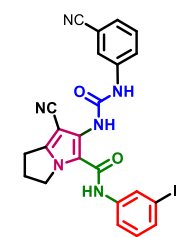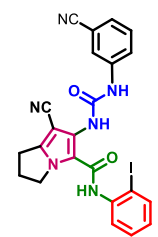

Figure S31. Chemical structure of compound 931-961 (3cyanophenyliso)

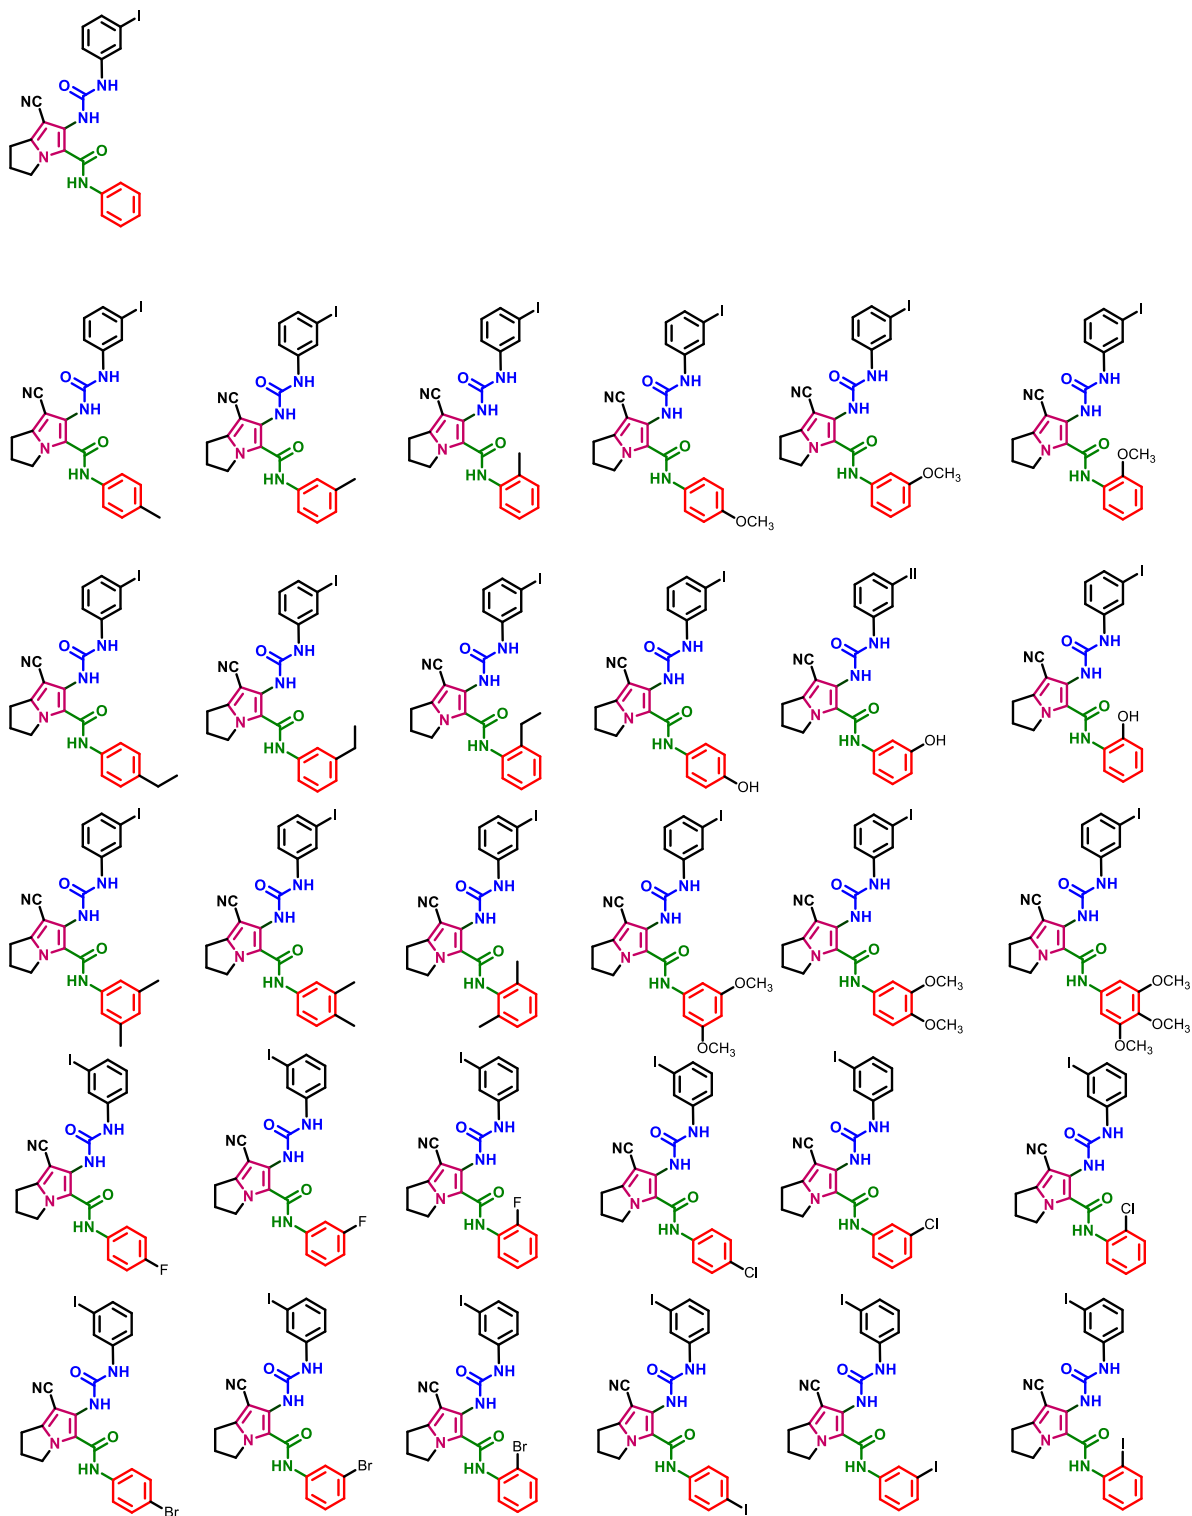

**Figure S32.** Chemical structure of compound 962-992 (3iodophenyliso)

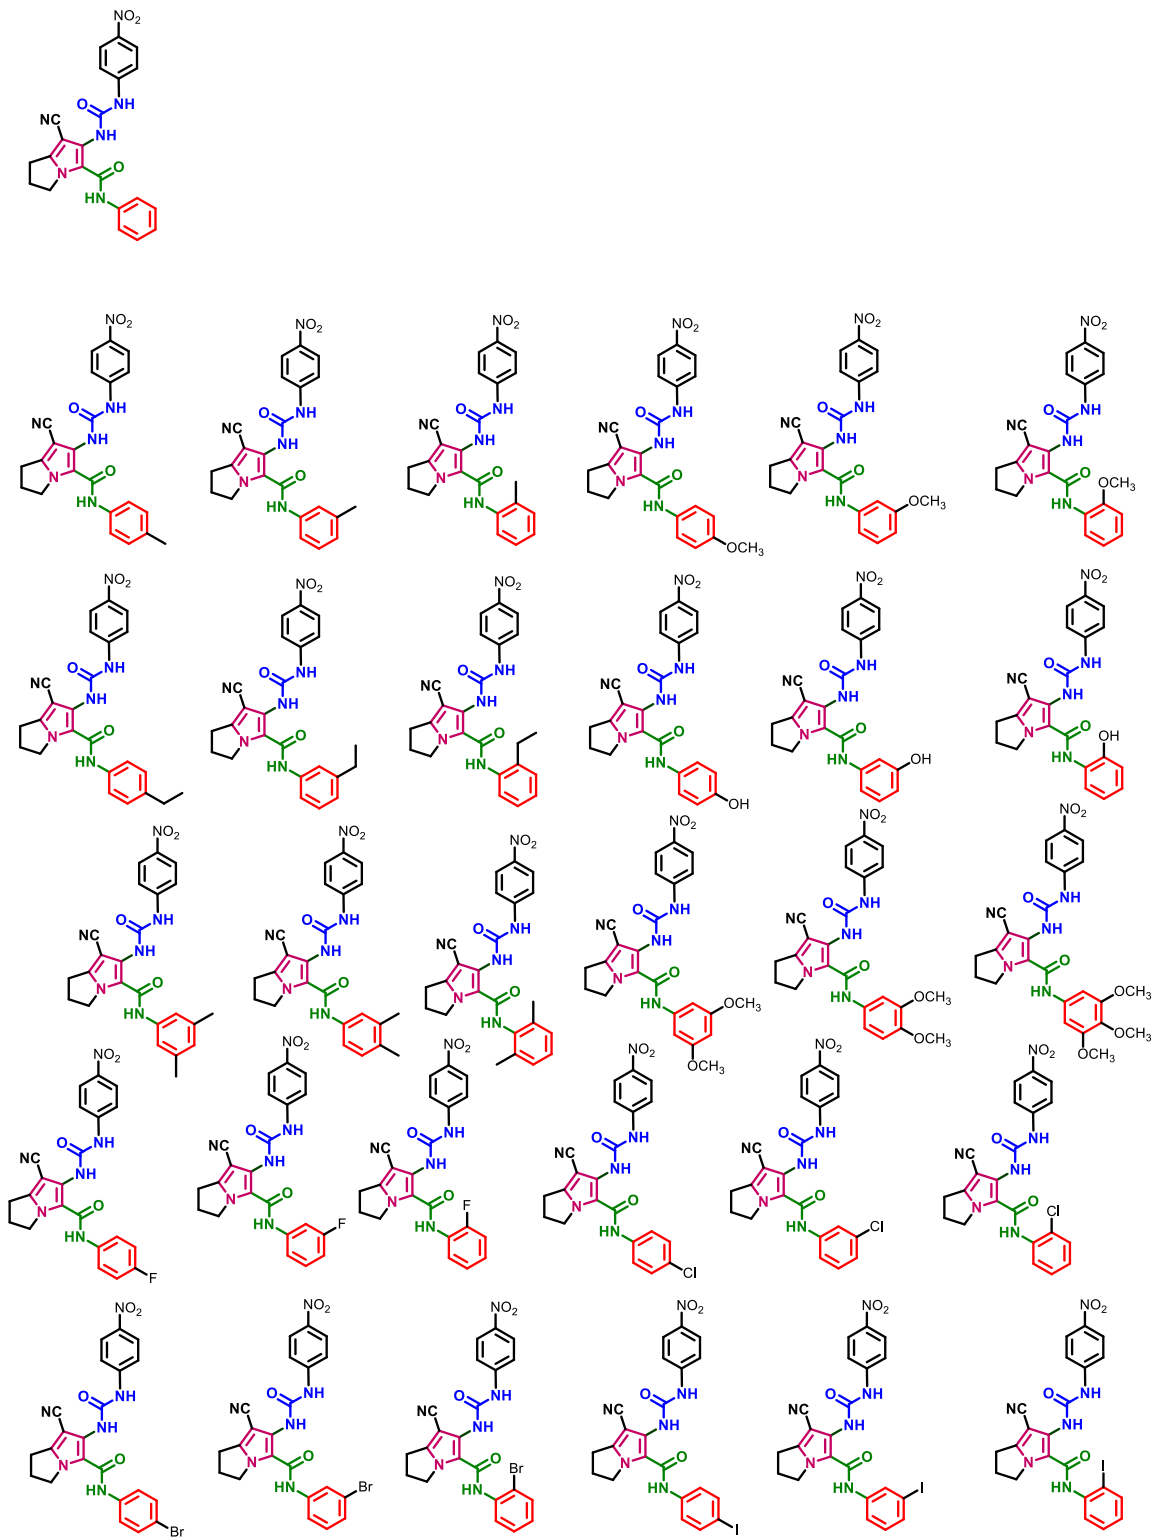

**Figure S33.** Chemical structure of compound 993-1023 (4nitrophenyliso)

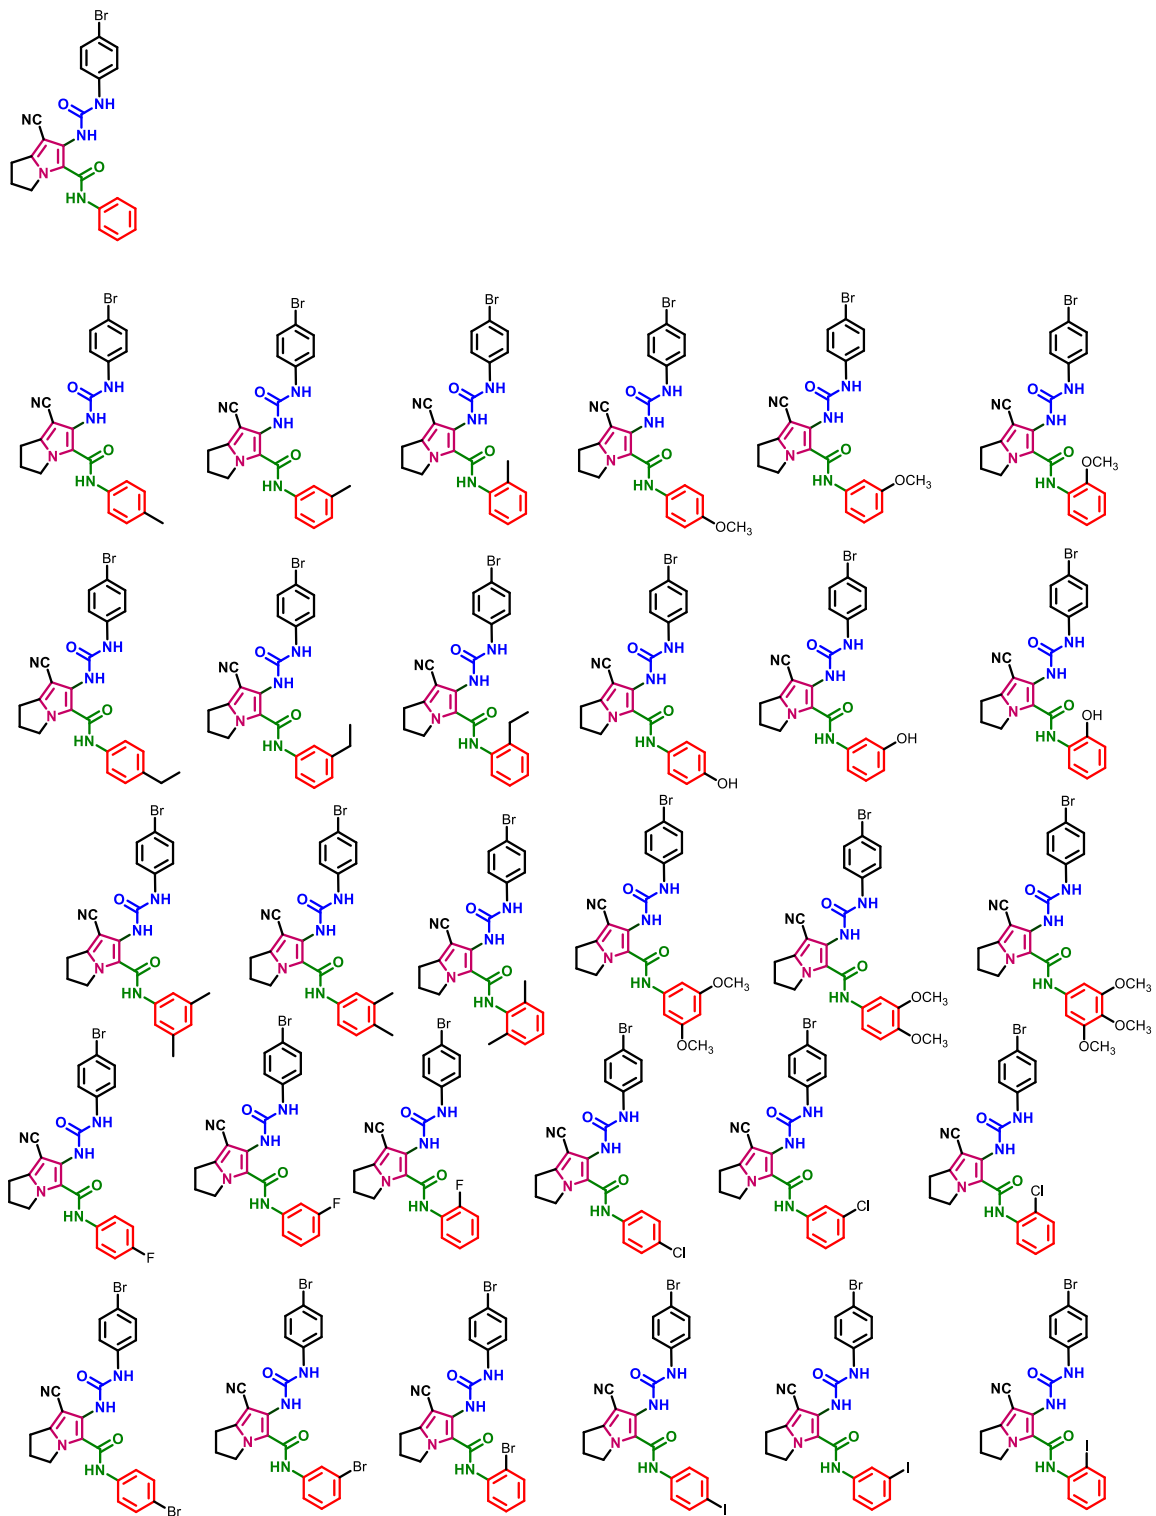

**Figure S34.** Chemical structure of compound 1024-1054 (4bromophenyliso)



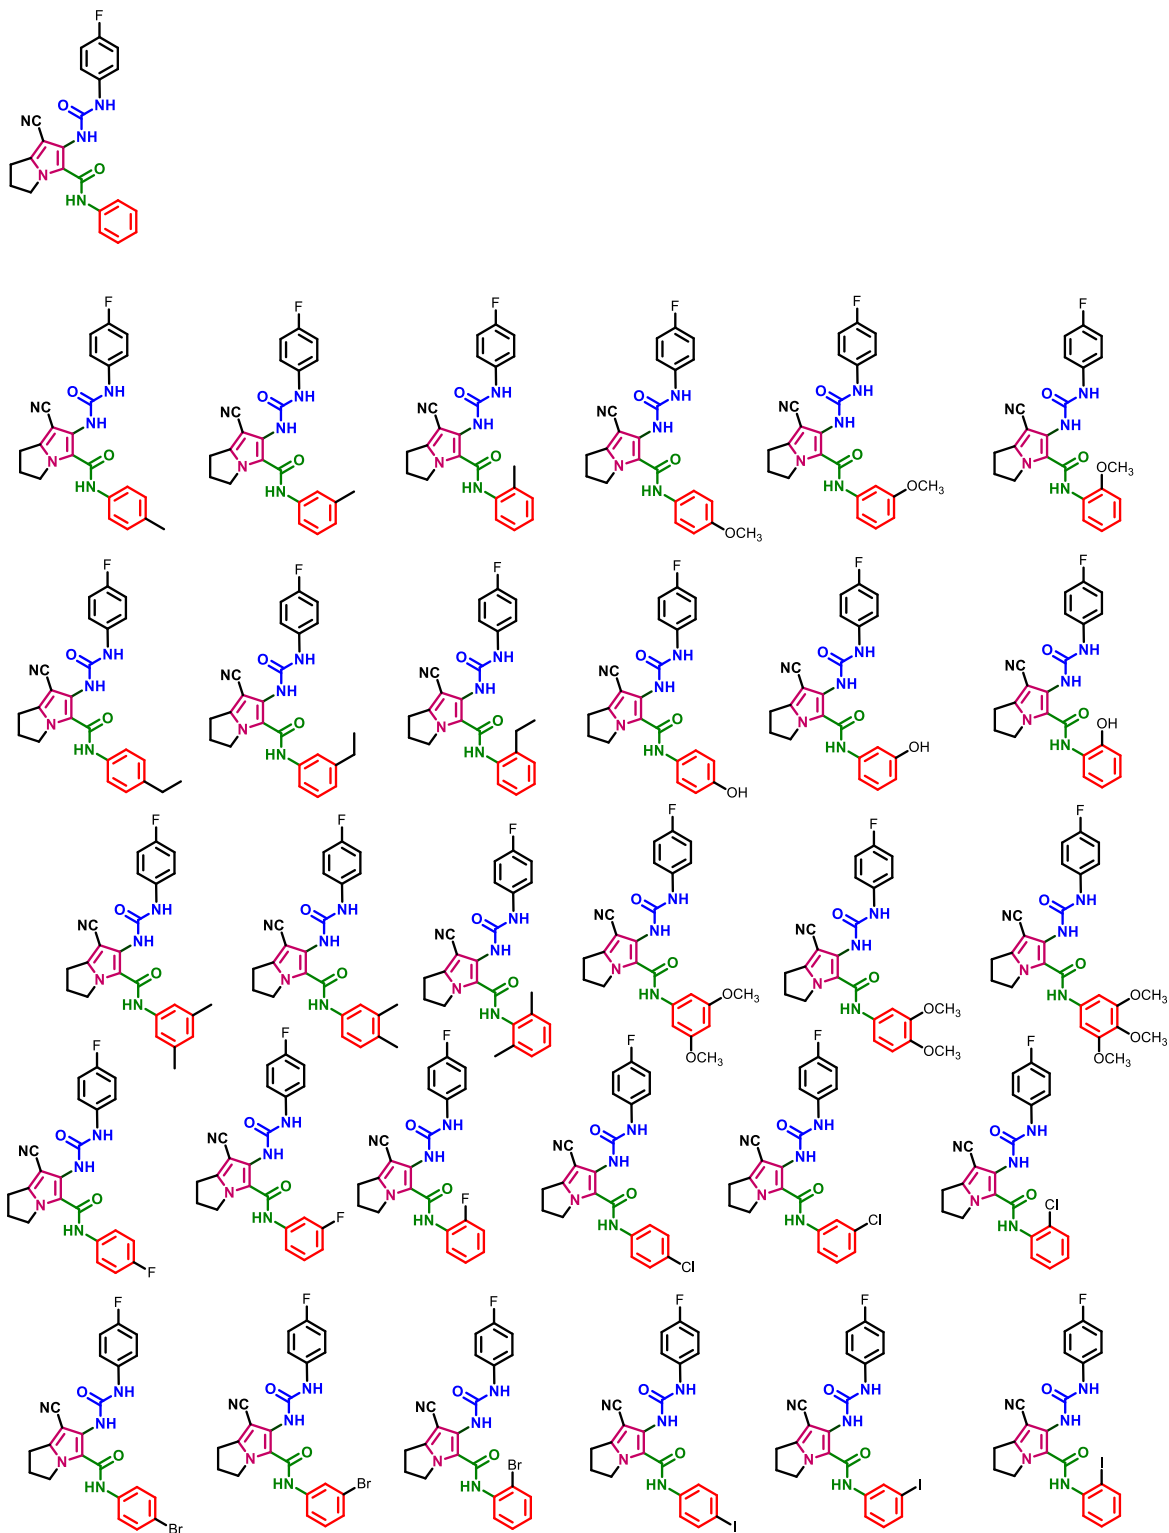

**Figure S35. Chemical structure of compound 1055-1085 (4fluorophenyliso)**

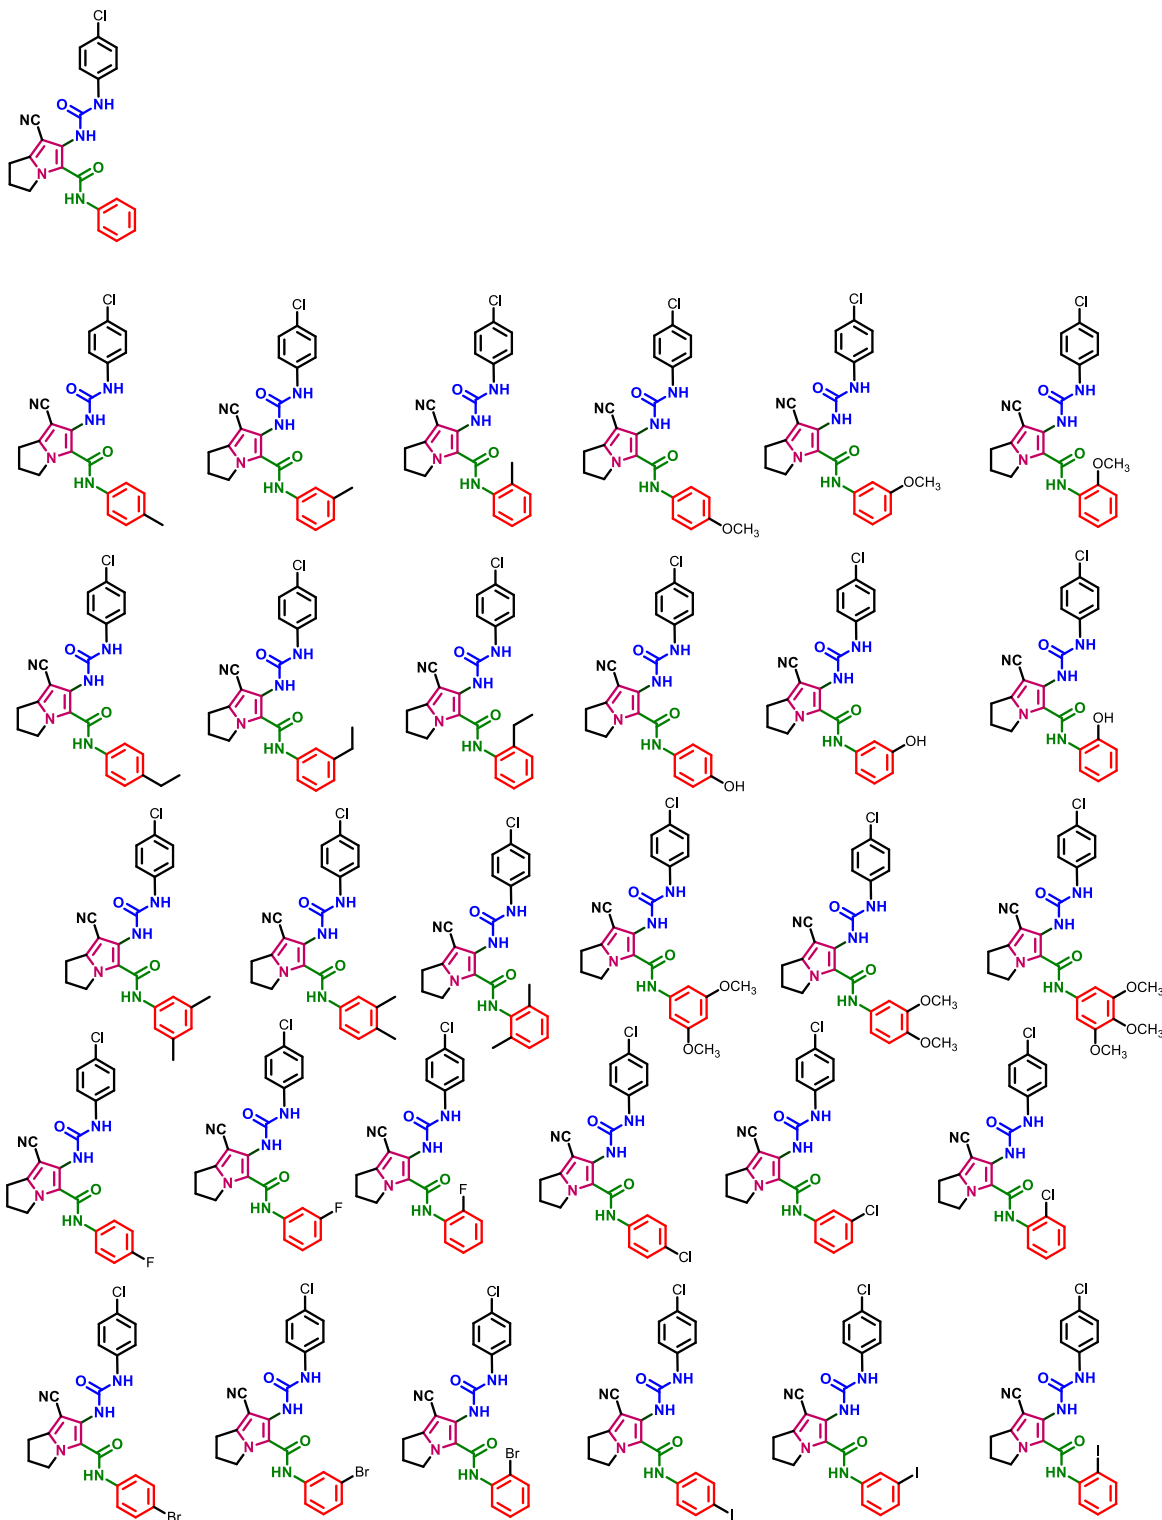

**Figure S36.** Chemical structure of compound 1086-1116 (4chlorophenyliso)

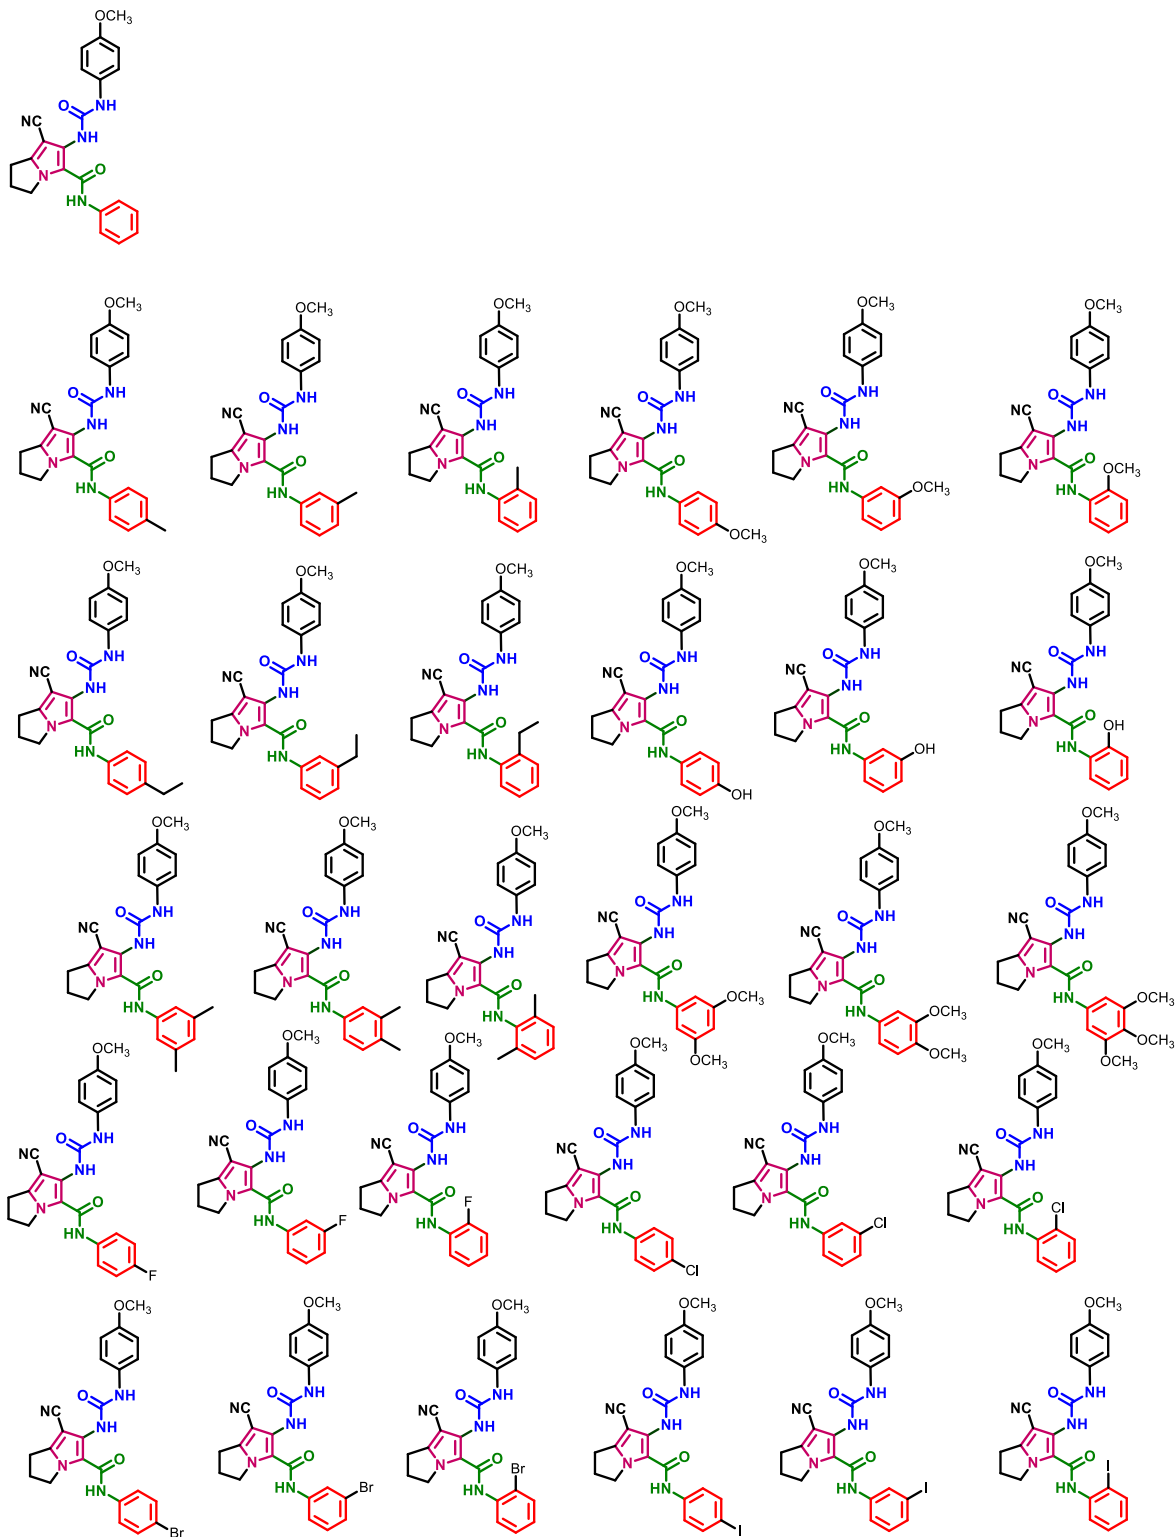

**Figure S37.** Chemical structure of compound 1117-1147 (4methoxyphenyliso)

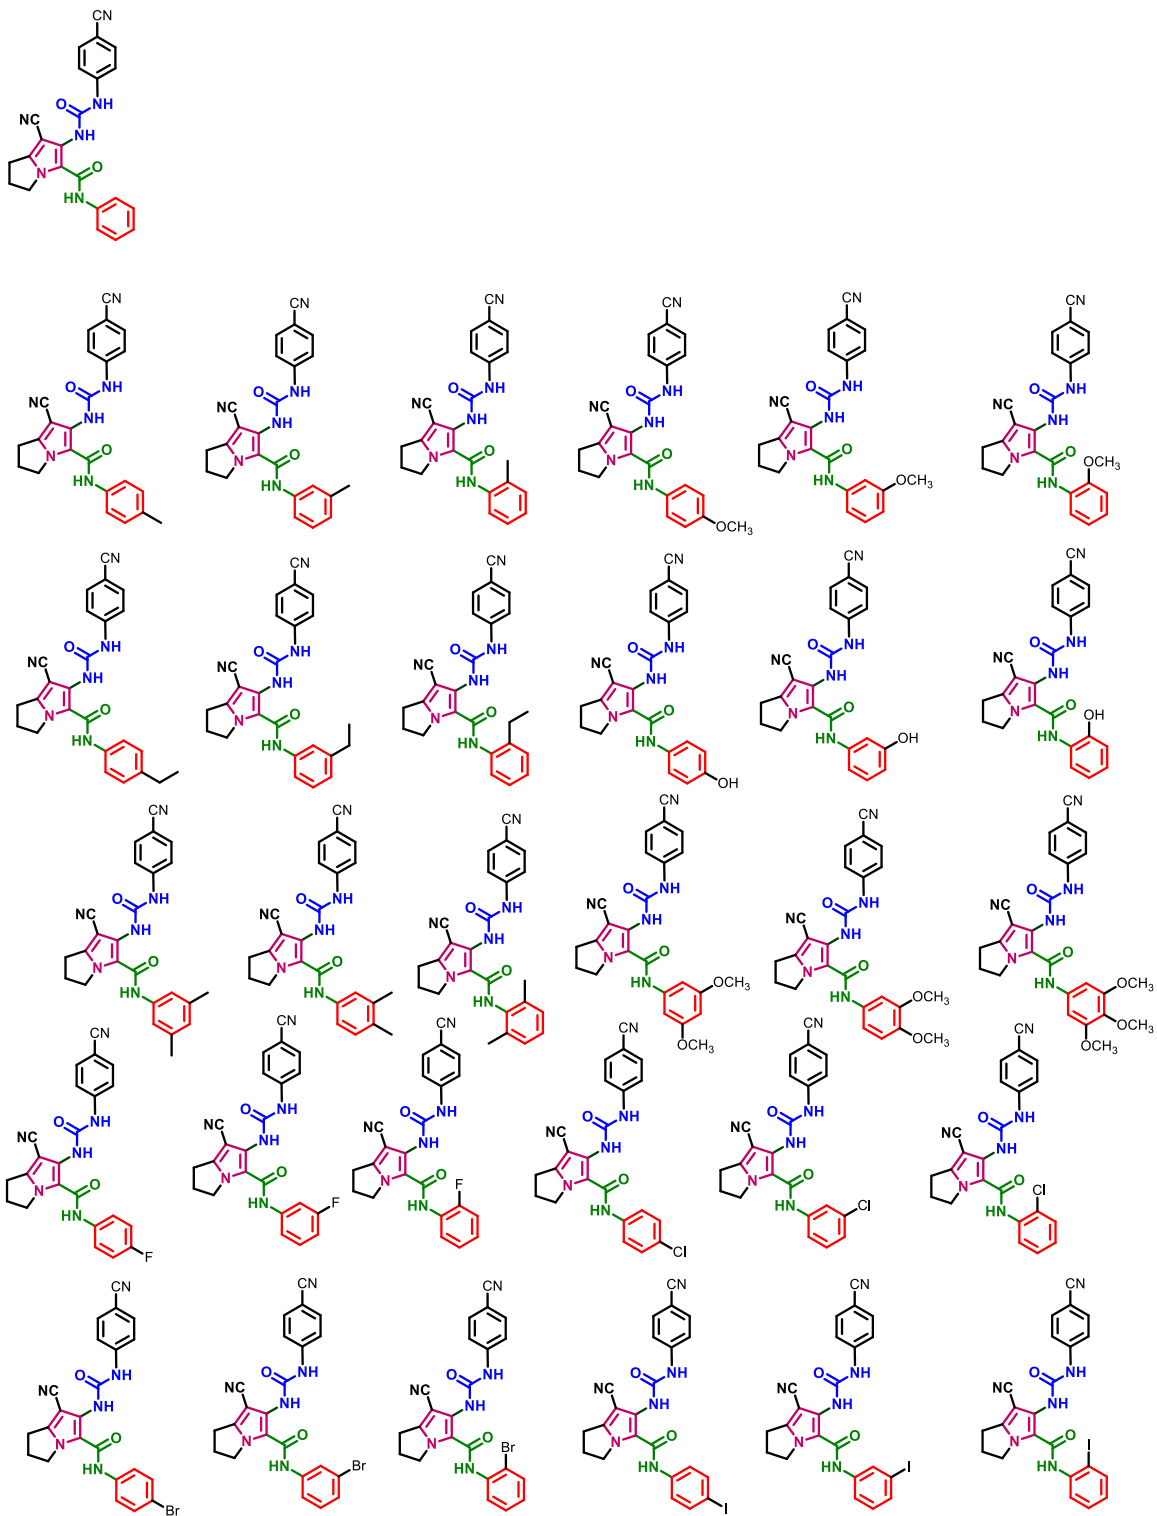

**Figure S38. Chemical structure of compound 1148-1178 (4cyanophenyliso)**

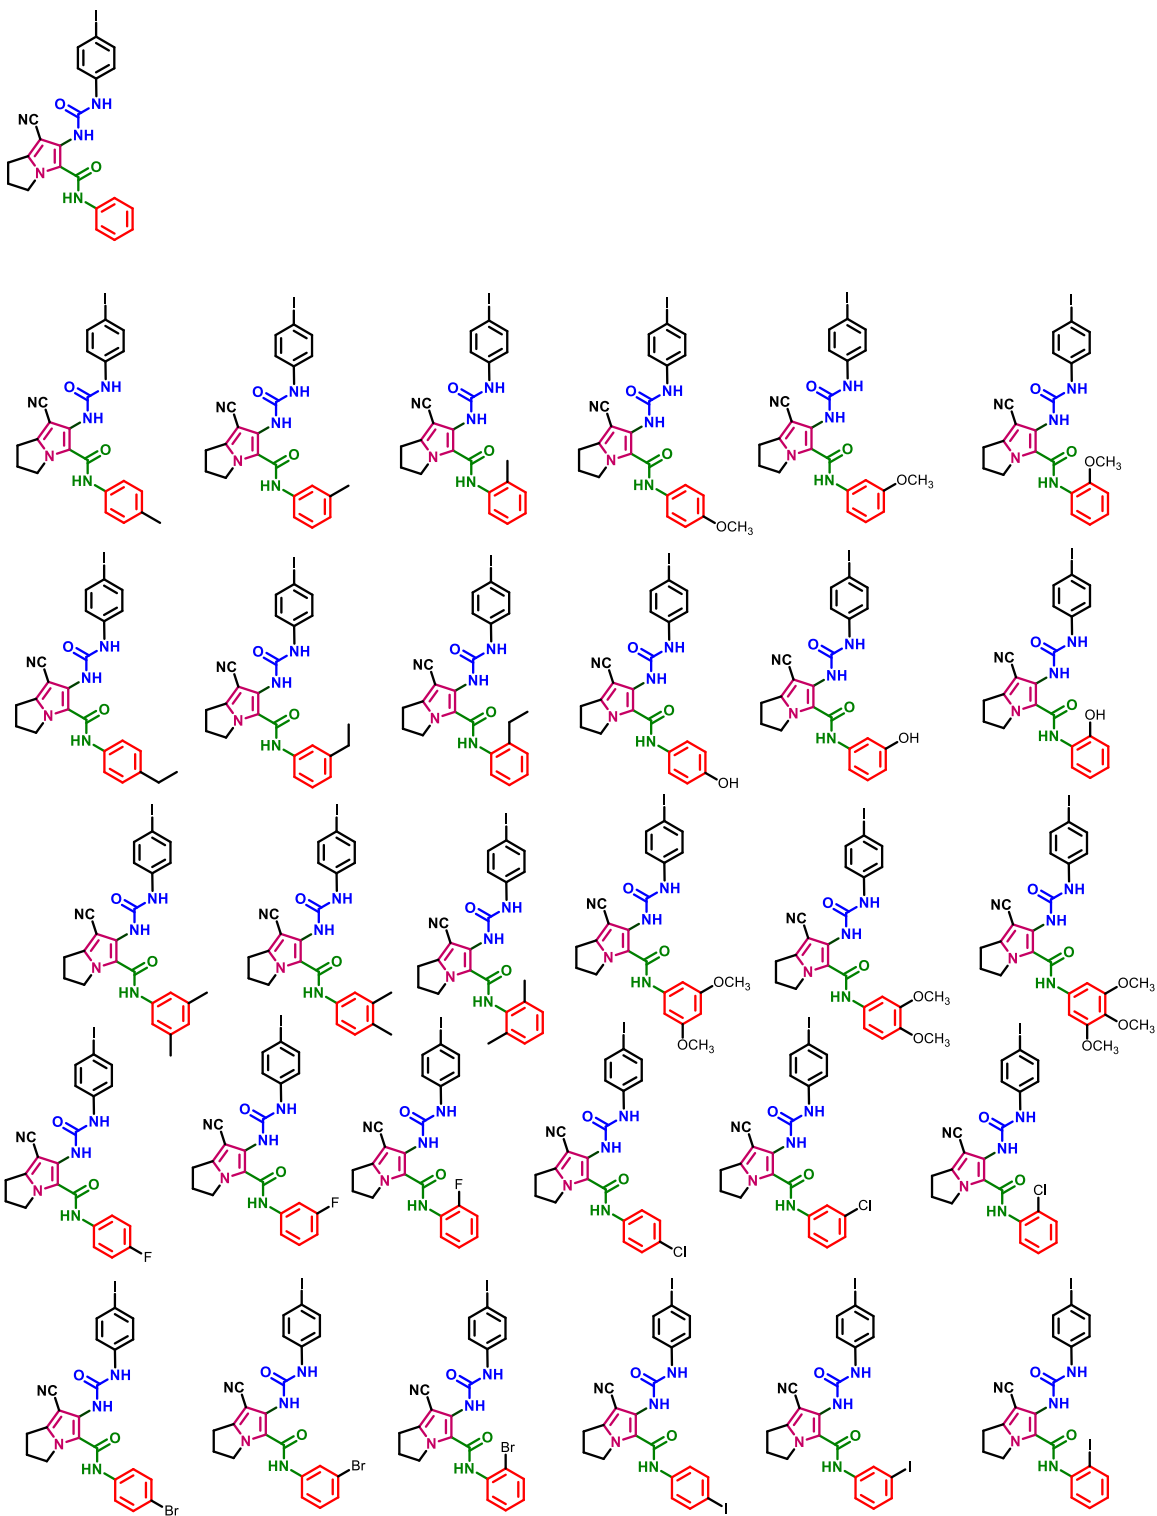

**Figure S39. Chemical structure of compound 1179-1209 (4iodophenyliso)**

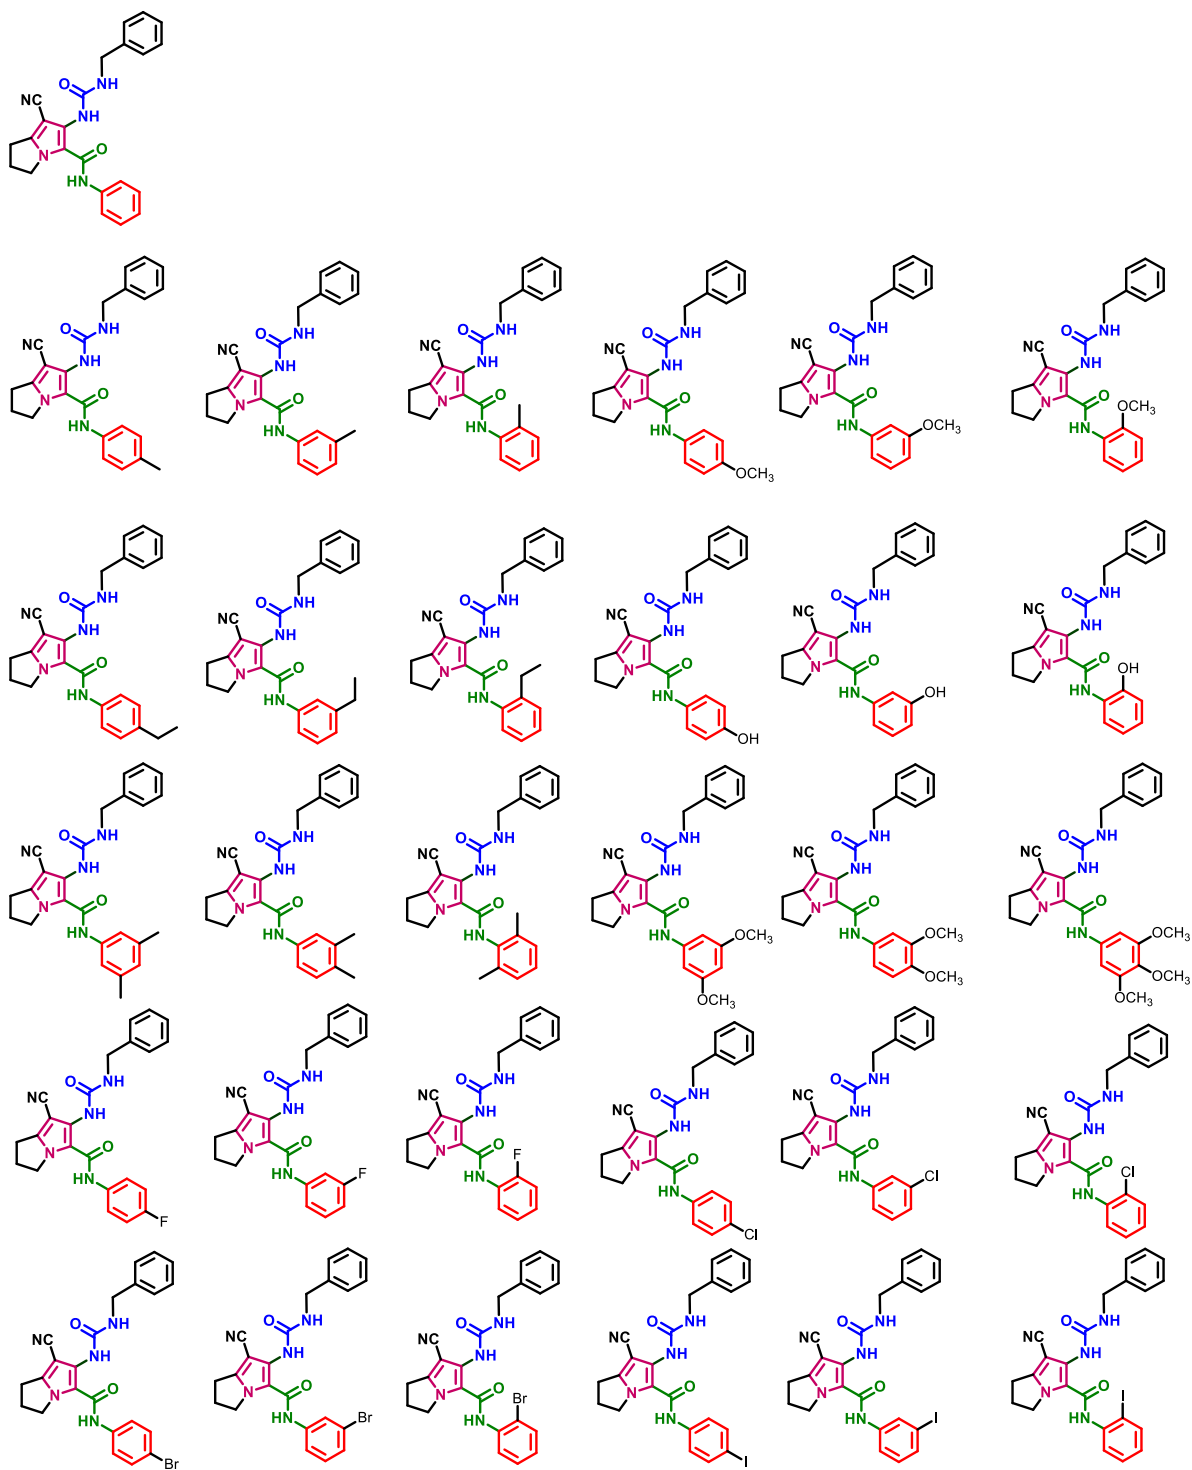

**Figure S40.** Chemical structure of compound 1210-1240 (benzyliso)

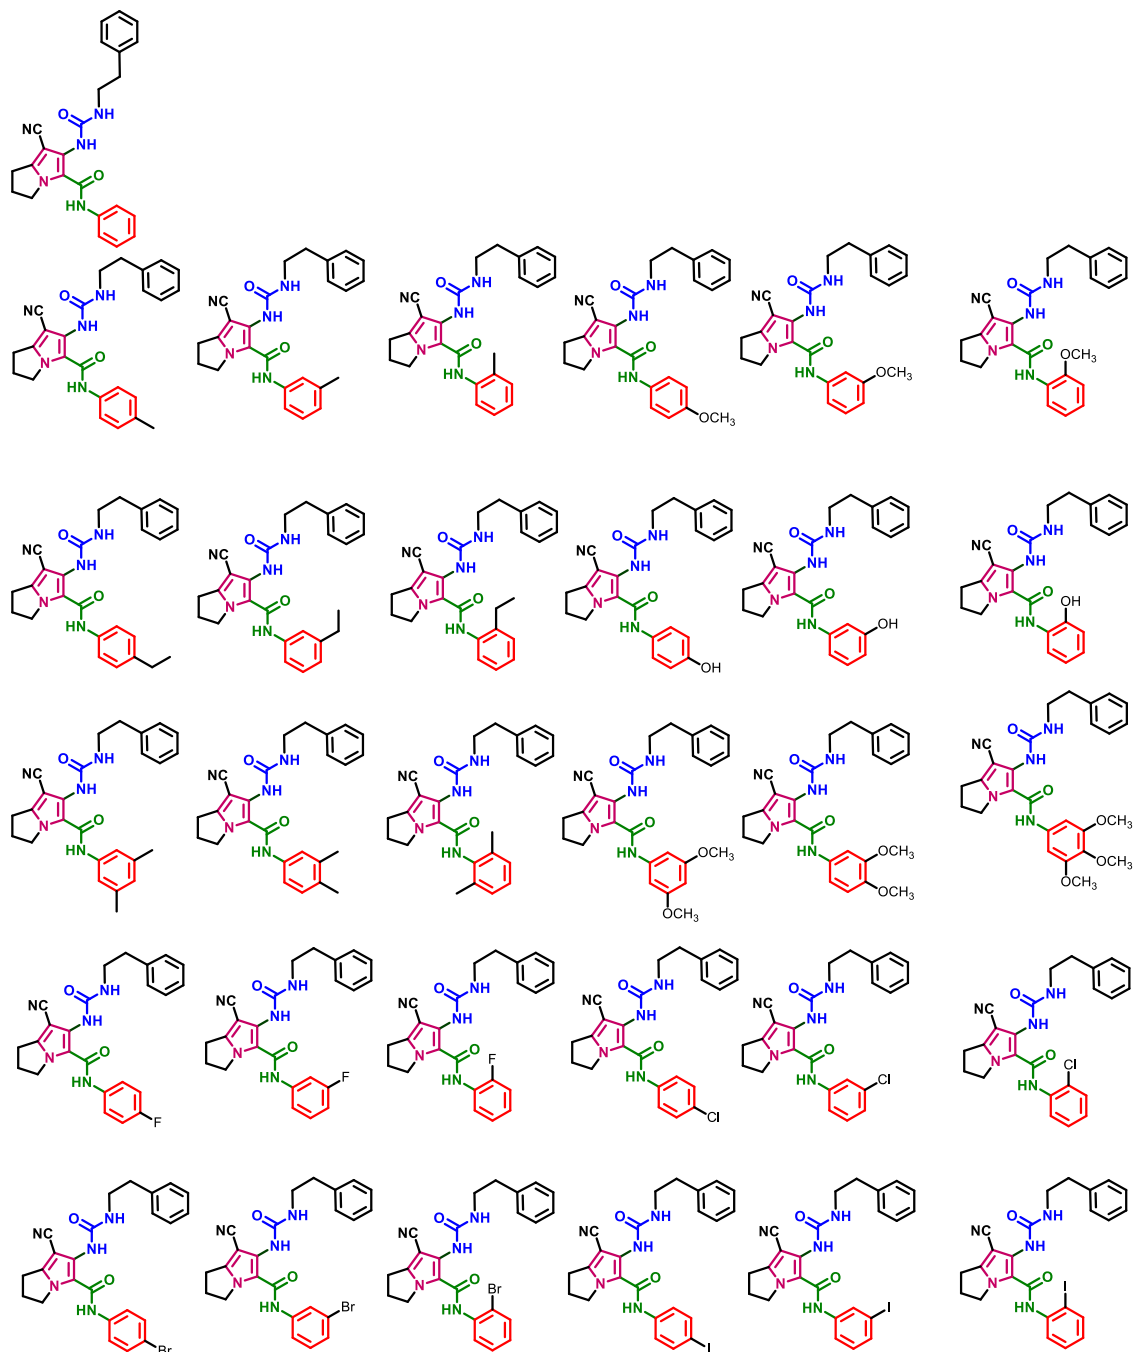

**Figure S41.** Chemical structure of compound 1241-1271 (phenylethyl)

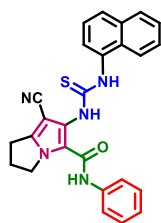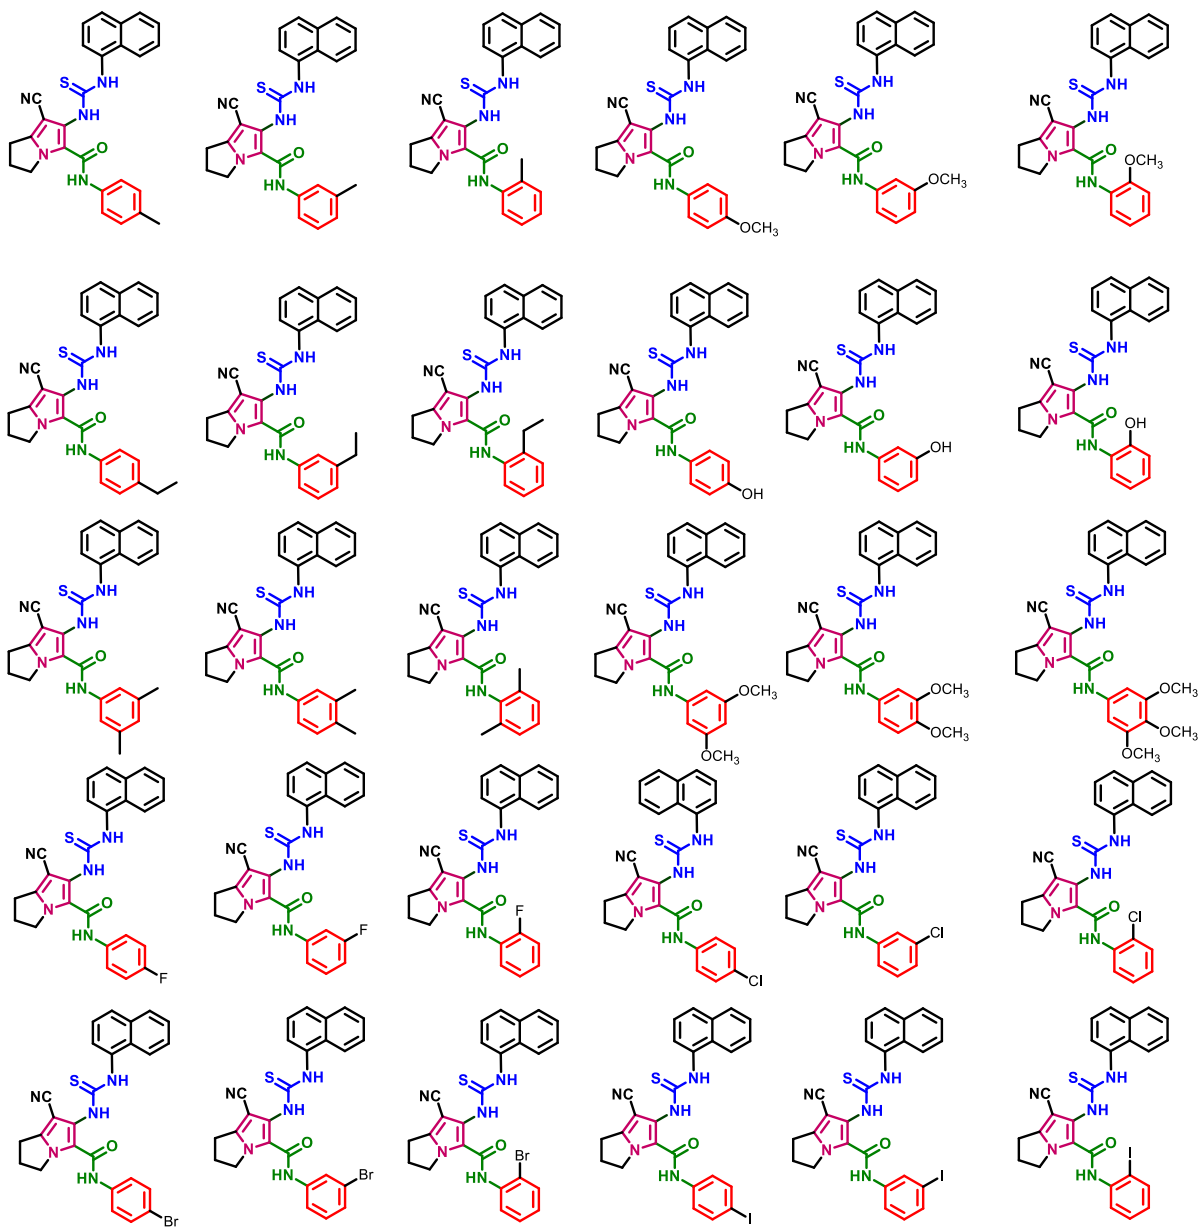

**Figure S42.** Chemical structure of compound 1272-1302 (phenylethyl)



## **IR Spectra**

Infrared spectra (IR) were done using BRUKER TENSOR 37 spectrophotometer and absorption were expressed in wave number ( $\text{cm}^{-1}$ ) using KBr Disk.

Figure S43. IR spectrum of compound 16a

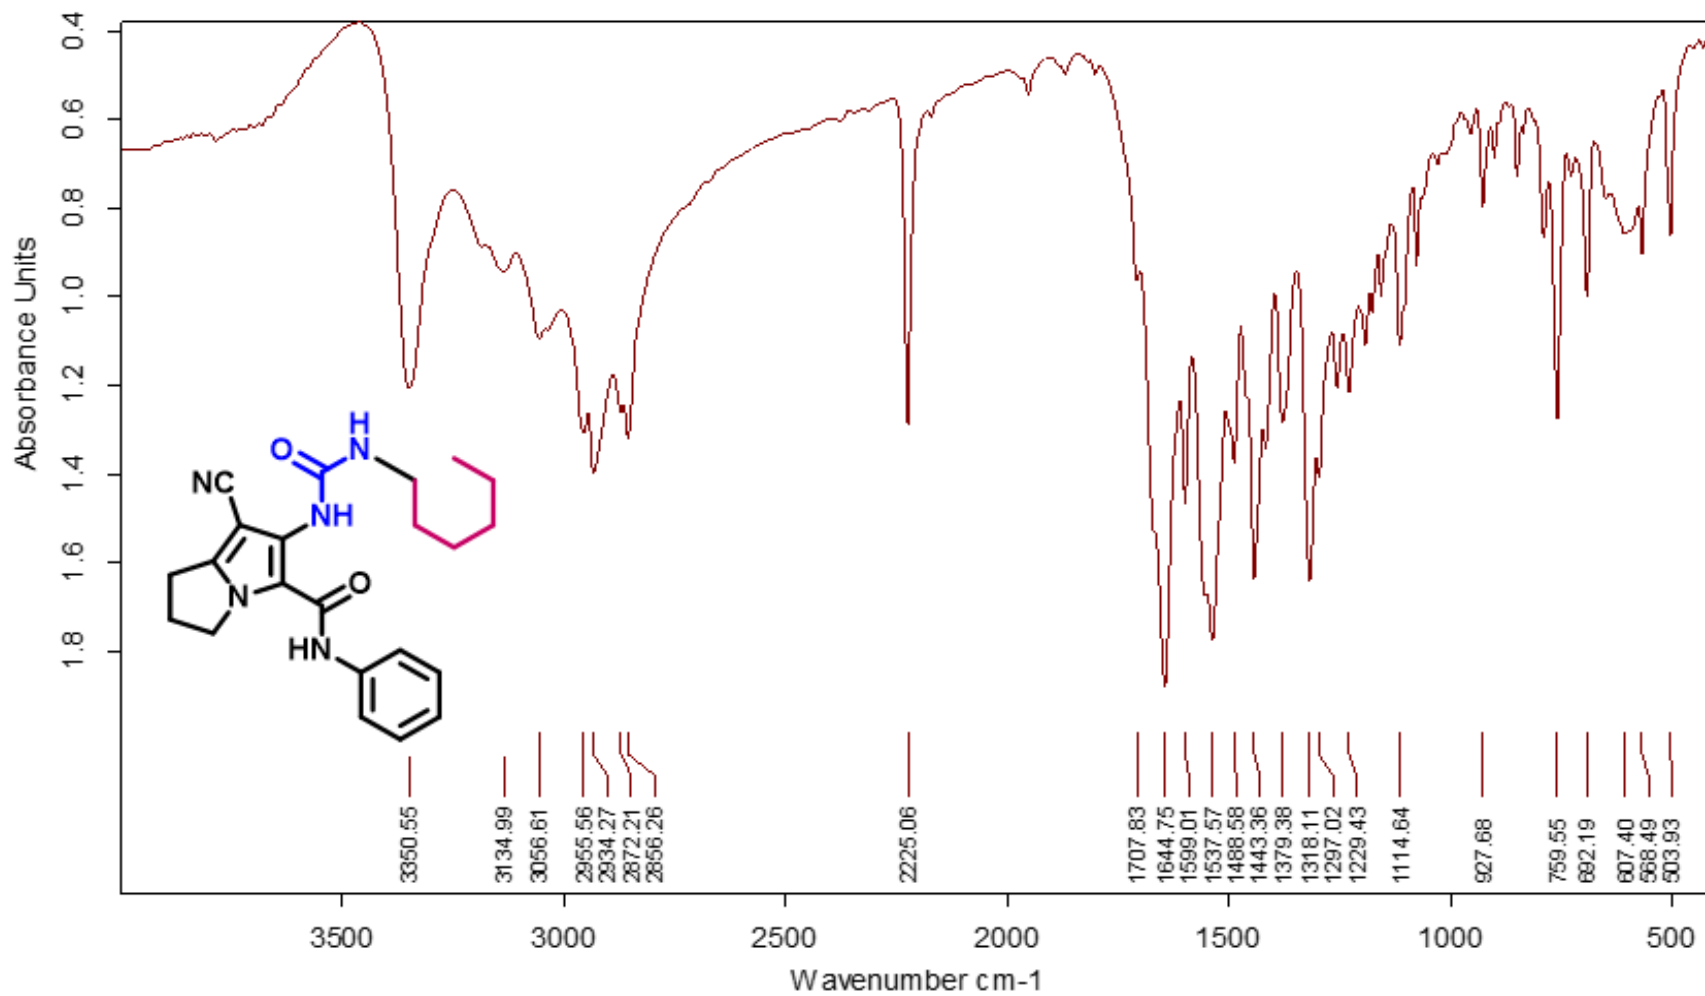

C:\Program Files\OPUS\_65MEAS\Protein.247

Protein

AquaSpec

31/01/2018

Figure S44. IR spectrum of compound 16b

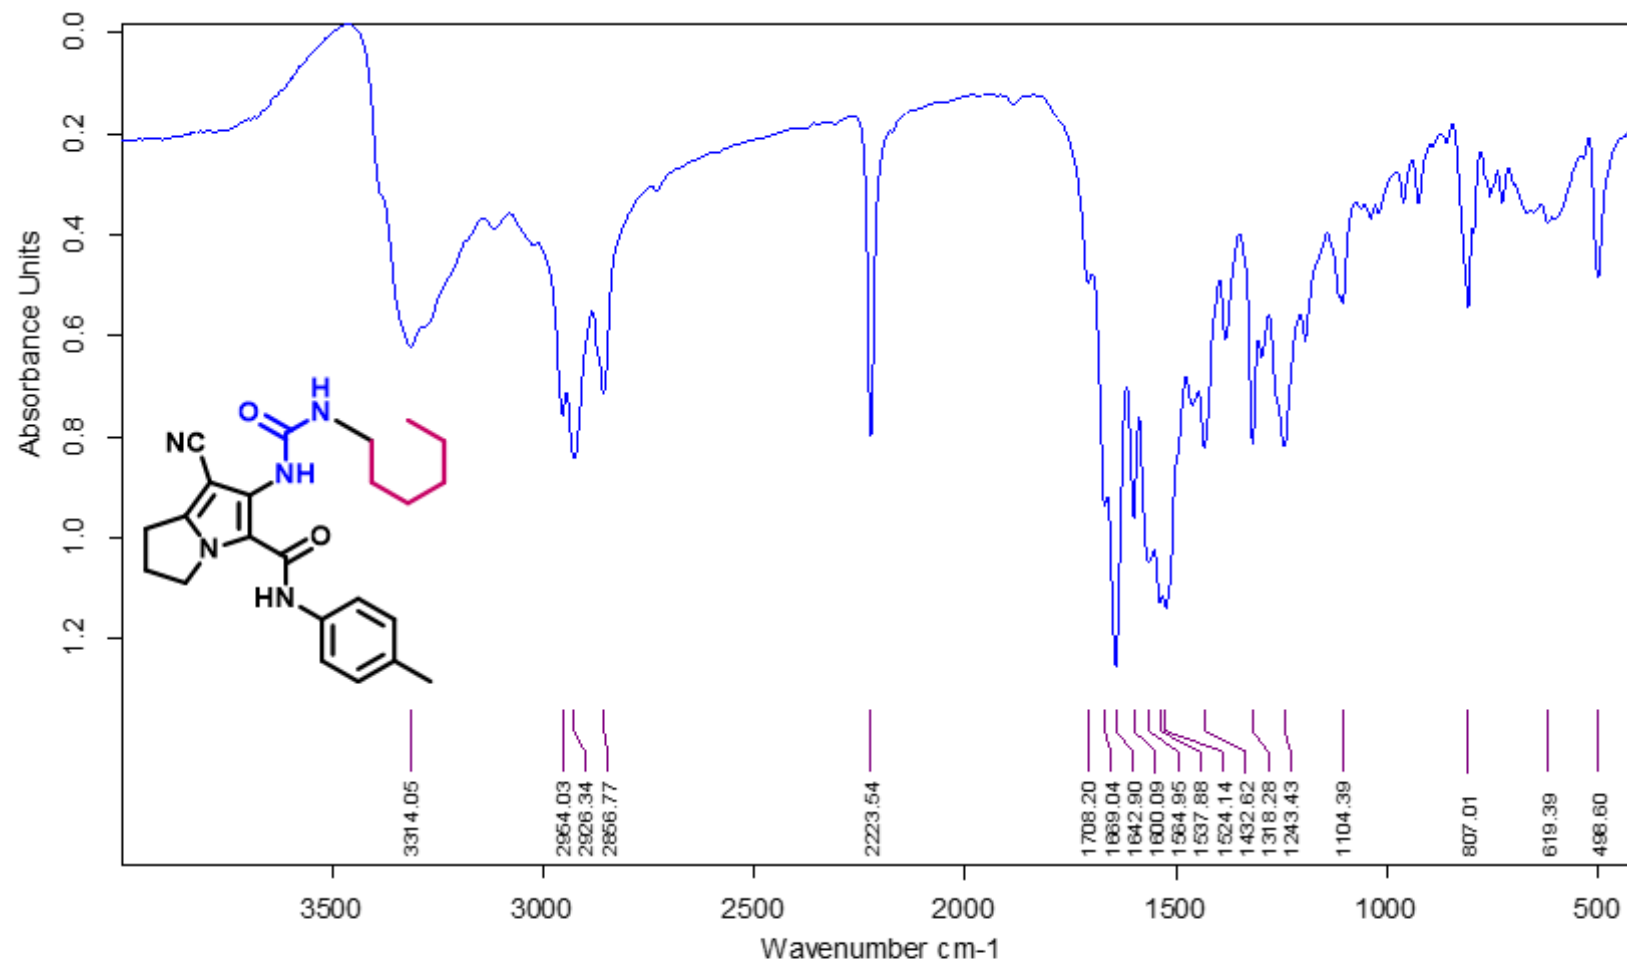

C:\Program Files\OPUS\_85\MEAS\Protein.248

Protein

AquaSpec

31/01/2018

Figure S45. IR spectrum of compound 16c

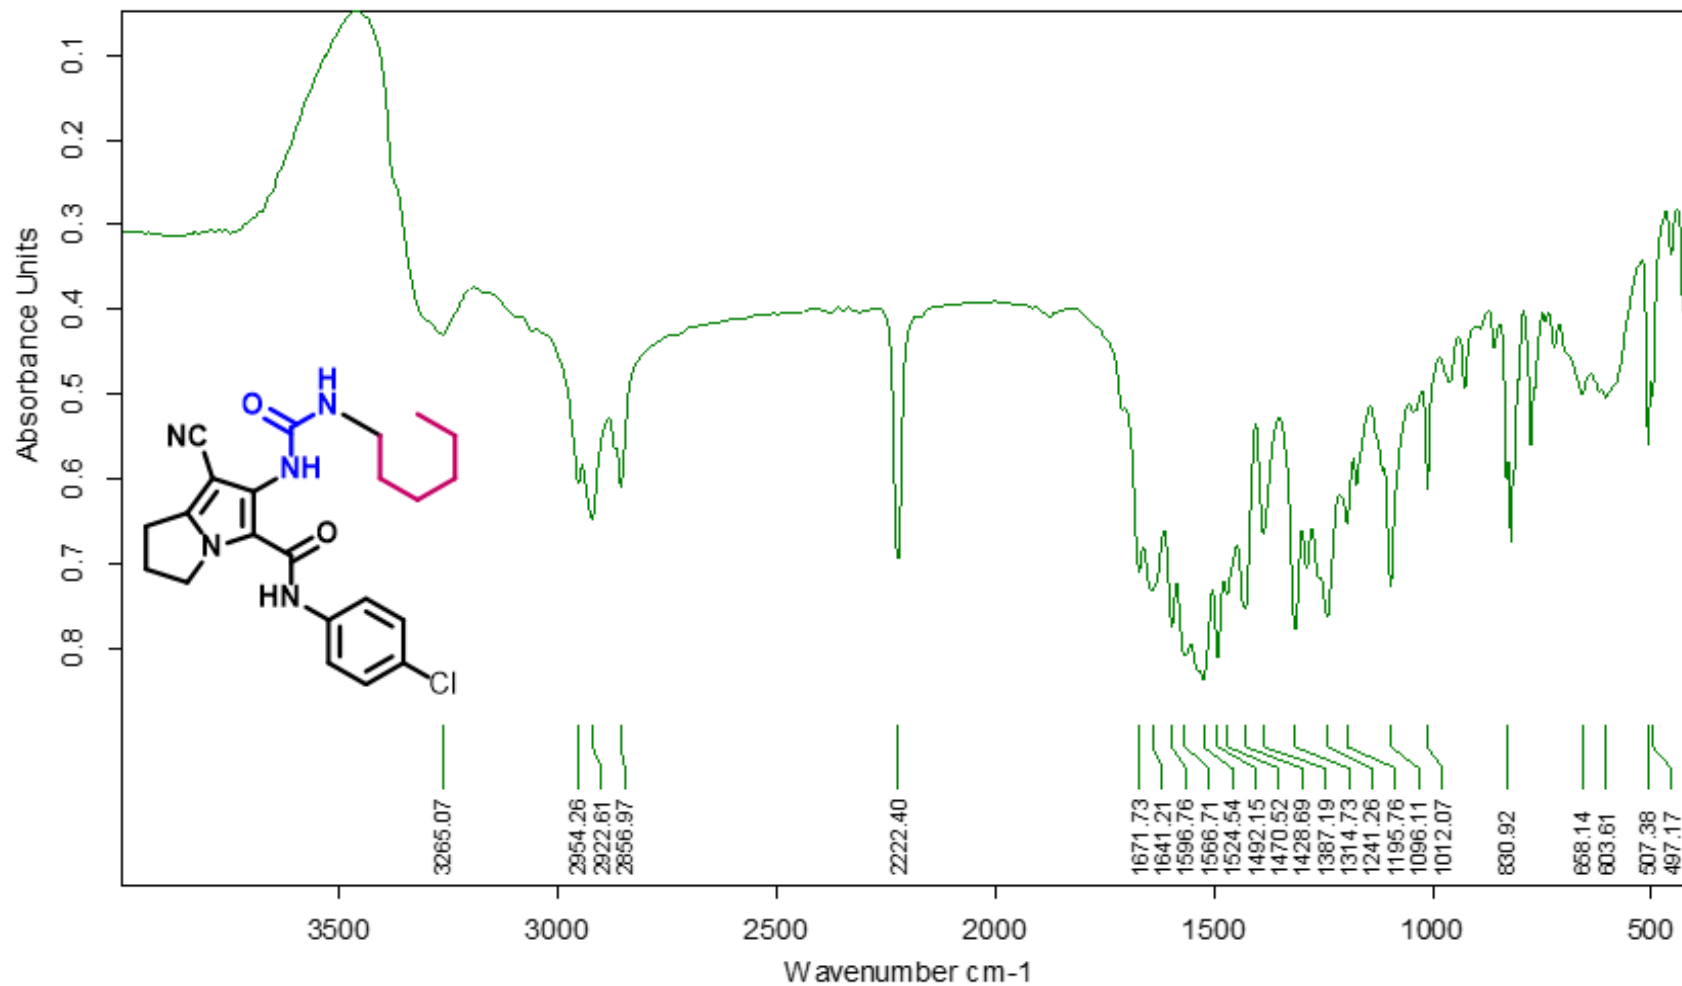

C:\Program Files\OPUS\_65MEAS\Protein.249

Protein

AquaSpec

31/01/2018

Figure S46. IR spectrum of compound 17a

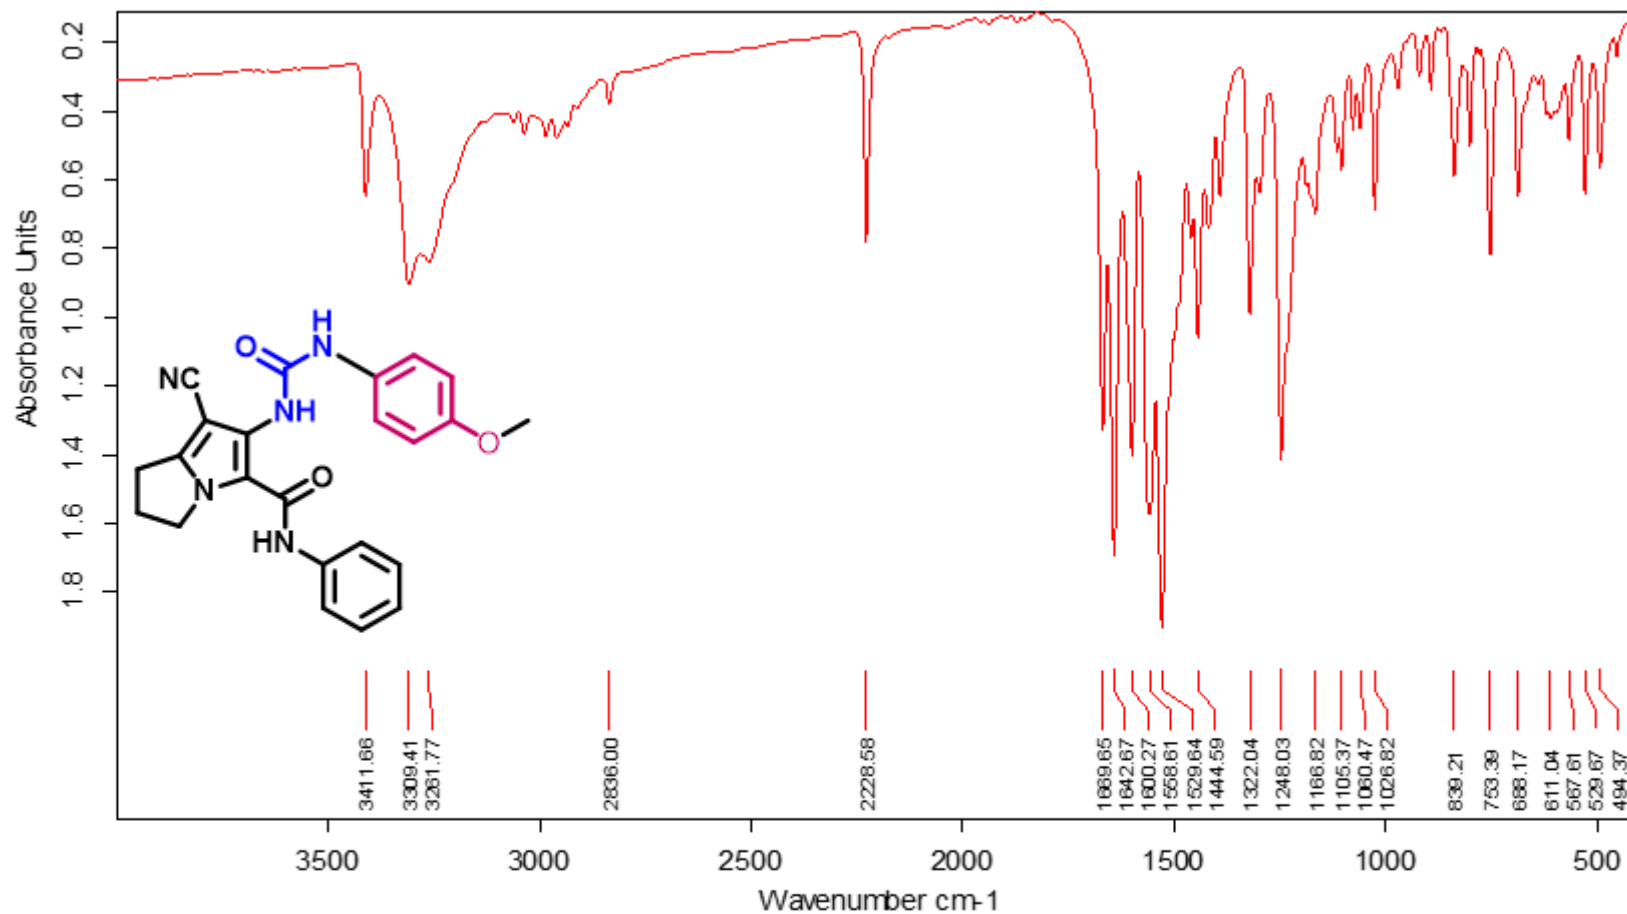

|                                           |         |          |            |
|-------------------------------------------|---------|----------|------------|
| C:\Program Files\OPUS_65\MEAS\Protein.206 | Protein | AquaSpec | 26/10/2017 |
|-------------------------------------------|---------|----------|------------|

Figure S47. IR spectrum of compound 17b

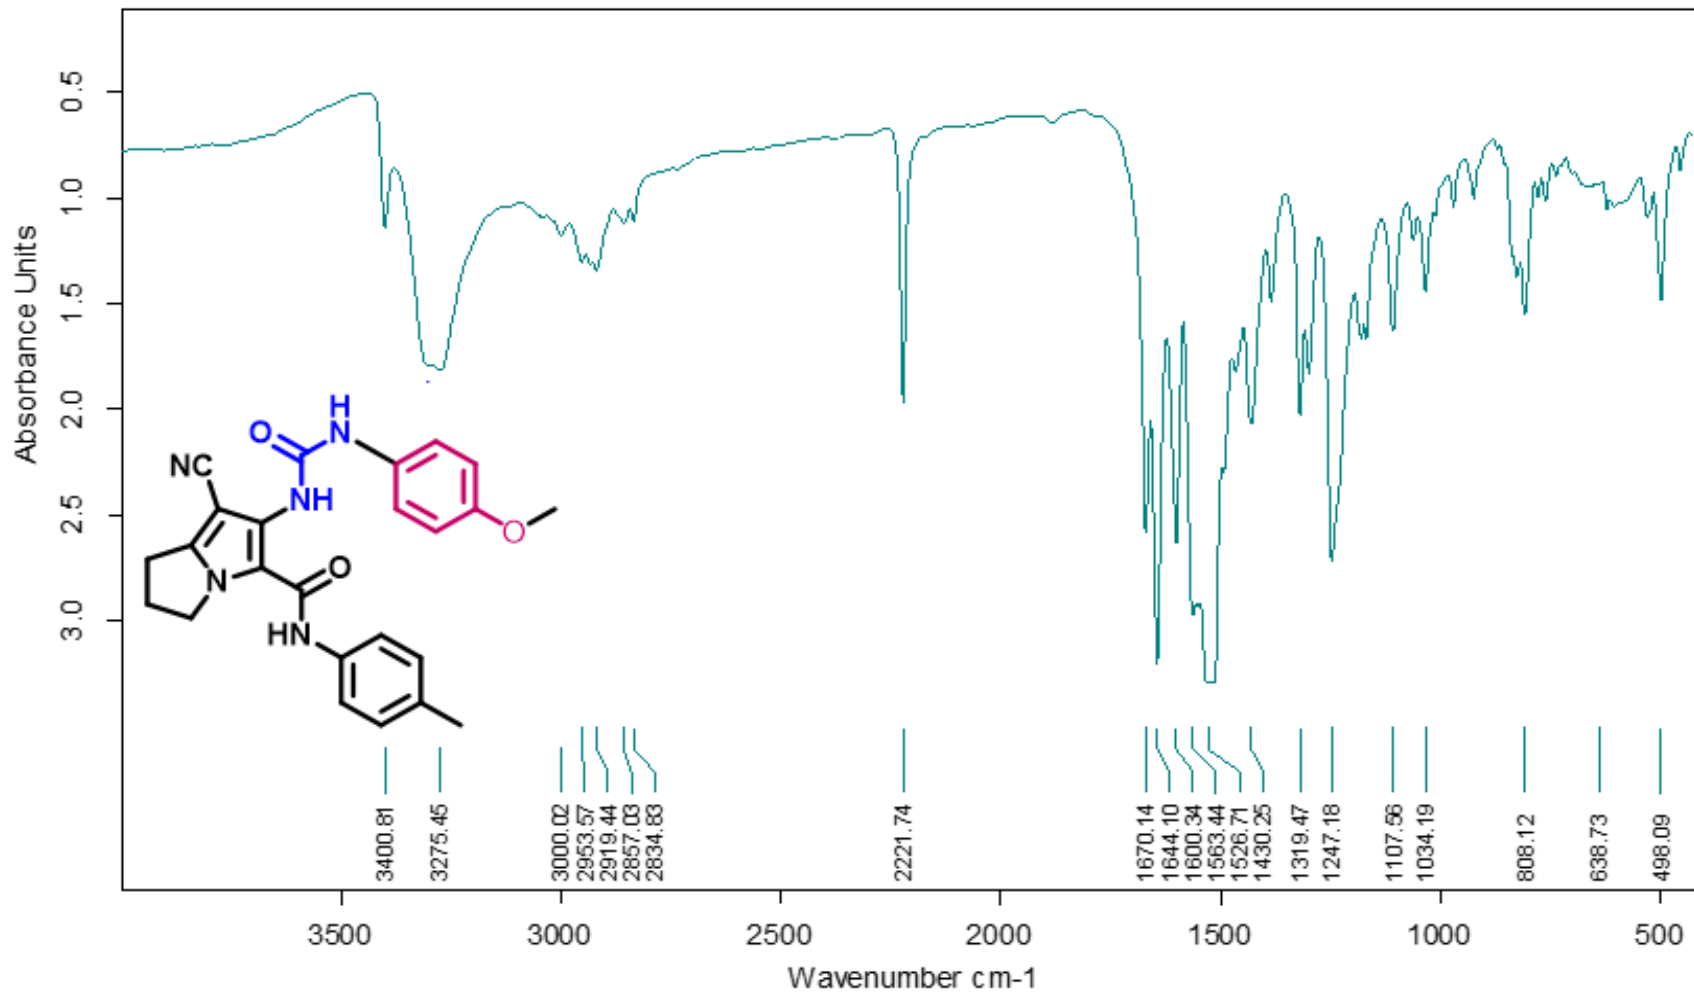

|                                           |         |          |            |
|-------------------------------------------|---------|----------|------------|
| C:\Program Files\OPUS_65\MEAS\Protein.250 | Protein | AquaSpec | 31/01/2018 |
|-------------------------------------------|---------|----------|------------|

Figure S48. IR spectrum of compound 17c

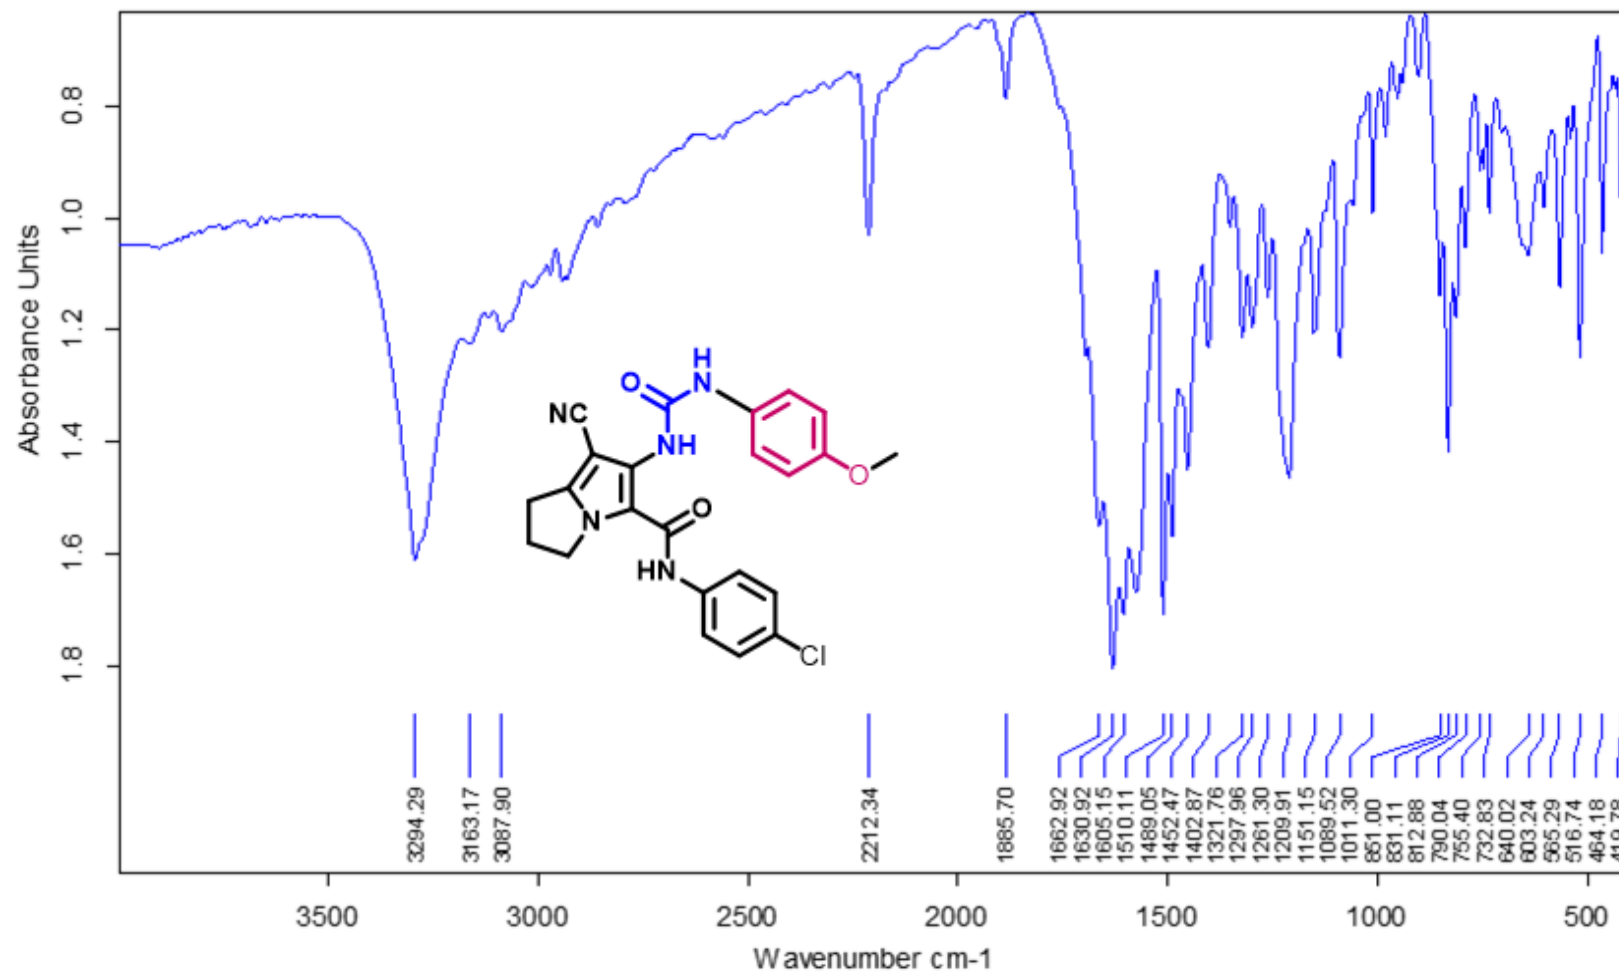

C:\Program Files\OPUS\_65\MEAS\Protein.220

Protein

AquaSpec

26/10/2017





Figure S50. IR spectrum of compound 18b

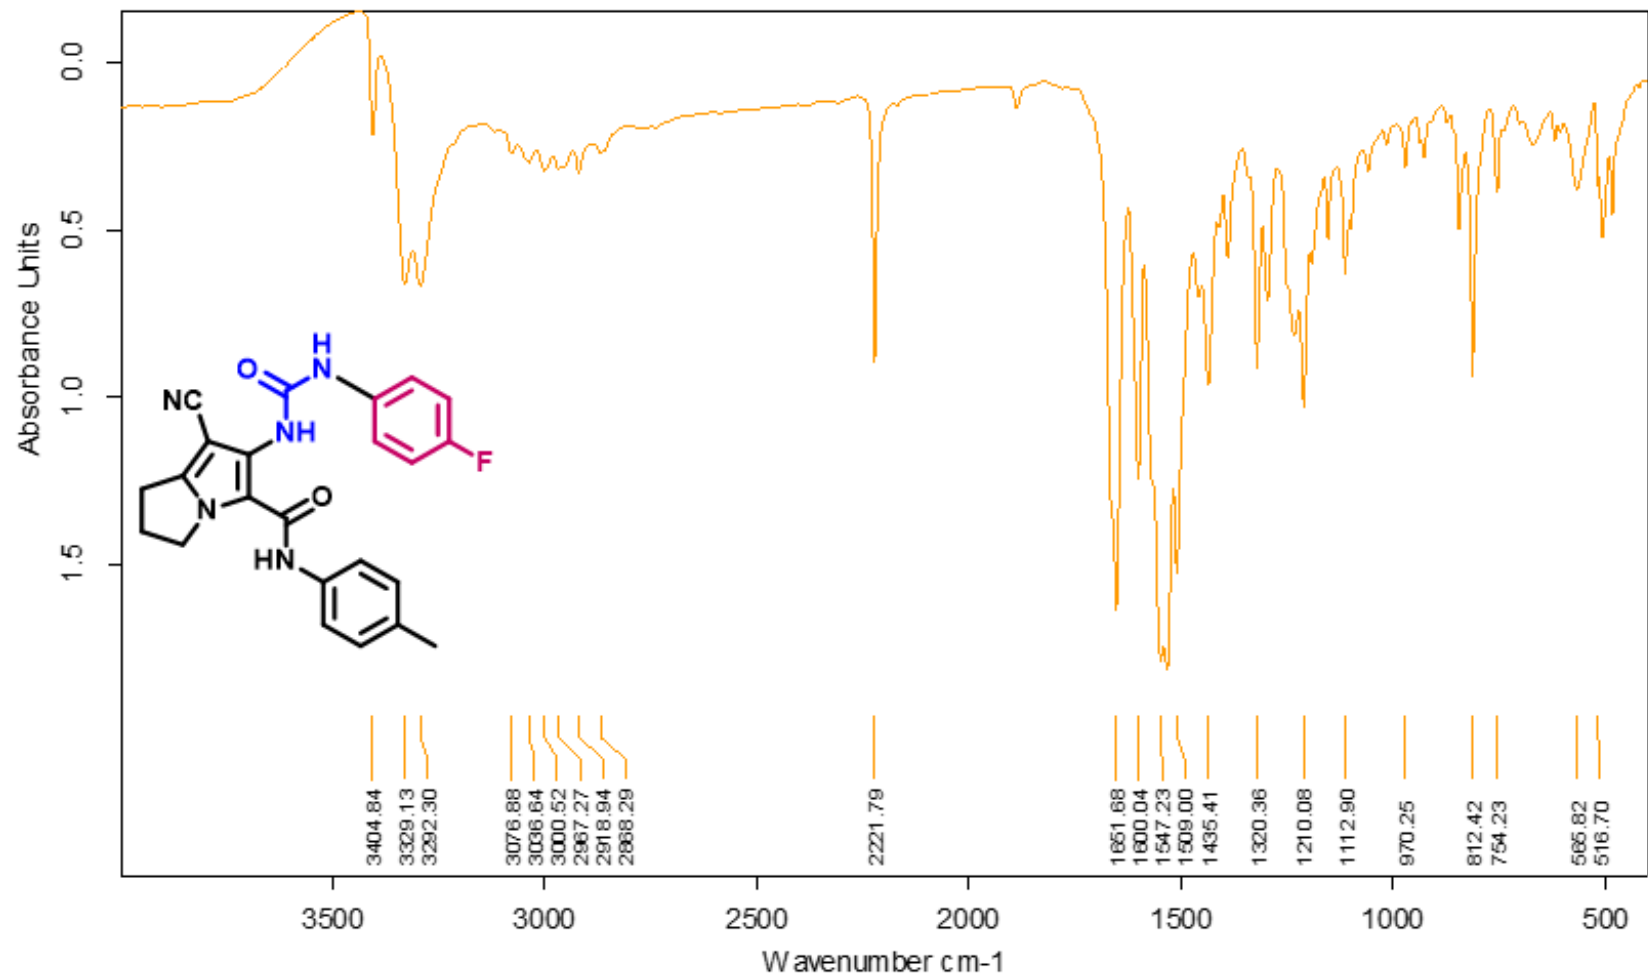

C:\Program Files\OPUS\_65\MEAS\Protein.252

Protein

AquaSpec

31/01/2018

Figure S51. IR spectrum of compound 18c

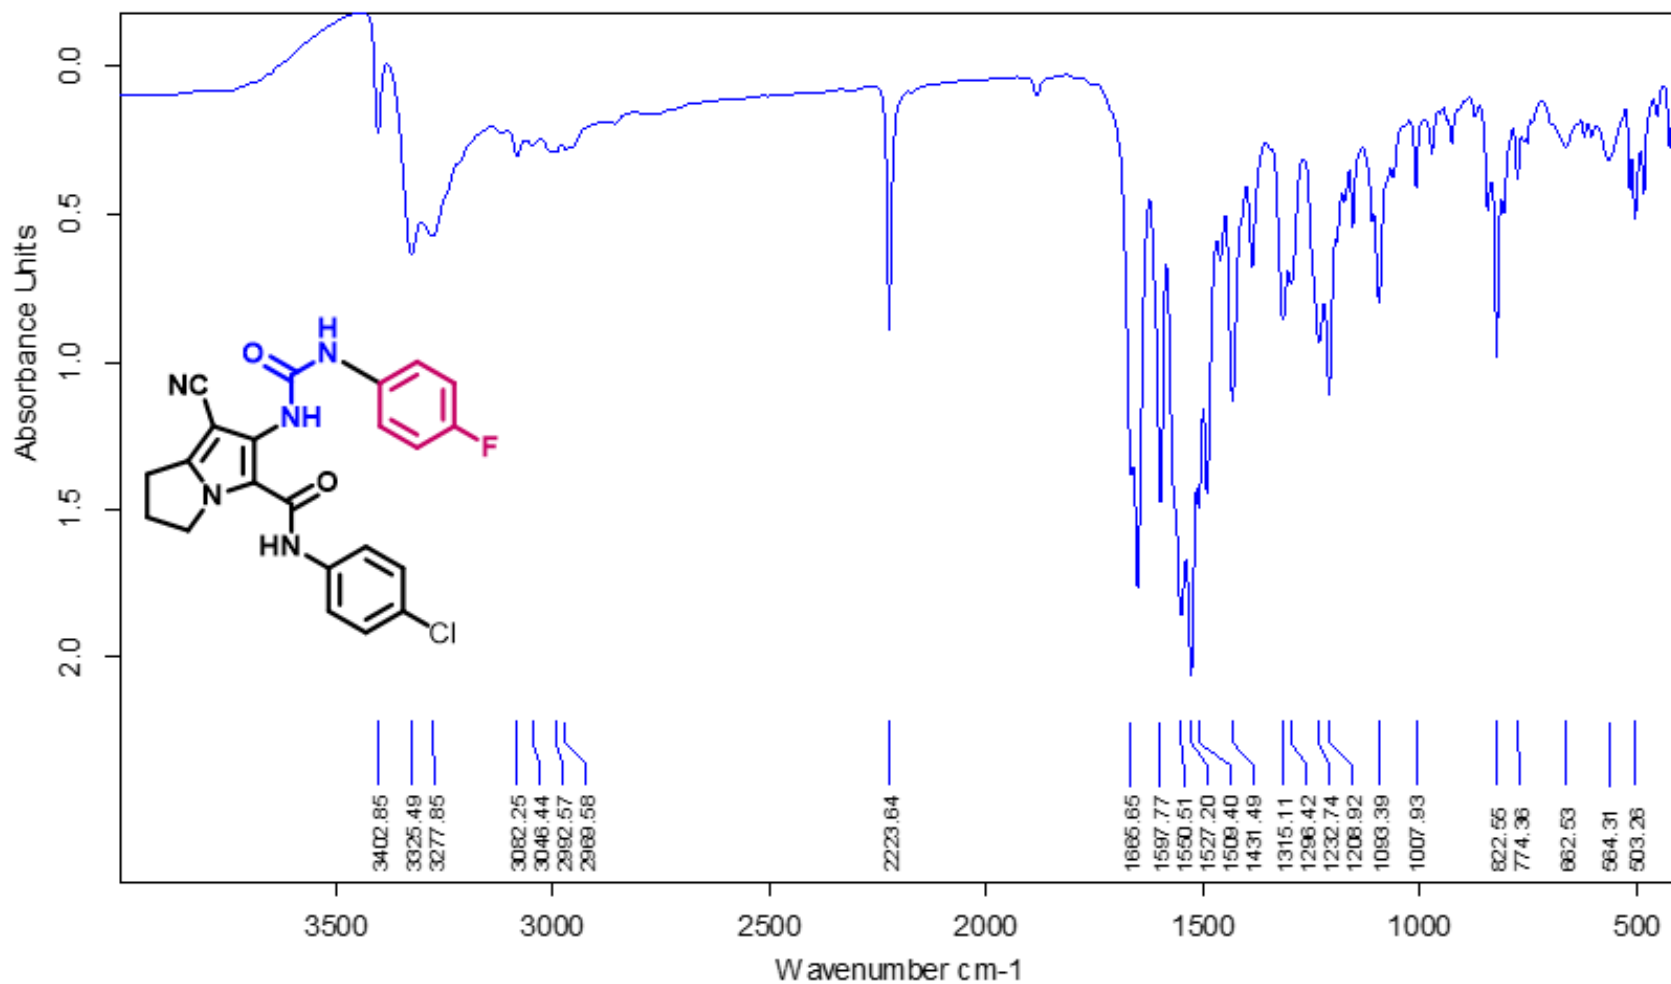

C:\Program Files\OPUS\_65\MEAS\Protein.253

Protein

AquaSpec

31/01/2018

Figure S52. IR spectrum of compound 19a

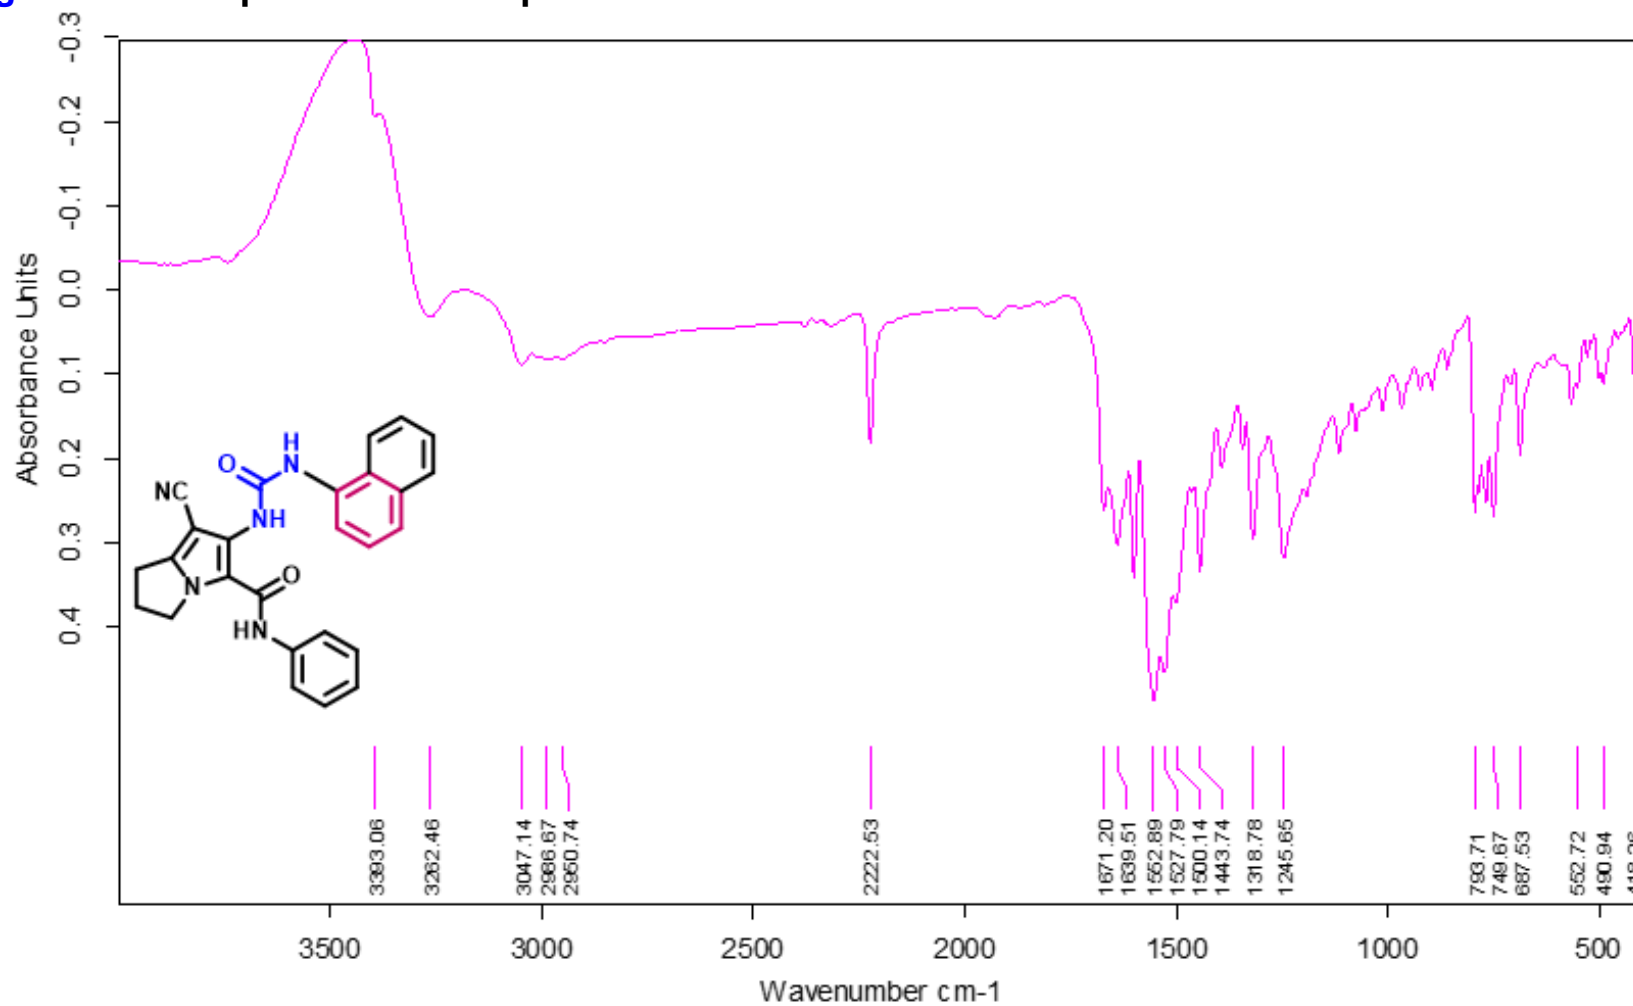

C:\Program Files\OPUS\_65\MEAS\Protein.255

Protein

AquaSpec

31/01/2018

Figure S53. IR spectrum of compound 19b

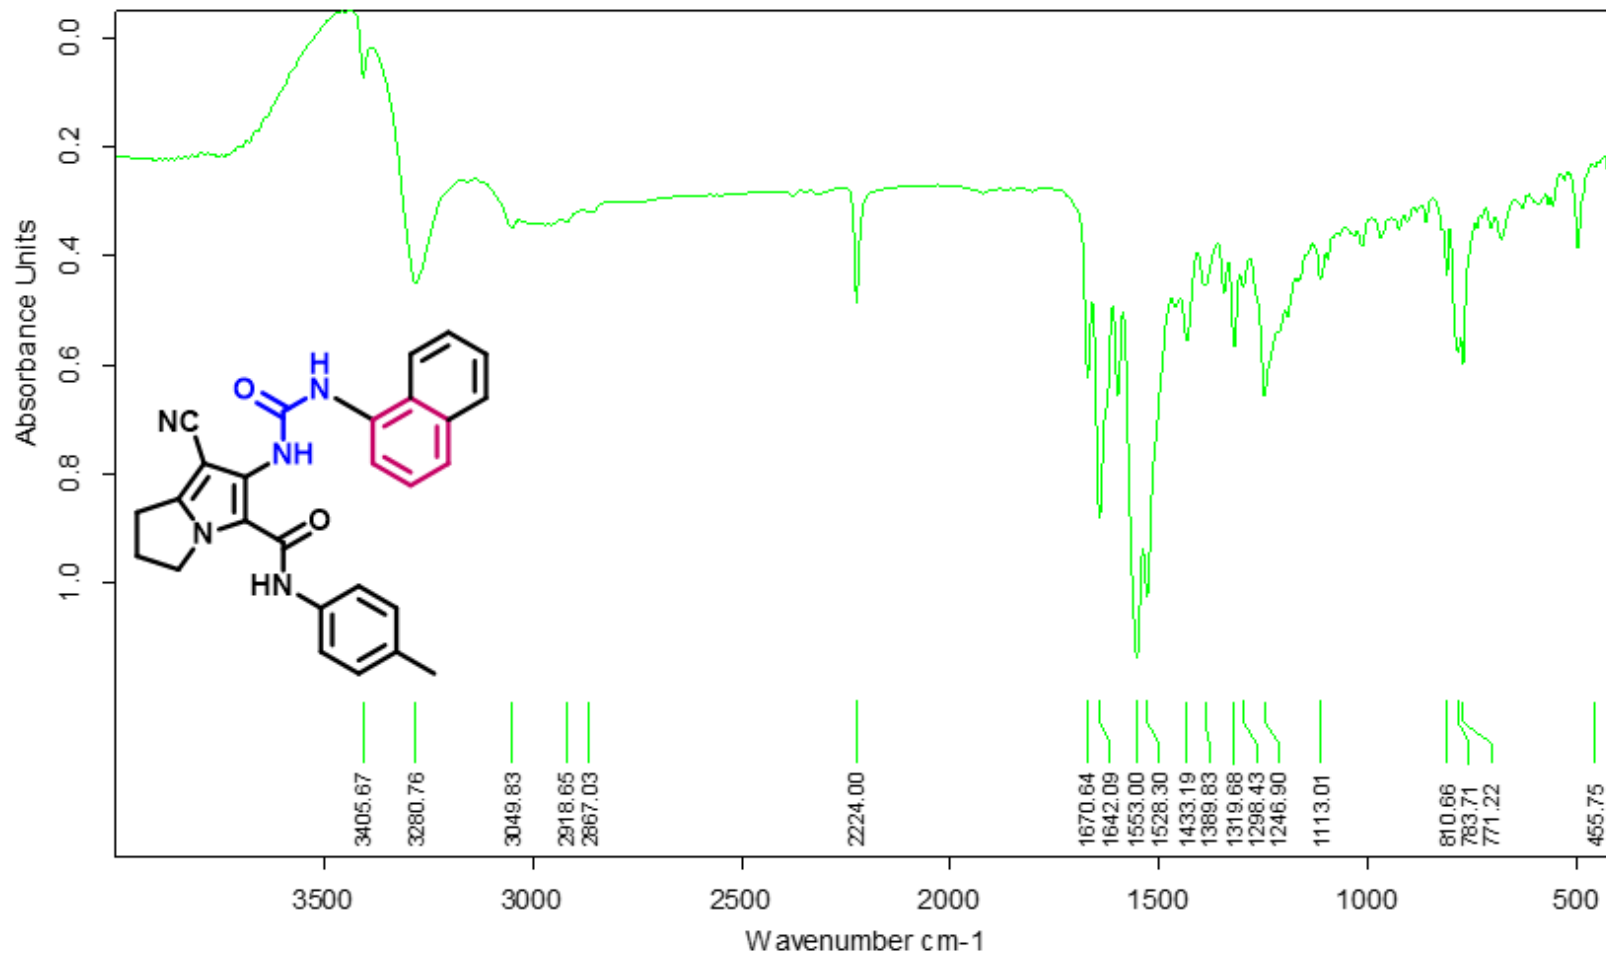

|                                           |         |          |            |
|-------------------------------------------|---------|----------|------------|
| C:\Program Files\OPUS_65\MEAS\Protein.256 | Protein | AquaSpec | 31/01/2018 |
|-------------------------------------------|---------|----------|------------|

Figure S54. IR spectrum of compound 19c

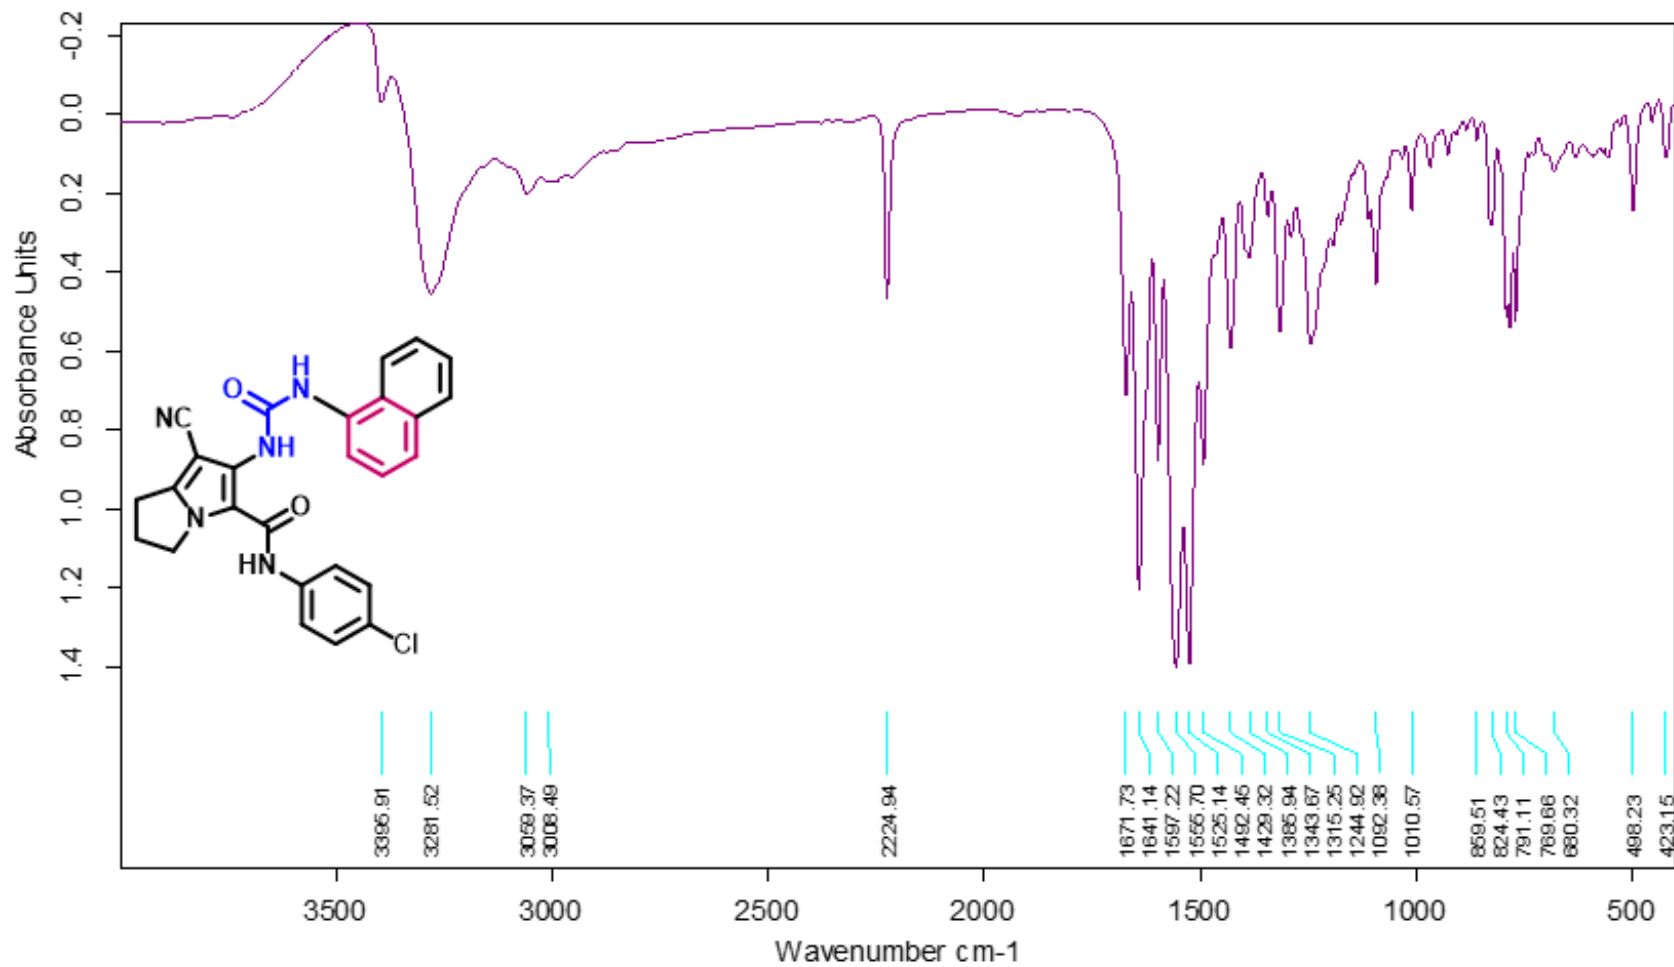

C:\Program Files\OPUS\_85\MEAS\Protein.257

Protein

AquaSpec

31/01/2018

Figure S55. IR spectrum of compound 20a

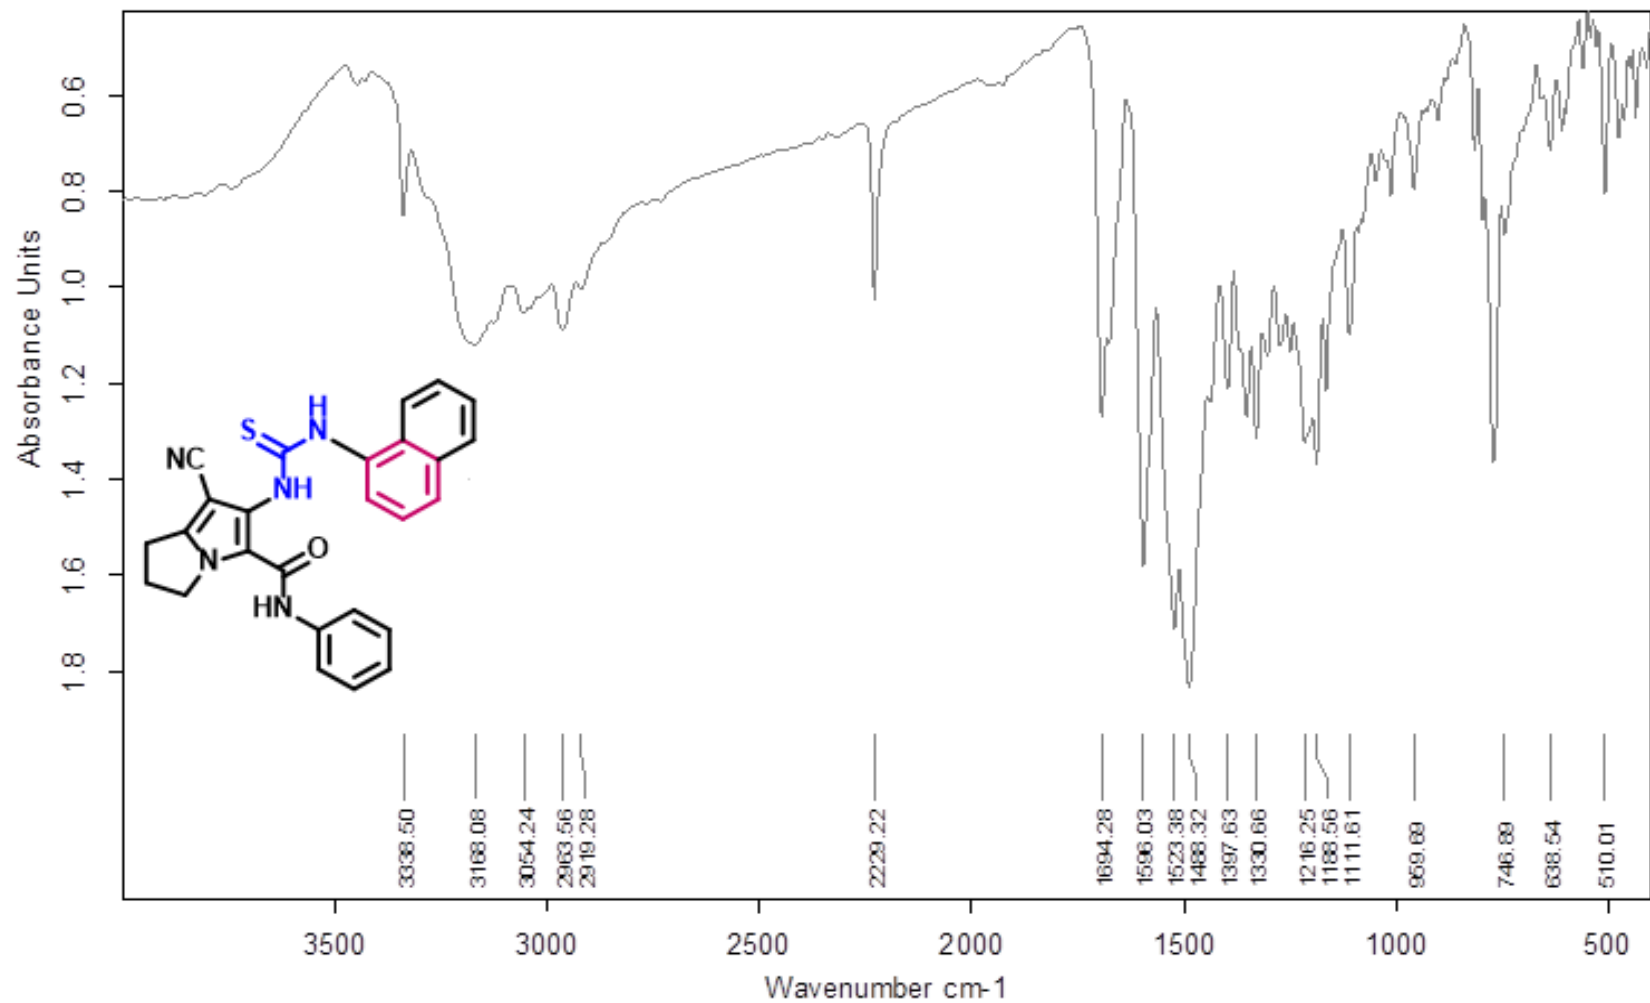

C:\Program Files\OPUS\_65\MEAS\Protein.280

Protein

AquaSpec

31/01/2018

Figure S56. IR spectrum of compound 20b

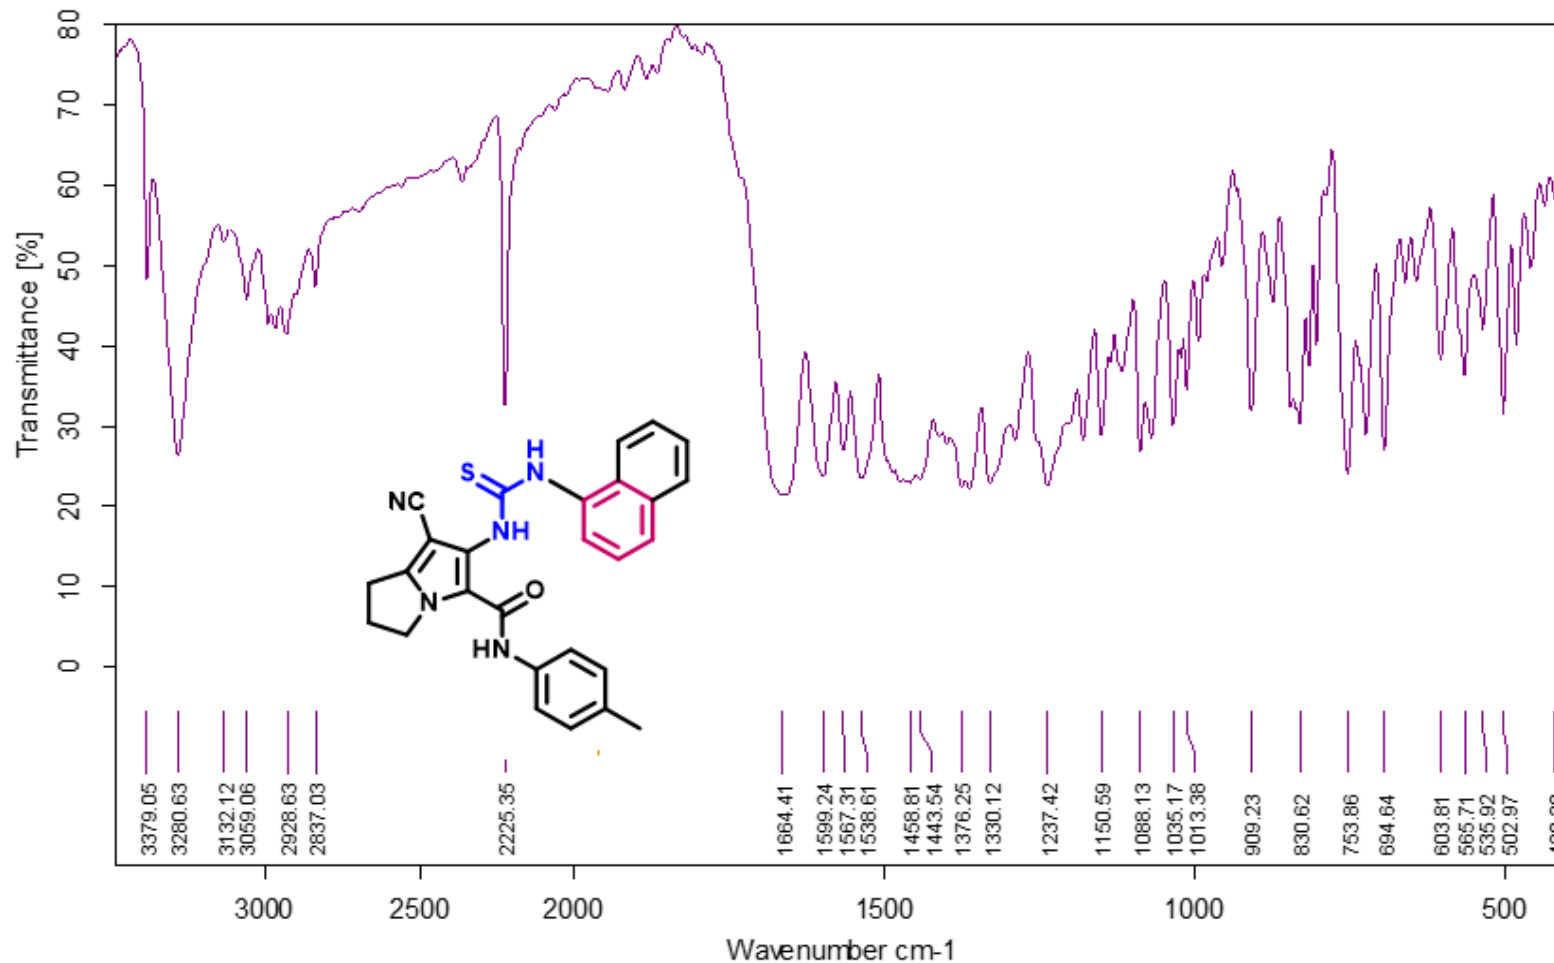

C:\Program Files\OPUS\_65\MEAS\MLT.128      MLT      Instrument type and / or accessory

Figure S57. IR spectrum of compound 20c

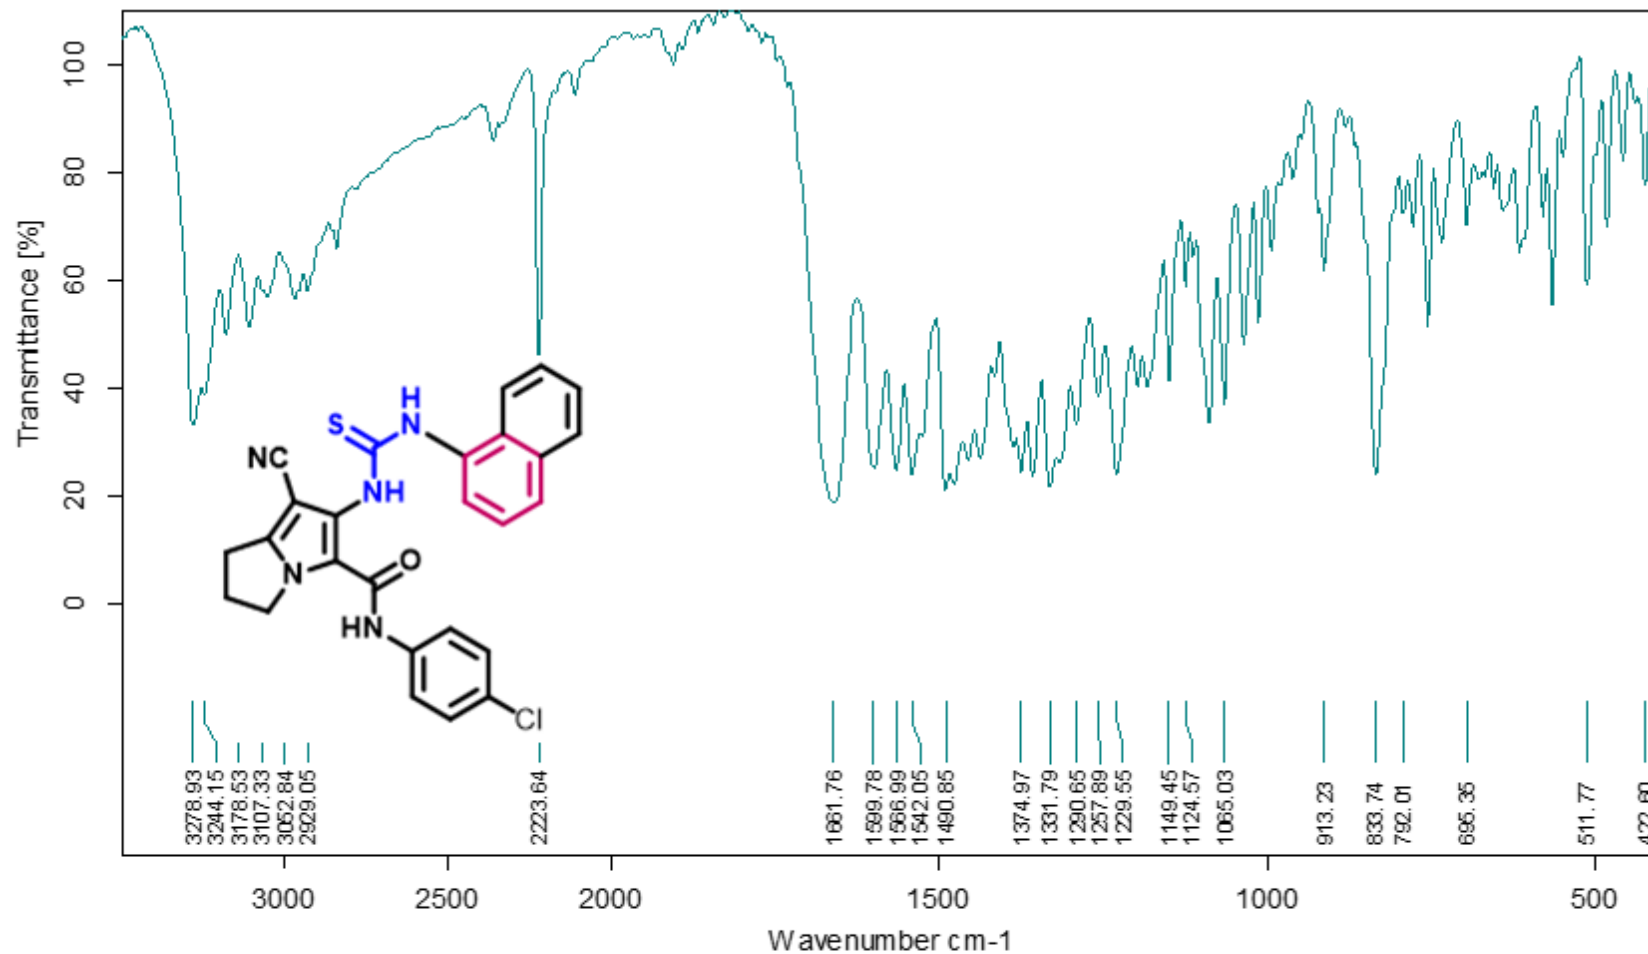

C:\Program Files\OPUS\_65\MEAS\MLT.130

MLT

Instrument type and / or accessory



## **$^1\text{H}$ -NMR, $^{13}\text{C}$ -NMR and DEPT $\text{C}^{135}$ Spectra**

$^1\text{H}$ -NMR spectra were recorded on a BRUKER AVANCE III spectrometer (at the faculty of pharmacy, Umm Al-Qura University) at 500 MHz in the specified solvent, chemical shifts were reported on the  $\delta$  (ppm) scale and were related to that of the solvent and  $J$  values are given in Hz.  $^{13}\text{C}$  NMR and DEPT  $\text{C}^{135}$  spectra were obtained on a BRUKER AVANCE III at 125 MHz (at the faculty of pharmacy, Umm Al-Qura University).



Figure S59. <sup>1</sup>H-NMR (DMSO, 500 MHz, δ ppm) spectrum of compound 16a (zoom on aliphatic Hs)

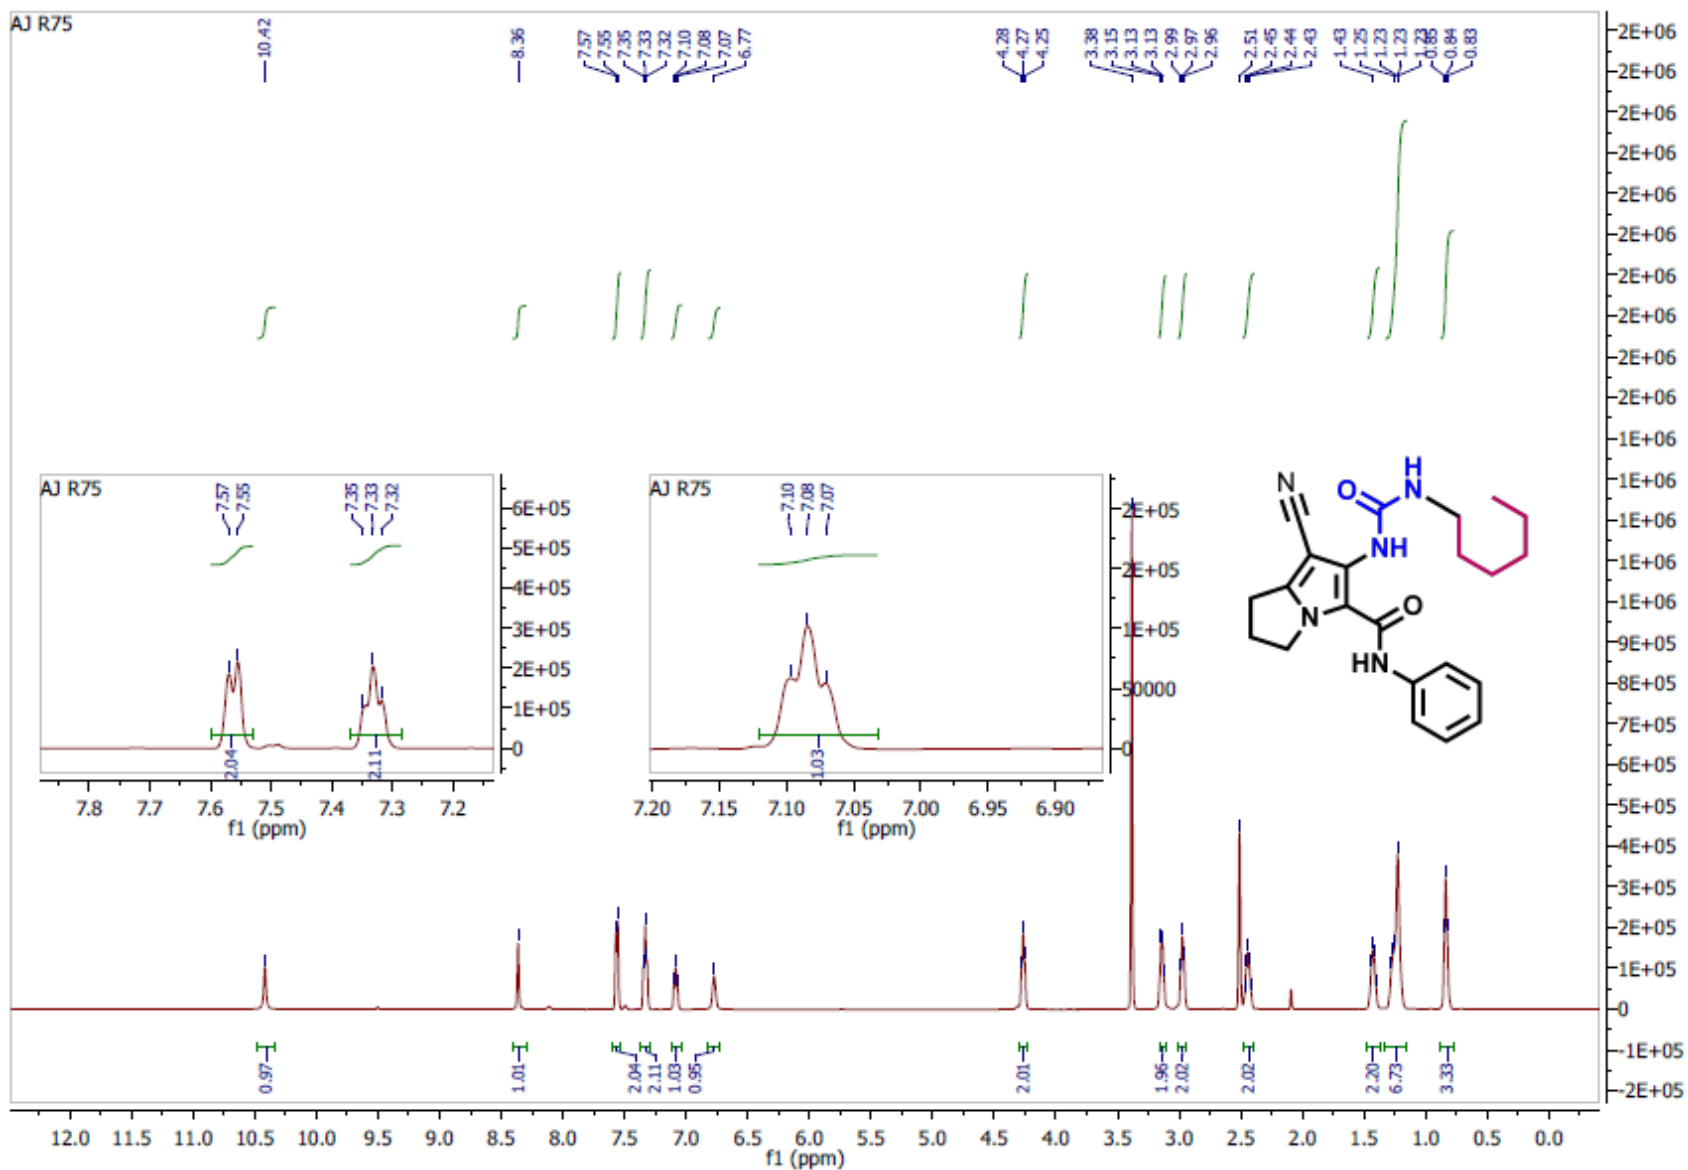

**Figure S60.**  $^1\text{H-NMR}$  (DMSO, 500 MHz,  $\delta$  ppm) spectrum of compound **16a** (zoom on aliphatic Hs)

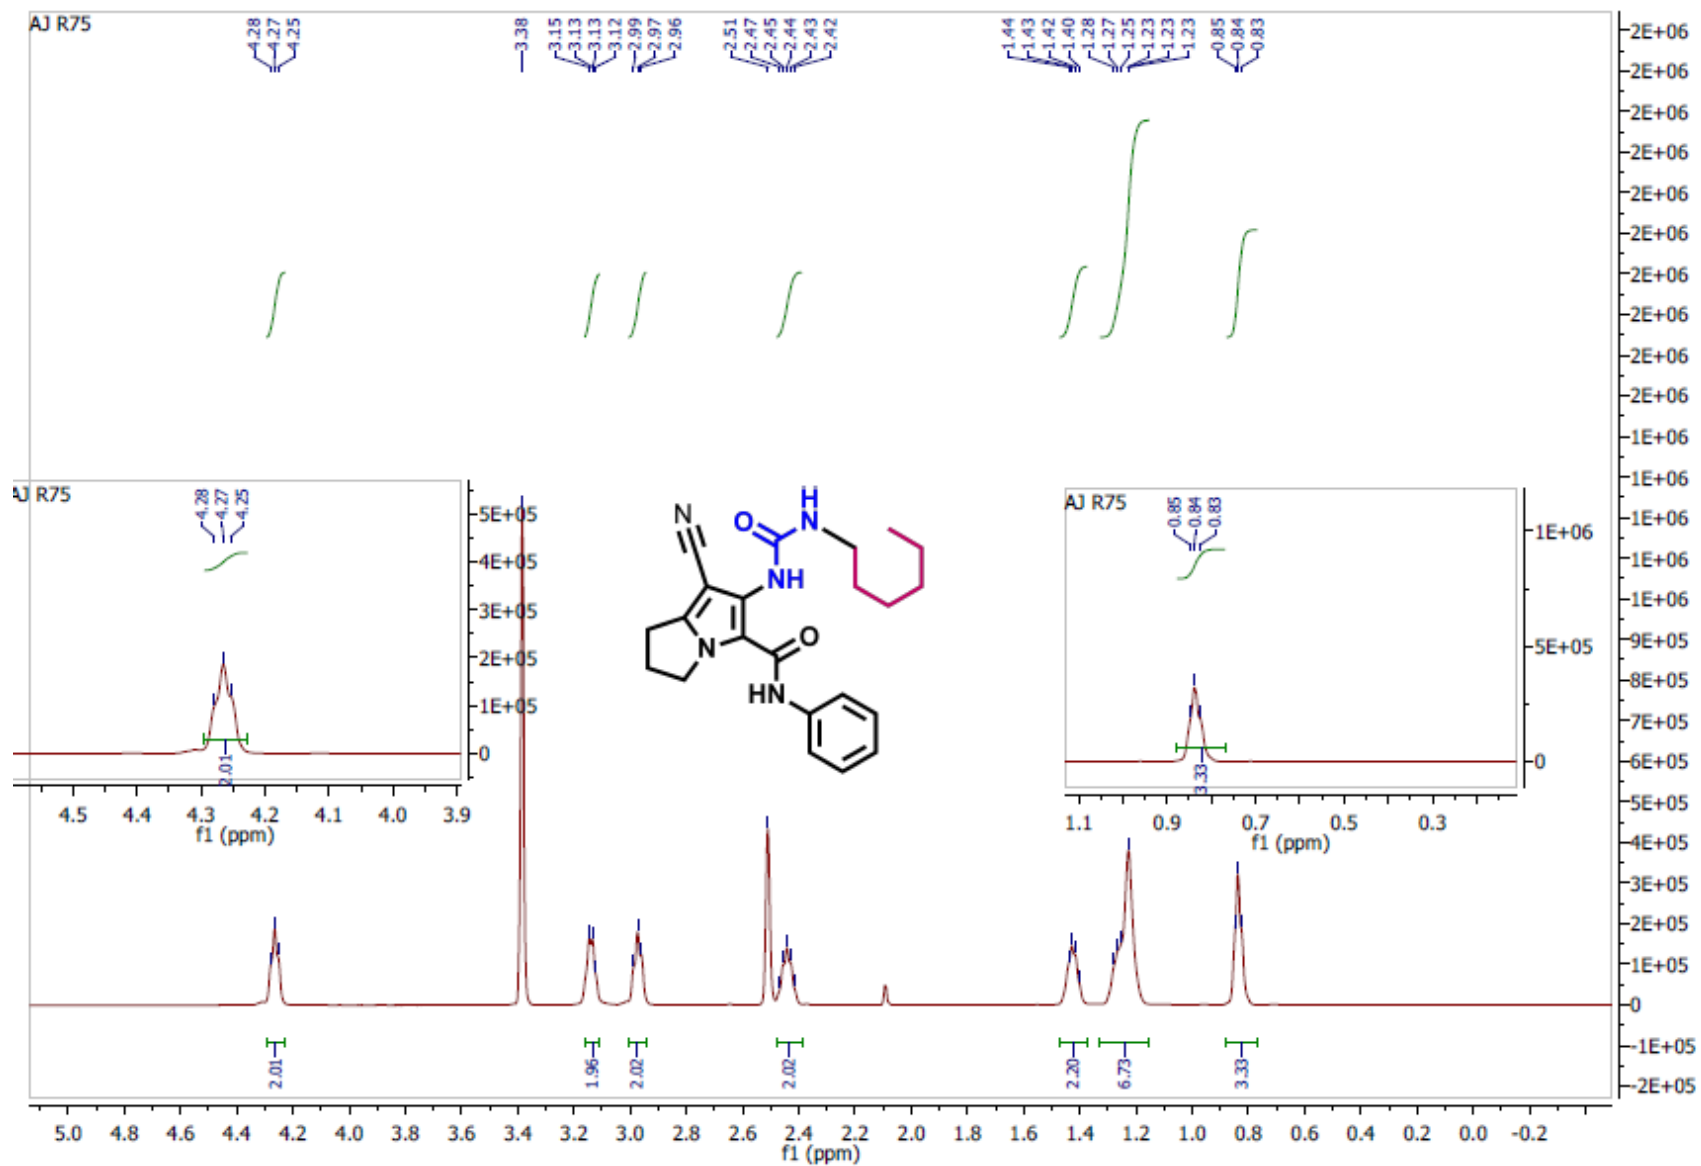

**Figure S61.**  $^1\text{H-NMR}$  (DMSO, 500 MHz,  $\delta$  ppm) spectrum of compound **16a** (zoom on aliphatic Hs)

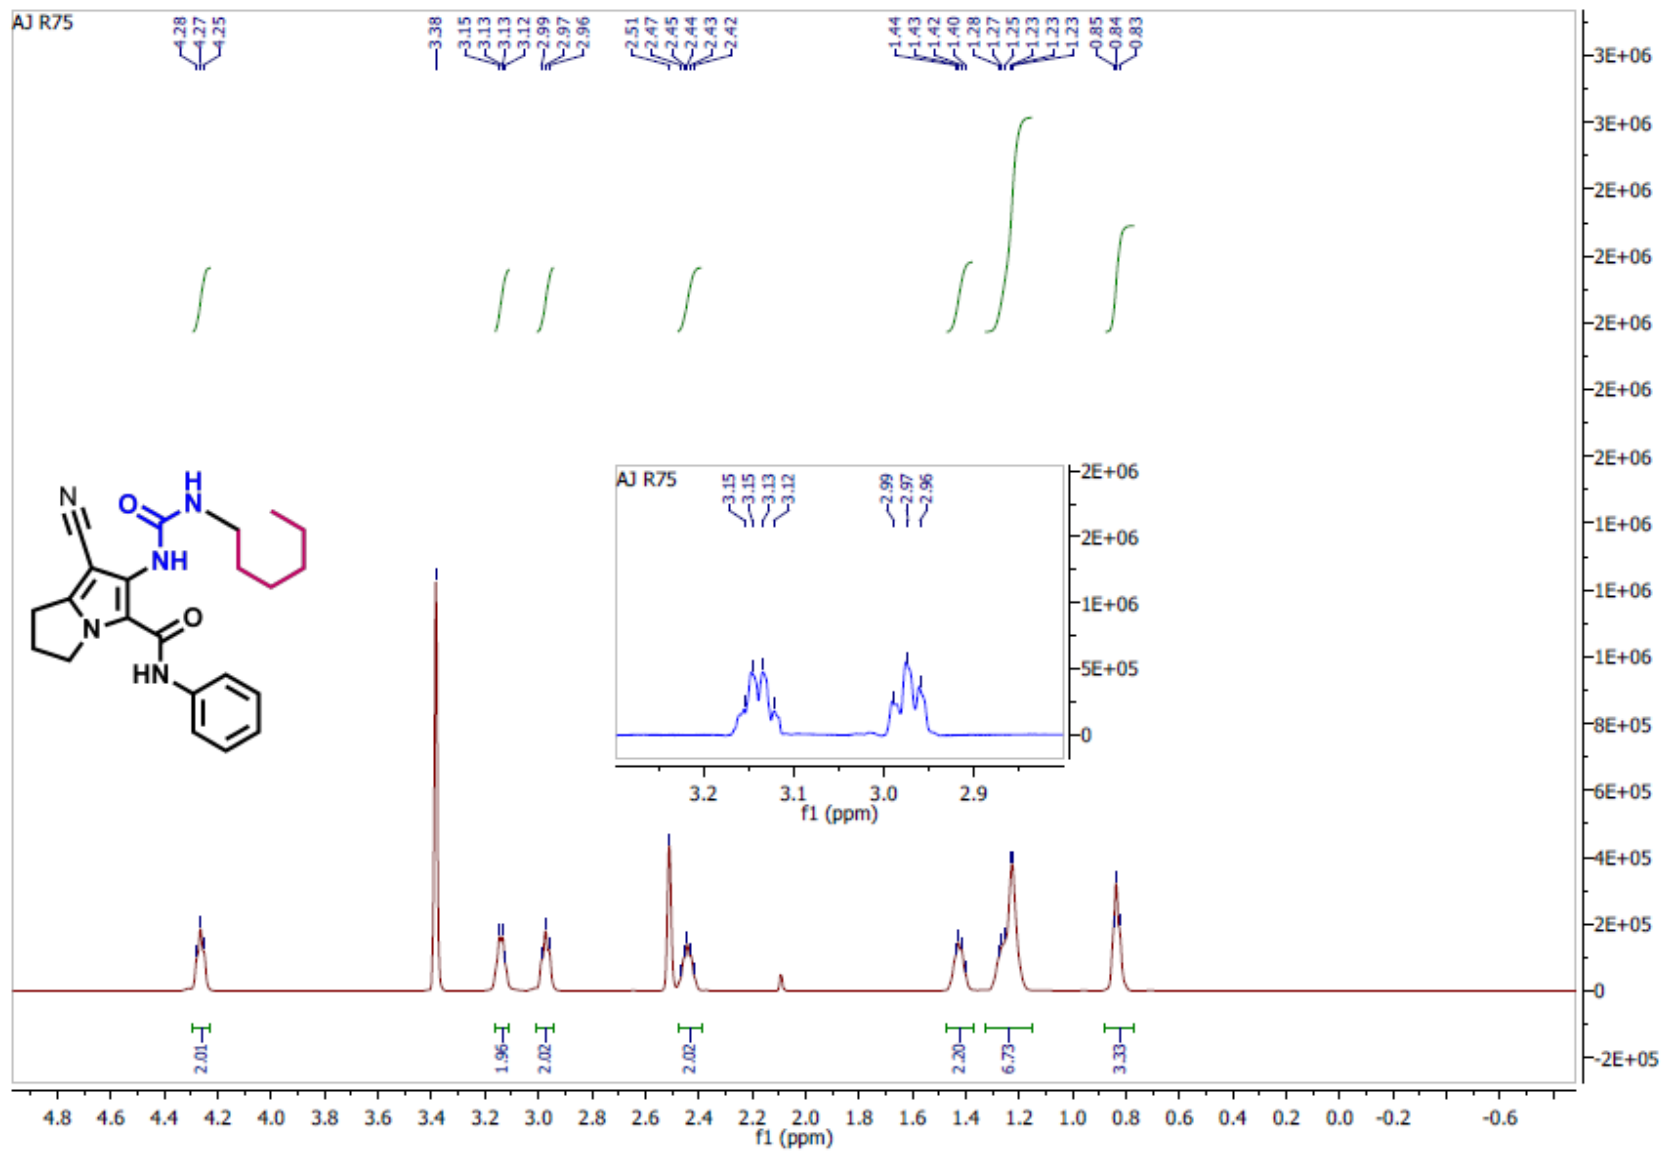

Figure S62.  $^1\text{H-NMR}$  (DMSO, 500 MHz,  $\delta$  ppm) spectrum of compound **16a** (zoom on NHs & aromatic Hs)

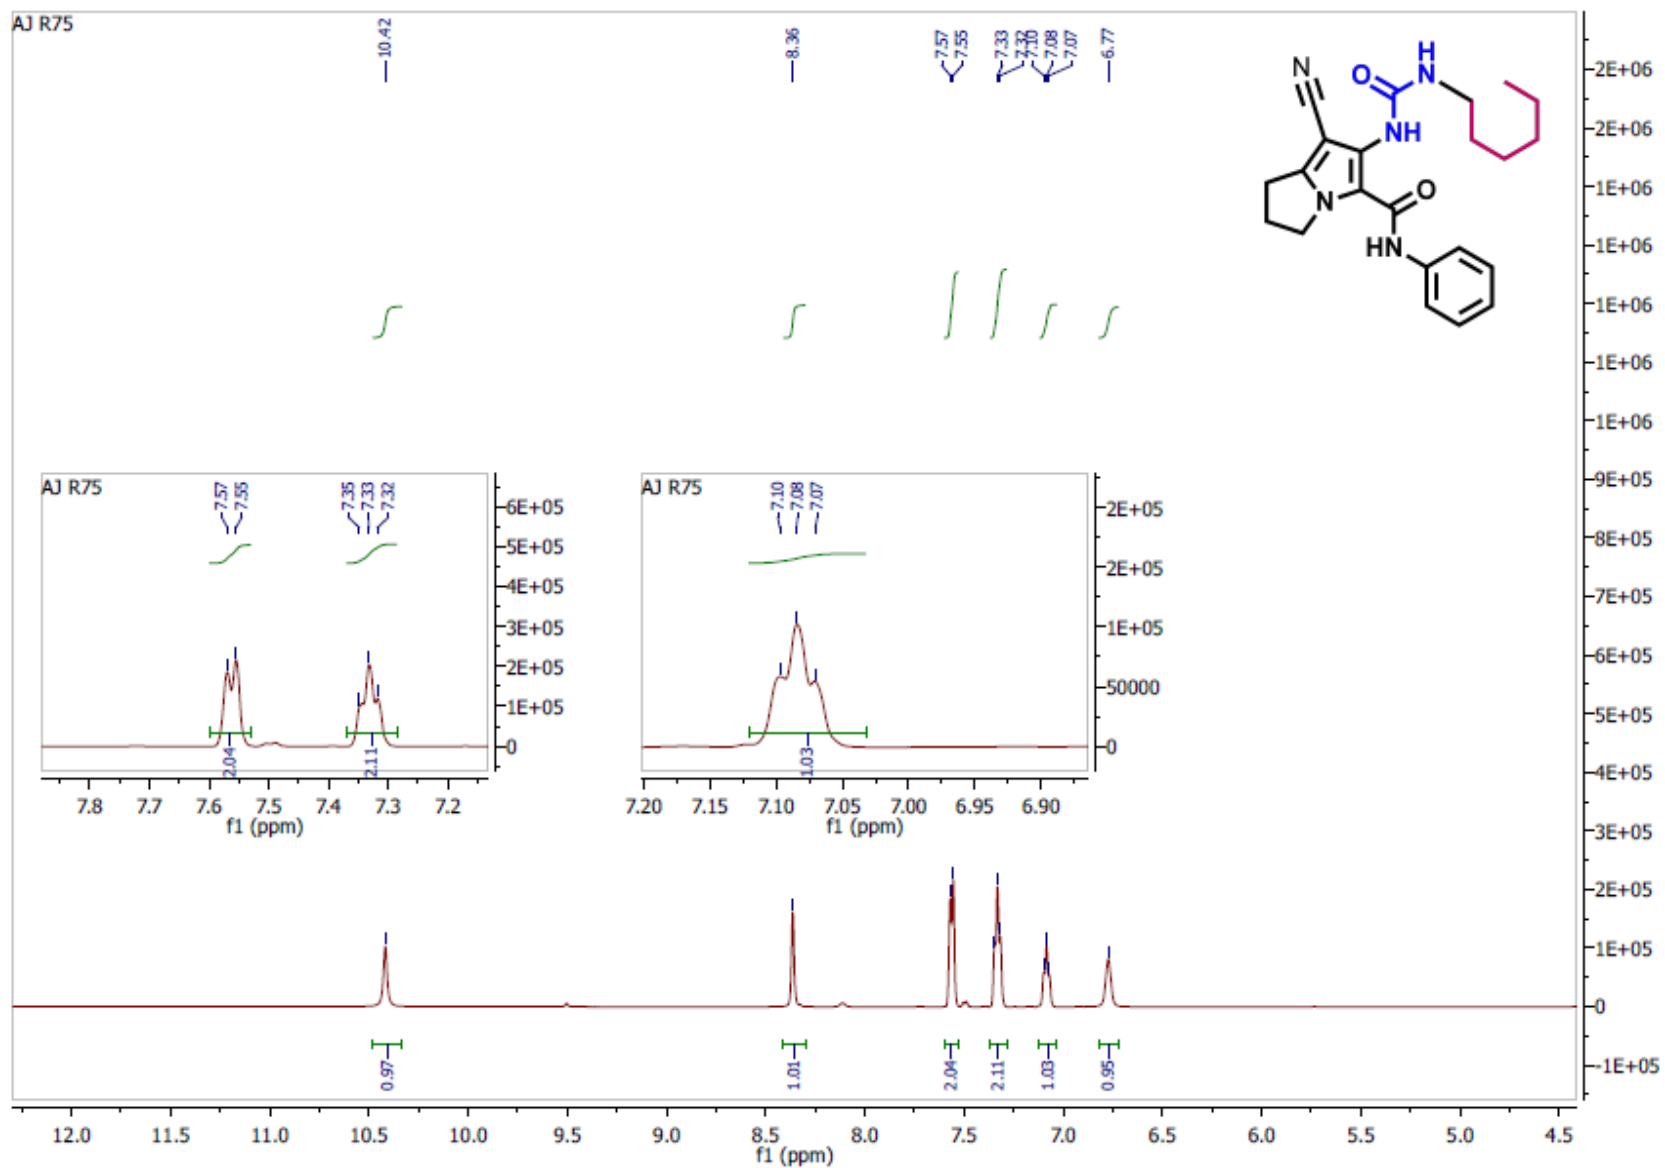

Figure S63.  $^{13}\text{C}$ -NMR (DMSO, 125 MHz,  $\delta$  ppm) spectrum of compound **16a**

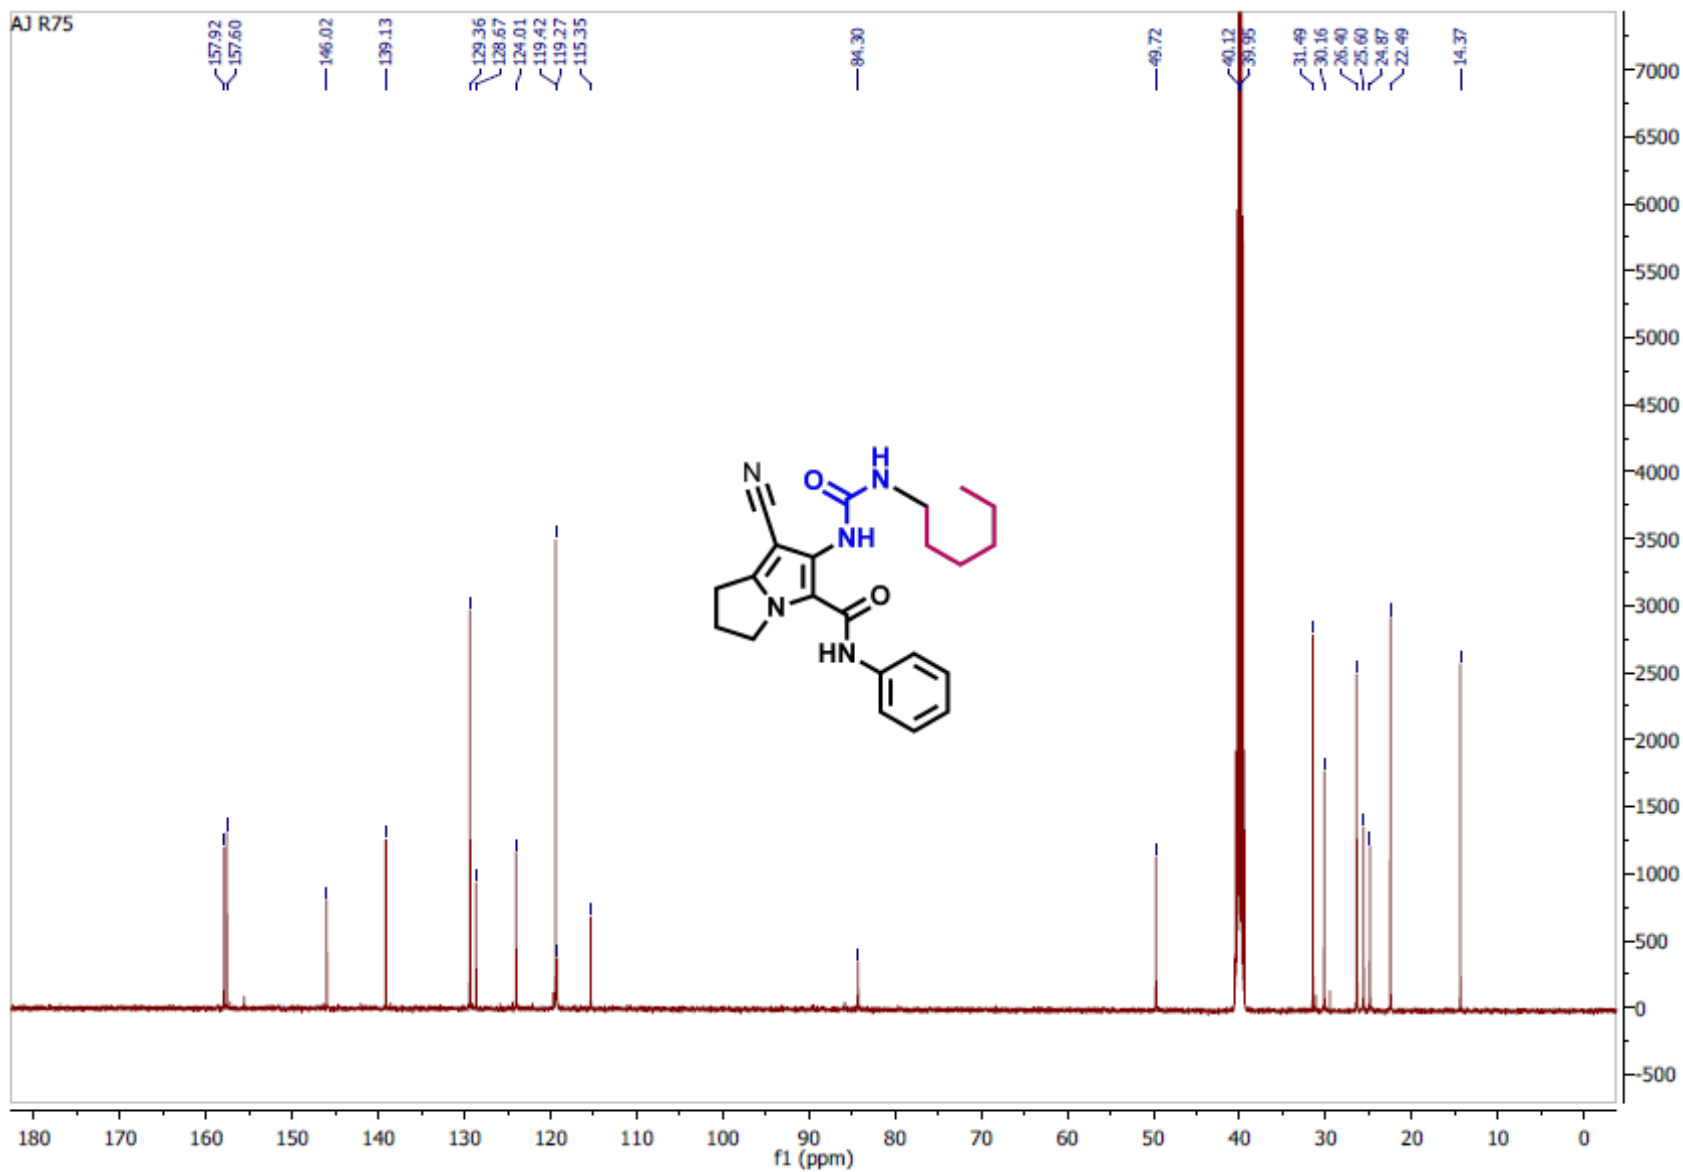

**Figure S64.**  $^{13}\text{C}$ -NMR (DMSO, 125 MHz,  $\delta$  ppm) spectrum of compound **16a** (zoom on aliphatic Cs)

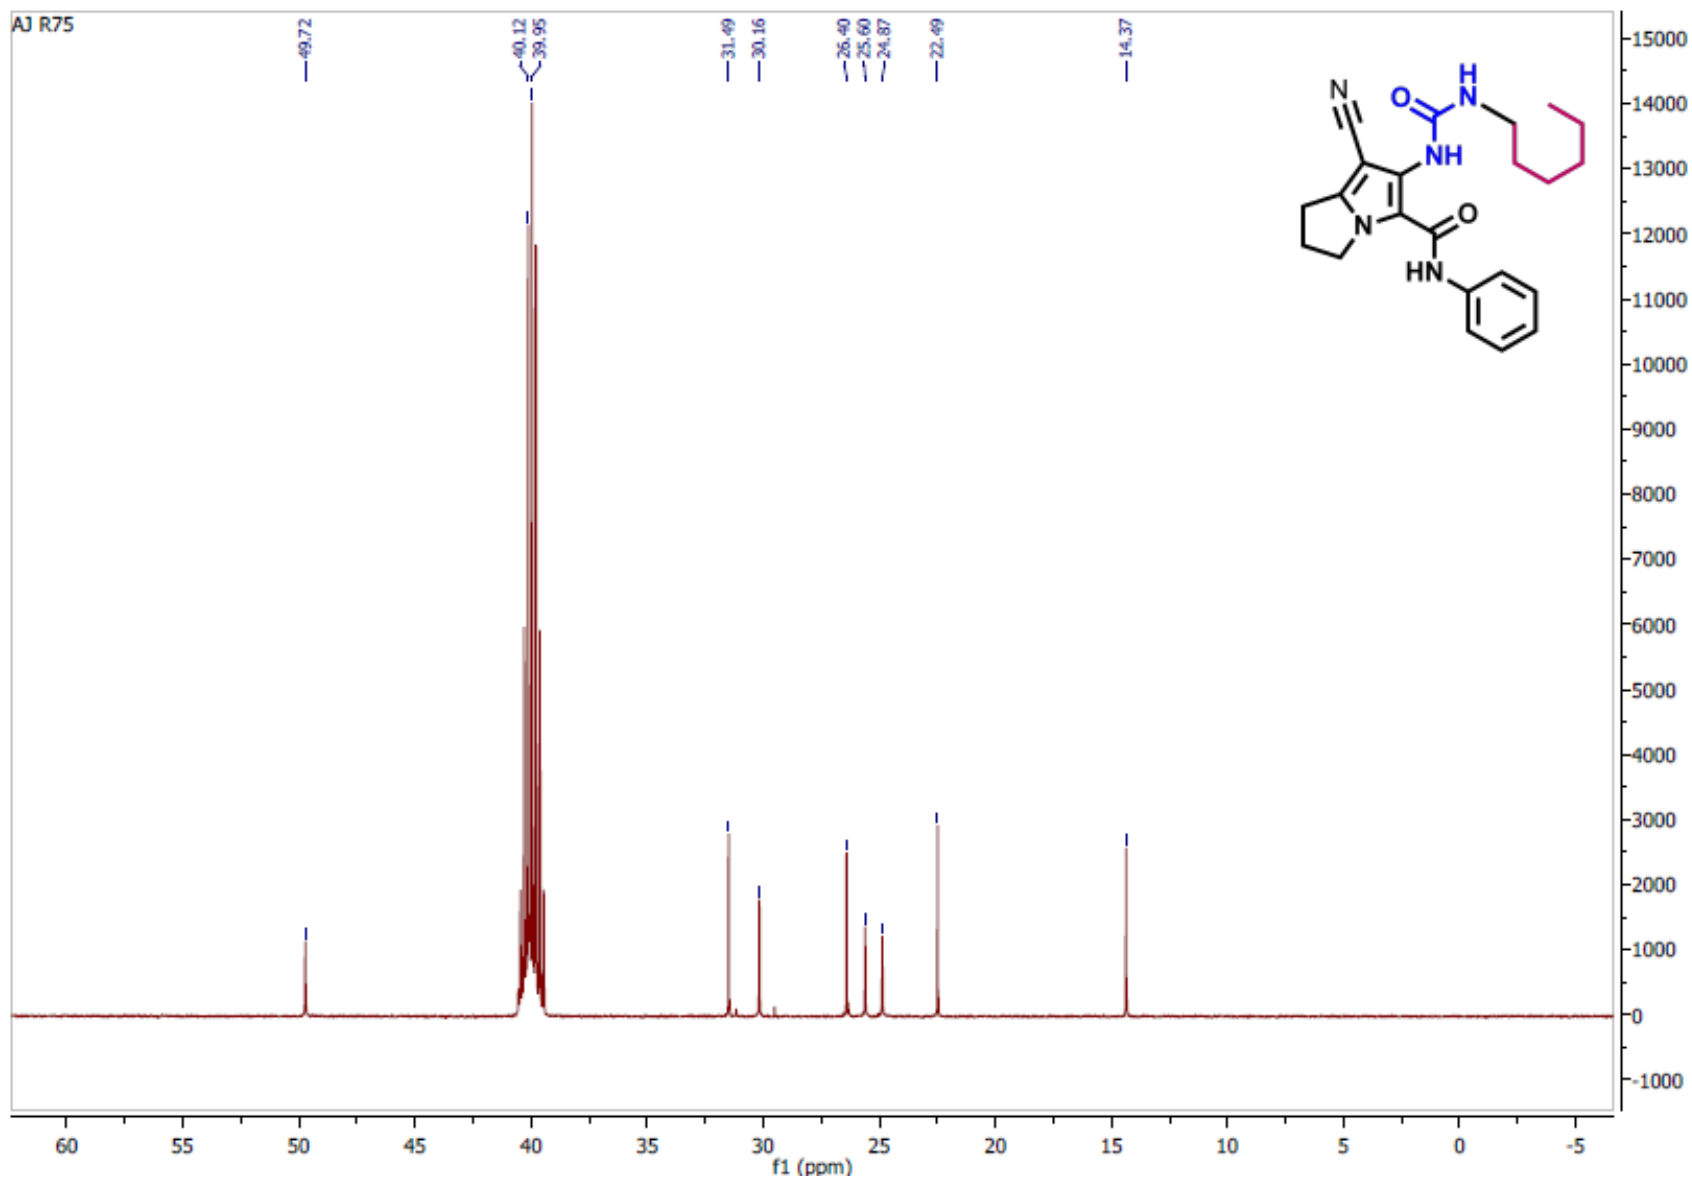



**Figure S65.**  $^{13}\text{C}$ -NMR (DMSO, 125 MHz,  $\delta$  ppm) spectrum of compound **16a** (zoom on aromatic Cs)

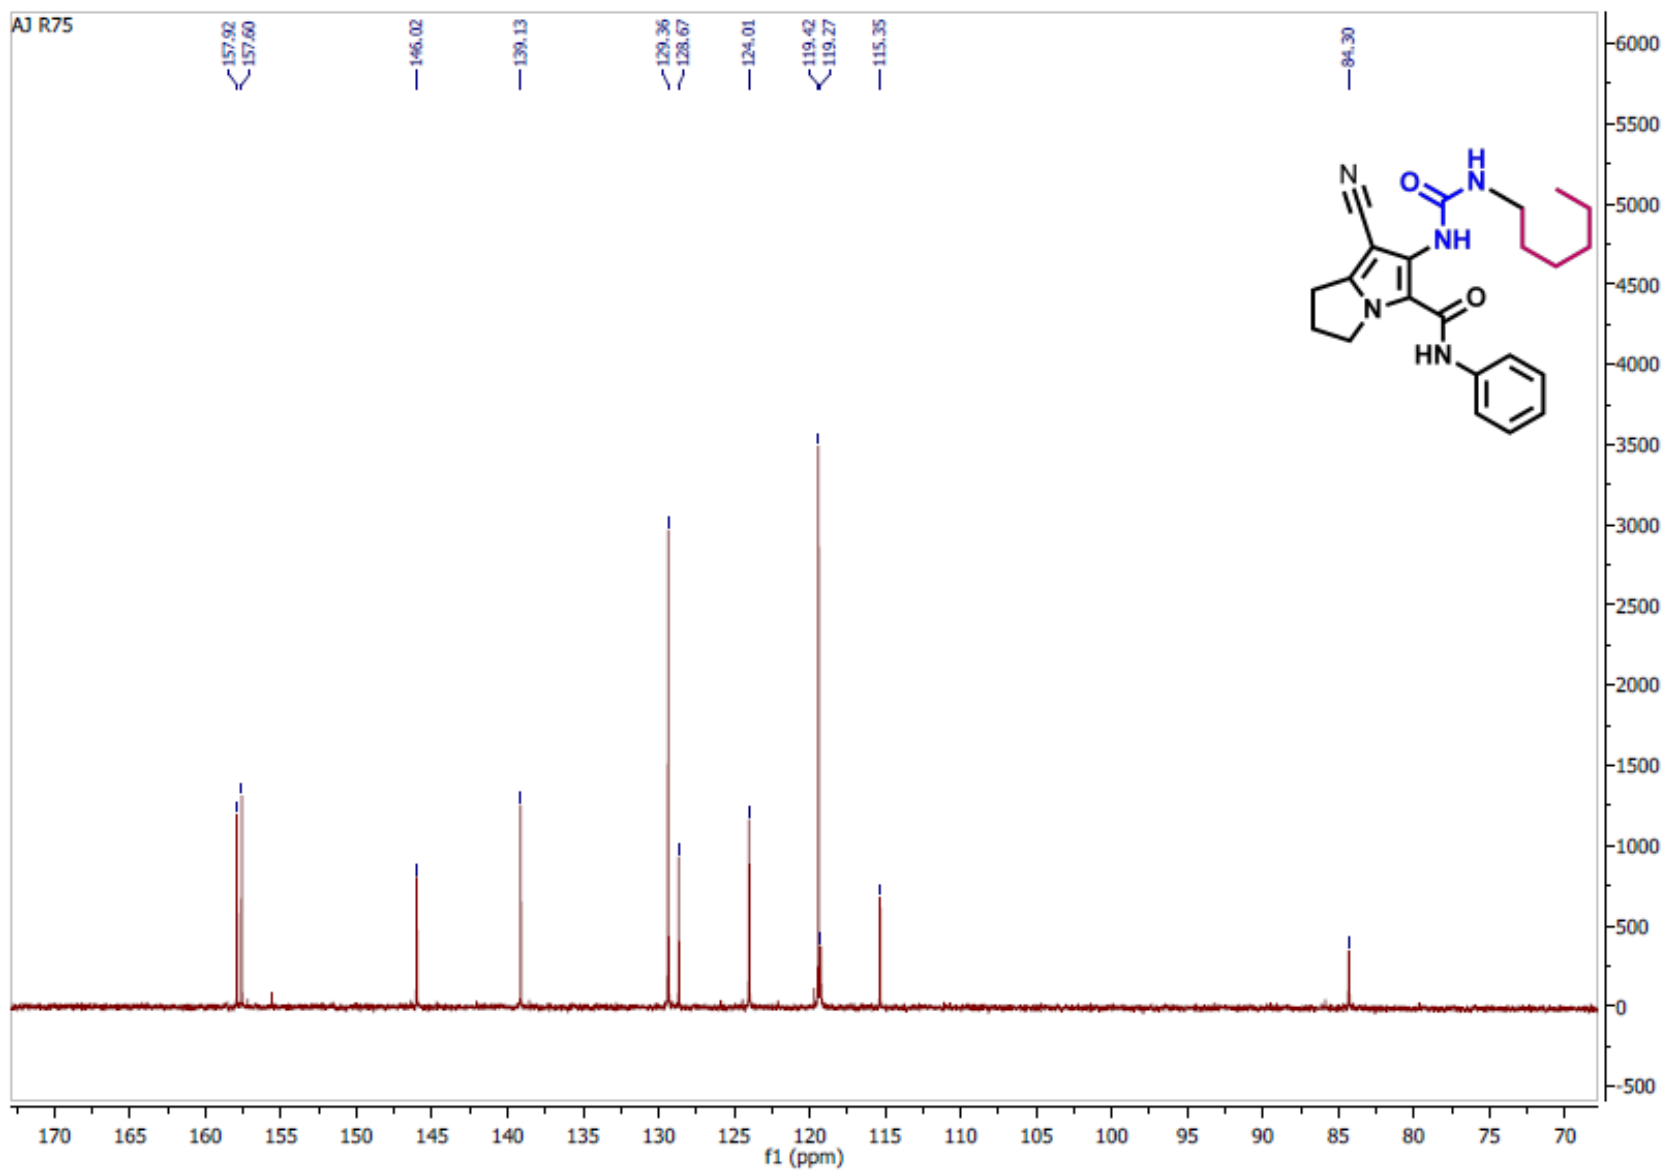

Figure S66. DEPT C<sup>135</sup> (DMSO, 125 MHz,  $\delta$  ppm) of compound **16a**.

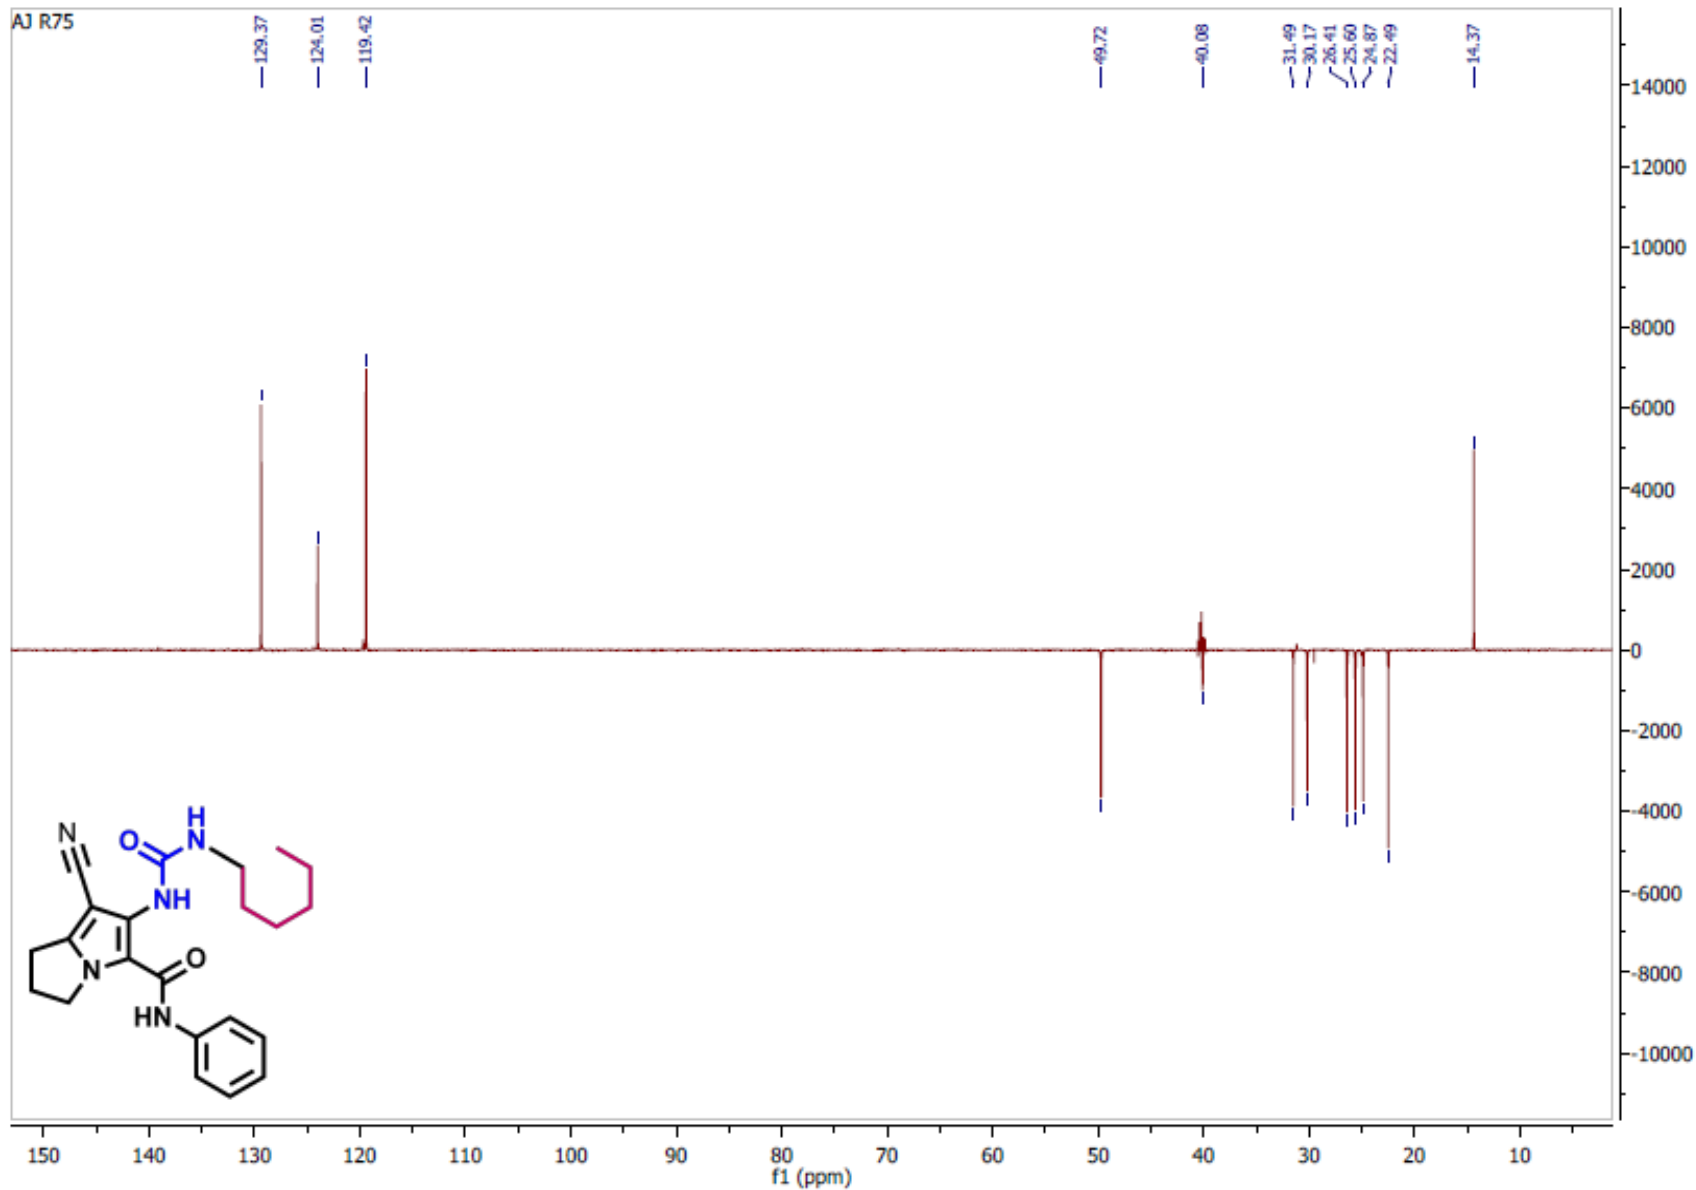

Figure S67. <sup>1</sup>H-NMR (DMSO, 500 MHz, δ ppm) spectrum of compound 16b.

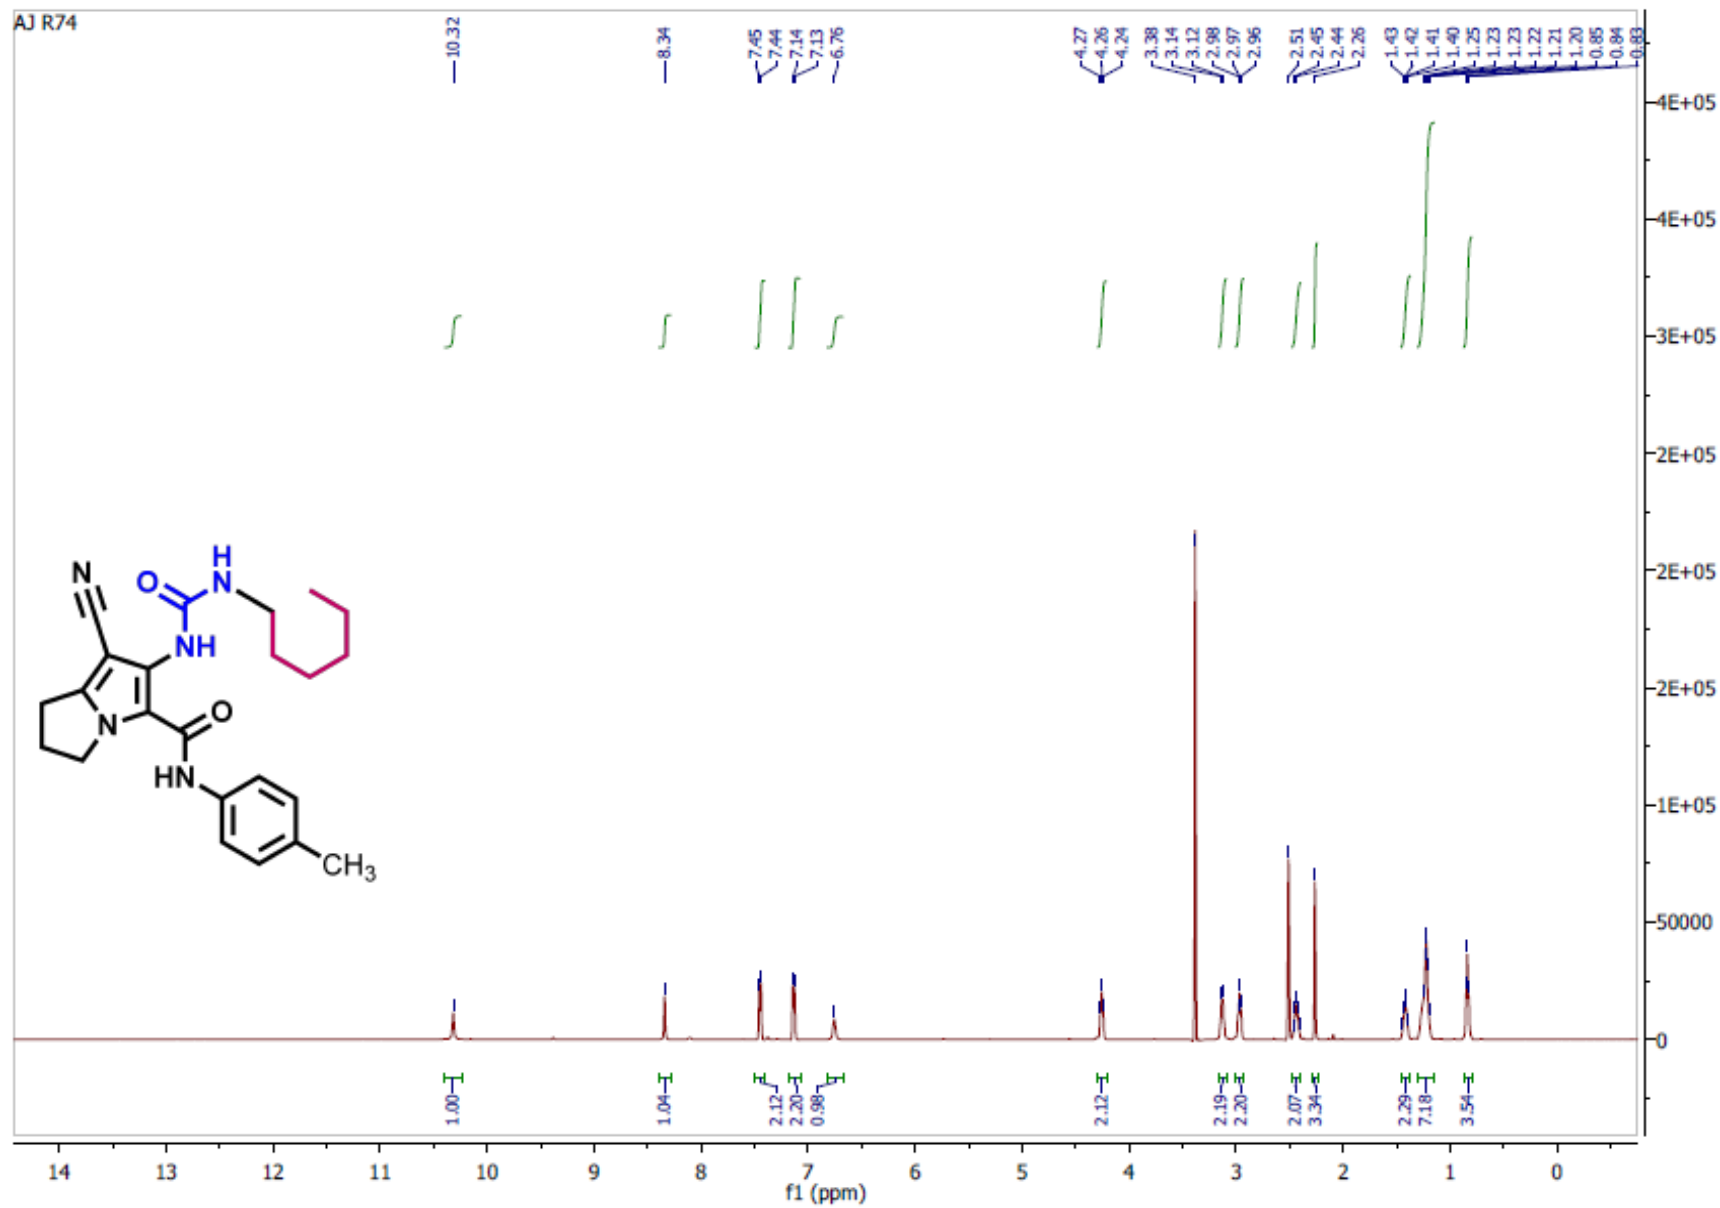

Figure S68. <sup>1</sup>H-NMR (DMSO, 500 MHz, δ ppm) spectrum of compound **16b** (zoom on aliphatic Hs).

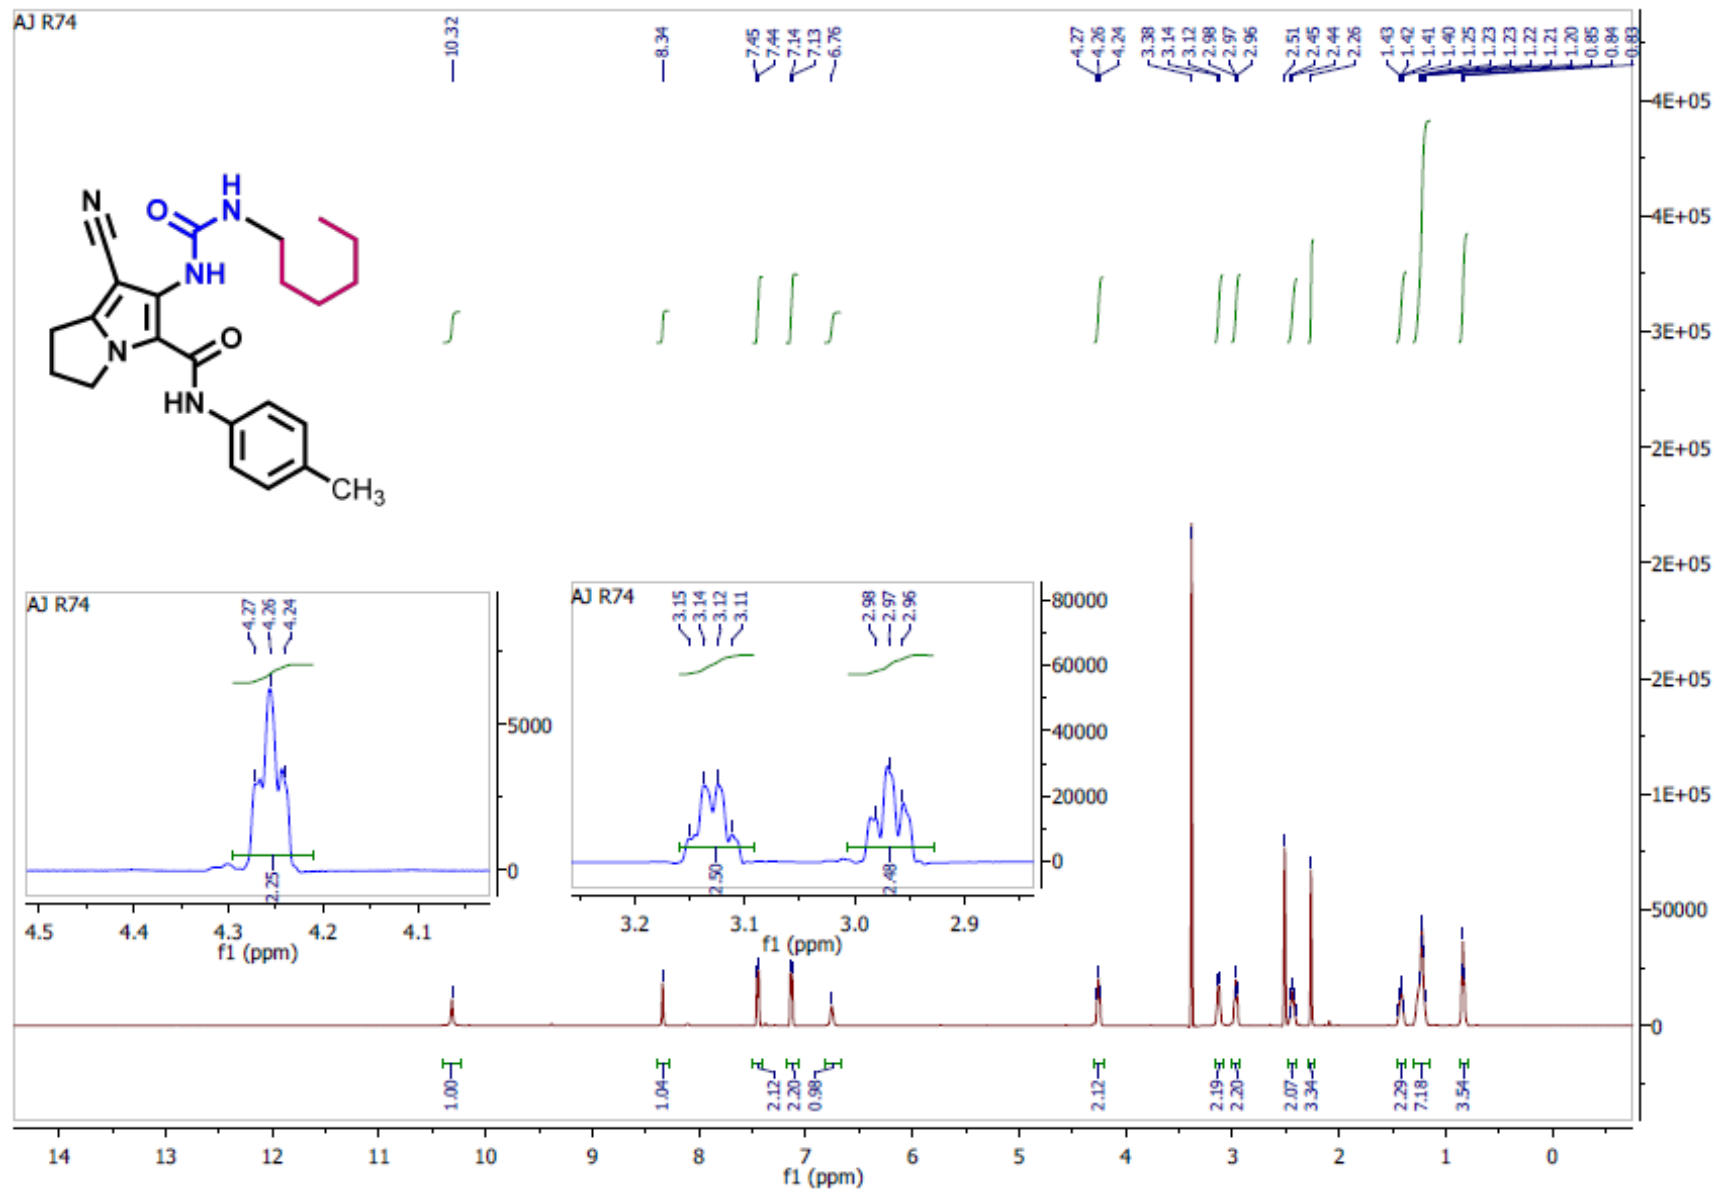

Figure S69. <sup>1</sup>H-NMR (DMSO, 500 MHz, δ ppm) spectrum of compound **16b** (zoom on aliphatic Hs).

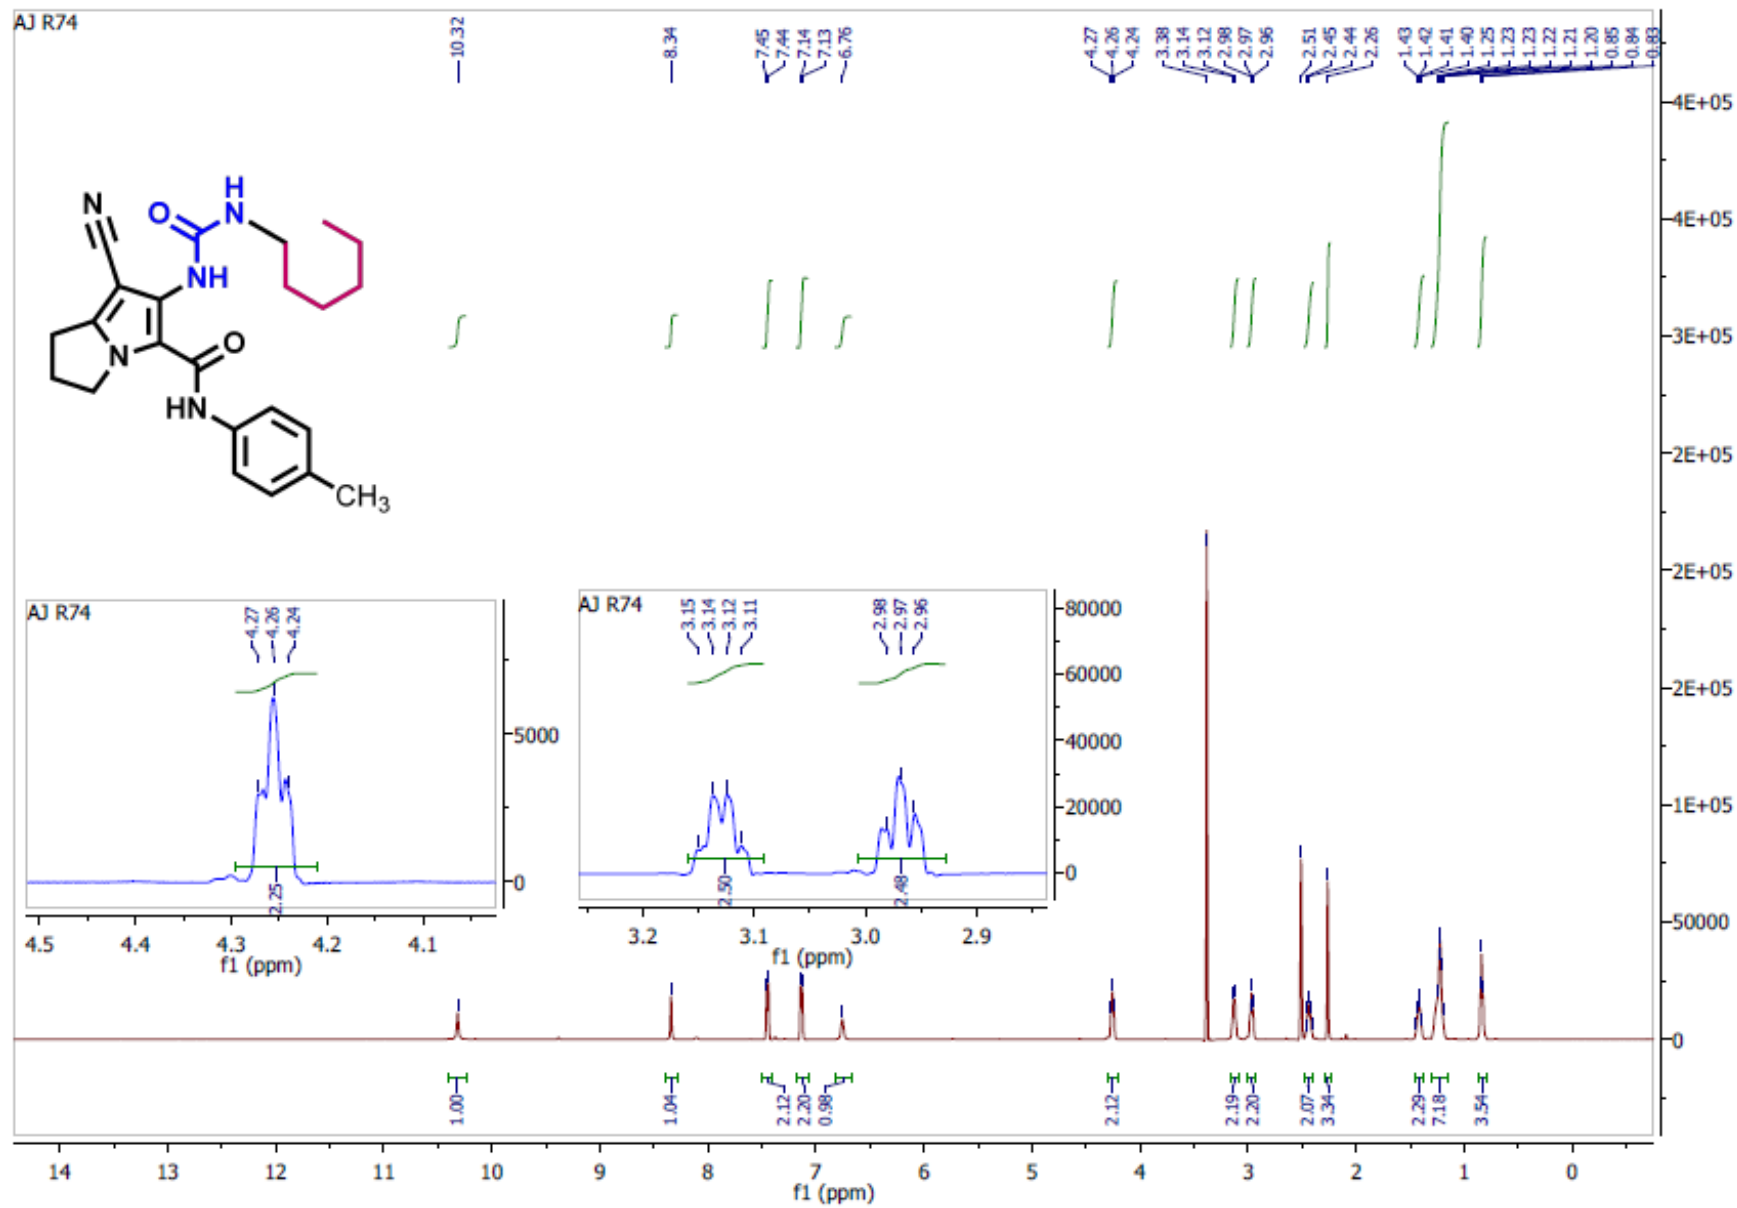

Figure S70.  $^1\text{H-NMR}$  (DMSO, 500 MHz,  $\delta$  ppm) spectrum of compound **16b** (zoom on aromatic Hs).

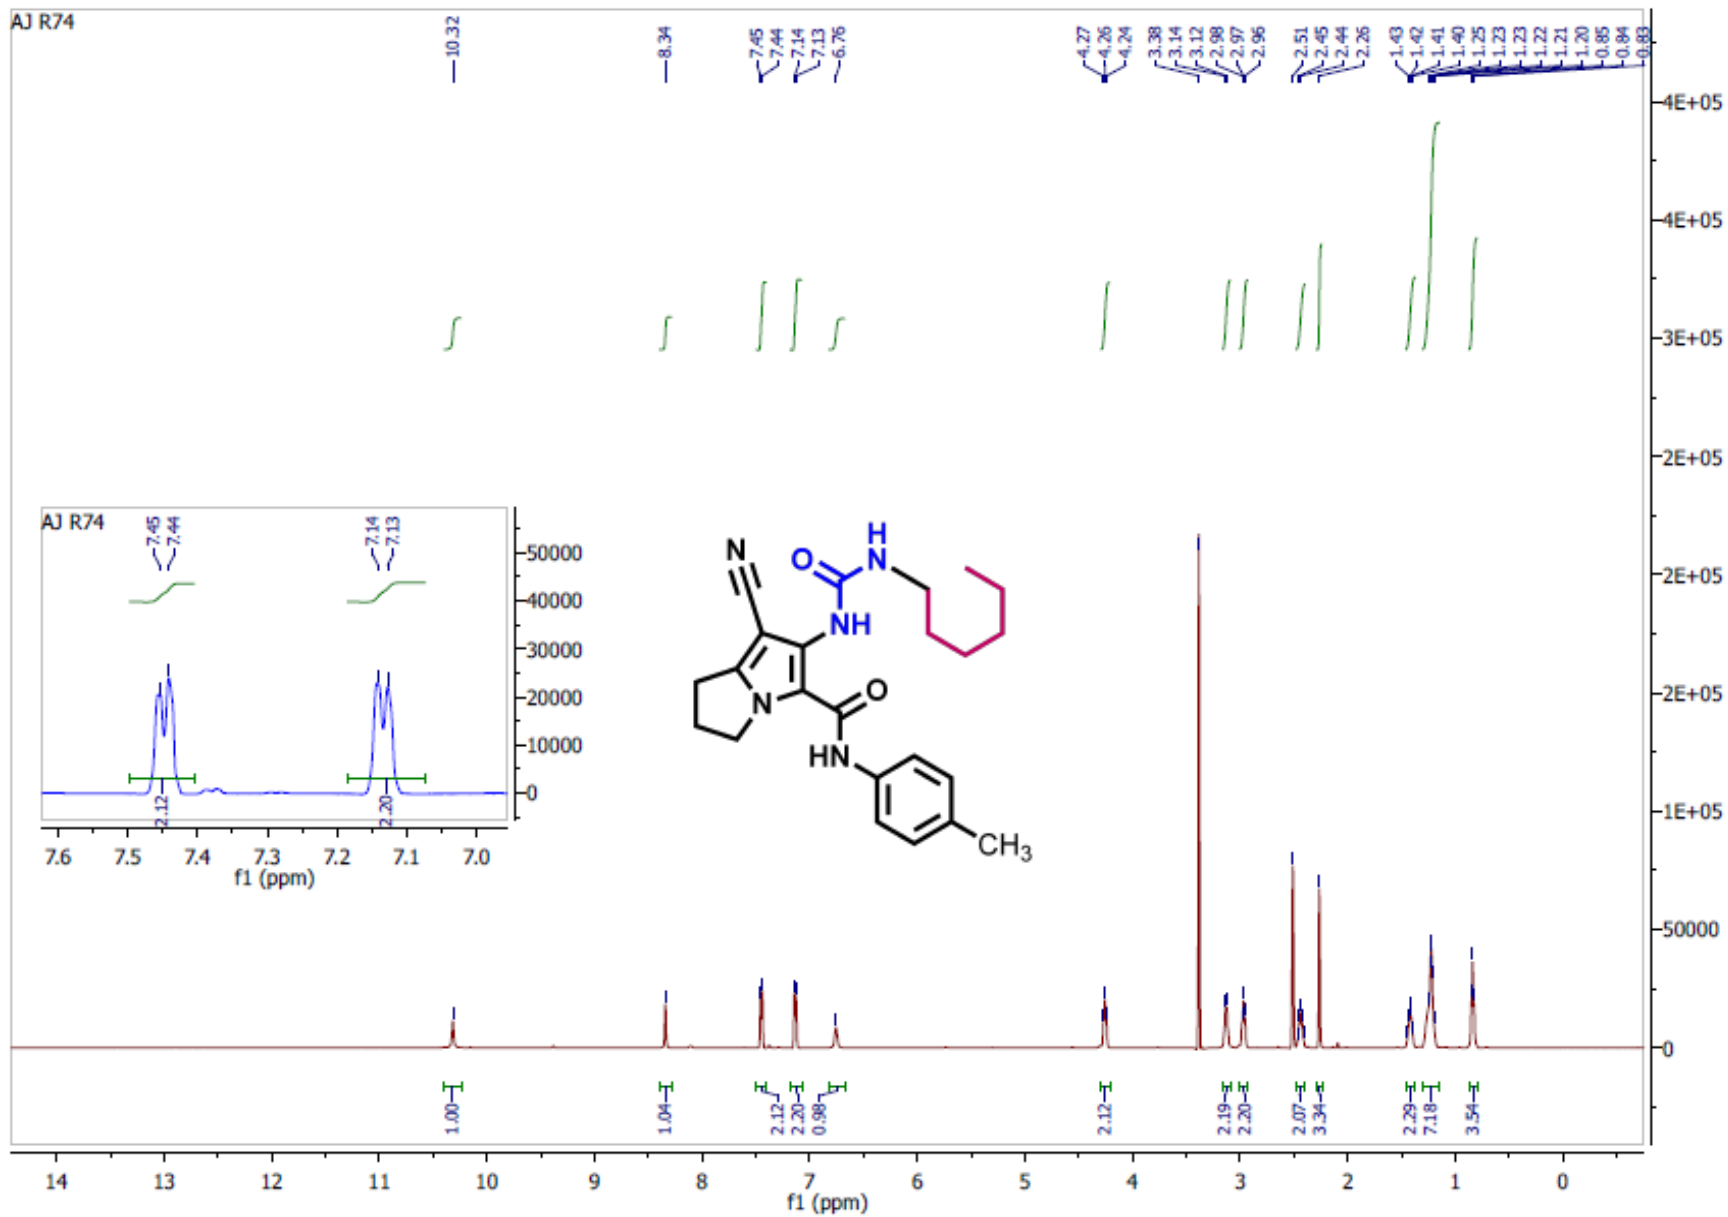

Figure S71.  $^{13}\text{C}$ -NMR (DMSO, 125 MHz,  $\delta$  ppm) spectrum of compound **16b**.

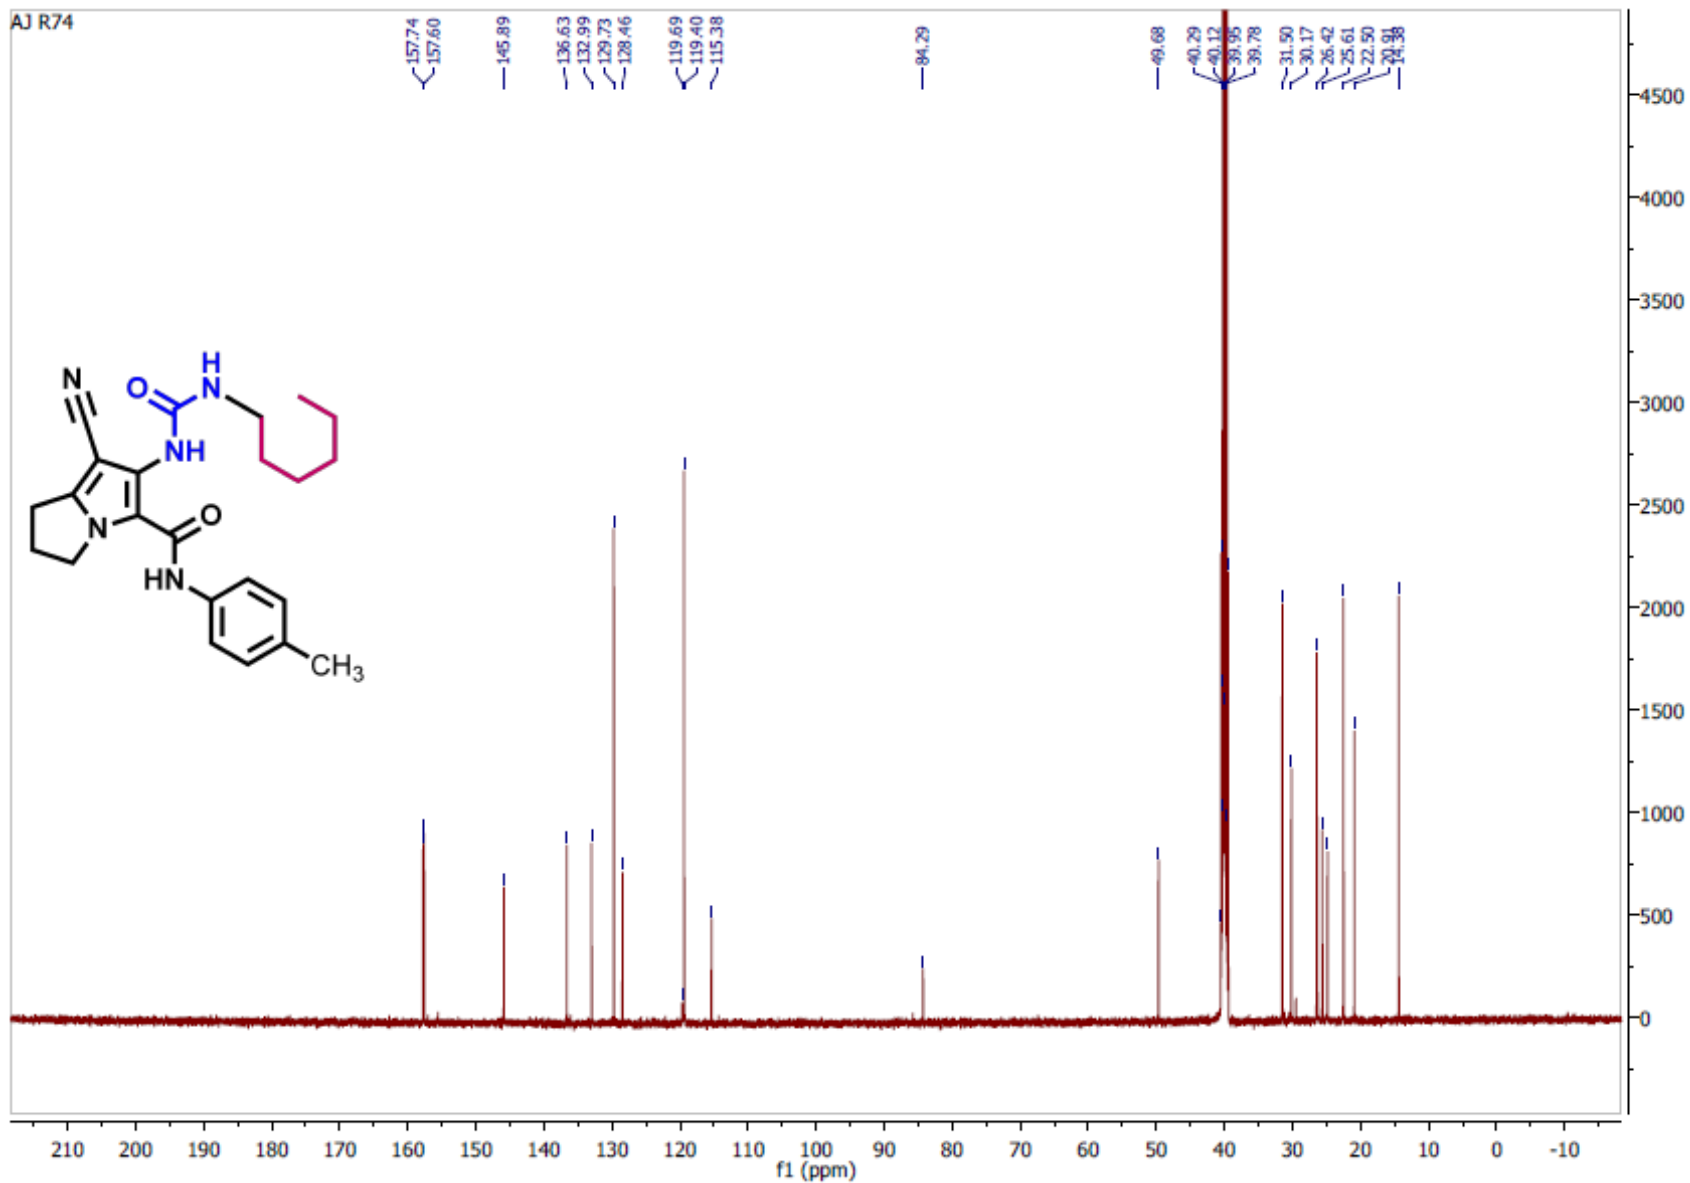

Figure S72.  $^{13}\text{C}$ -NMR (DMSO, 125 MHz,  $\delta$  ppm) spectrum of compound **16b** (zoom on aliphatic Cs).

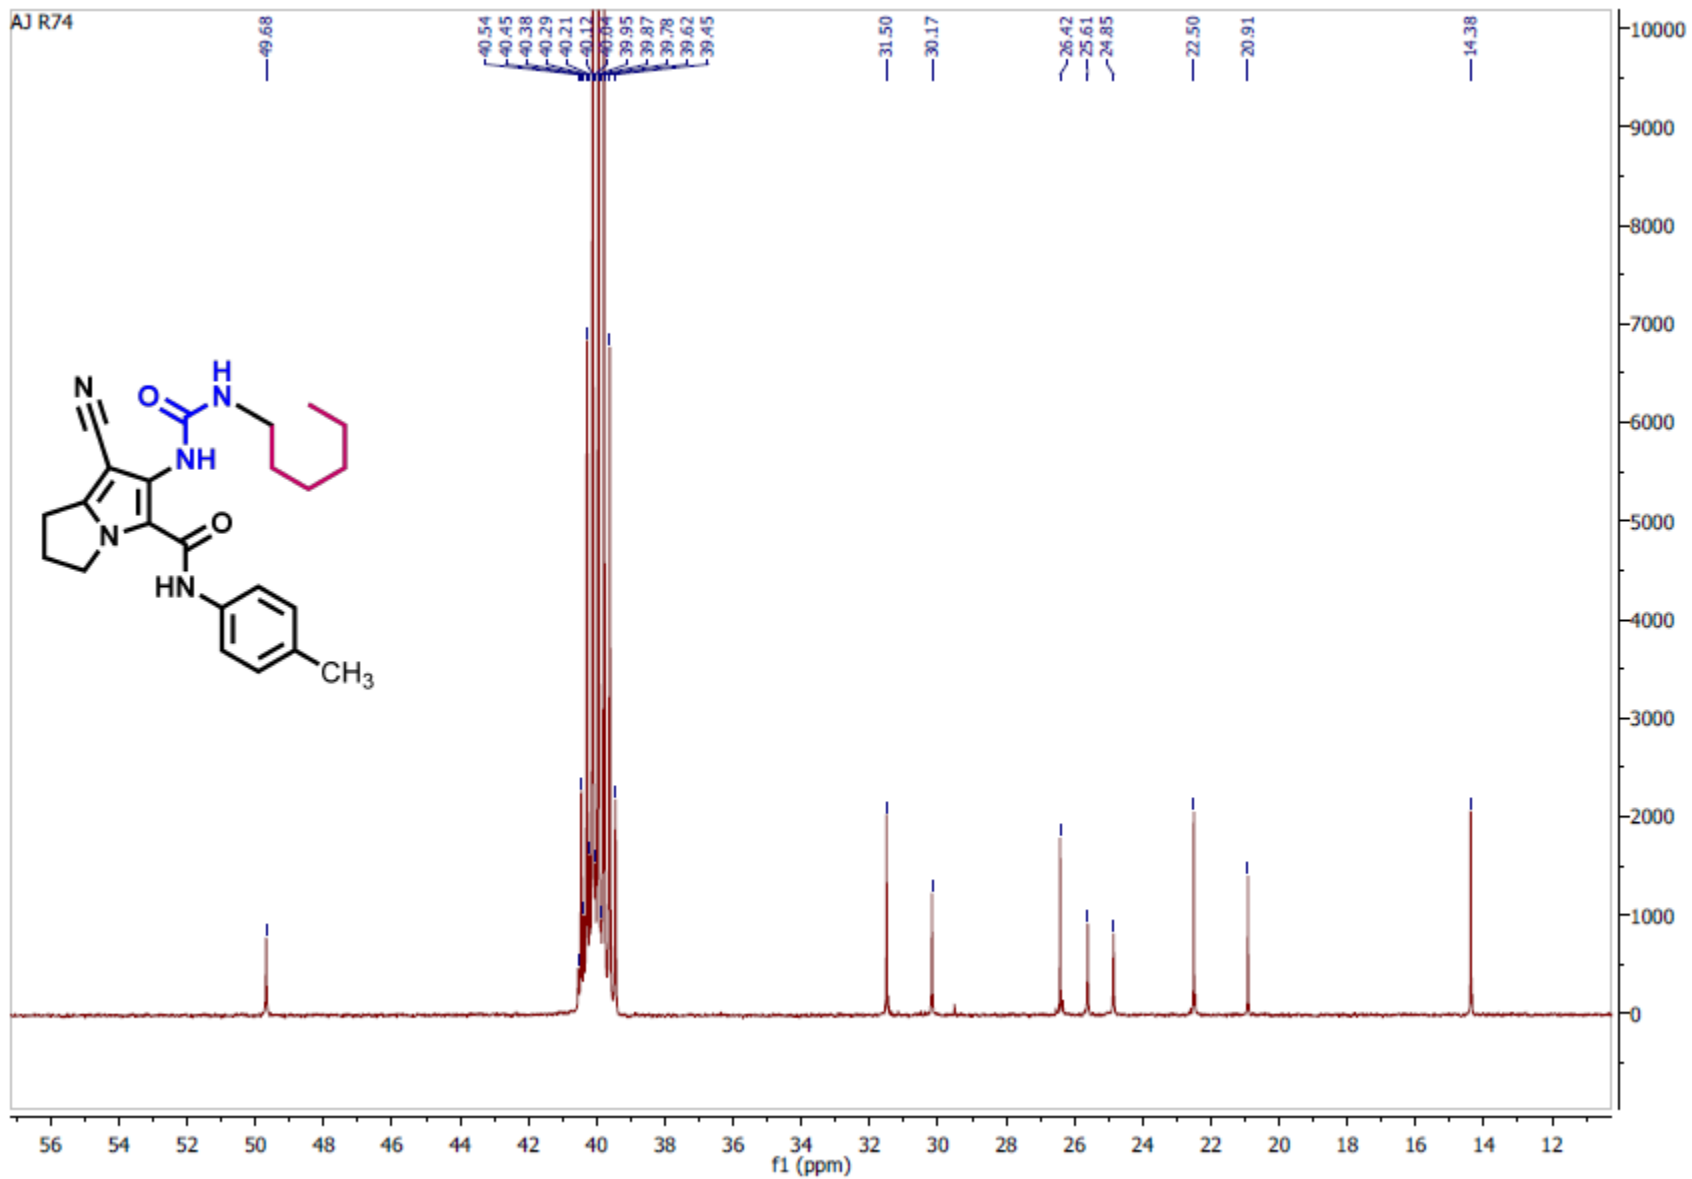



Figure S73.  $^{13}\text{C}$ -NMR (DMSO, 125 MHz,  $\delta$  ppm) spectrum of compound **16b** (zoom on aromatic Cs).

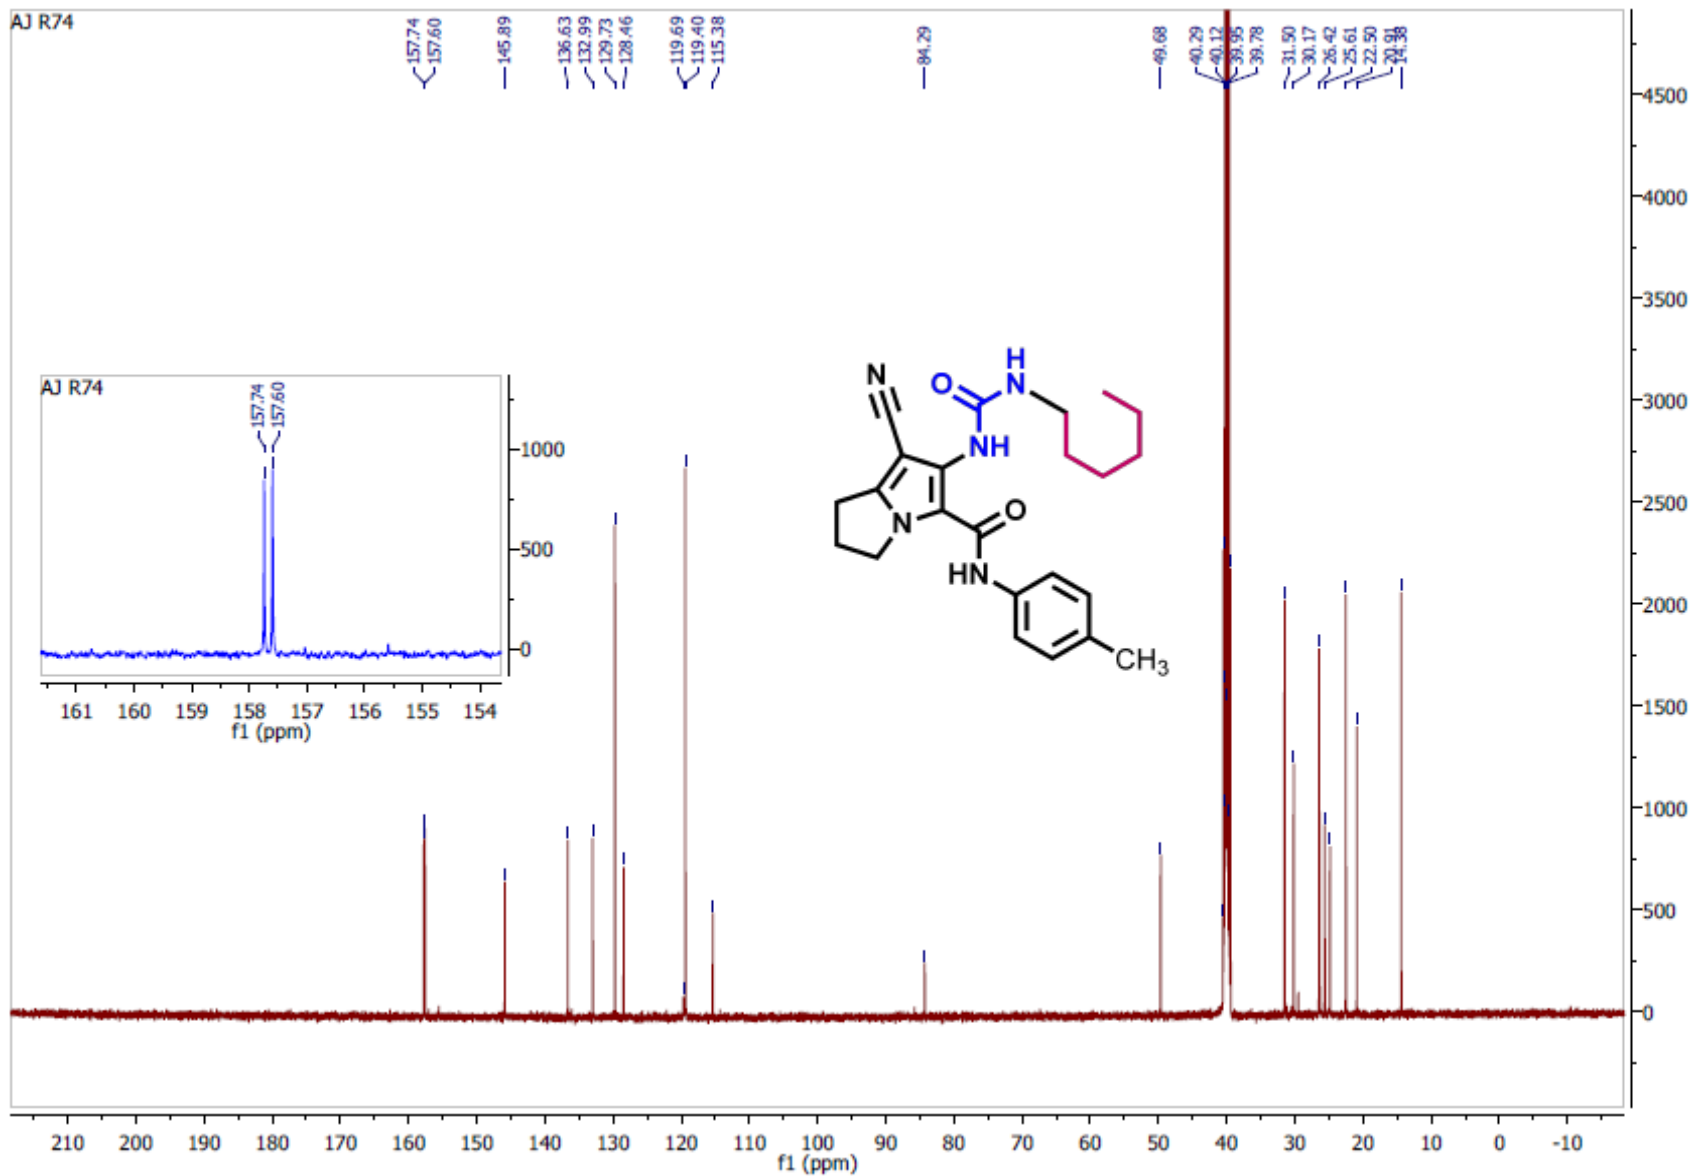

Figure S74. DEPT C<sup>135</sup> (DMSO, 125 MHz,  $\delta$  ppm) of compound **16b**.

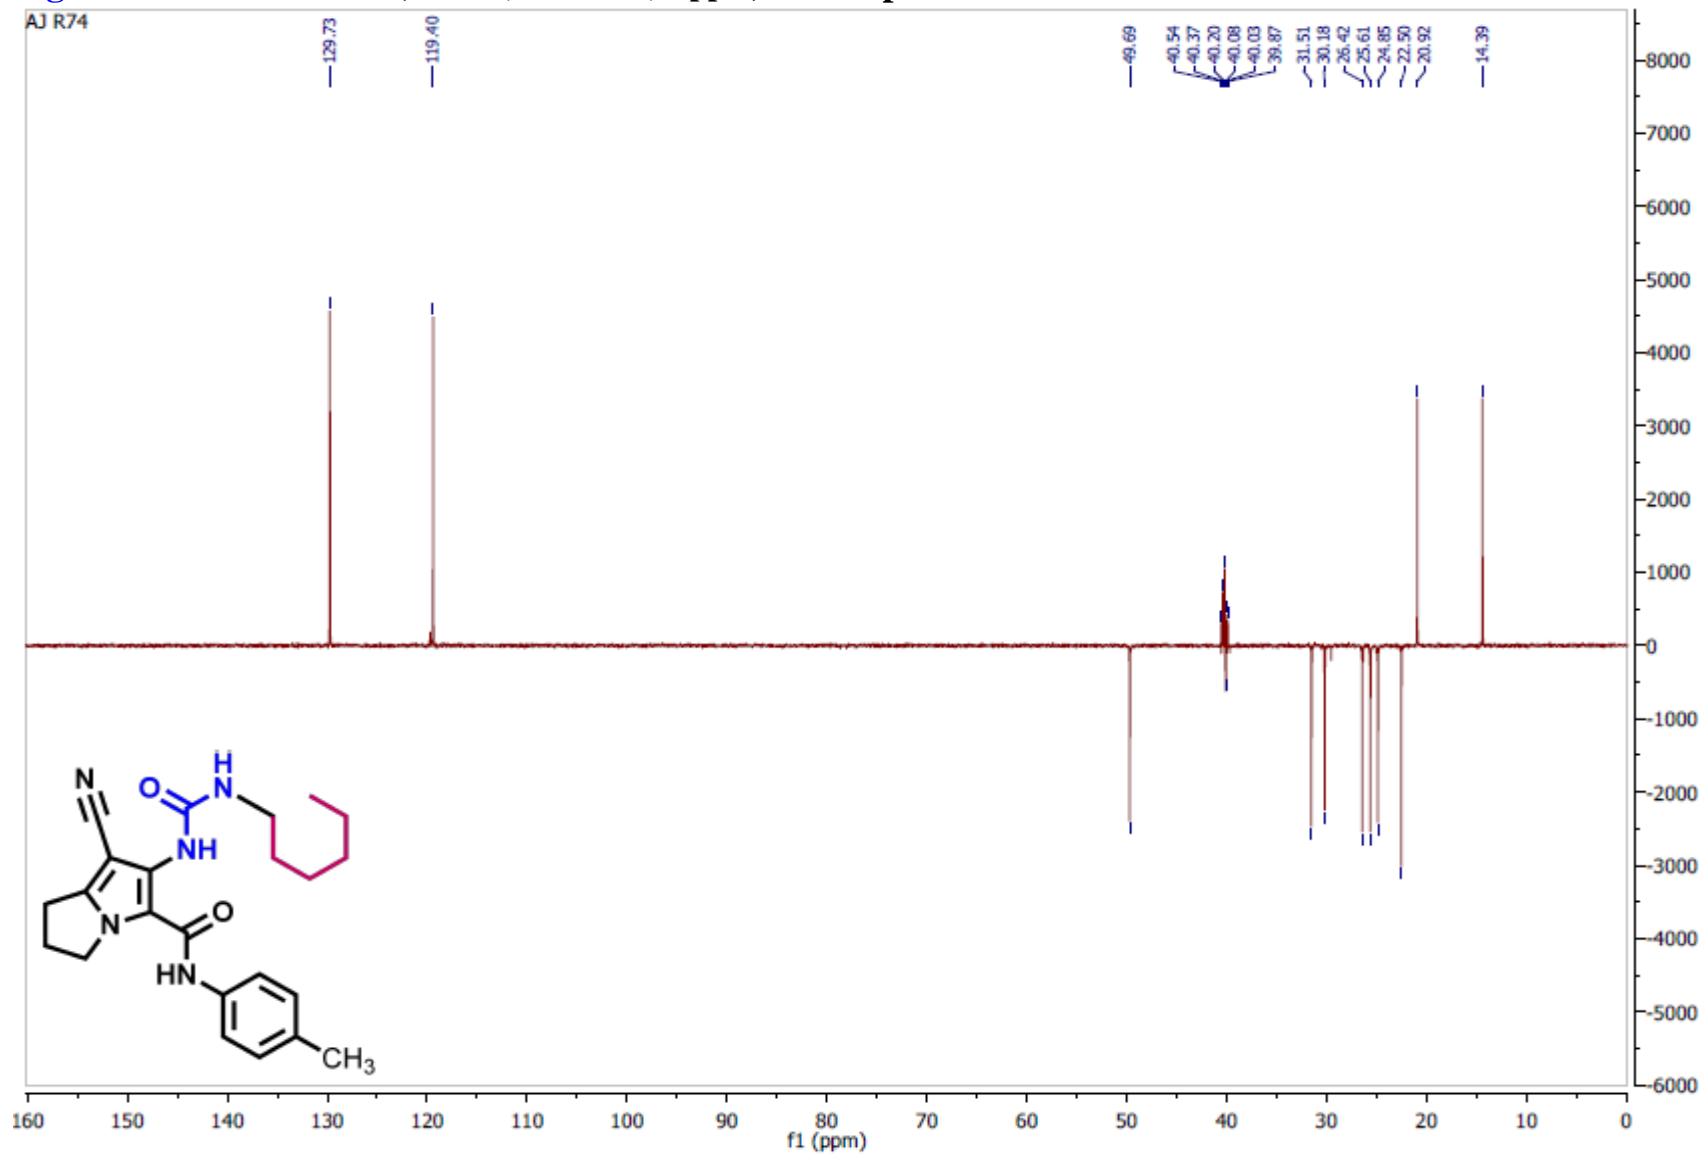

Figure S75. DEPT C<sup>135</sup> (DMSO, 125 MHz,  $\delta$  ppm) of compound **16b** (zoom on aliphatic Cs).

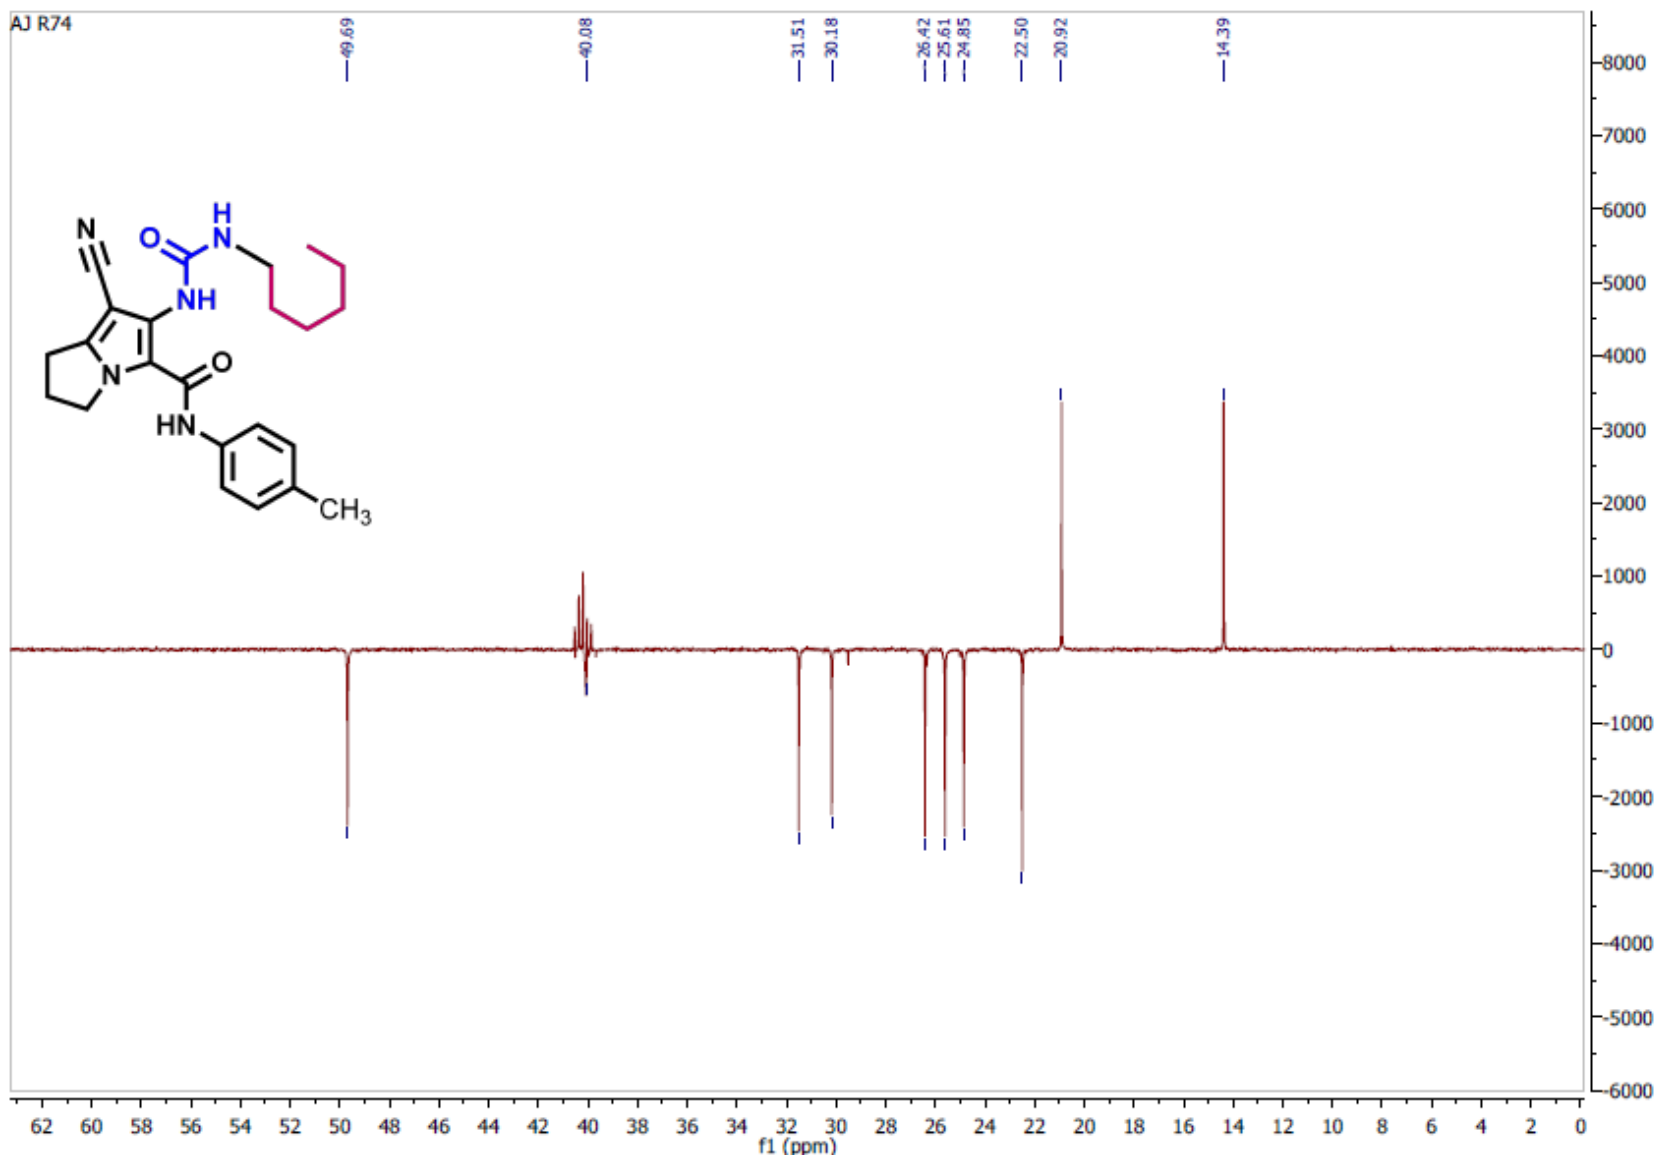

Figure S76. DEPT C<sup>135</sup> (DMSO, 125 MHz,  $\delta$  ppm) of compound **16b** (zoom on aliphatic Cs).

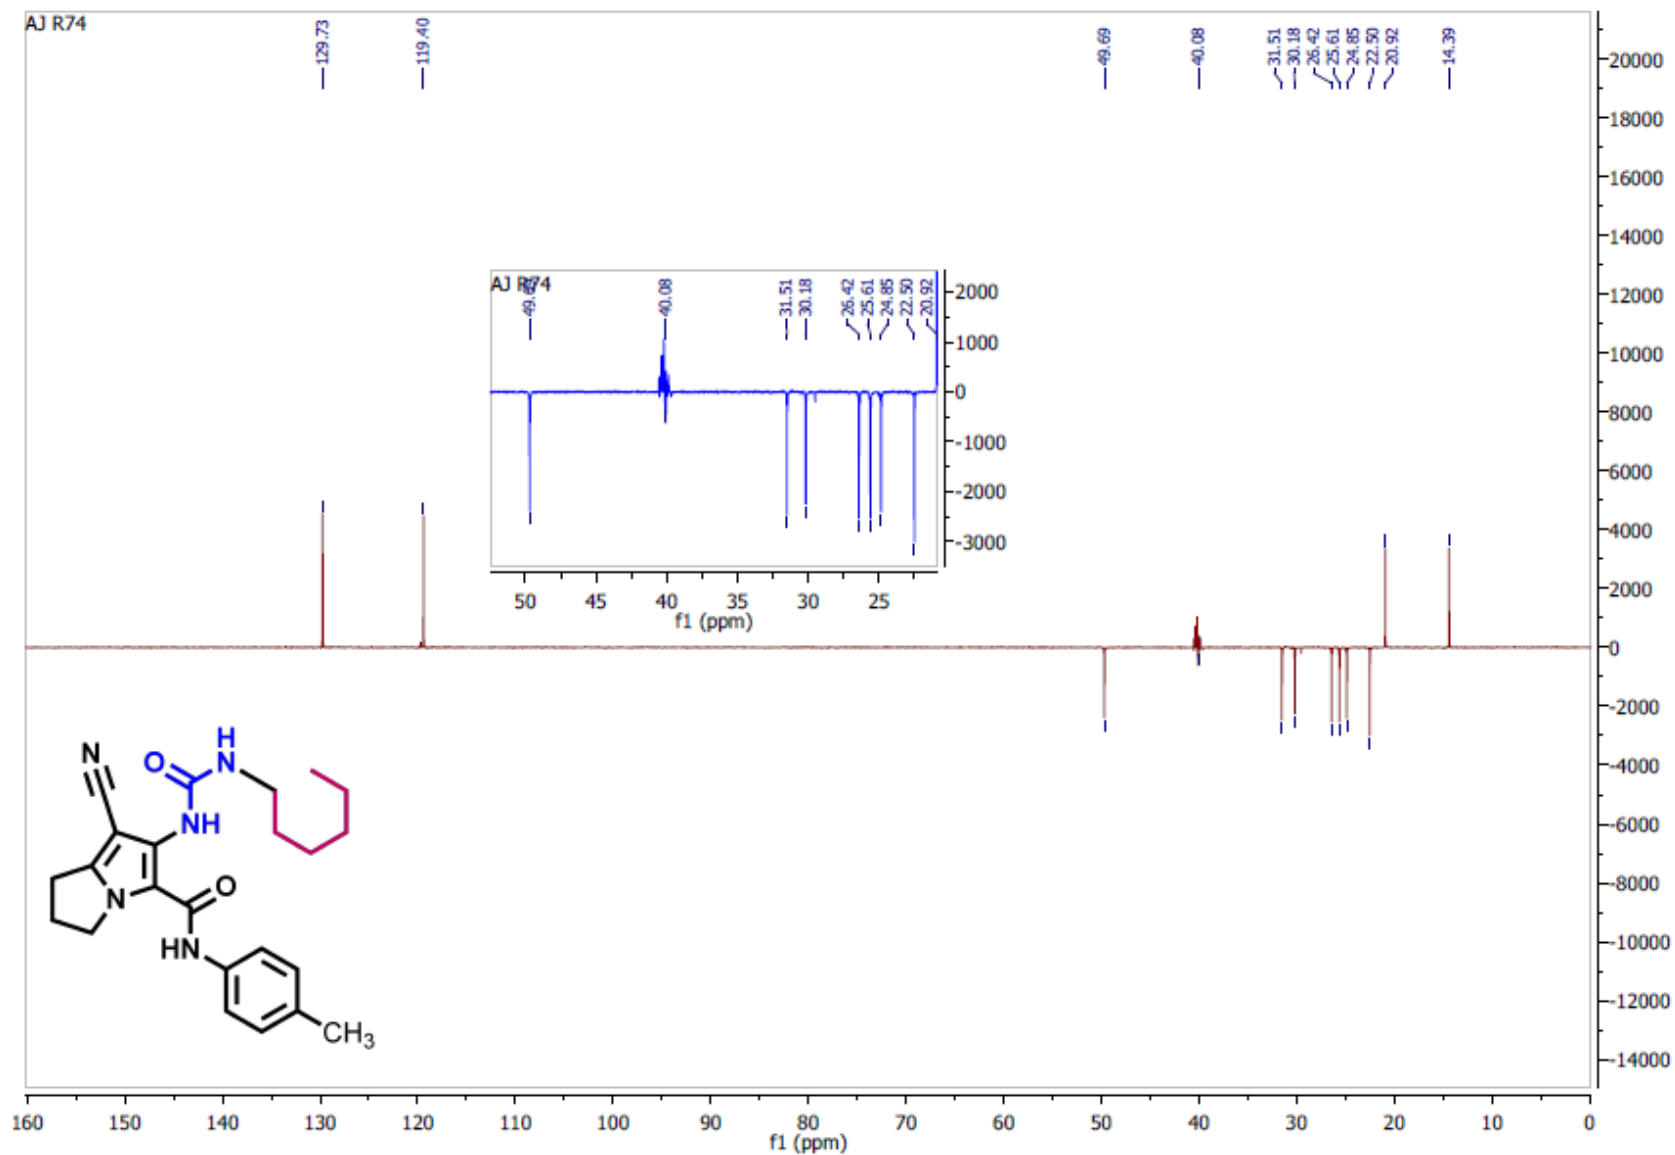

Figure S77. <sup>1</sup>H-NMR (DMSO, 500 MHz, δ ppm) spectrum of compound 16c.

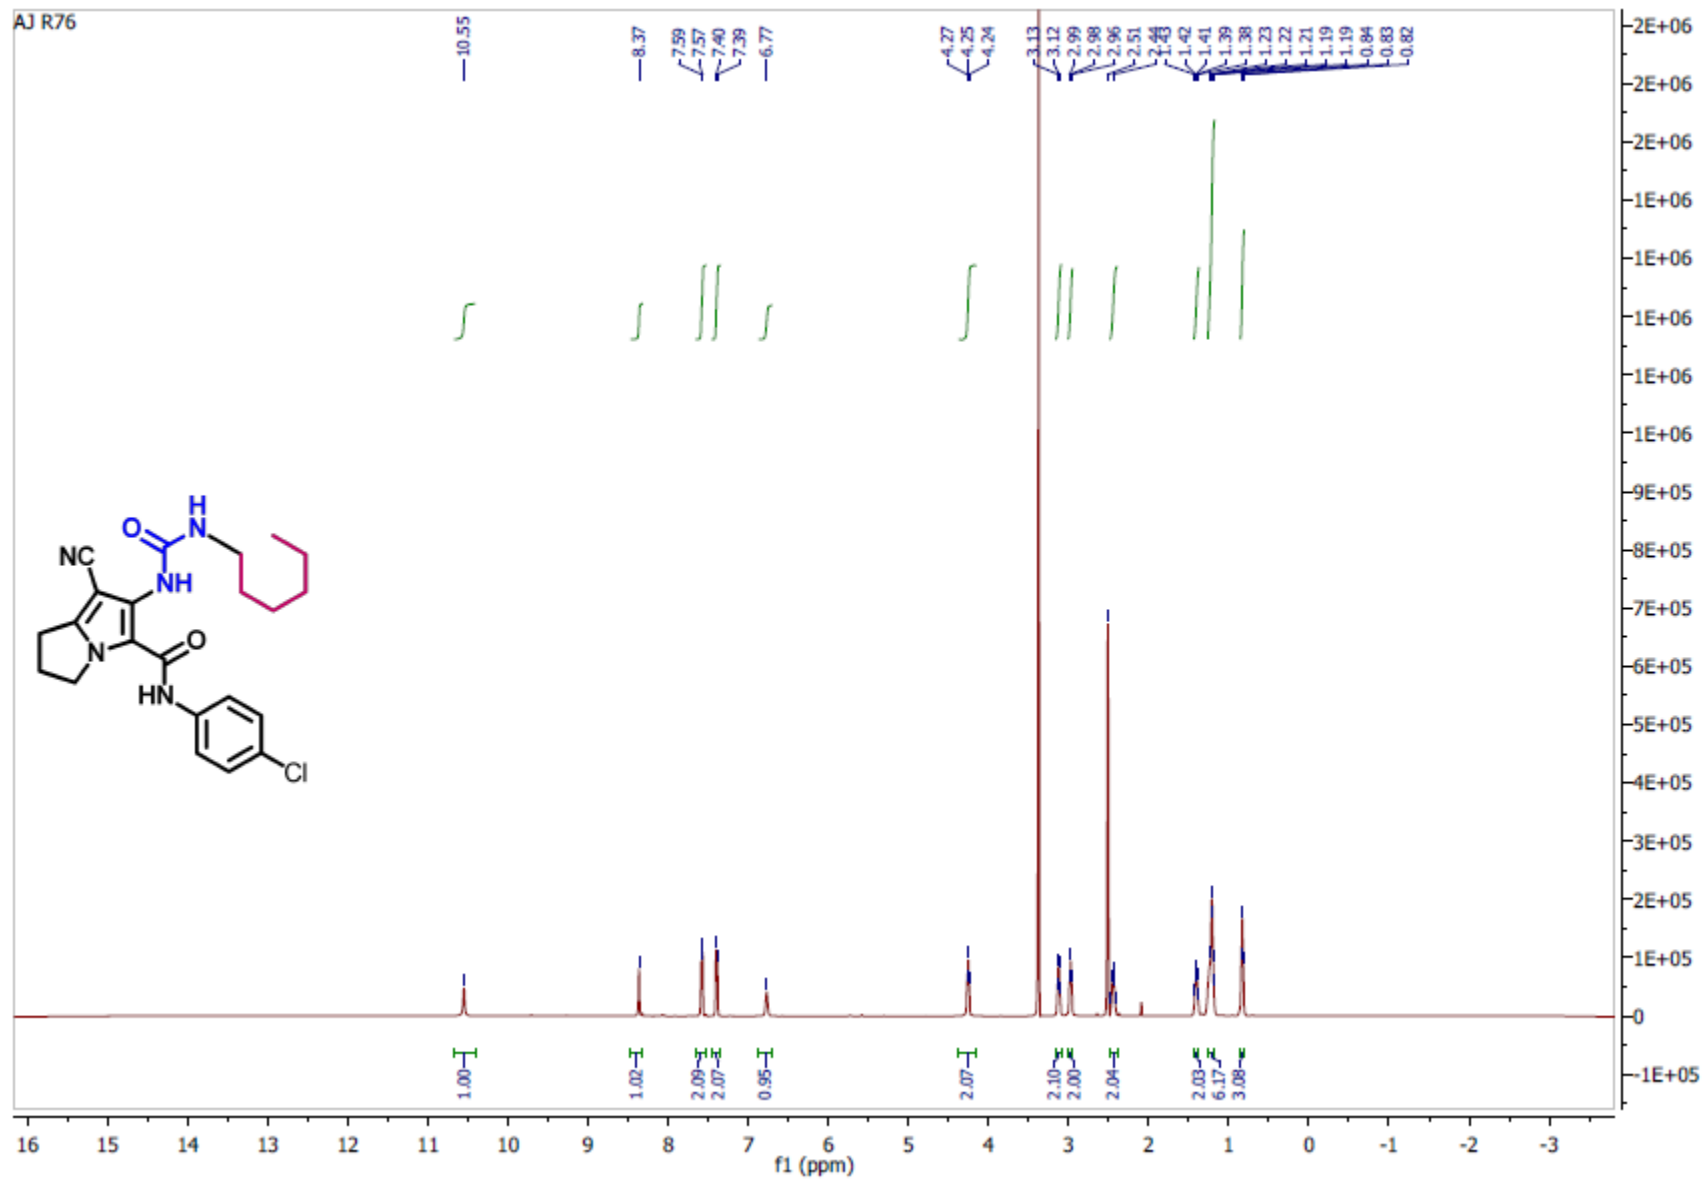





Figure S80. <sup>1</sup>H-NMR (DMSO, 500 MHz, δ ppm) spectrum of compound **16c** (zoom on aliphatic/aromatic Hs).

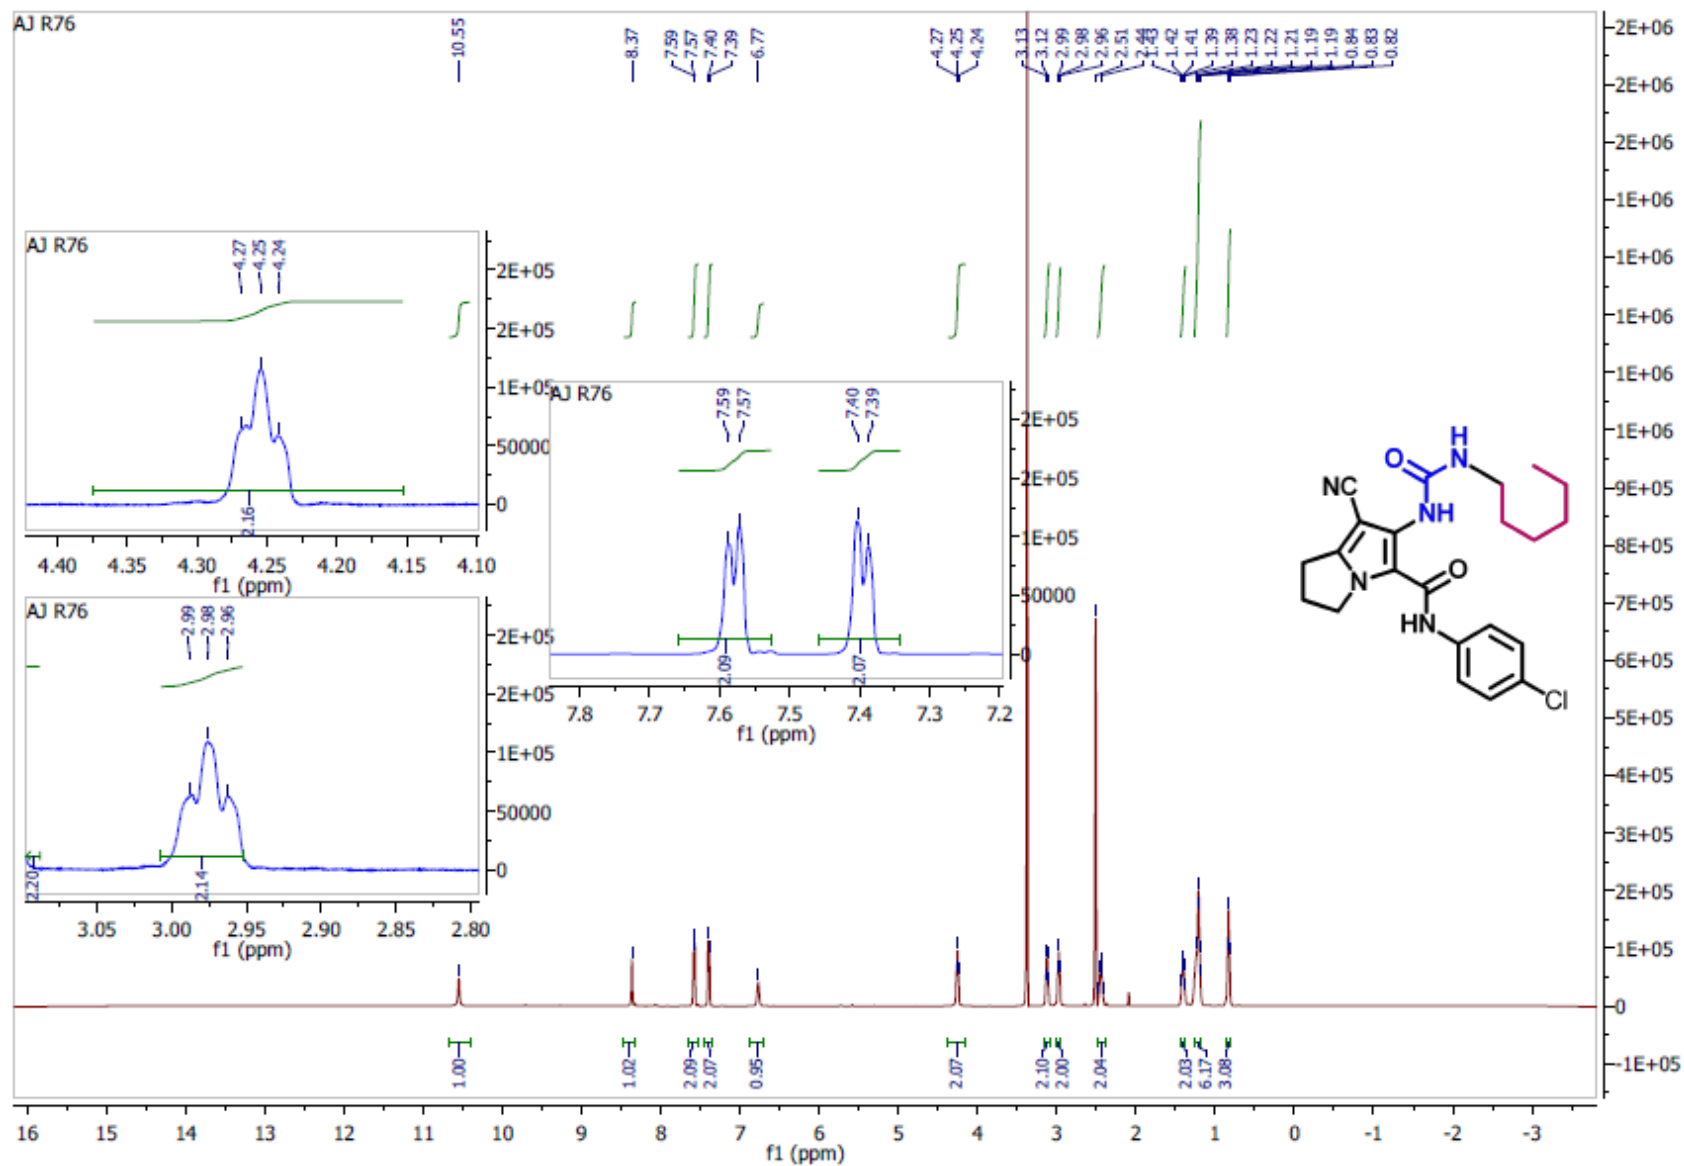



Figure S81.  $^{13}\text{C}$ -NMR (DMSO, 125 MHz,  $\delta$  ppm) spectrum of compound **16c**.

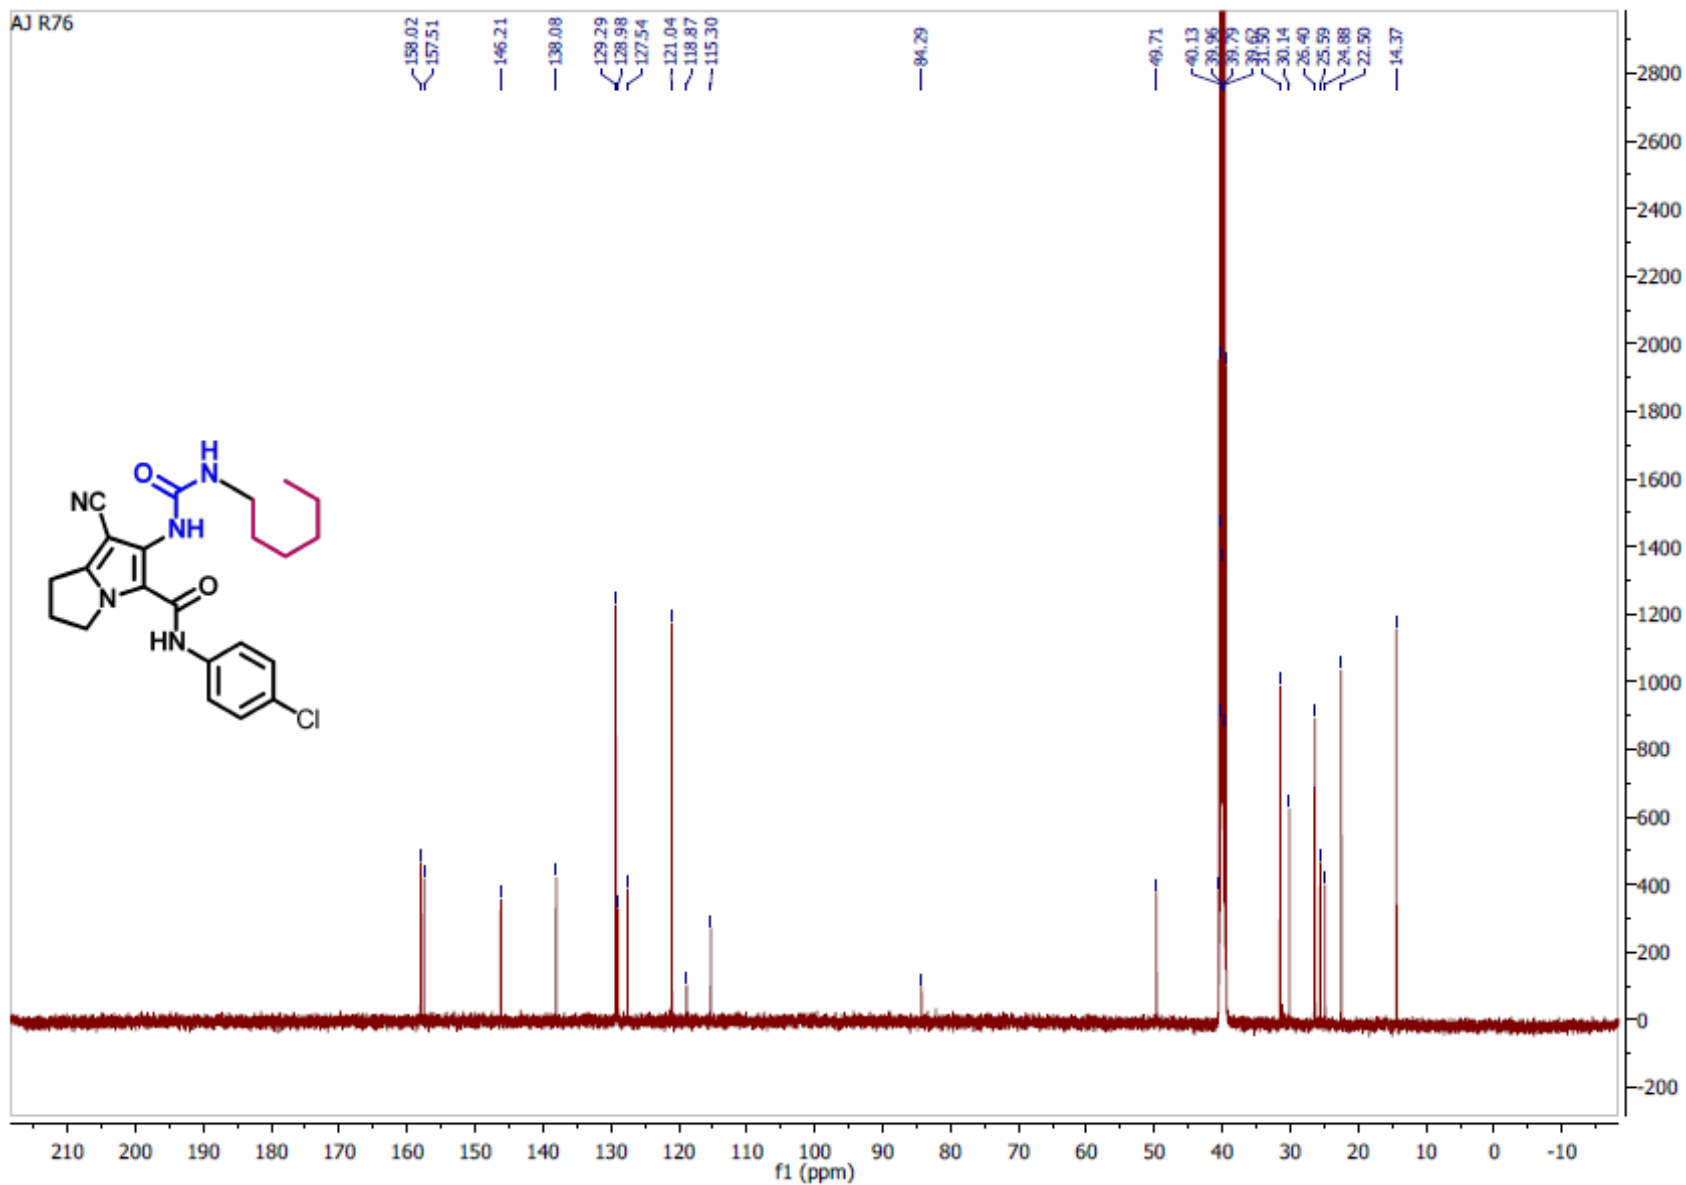

**Figure S82.**  $^{13}\text{C}$ -NMR (DMSO, 125 MHz,  $\delta$  ppm) spectrum of compound **16c** (zoom on aliphatic/aromatic Cs).

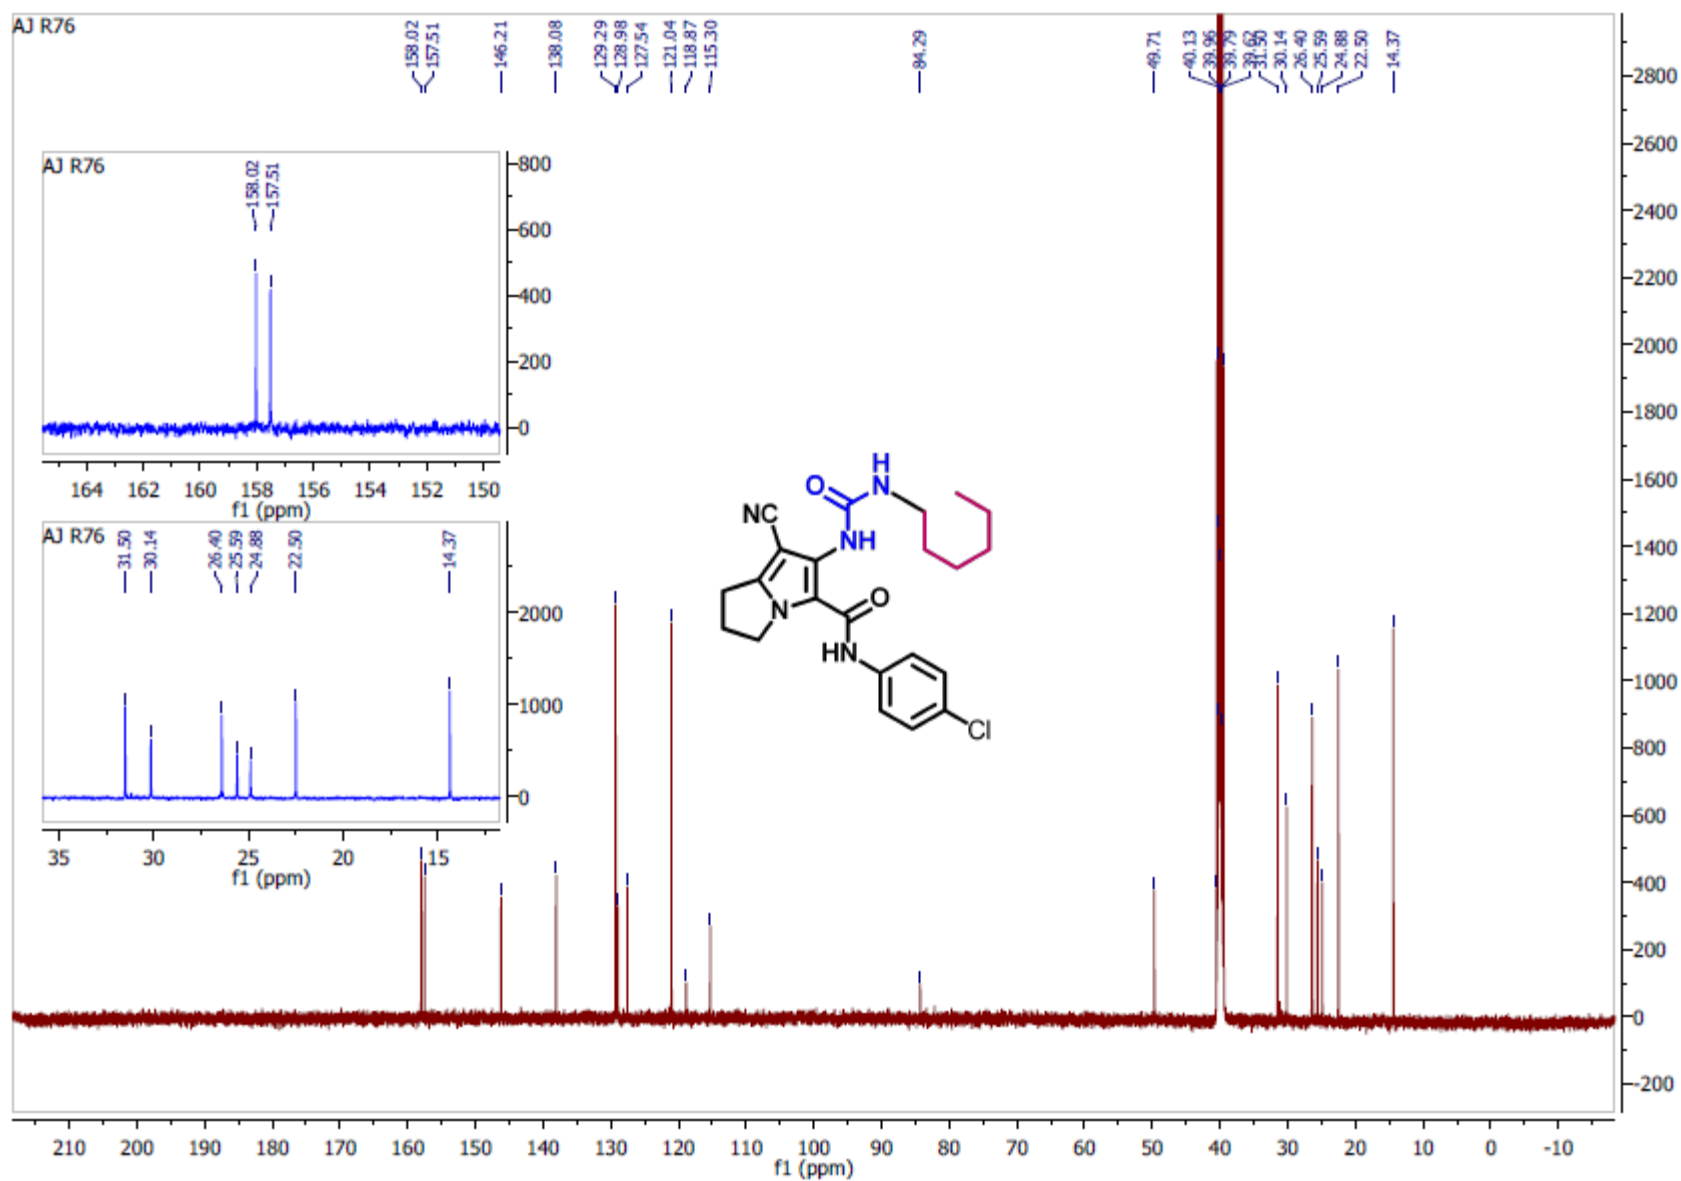

**Figure S83.** DEPT  $C^{135}$  (DMSO, 125 MHz,  $\delta$  ppm) of compound **16c**.

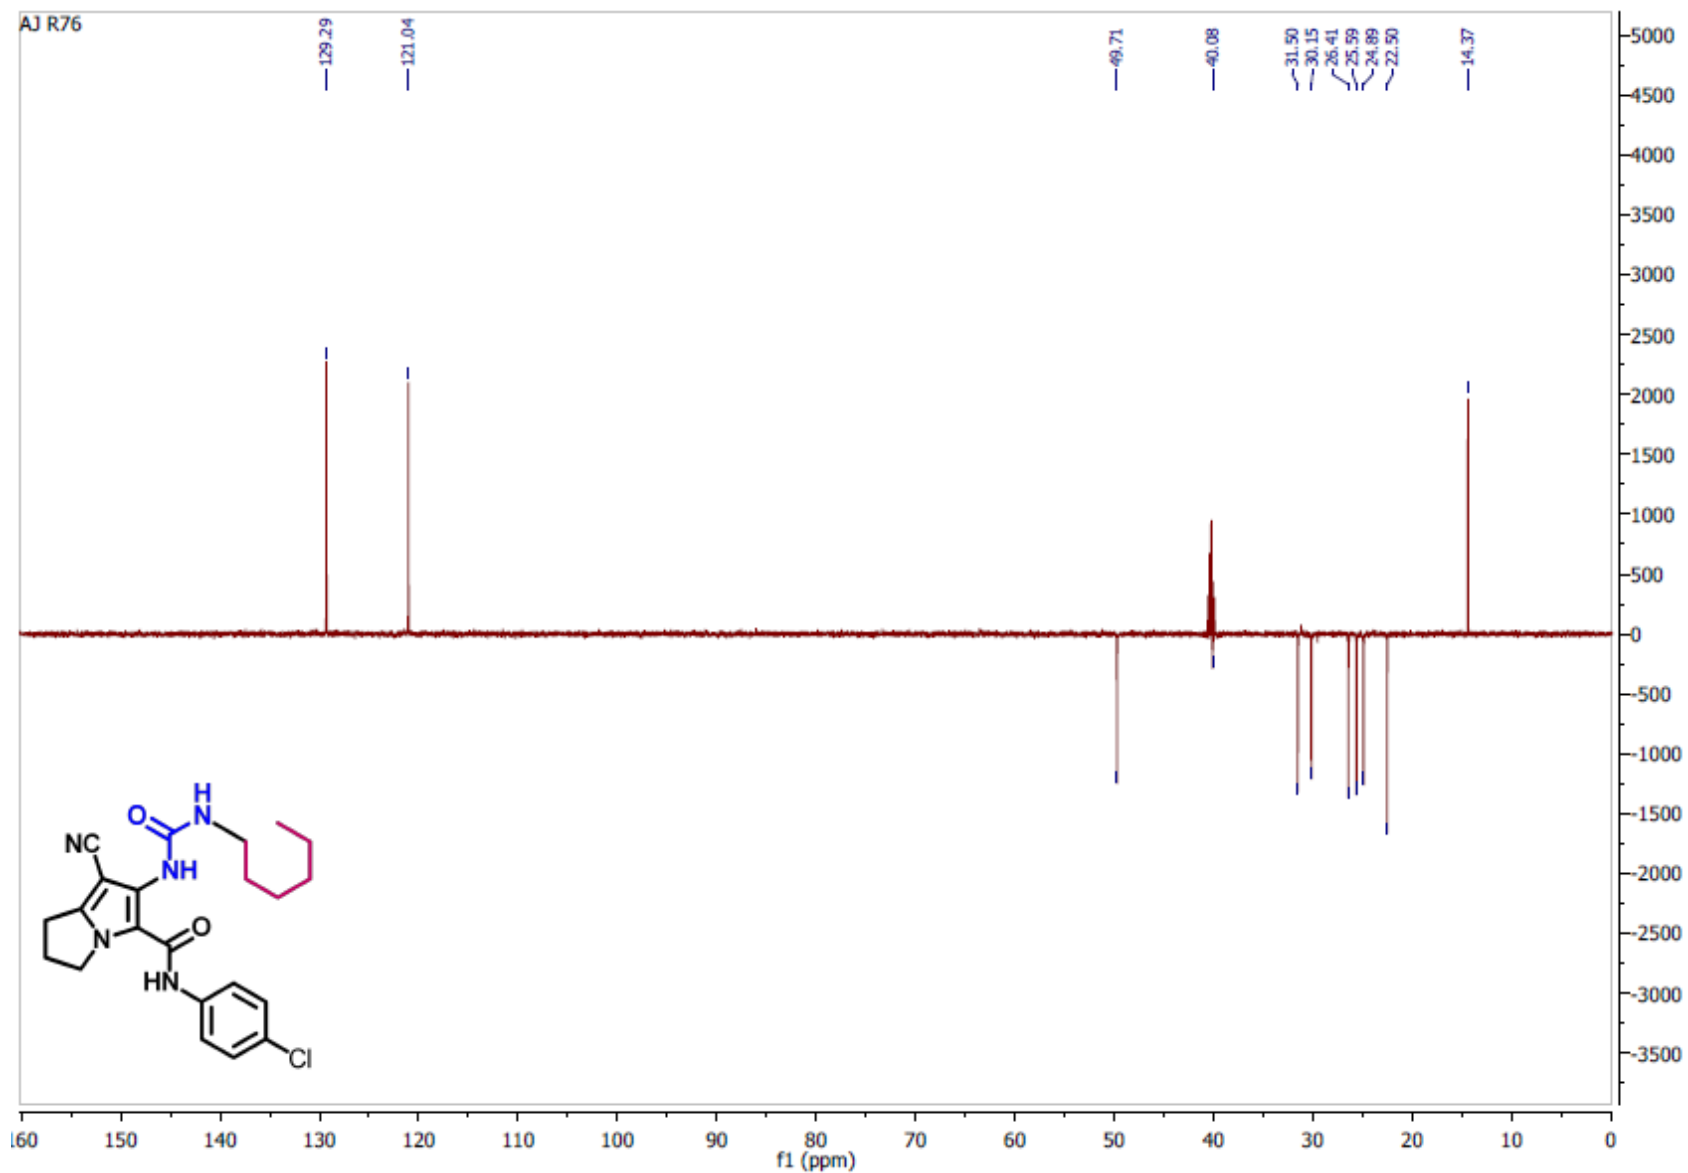

**Figure S84.**  $^1\text{H-NMR}$  (DMSO, 500 MHz,  $\delta$  ppm) spectrum of compound **17a**.

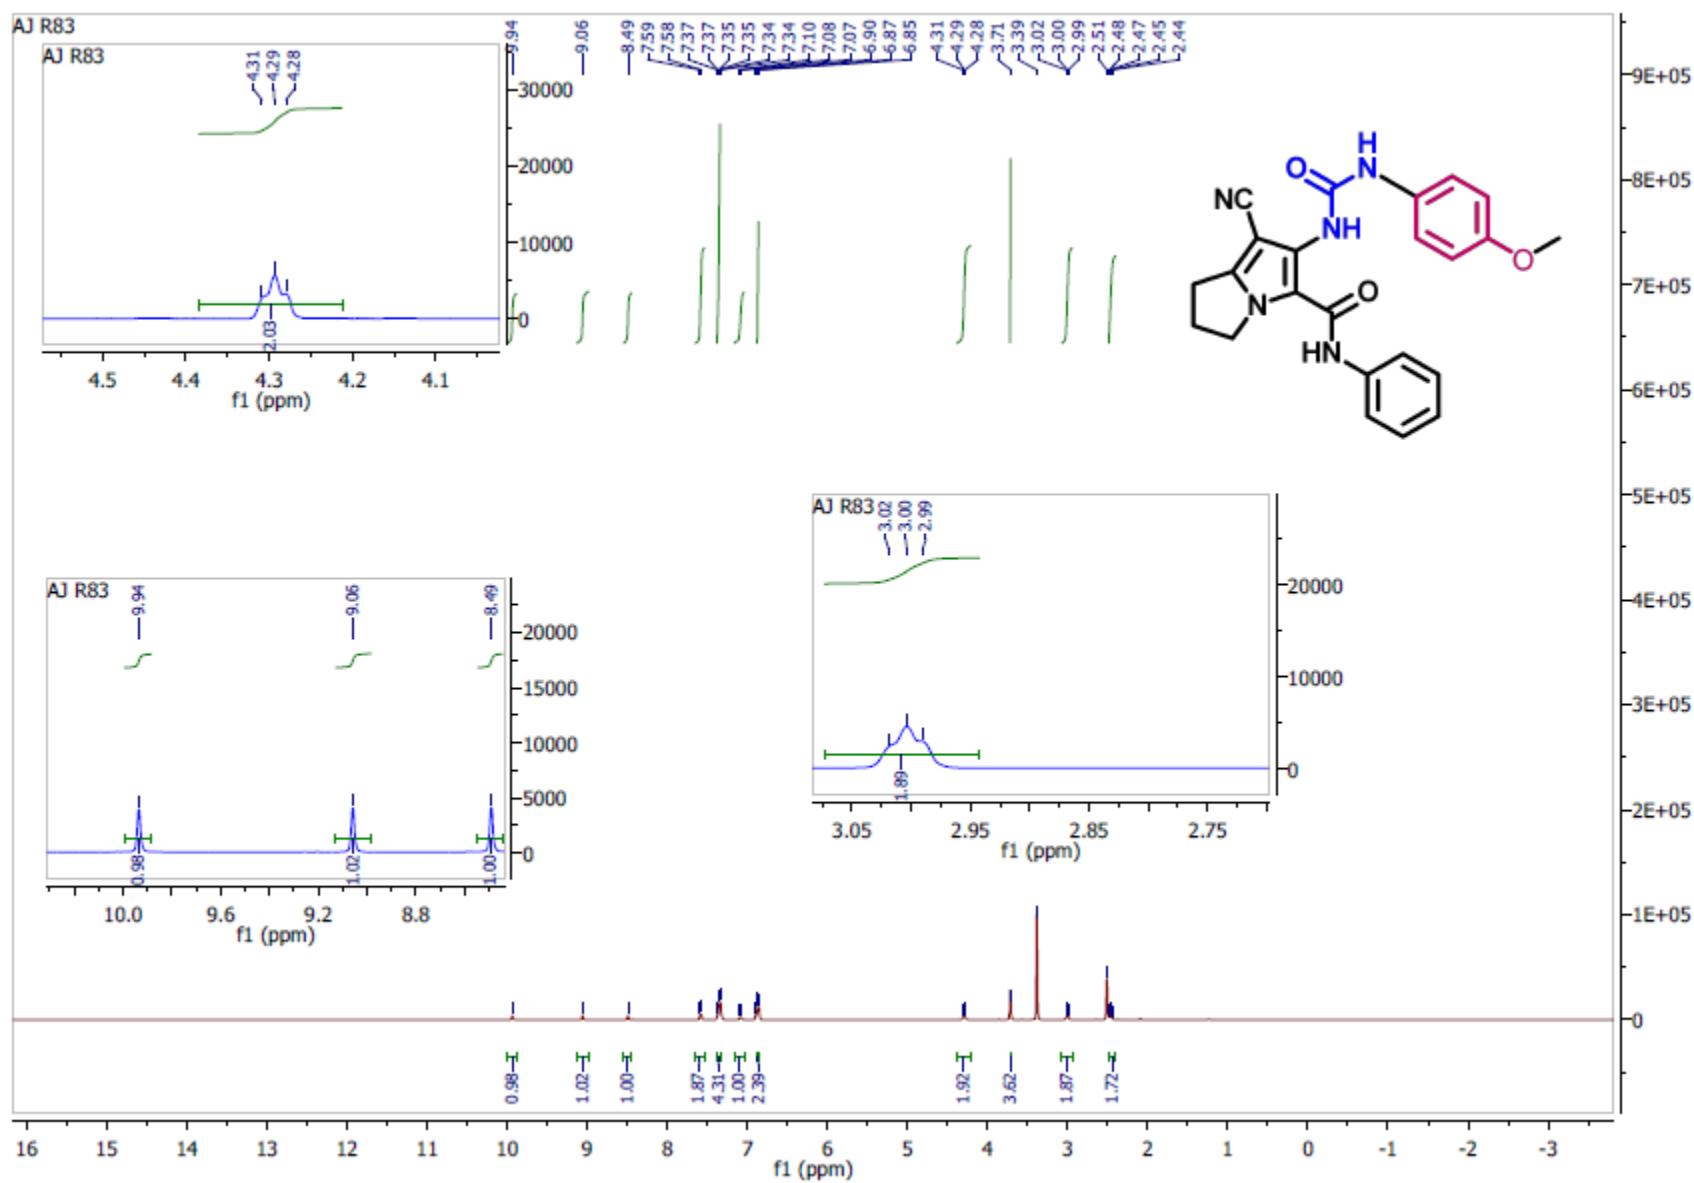

**Figure S85.**  $^{13}\text{C}$ -NMR (DMSO, 125 MHz,  $\delta$  ppm) spectrum of compound **17a**.

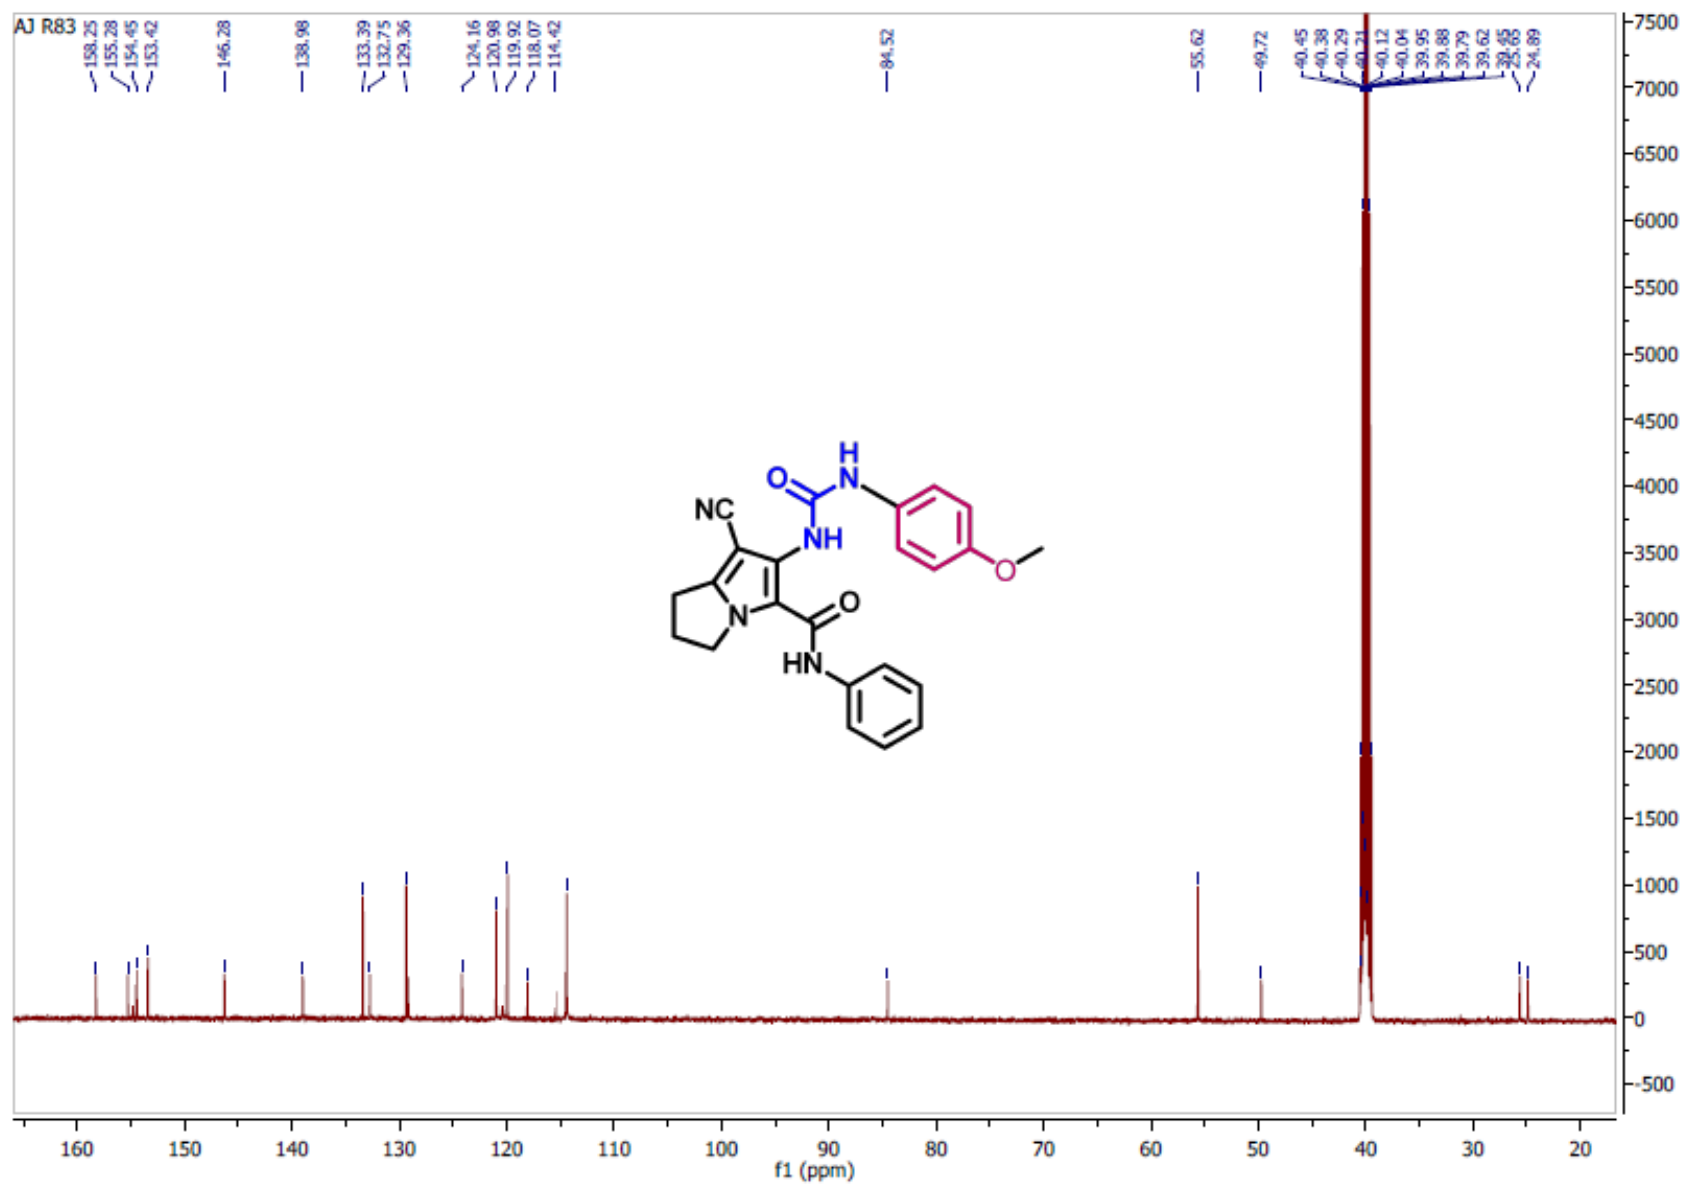

Figure S86. DEPT C<sup>135</sup> (DMSO, 125 MHz,  $\delta$  ppm) of compound 17a.

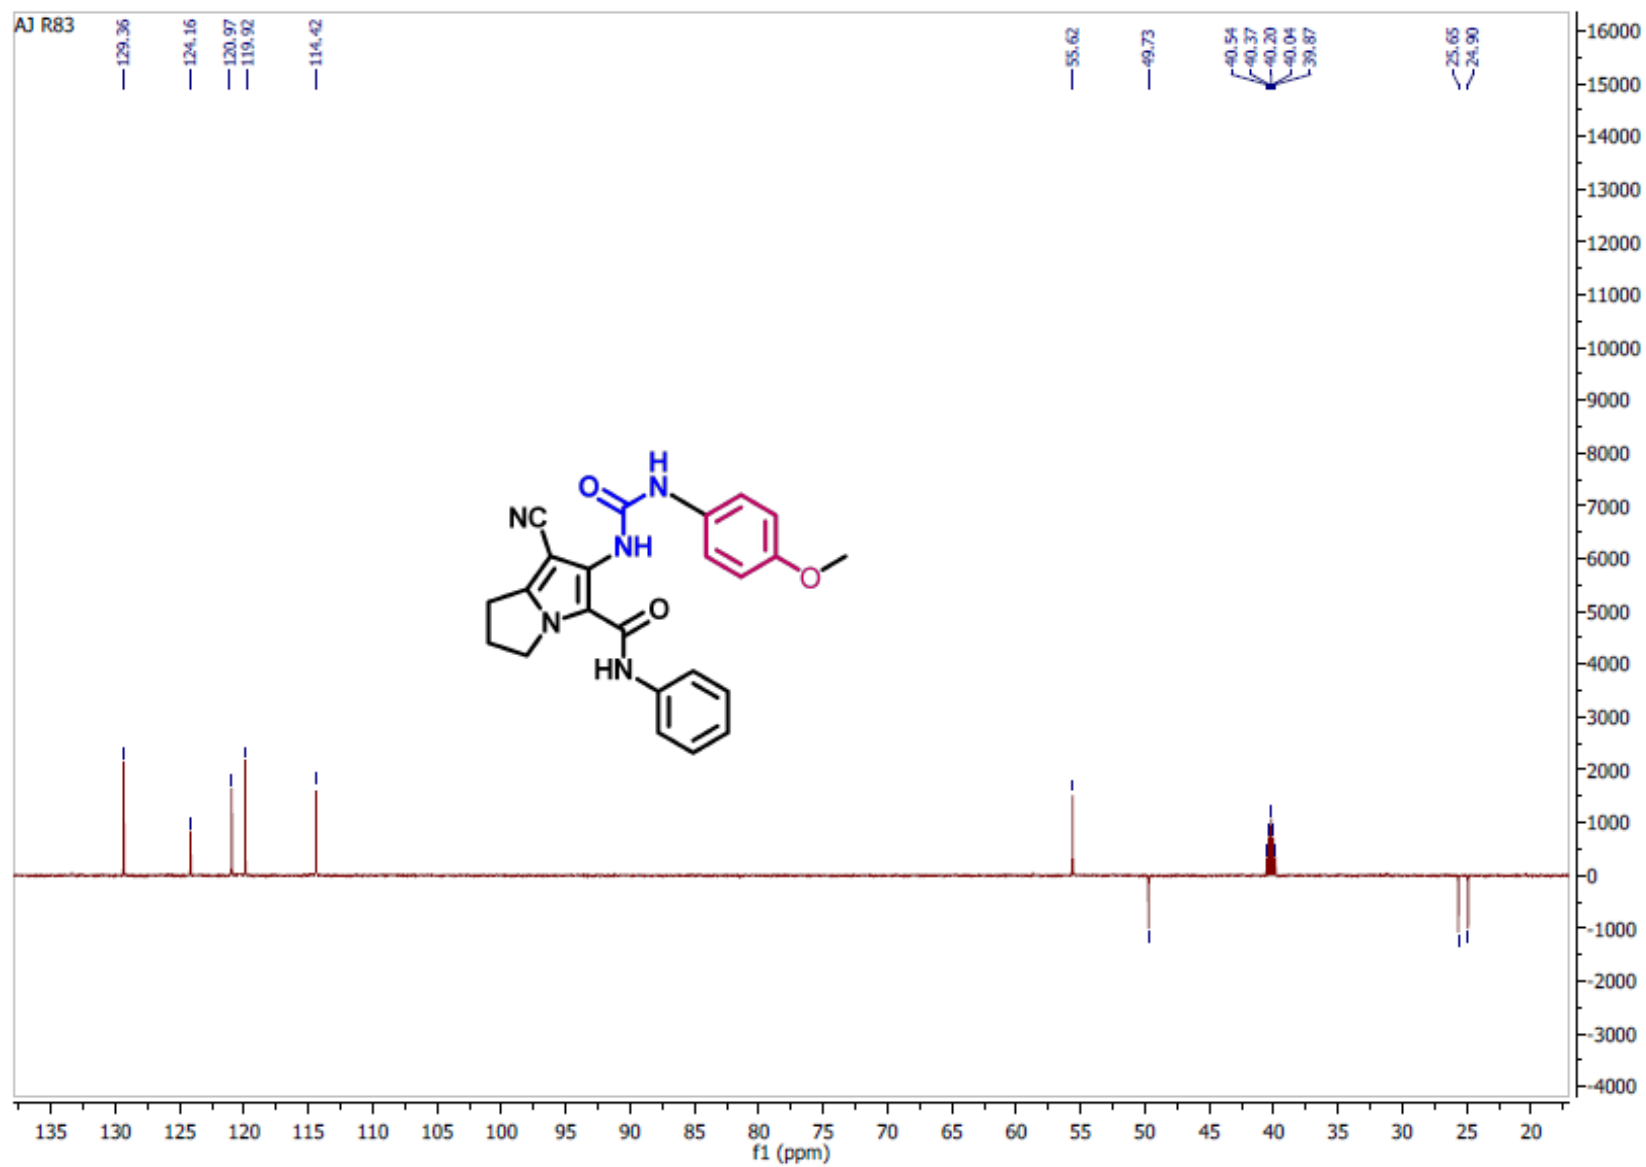

**Figure S87.**  $^1\text{H-NMR}$  (DMSO, 500 MHz,  $\delta$  ppm) spectrum of compound **17b**

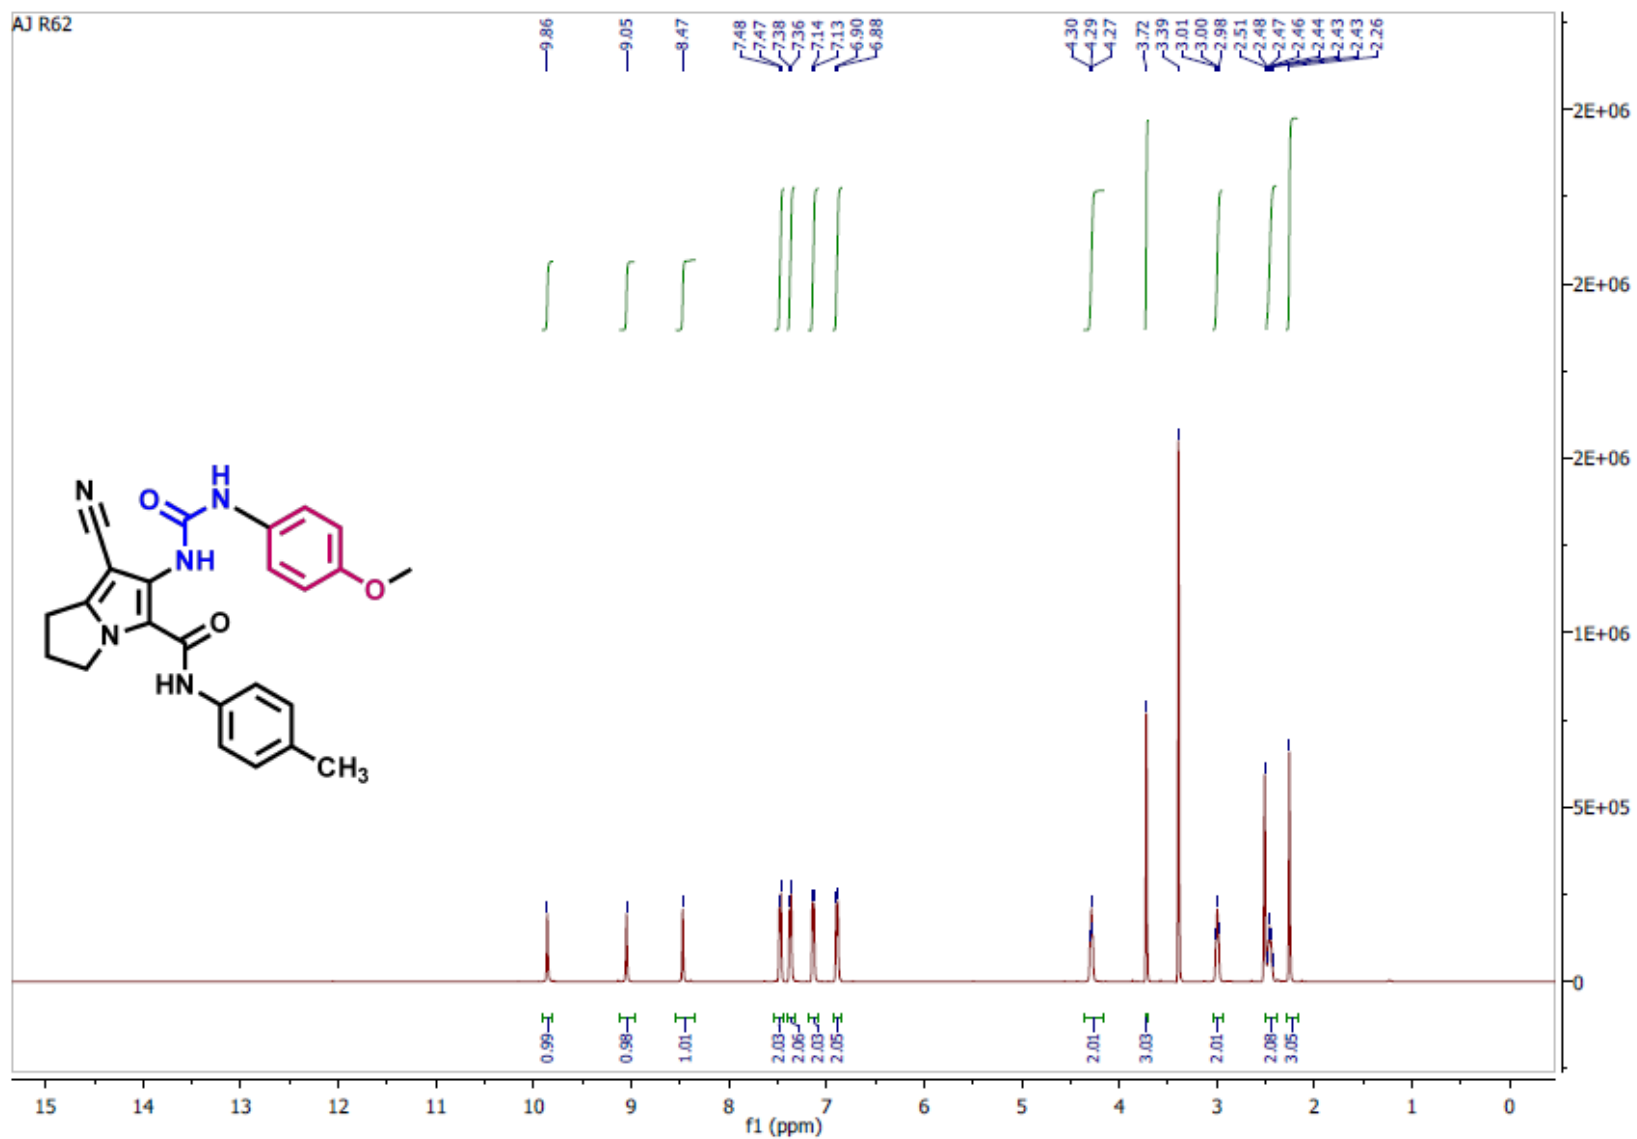

**Figure S88.**  $^1\text{H-NMR}$  (DMSO, 500 MHz,  $\delta$  ppm) spectrum of compound **17b** (zoom on aliphatic Hs).



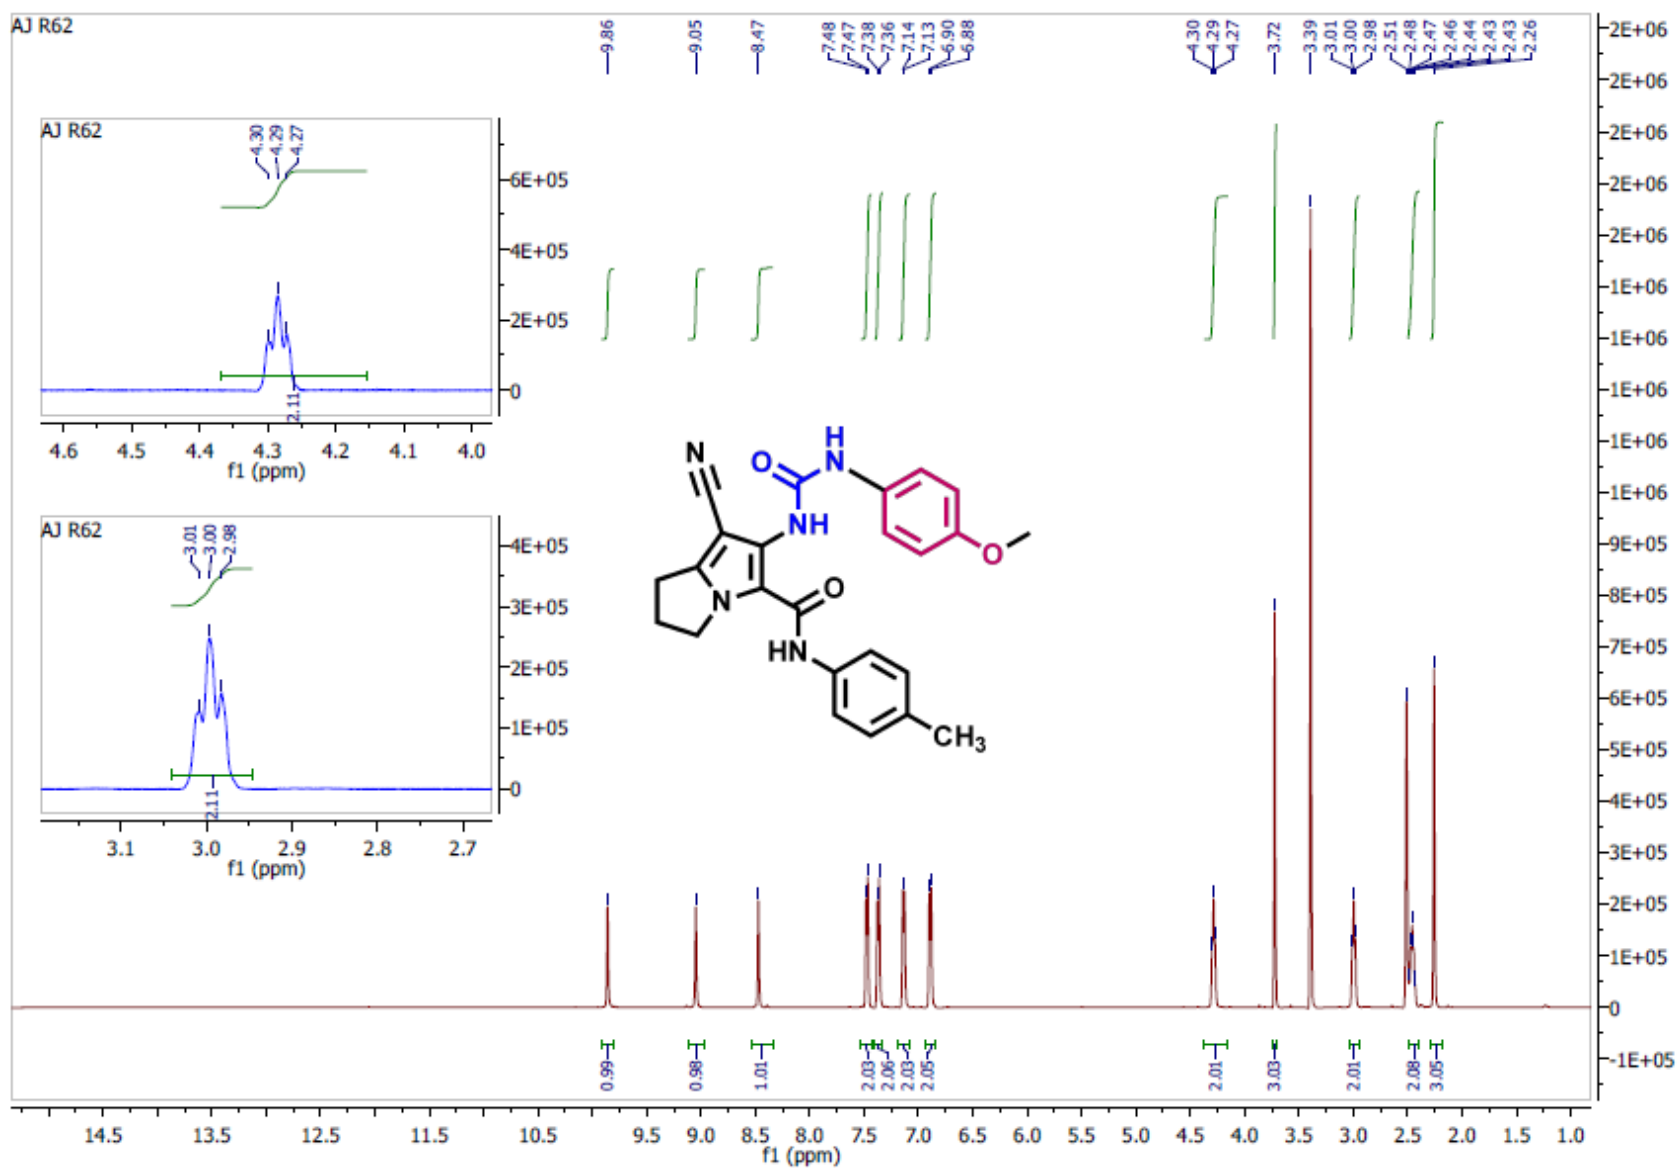

**Figure S89.**  $^1\text{H-NMR}$  (DMSO, 500 MHz,  $\delta$  ppm) spectrum of compound **17b** (zoom on aliphatic/aromatic Hs).

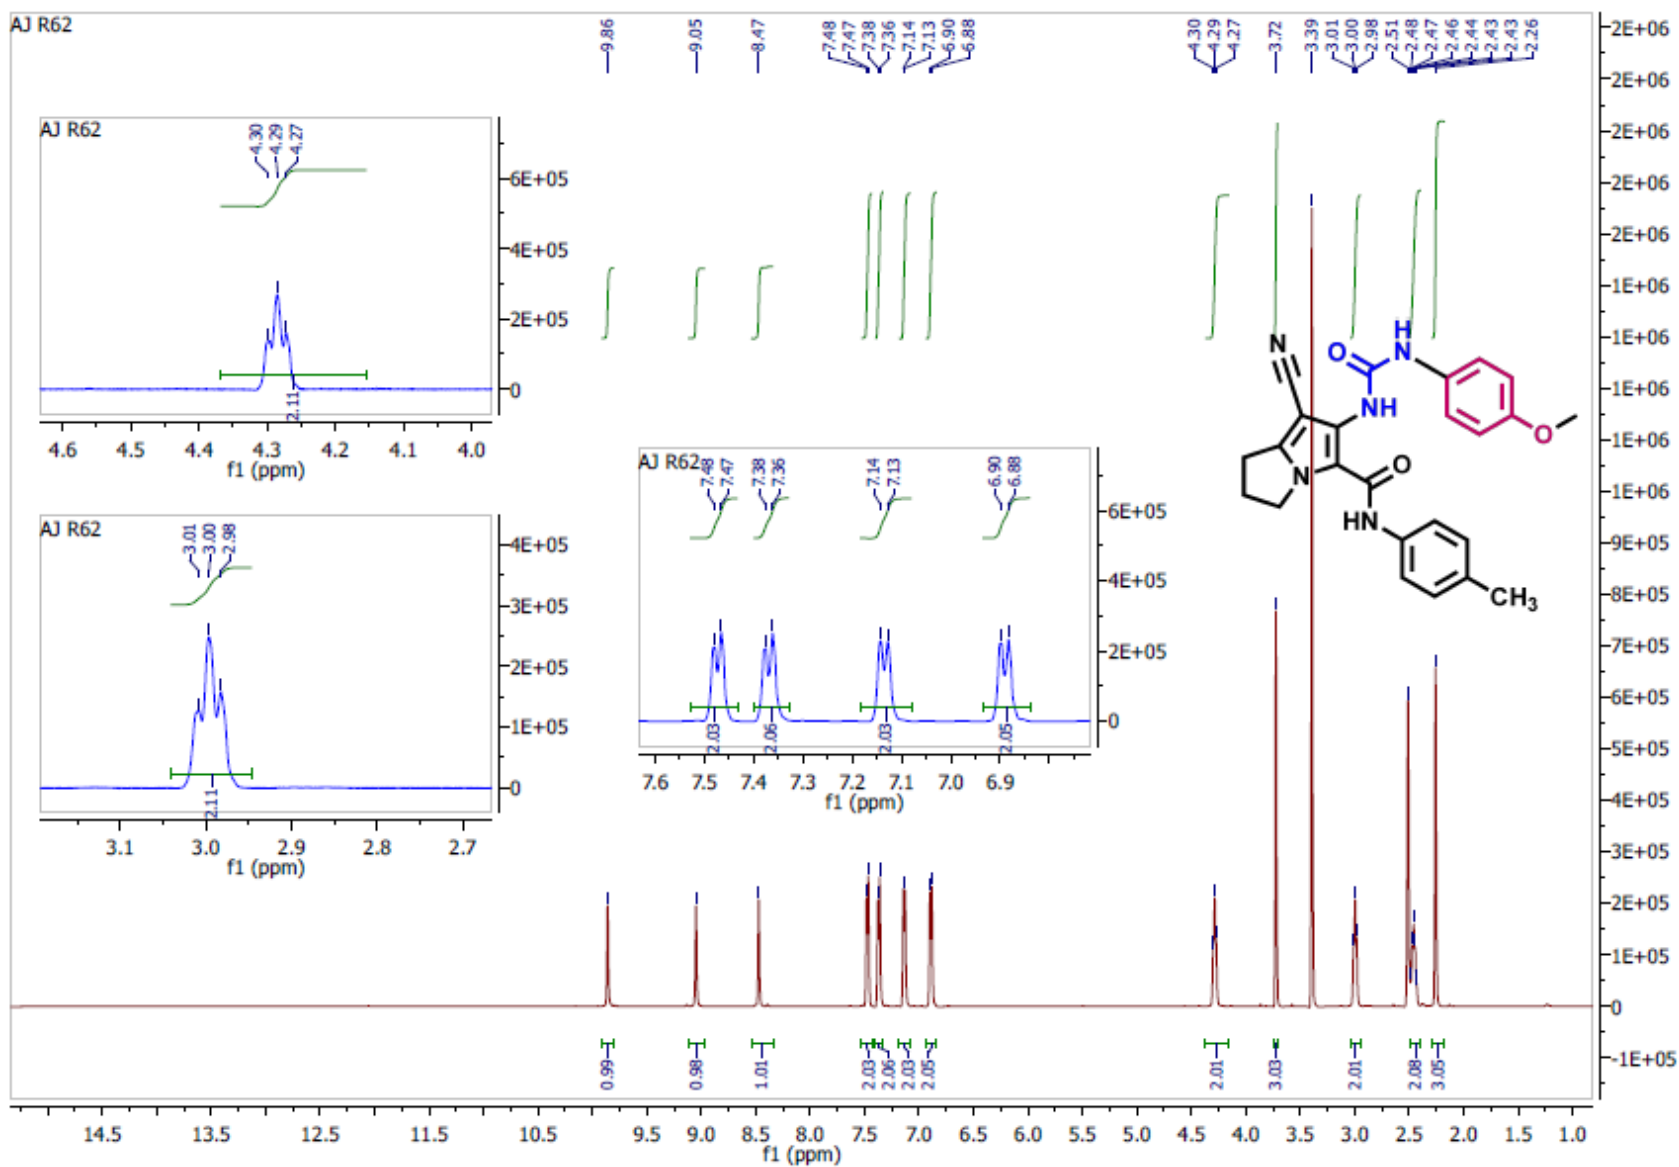

**Figure S90.**  $^{13}\text{C}$ -NMR (DMSO, 125 MHz,  $\delta$  ppm) spectrum of compound **17b**.

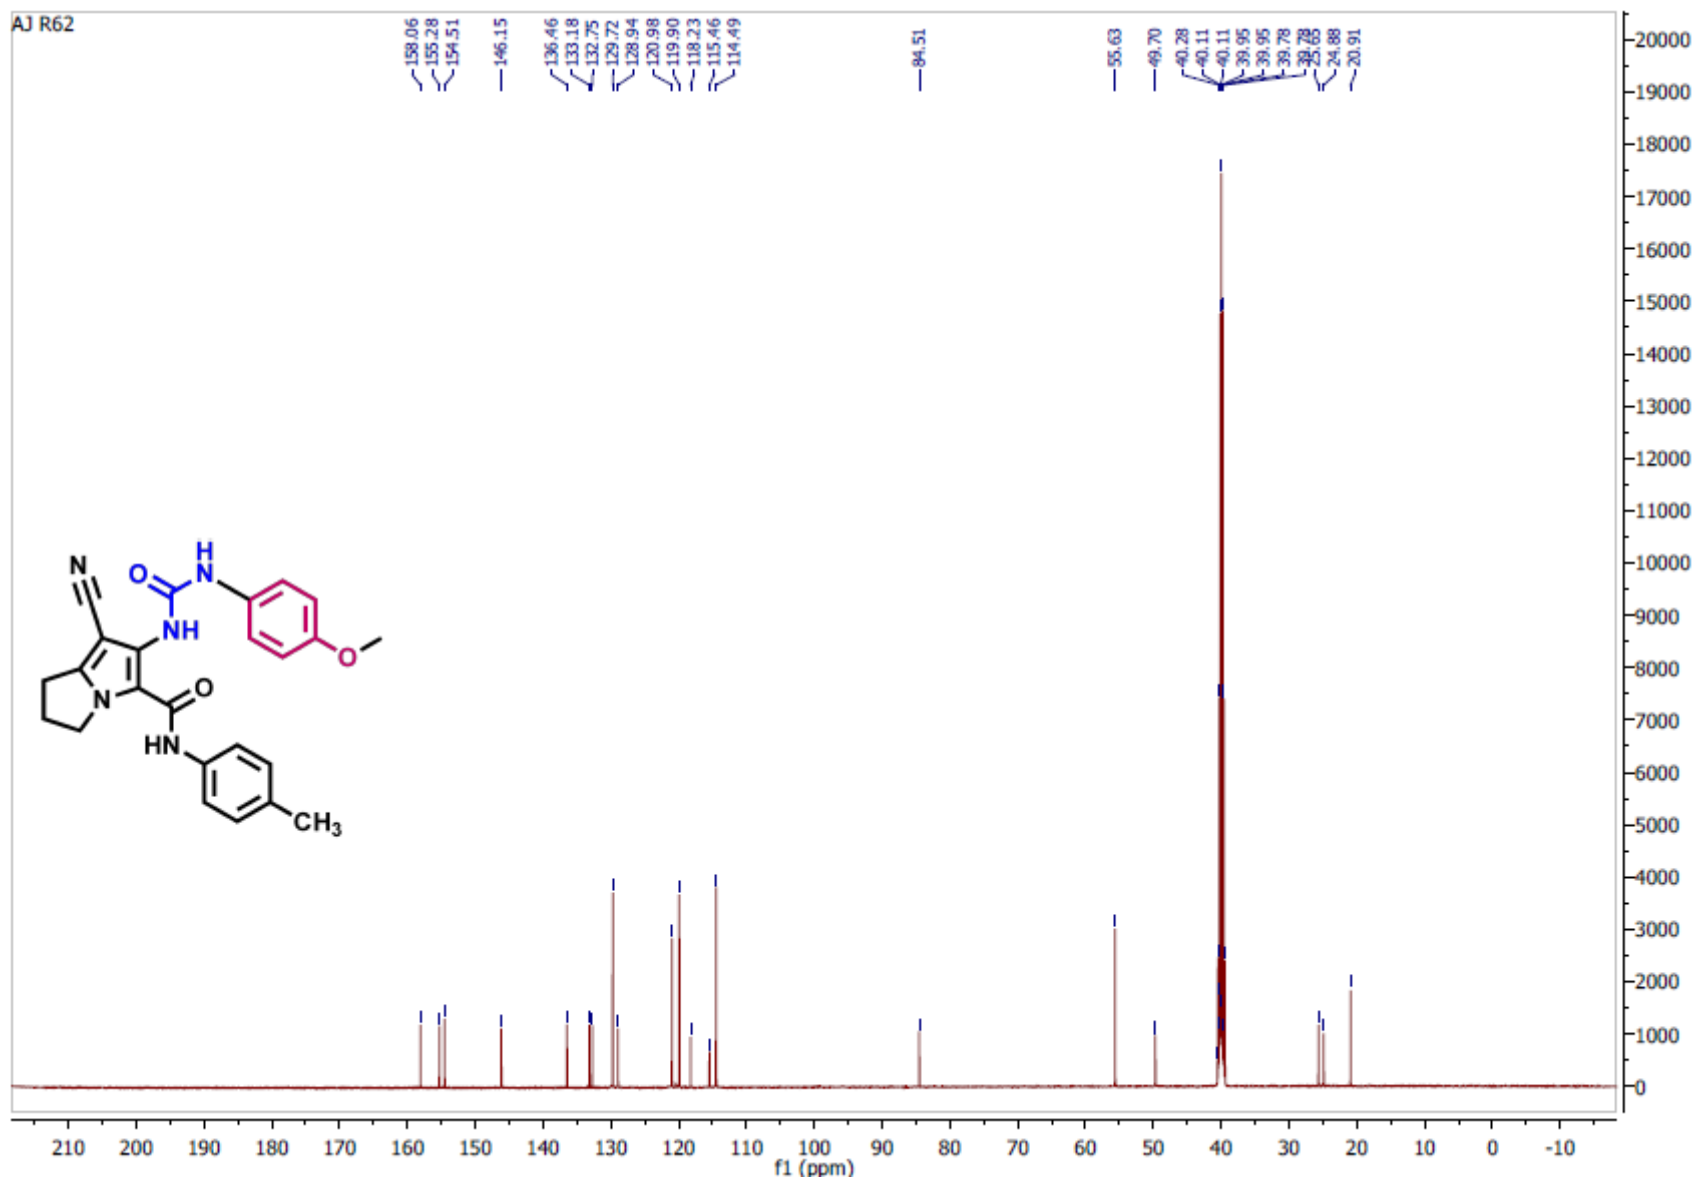

**Figure S91.** DEPT C<sup>135</sup> (DMSO, 125 MHz,  $\delta$  ppm) of compound **17b**.

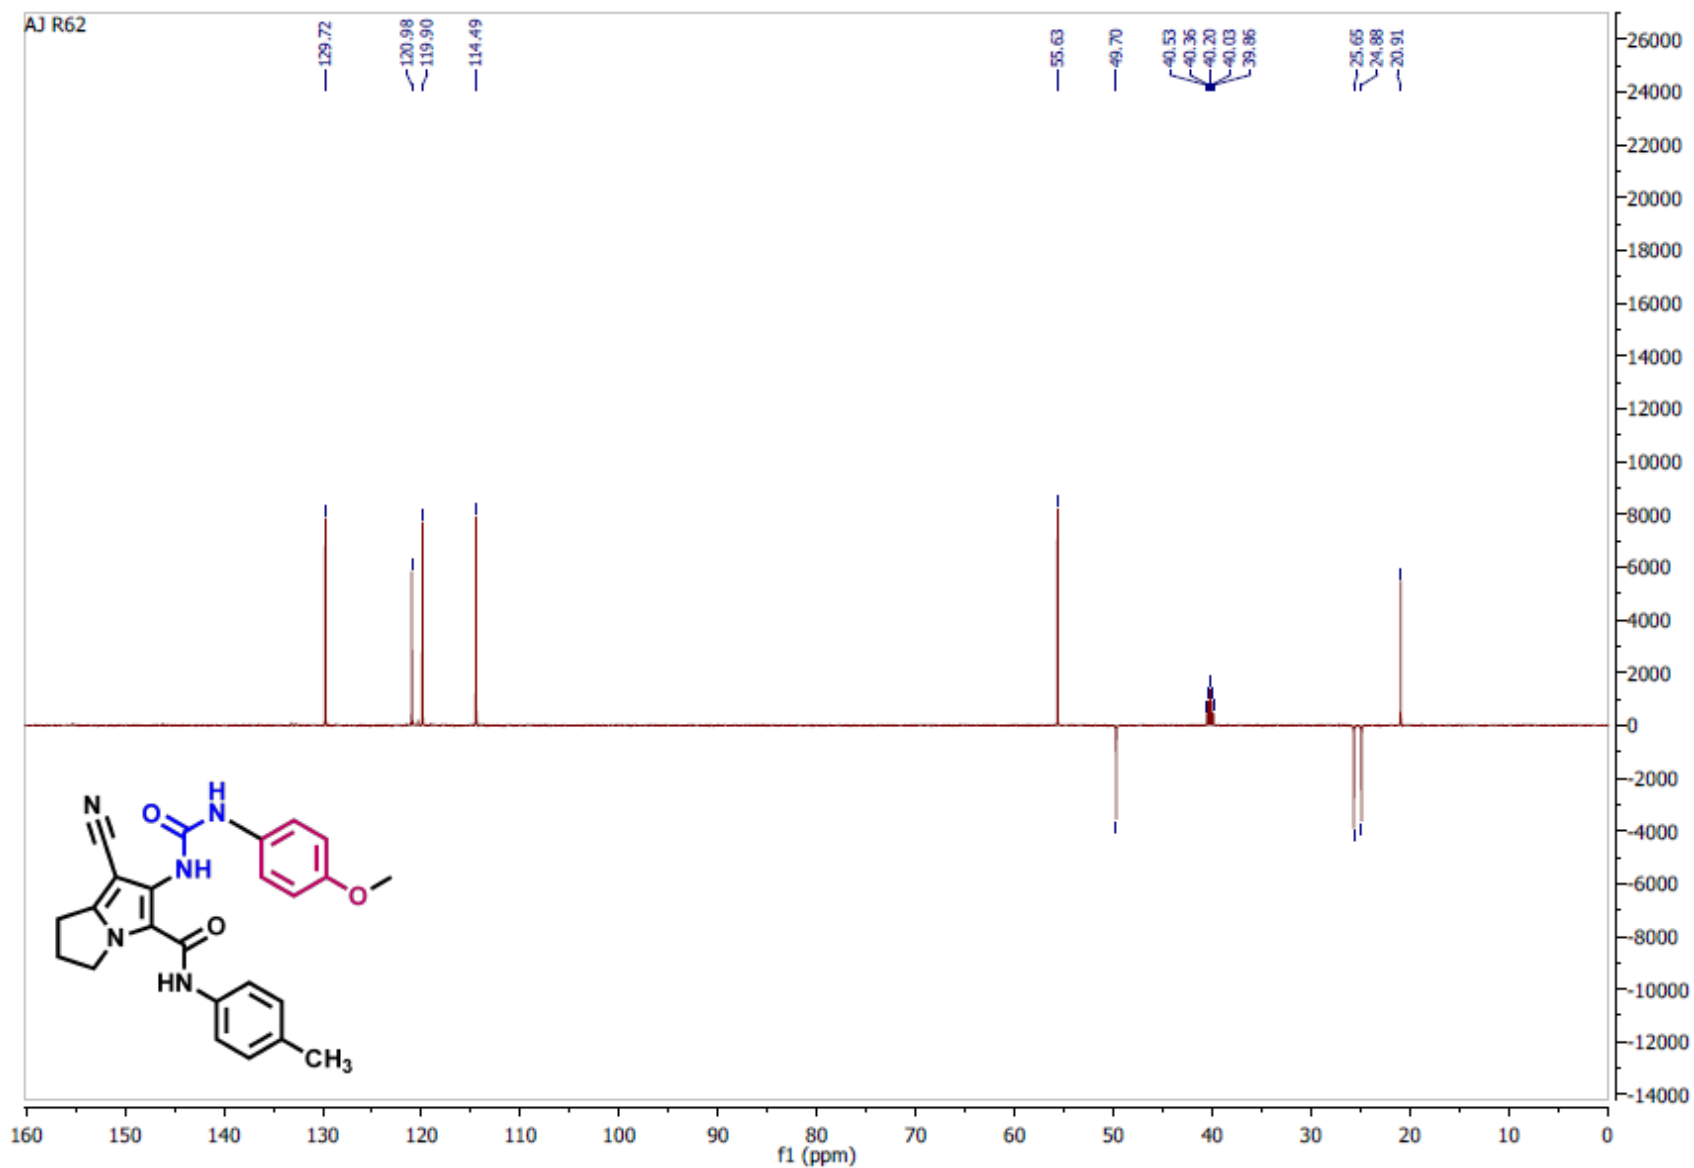

**Figure S92.**  $^1\text{H-NMR}$  (DMSO, 500 MHz,  $\delta$  ppm) spectrum of compound **18a**

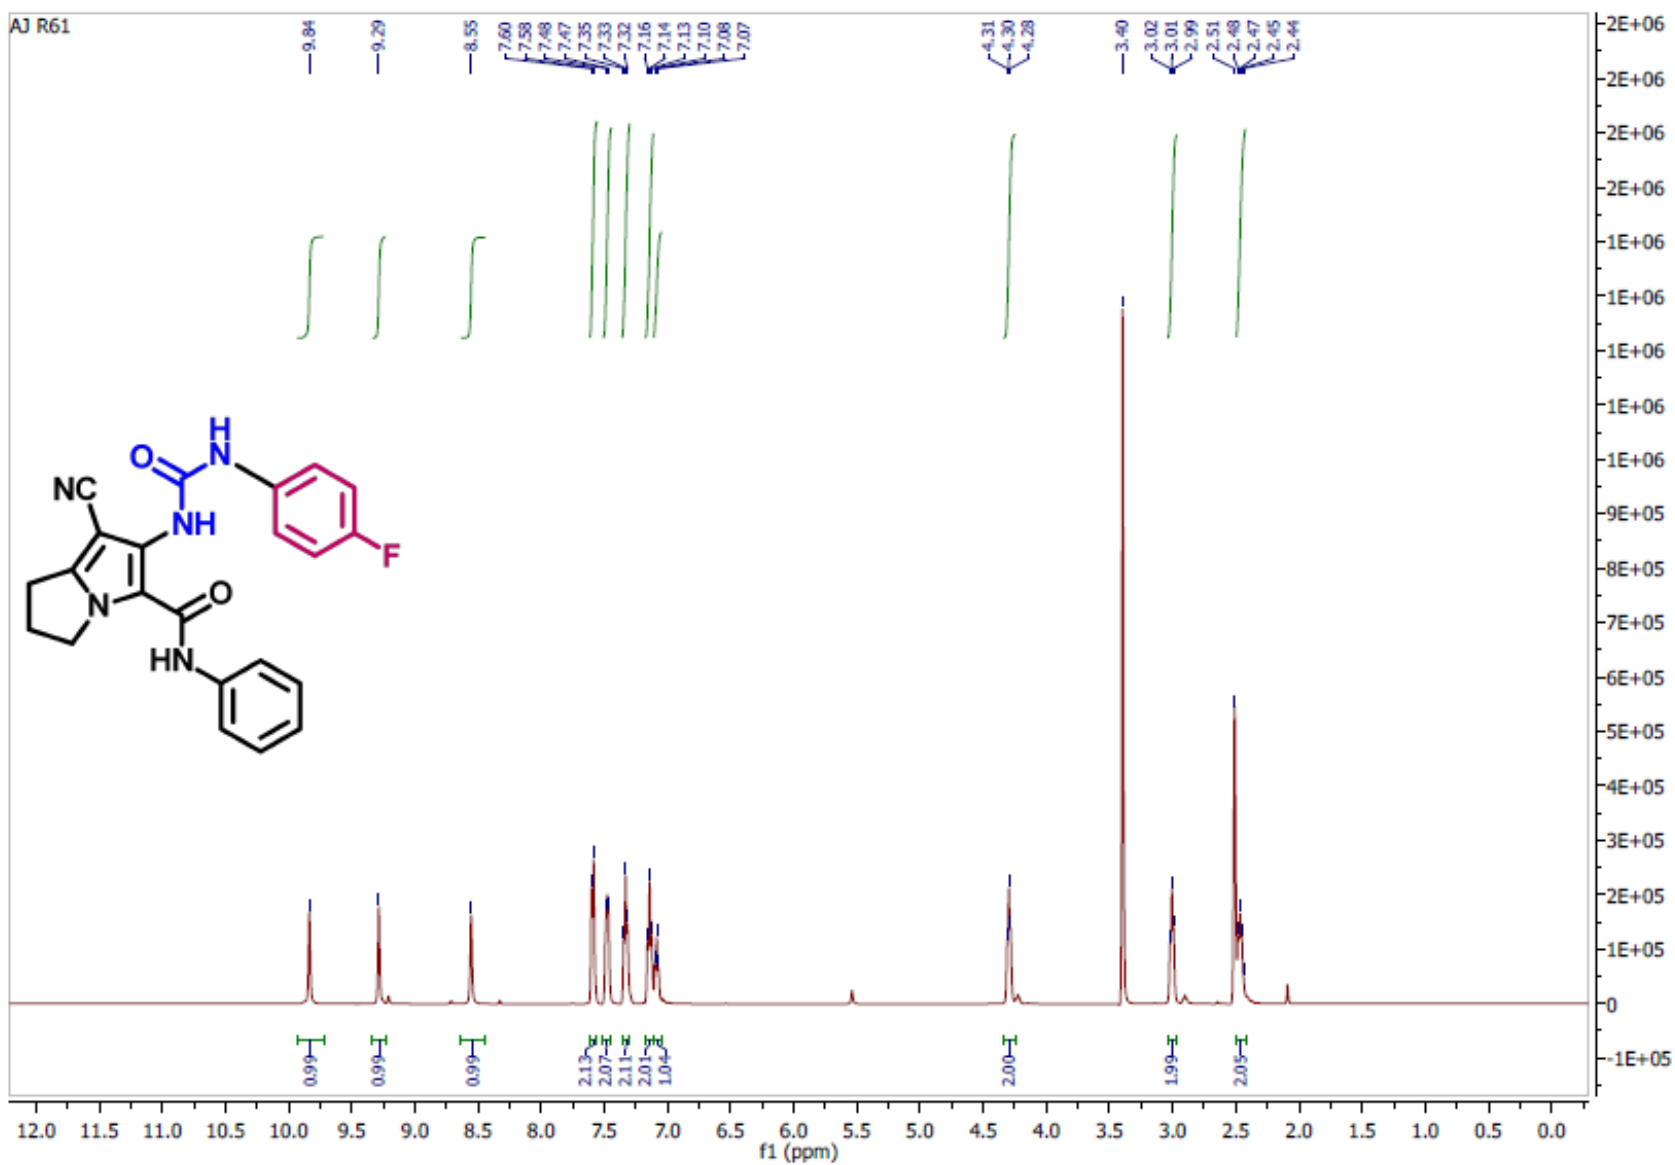

**Figure S93.** <sup>1</sup>H-NMR (DMSO, 500 MHz,  $\delta$  ppm) spectrum of compound **18a** (ZOOM on aliphatic Hs)

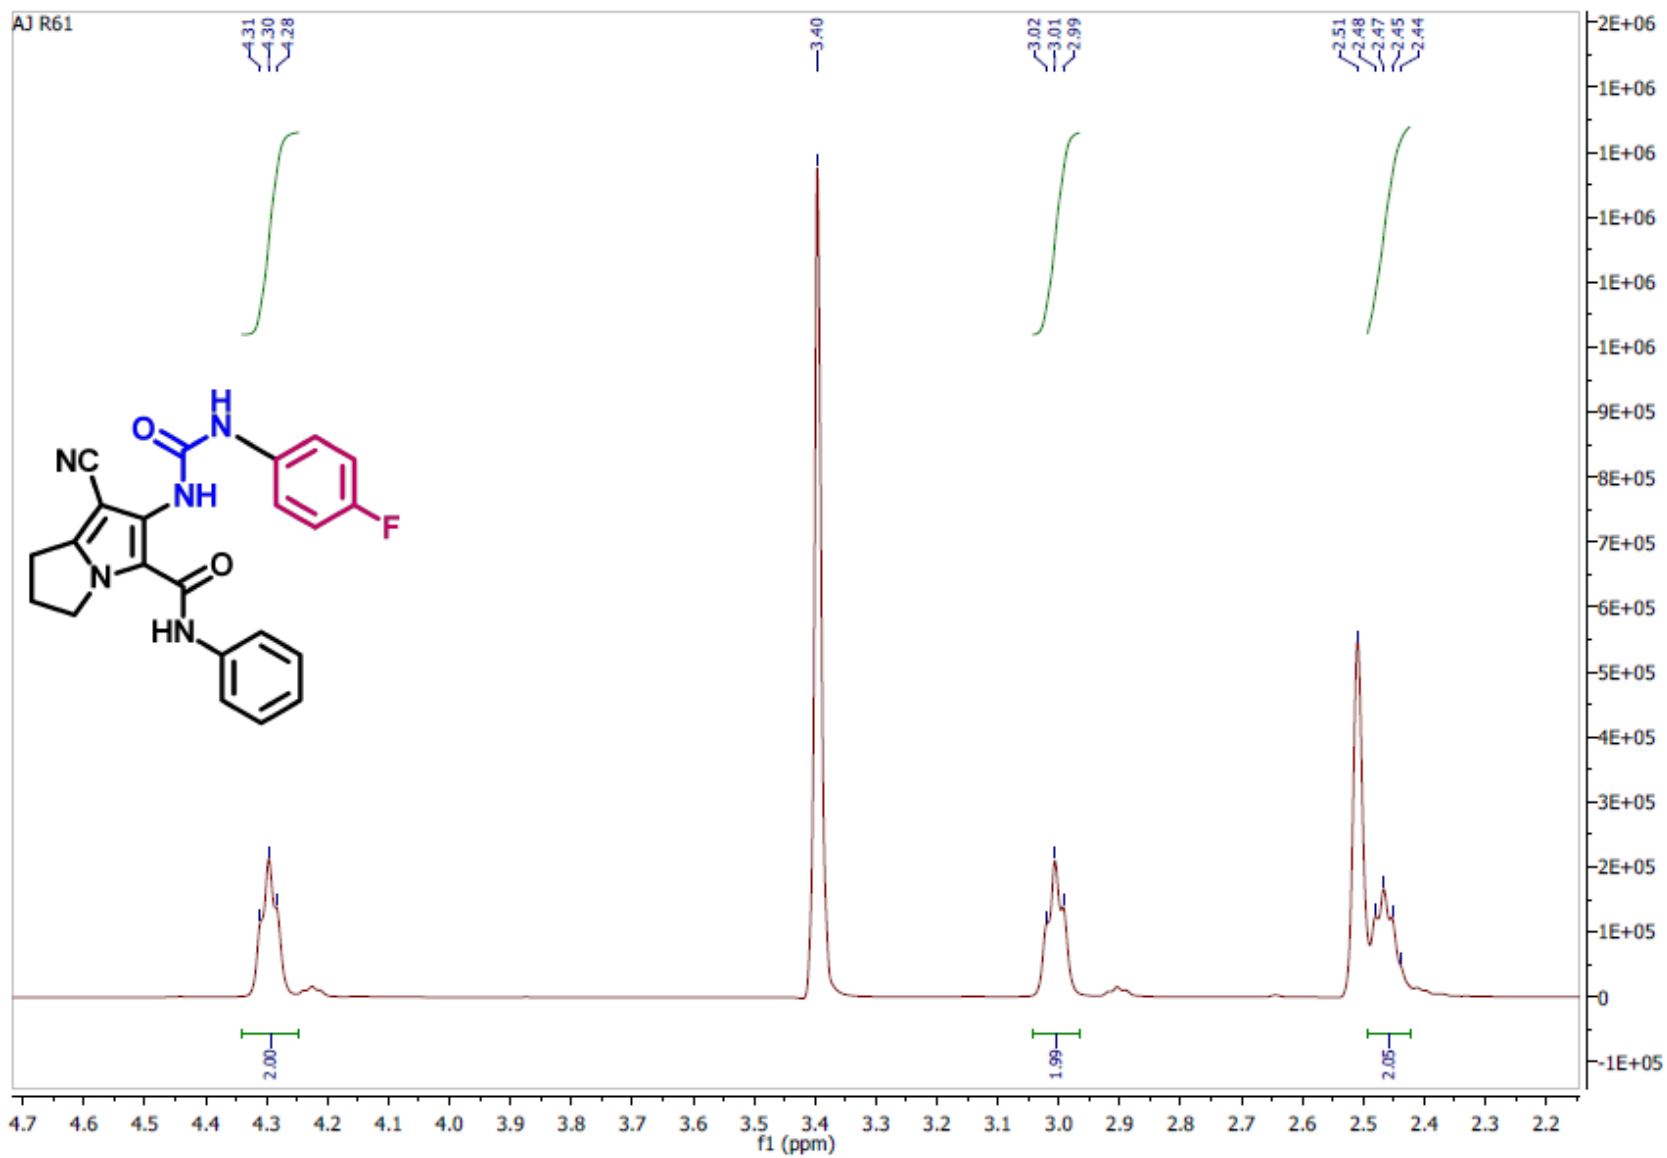

**Figure S94.**  $^1\text{H-NMR}$  (DMSO, 500 MHz,  $\delta$  ppm) spectrum of compound **18a** (**ZOOM on NHs & aromatic Hs**)

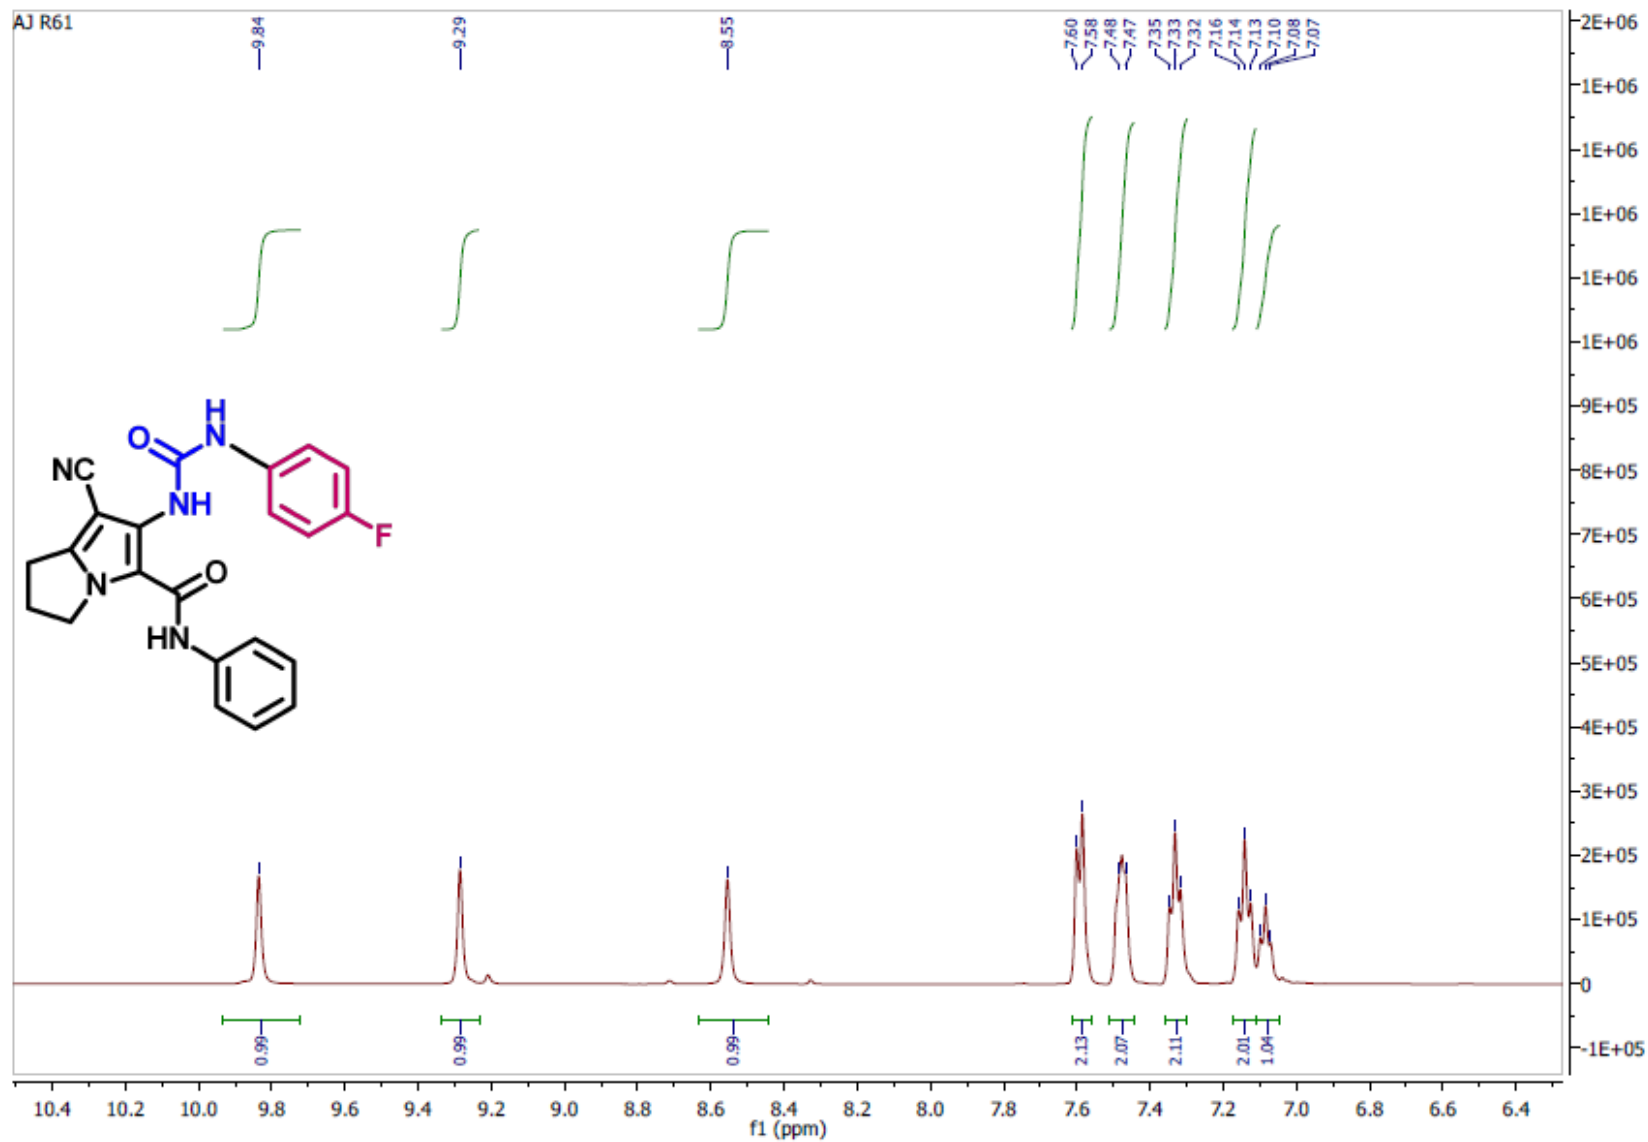

Figure S95.  $^1\text{H-NMR}$  (DMSO, 500 MHz,  $\delta$  ppm) spectrum of compound **16a** (ZOOM on aromatic Hs)

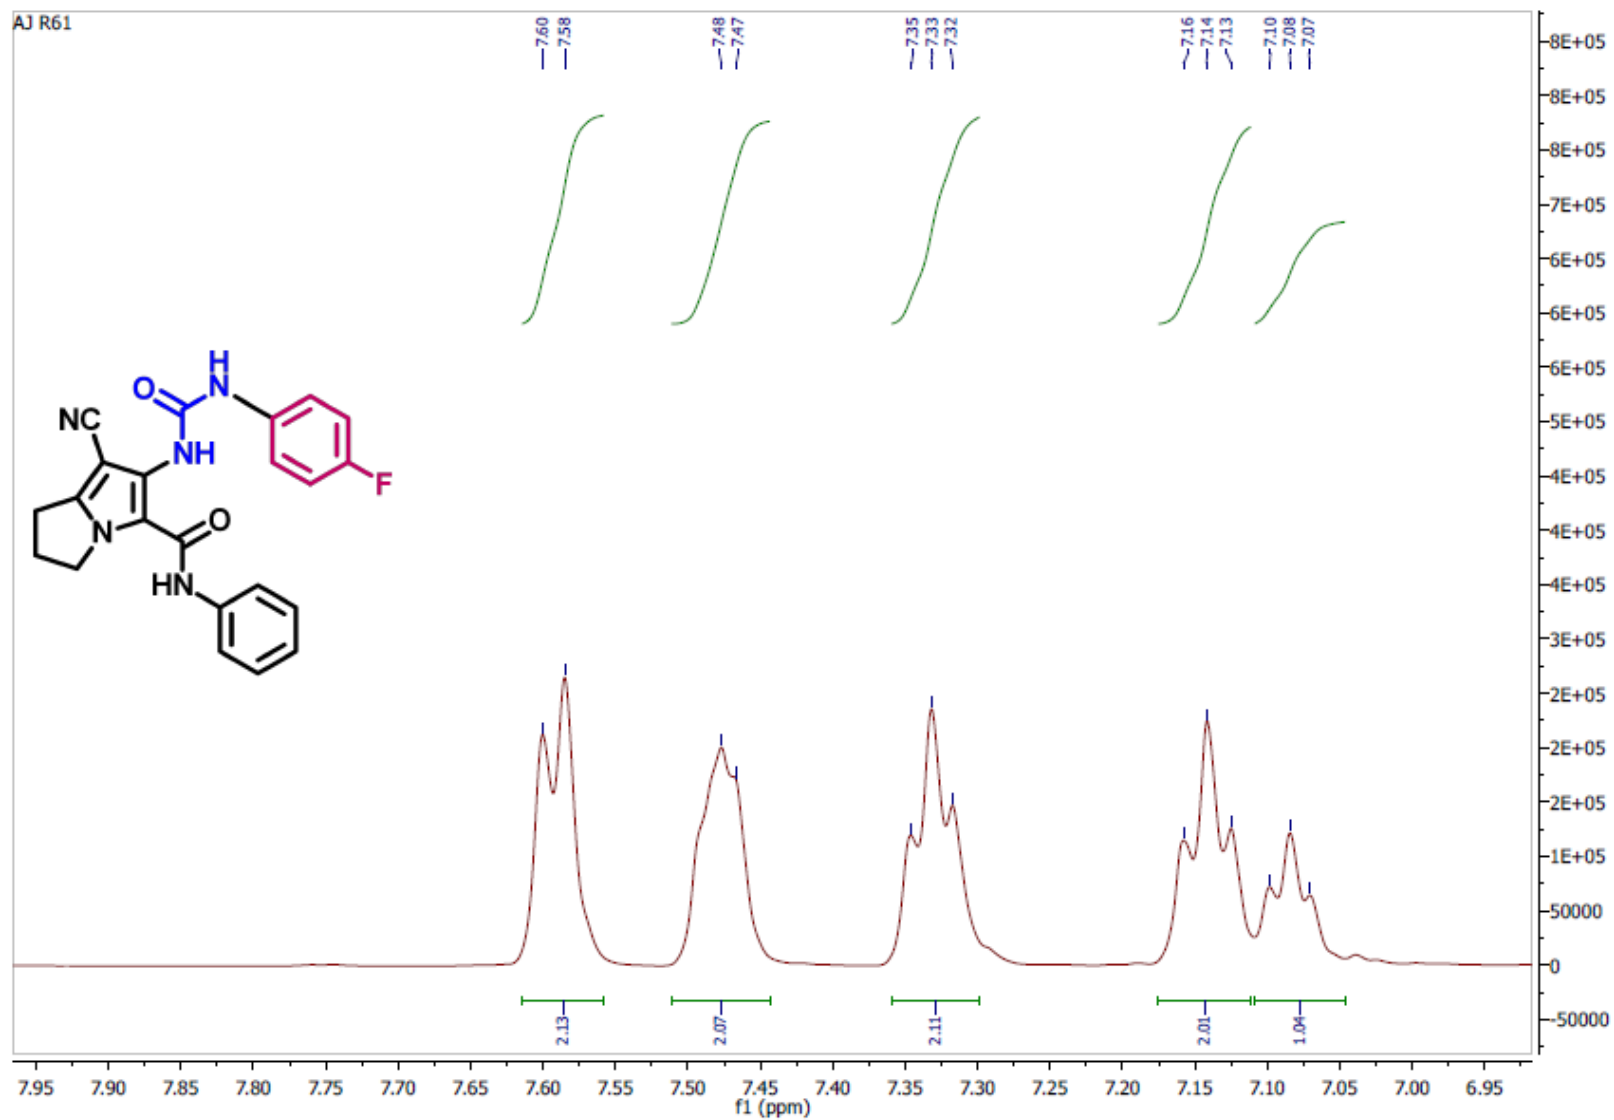



**Figure S96.**  $^{13}\text{C}$ -NMR (DMSO, 125 MHz,  $\delta$  ppm) spectrum of compound **18a**

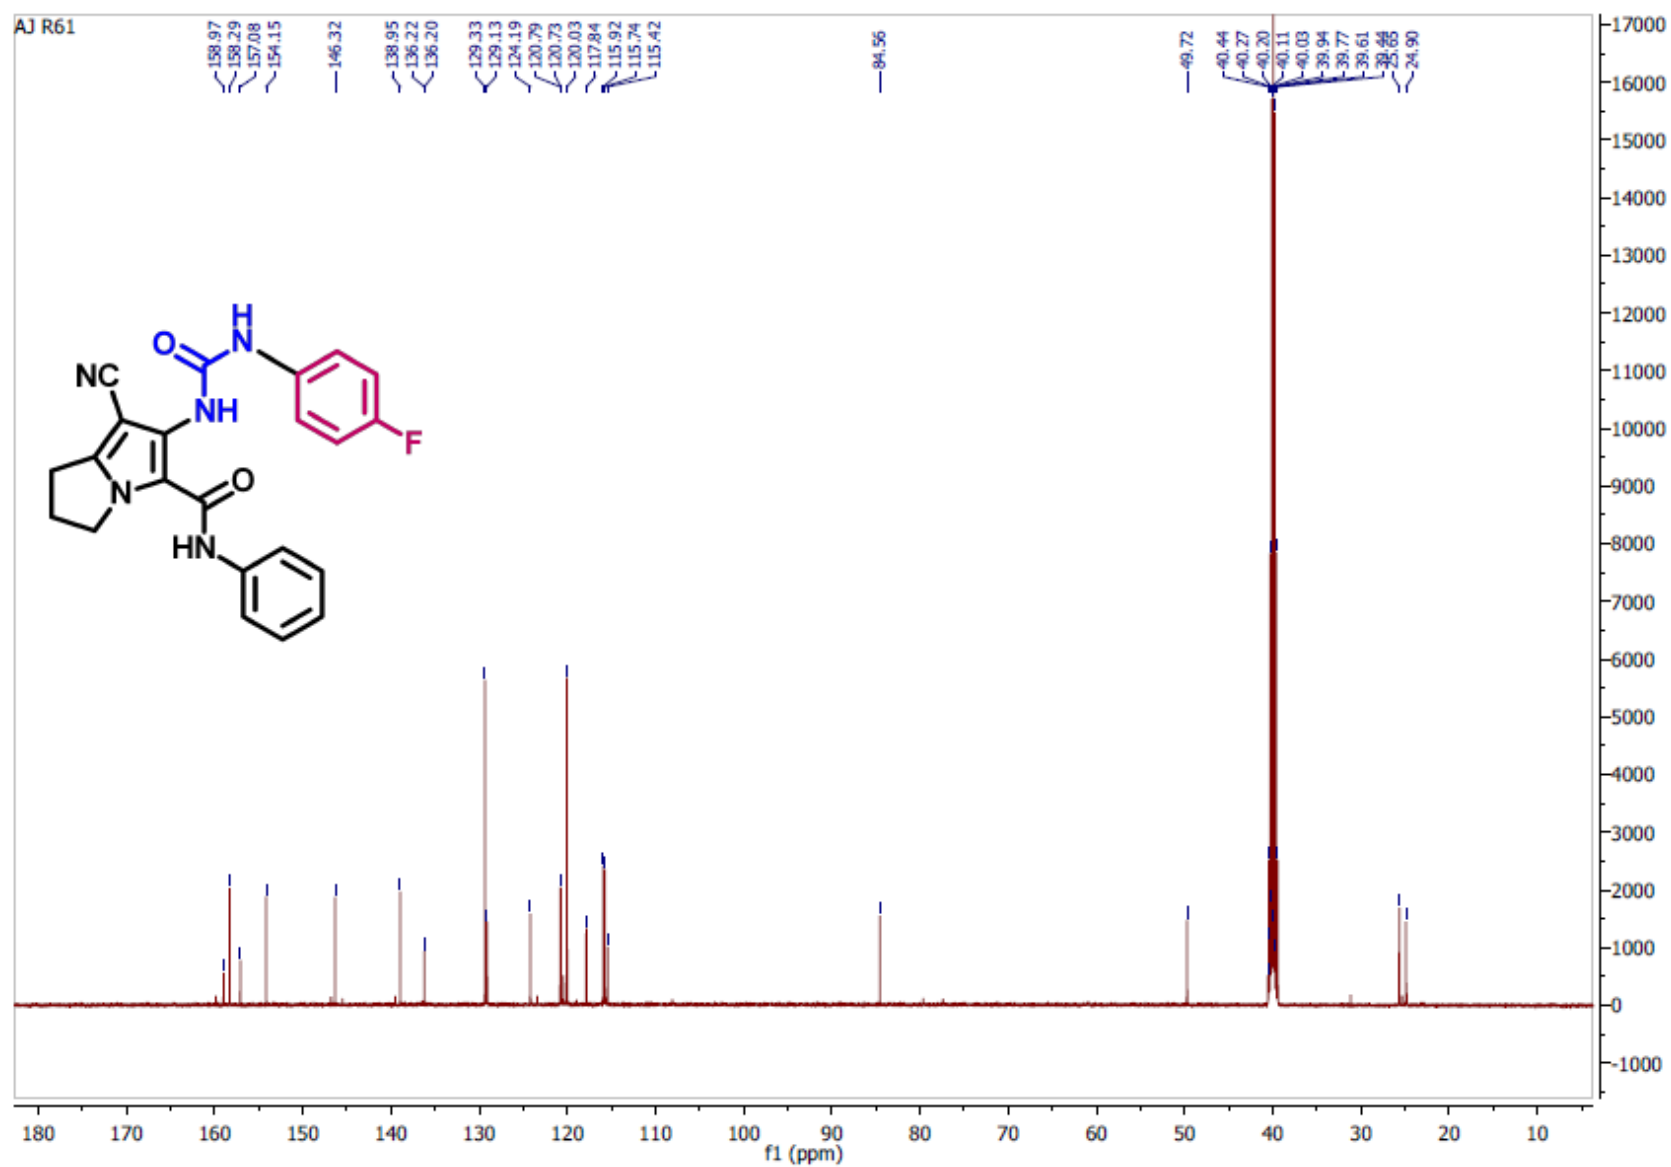

Figure S97.  $^{13}\text{C}$ -NMR (DMSO, 125 MHz,  $\delta$  ppm) spectrum of compound **18a** (ZOOM on aliphatic Cs)

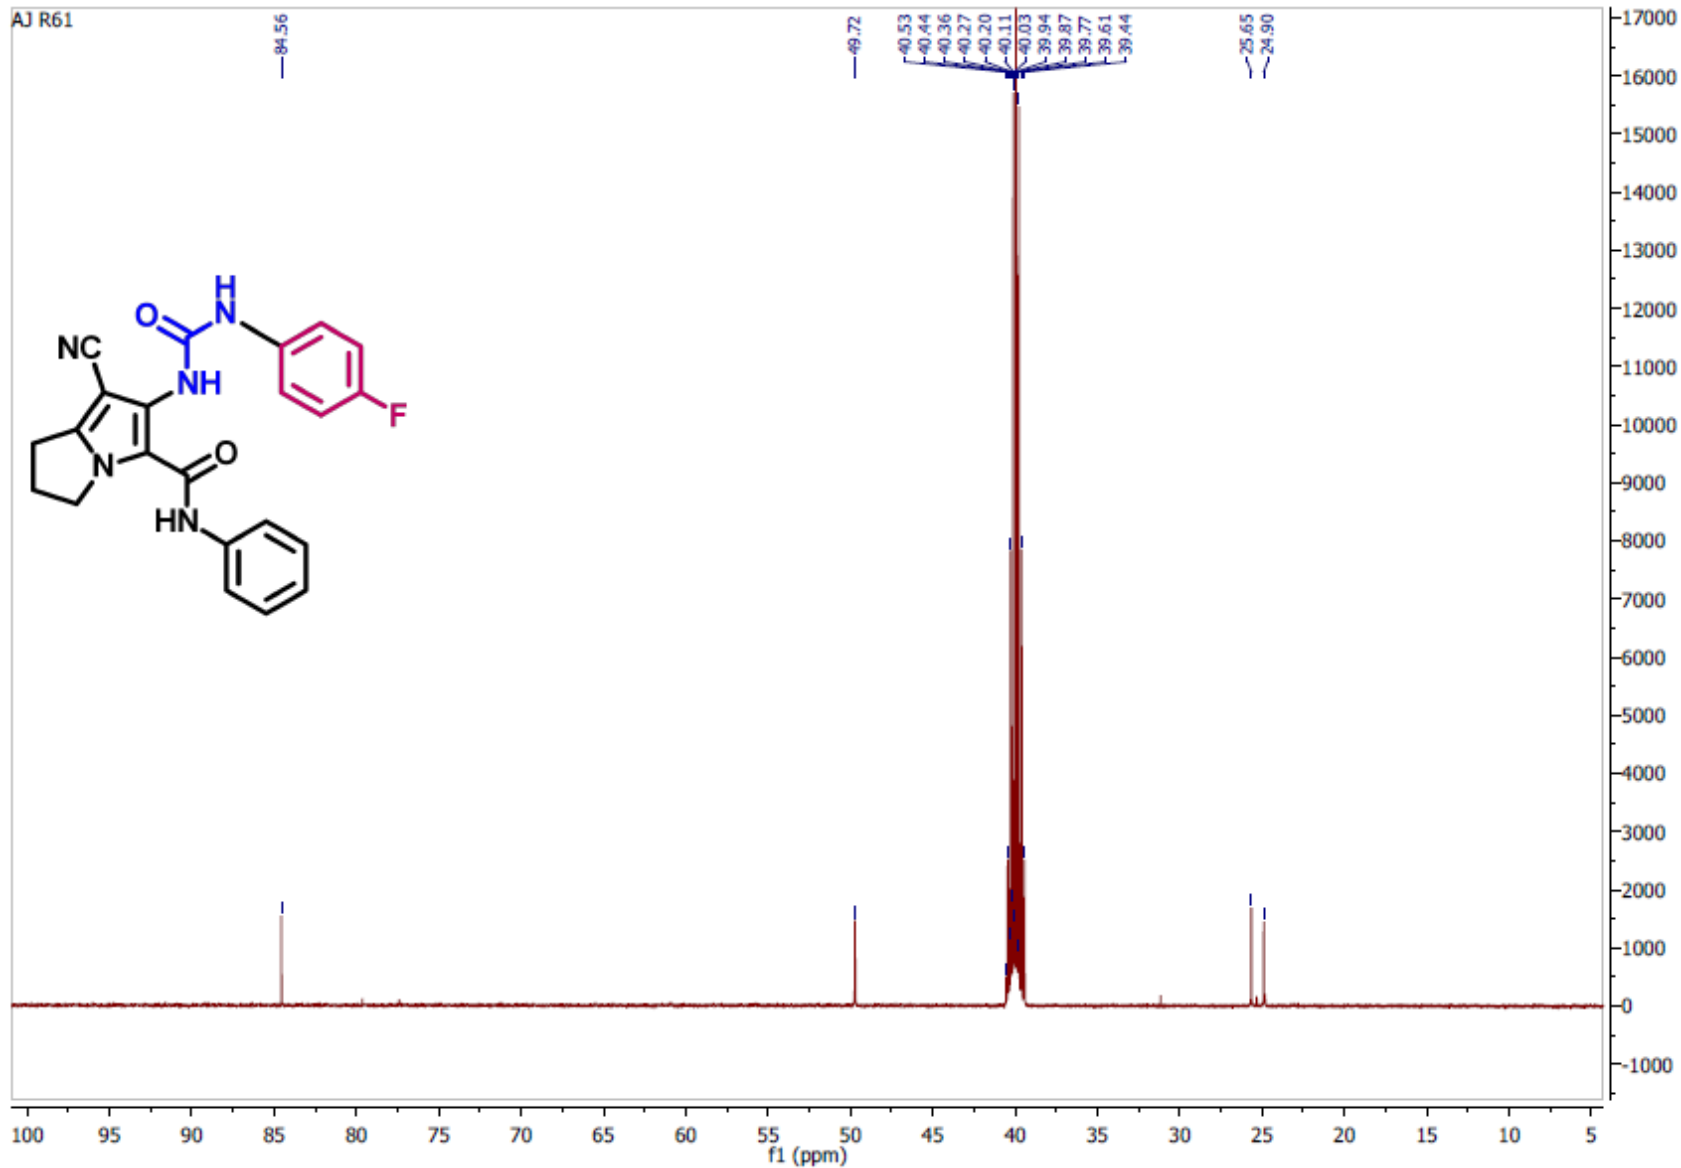

**Figure S98.**  $^{13}\text{C}$ -NMR (DMSO, 125 MHz,  $\delta$  ppm) spectrum of compound **18a** (**ZOOM on aromatic Cs**)

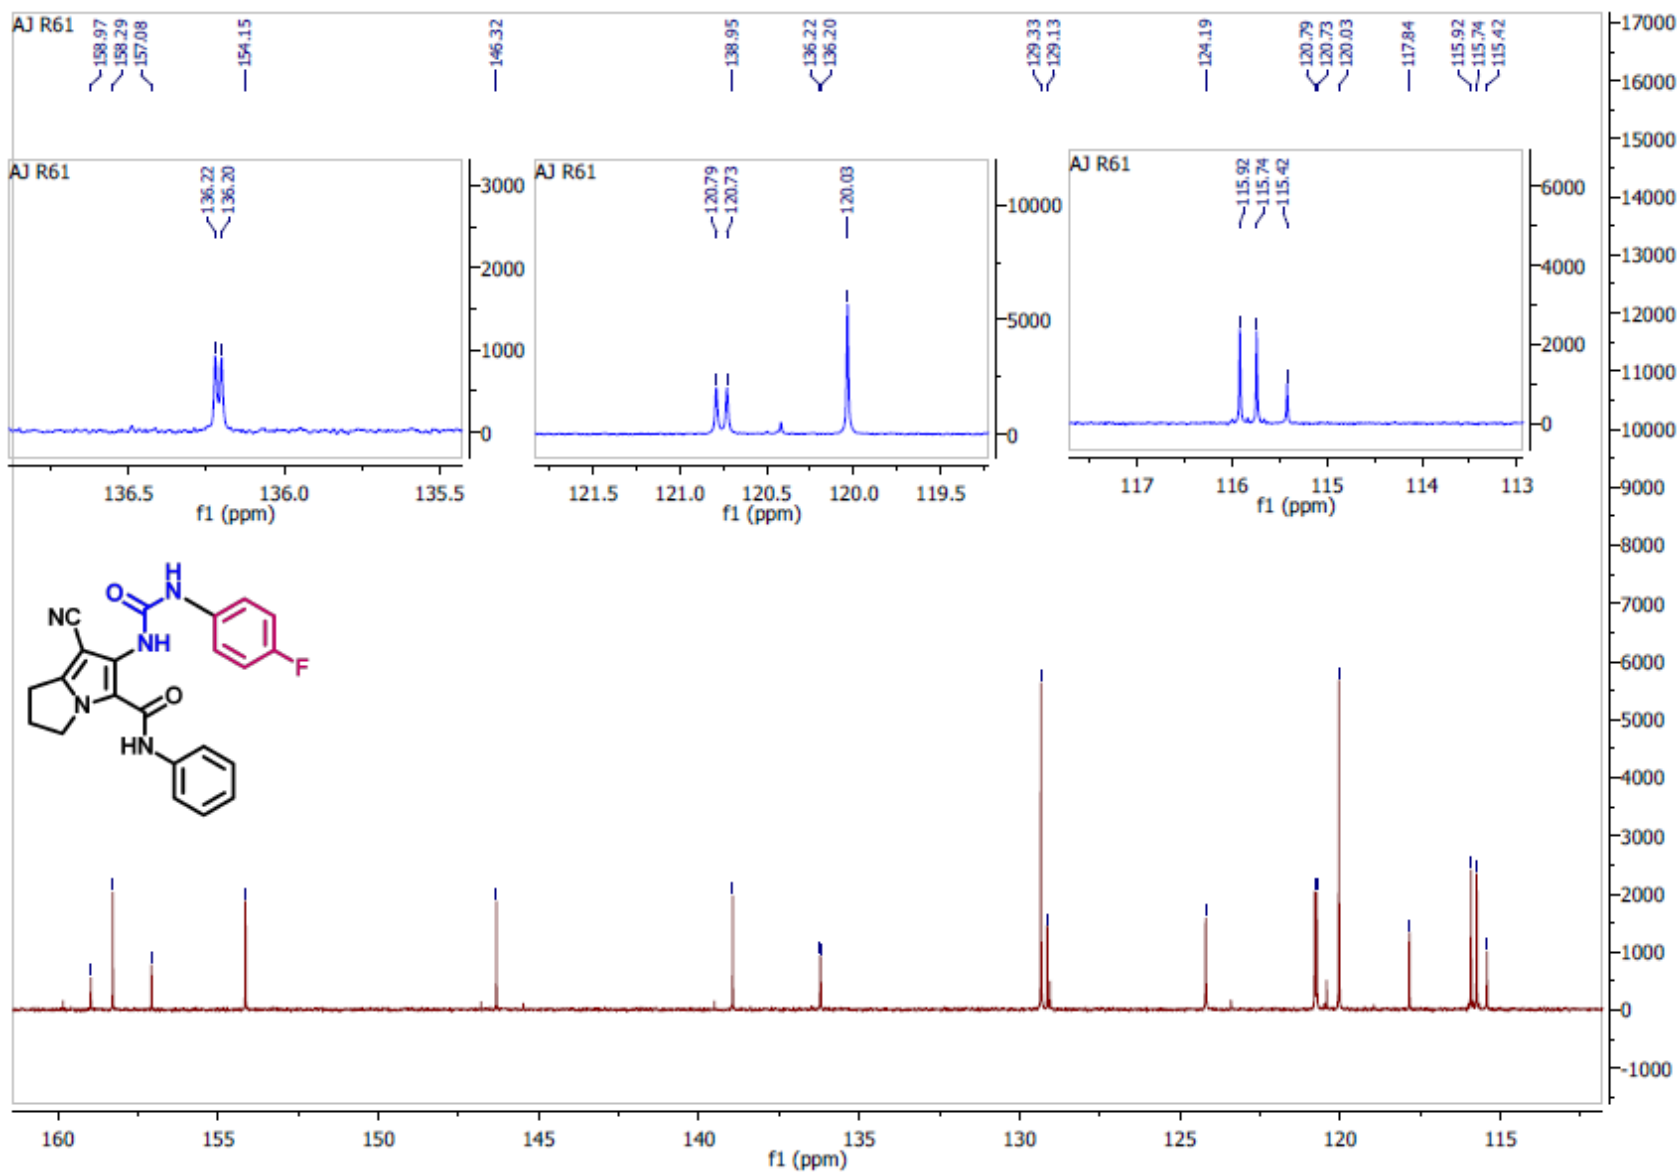

Figure S99. DEPT C<sup>135</sup> (DMSO, 125 MHz,  $\delta$  ppm) of compound **18a**.

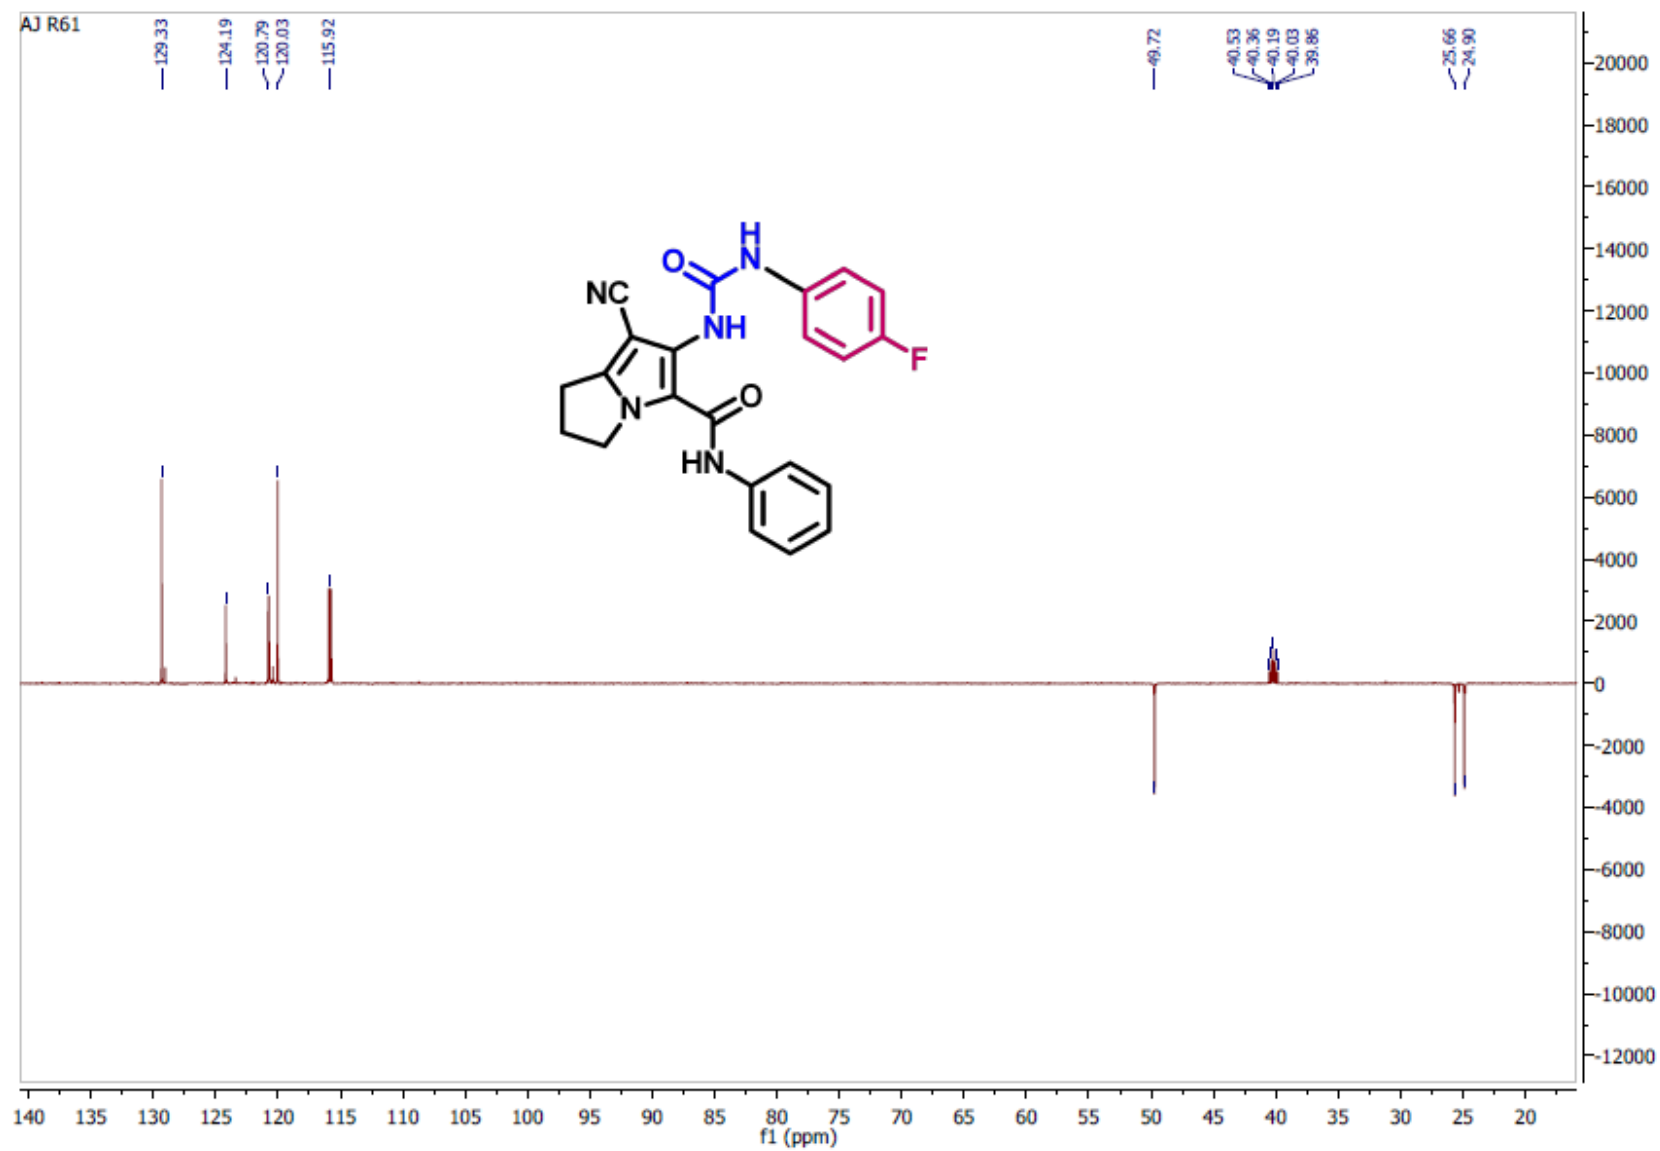

**Figure S100.** DEPT  $C^{135}$  spectrum of compound **18a** (zoom, aliphatic  $CH_2$  groups)

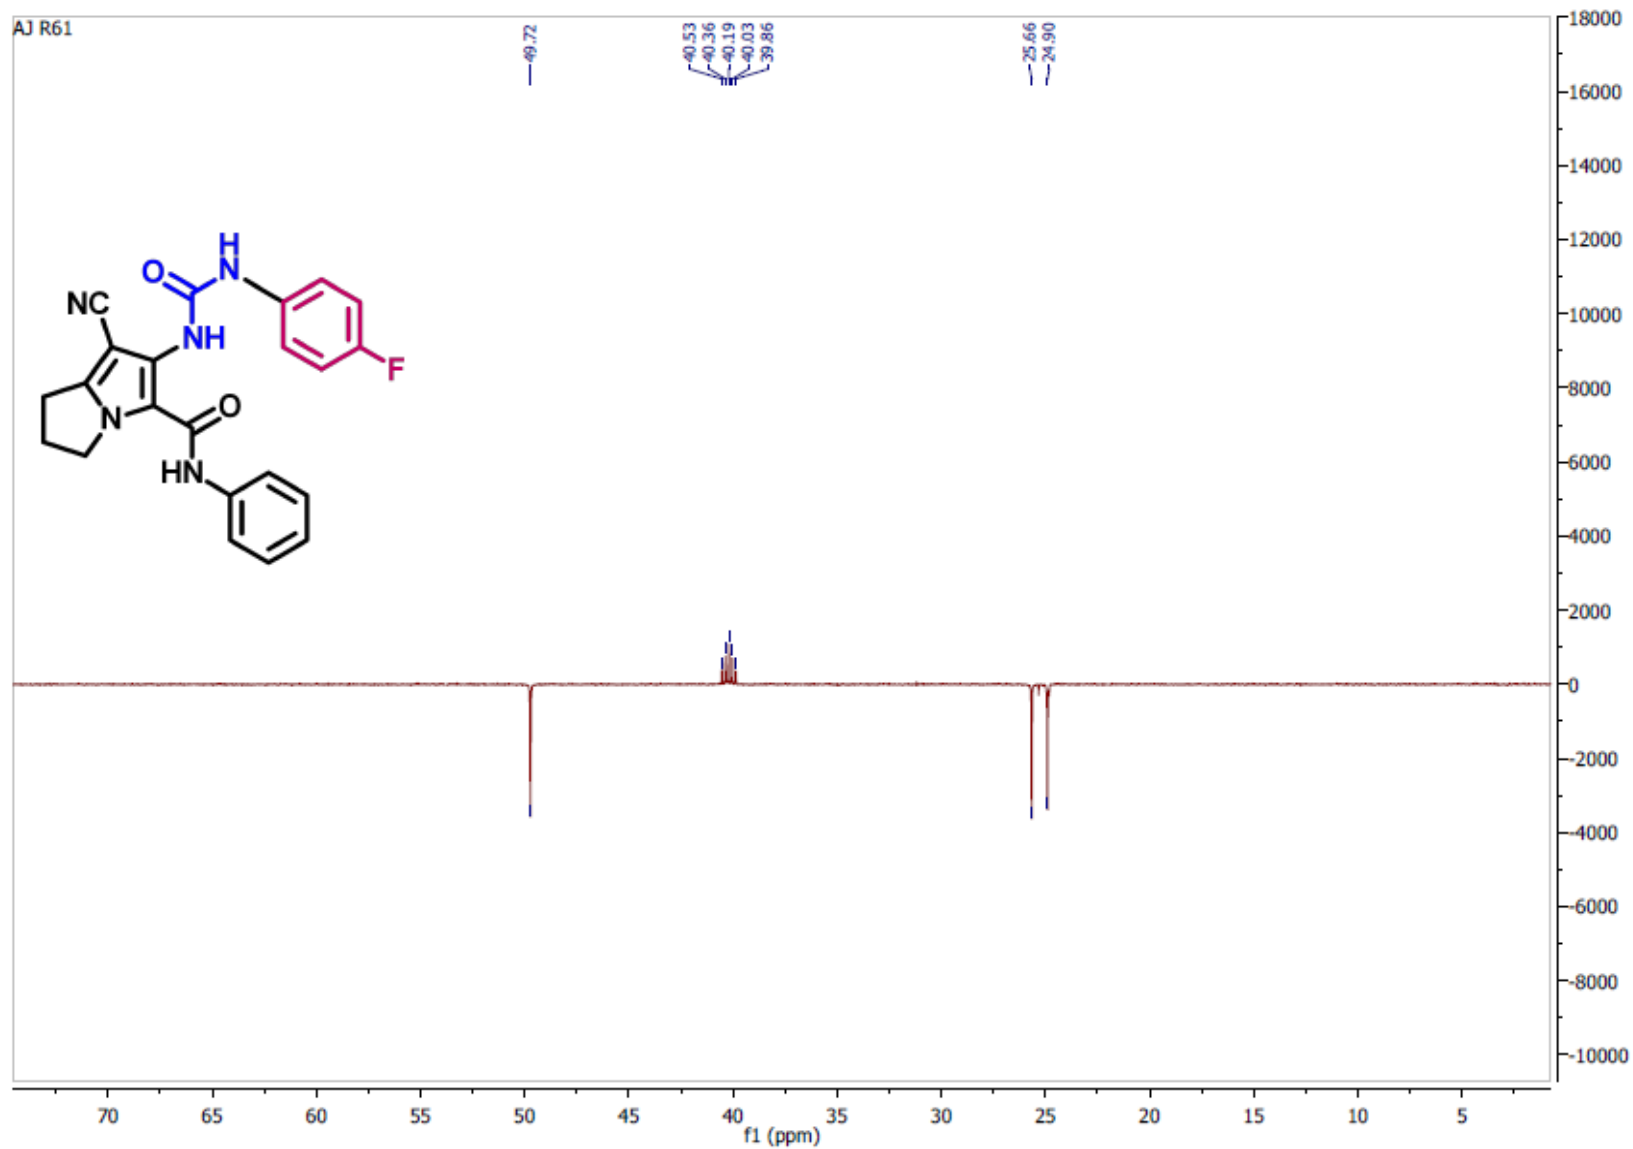

Figure S101. DEPT C<sup>135</sup> spectrum of compound **18a** (zoom, aromatic CH groups)

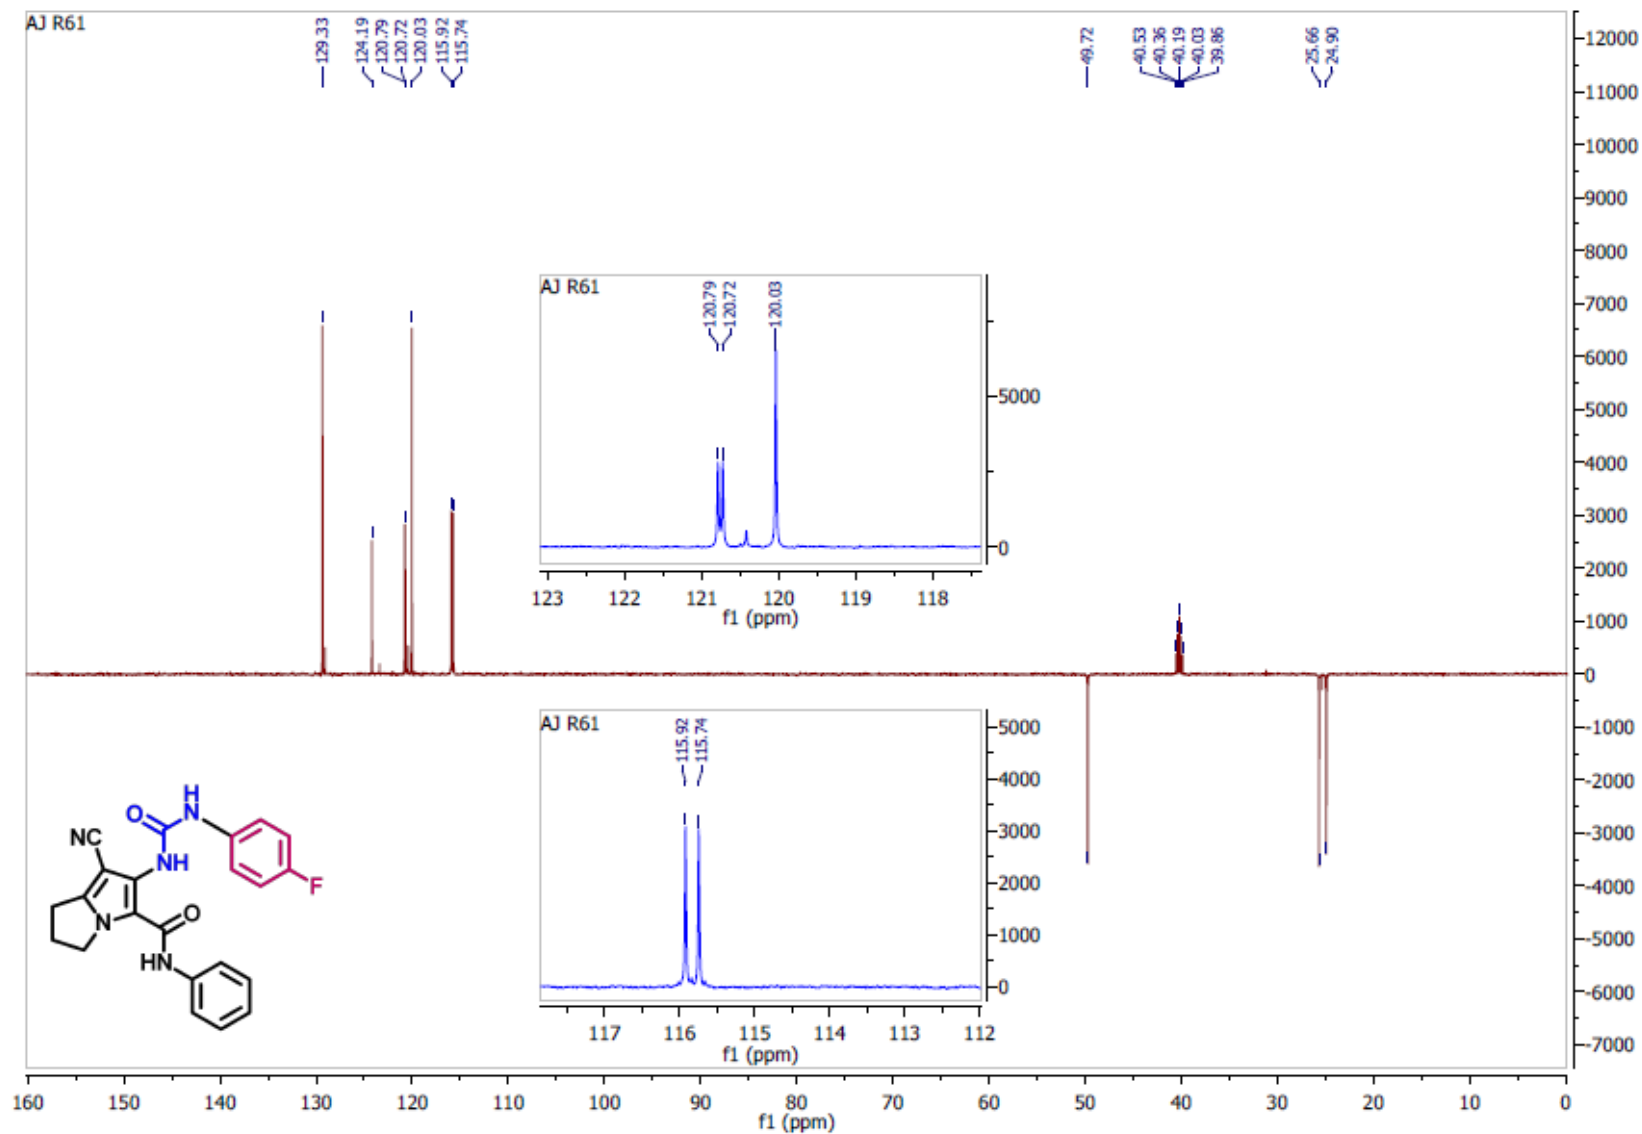

Figure S102. <sup>1</sup>H-NMR (DMSO, 500 MHz, δ ppm) spectrum of compound **18b**

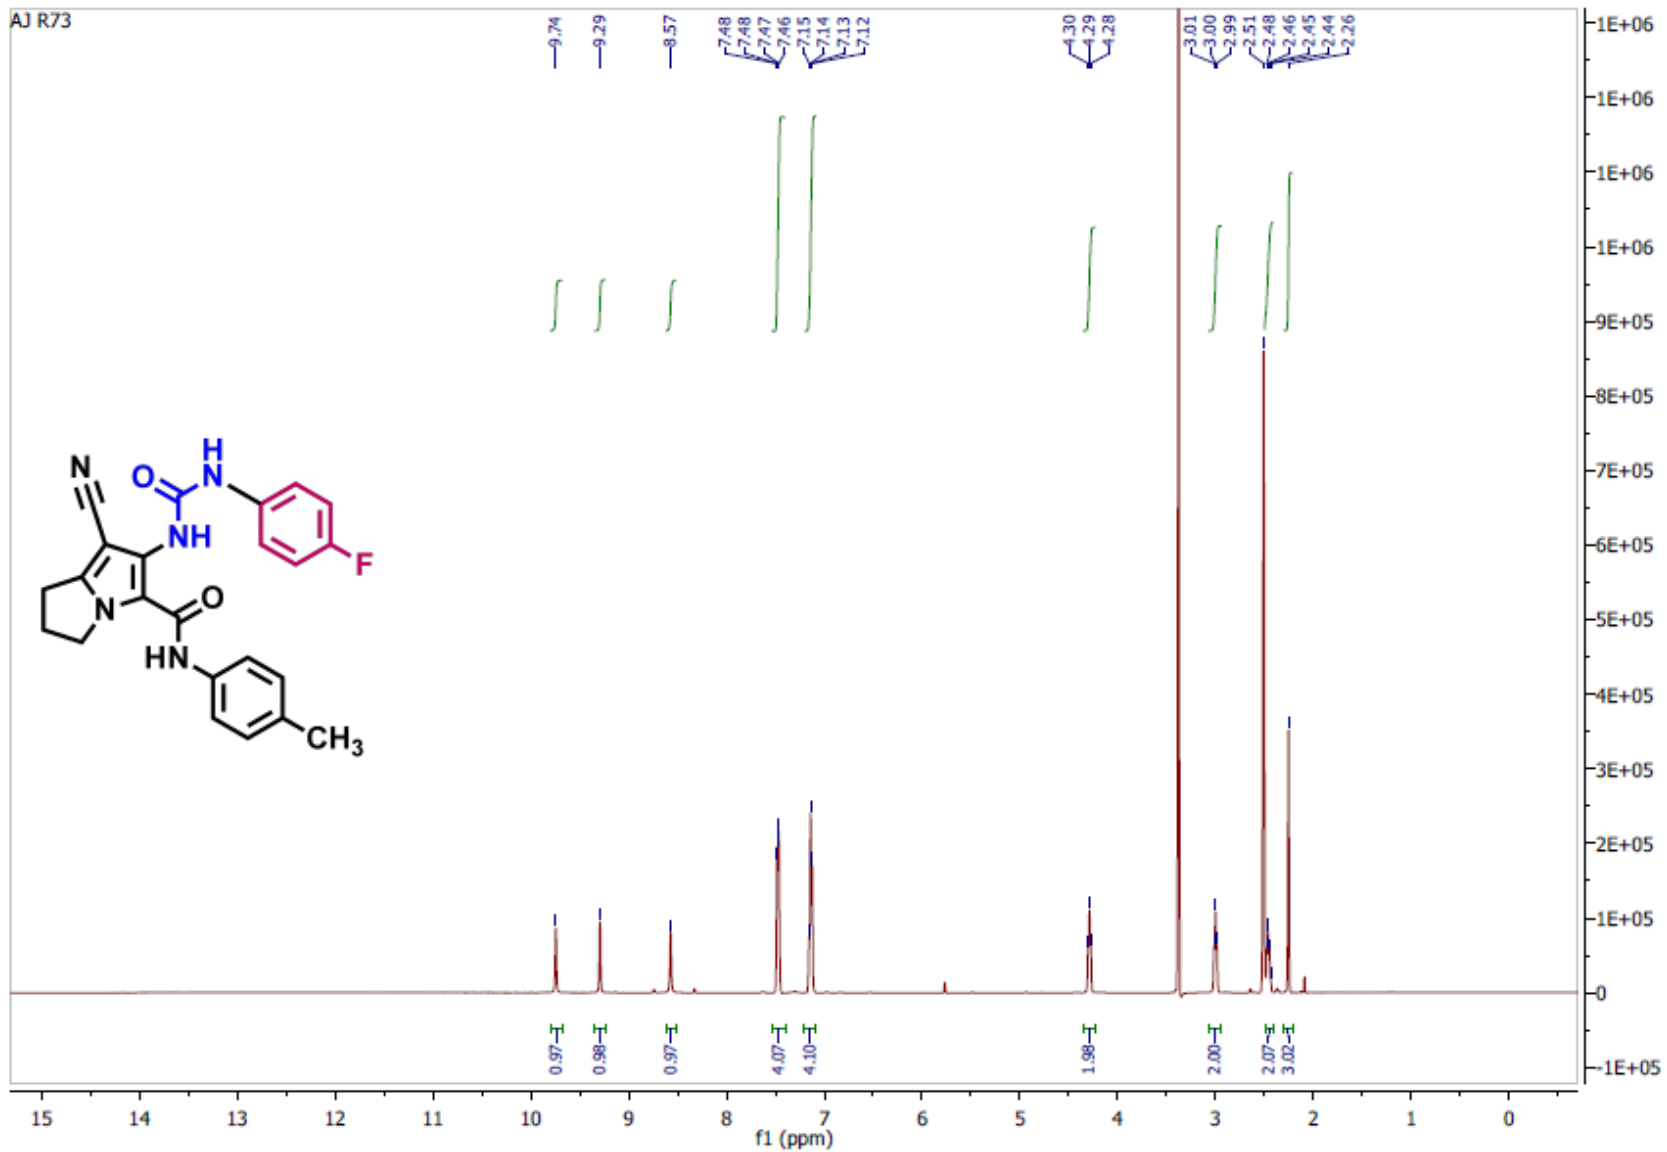



**Figure S103.**  $^1\text{H-NMR}$  (DMSO, 500 MHz,  $\delta$  ppm) spectrum of compound **18b** (zoom on aliphatic/aromatic Hs)

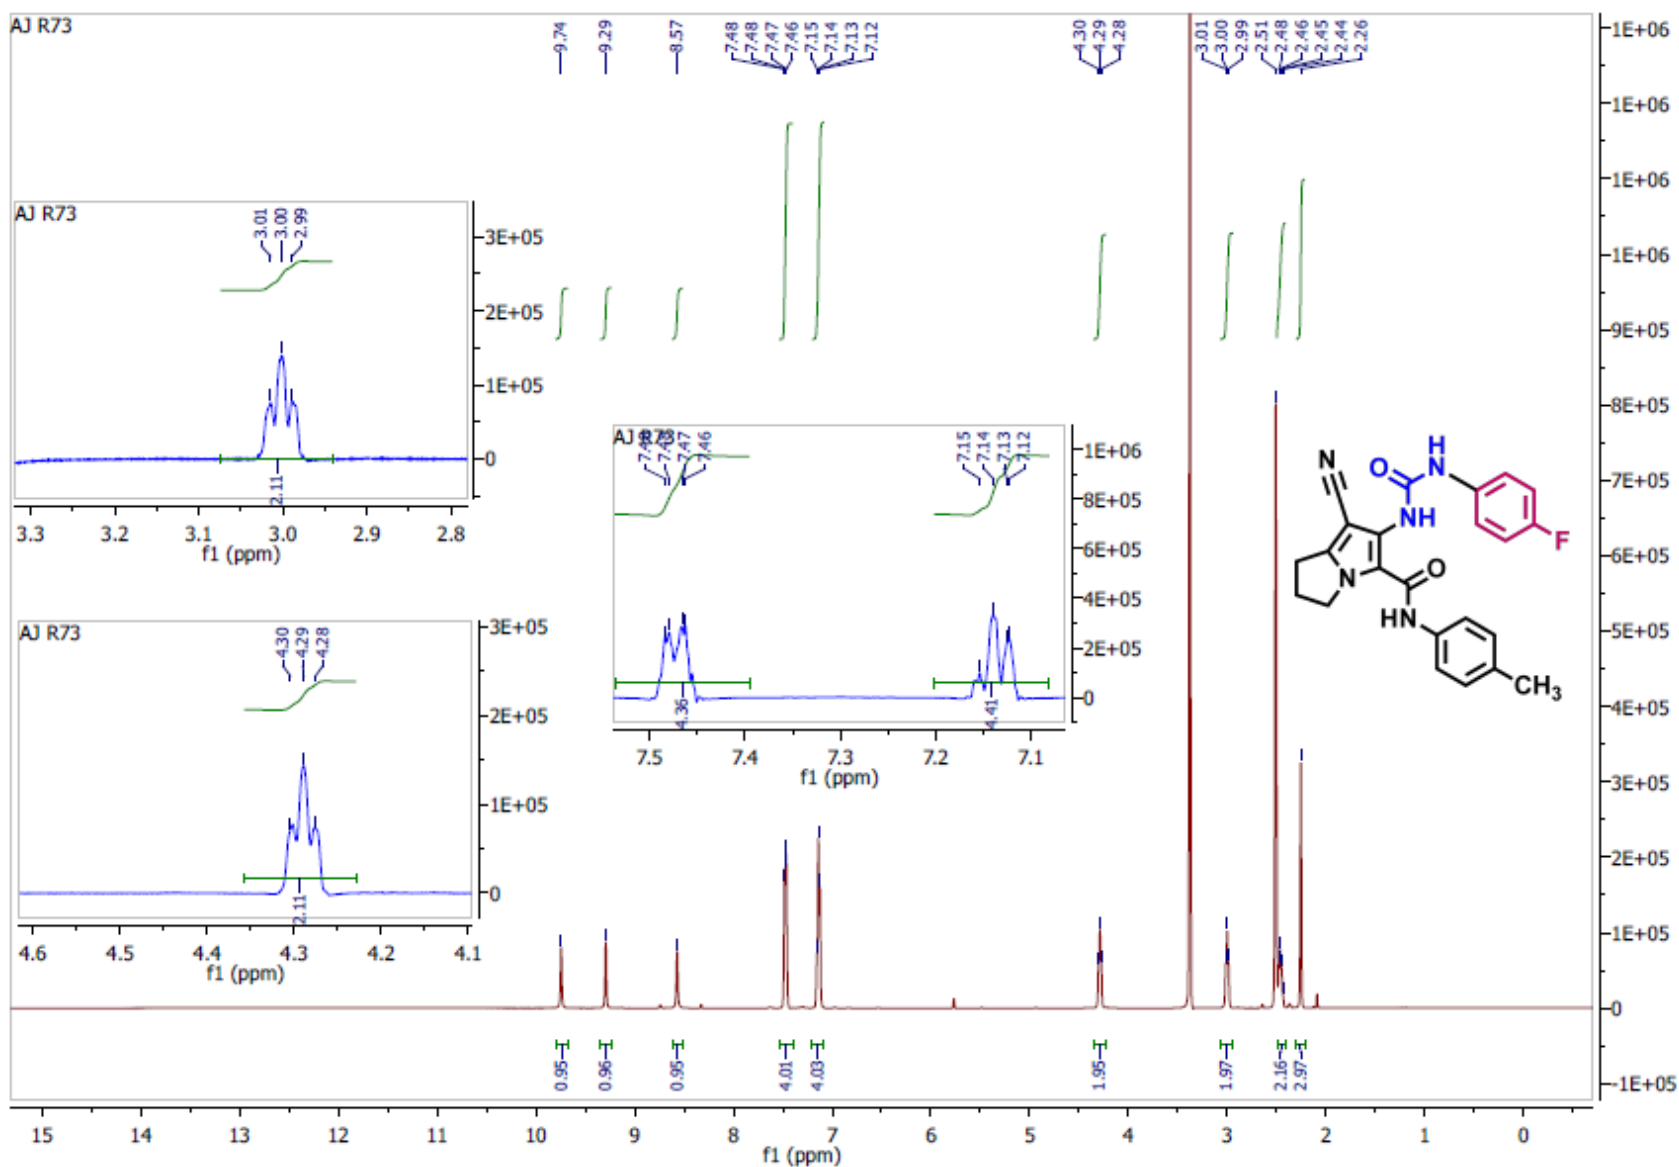

Figure S104.  $^{13}\text{C}$ -NMR (DMSO, 125 MHz,  $\delta$  ppm) spectrum of compound **18b**

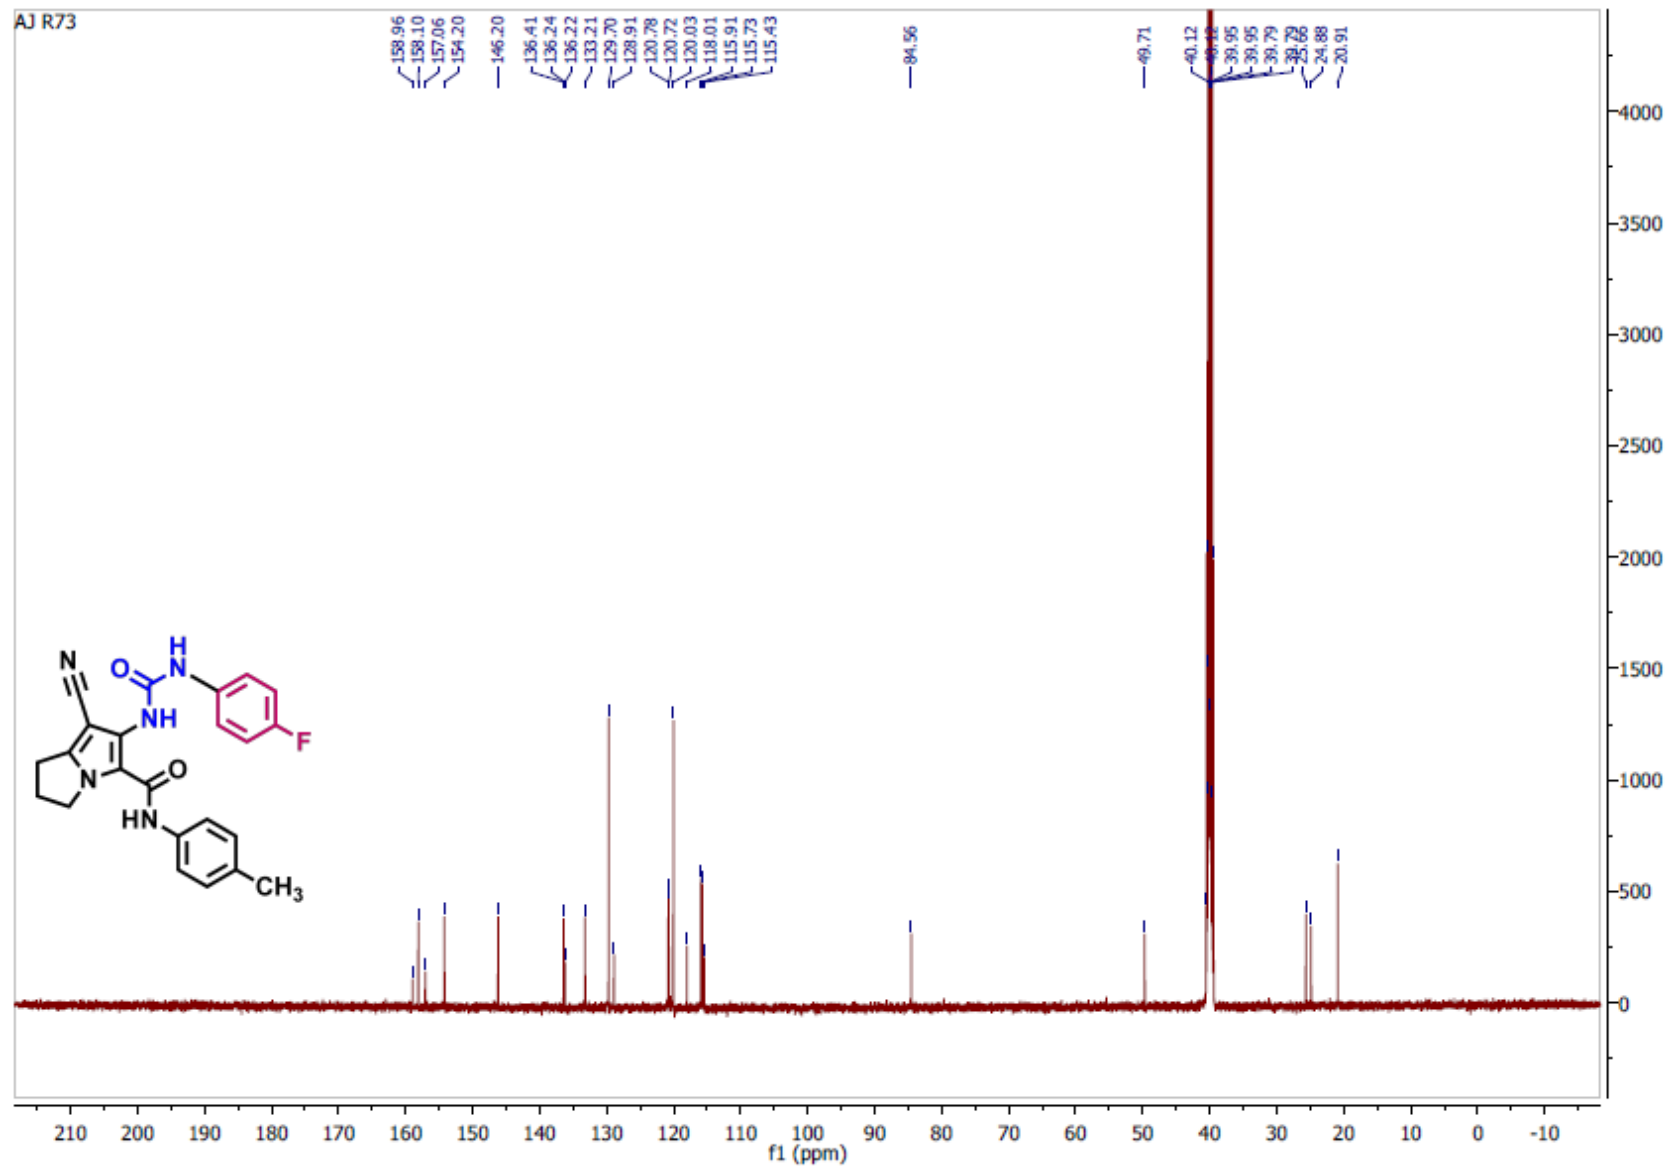

Figure S105.  $^{13}\text{C}$ -NMR (DMSO, 125 MHz,  $\delta$  ppm) spectrum of compound **18b** (zoom on aliphatic Cs)

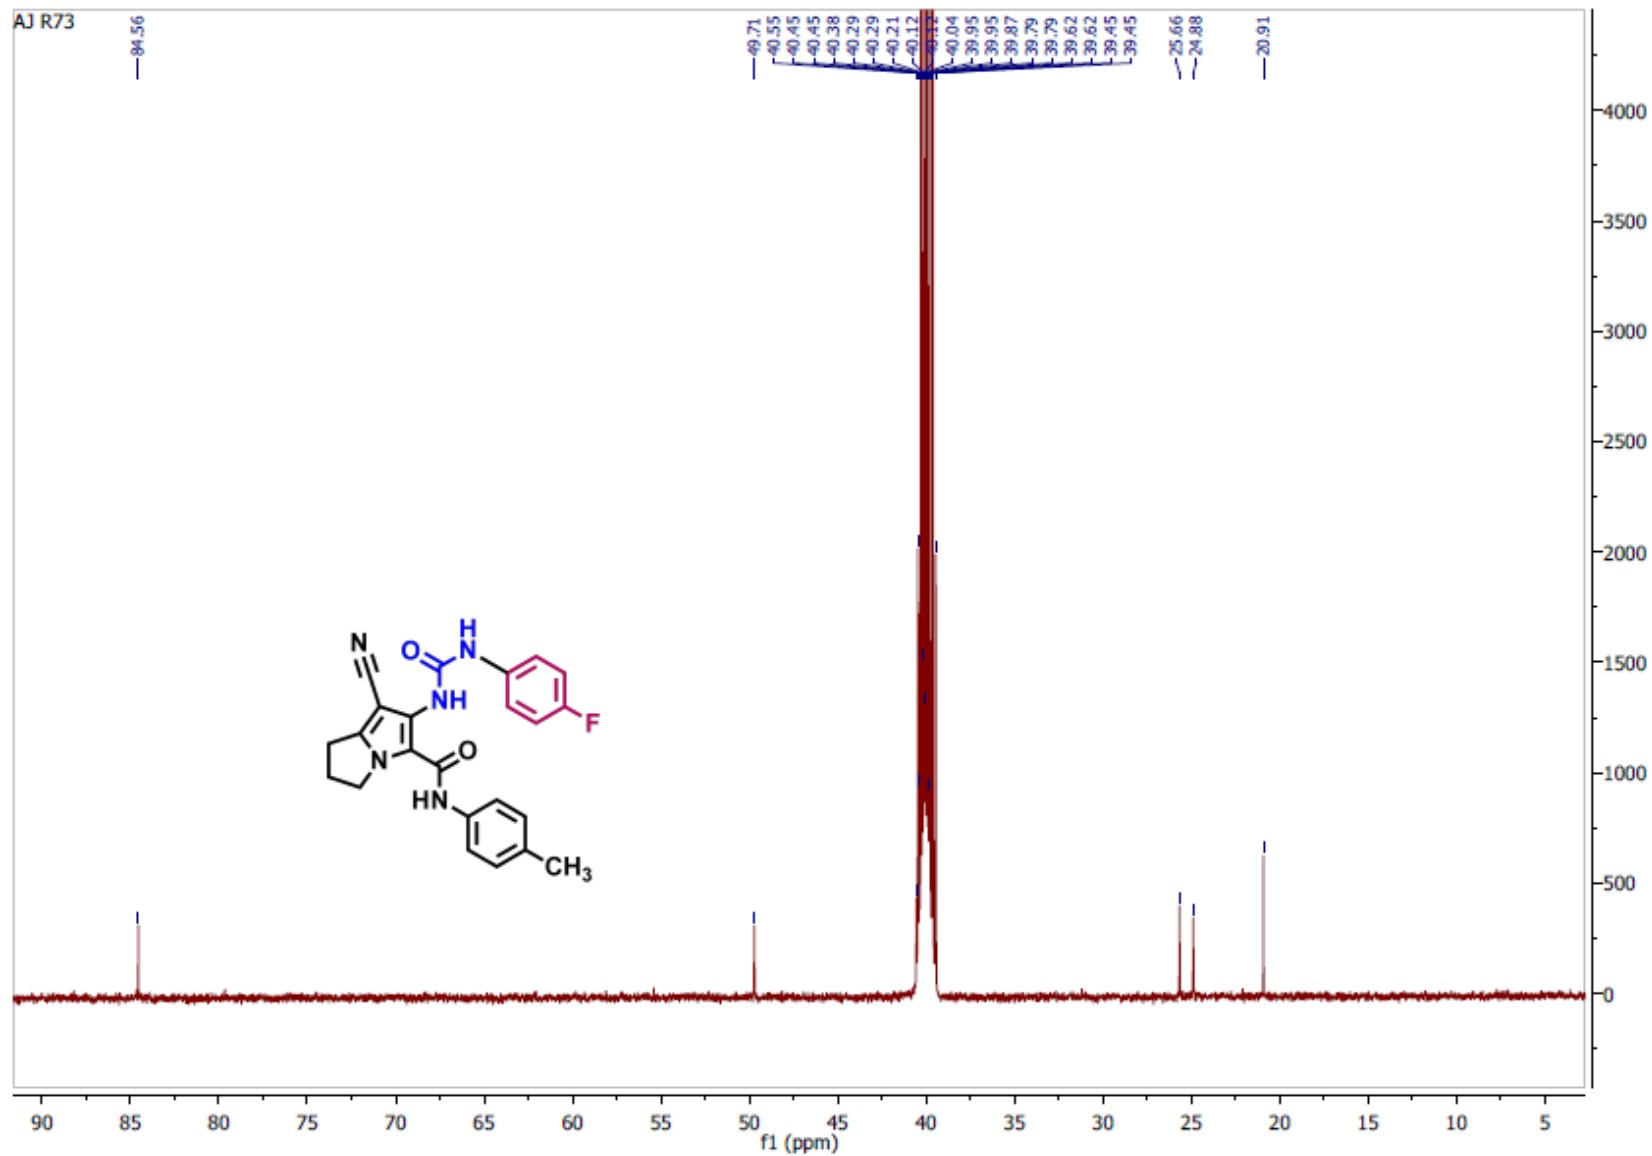

Figure S106.  $^{13}\text{C}$ -NMR (DMSO, 125 MHz,  $\delta$  ppm) spectrum of compound **18b** (zoom on aromatic Cs)

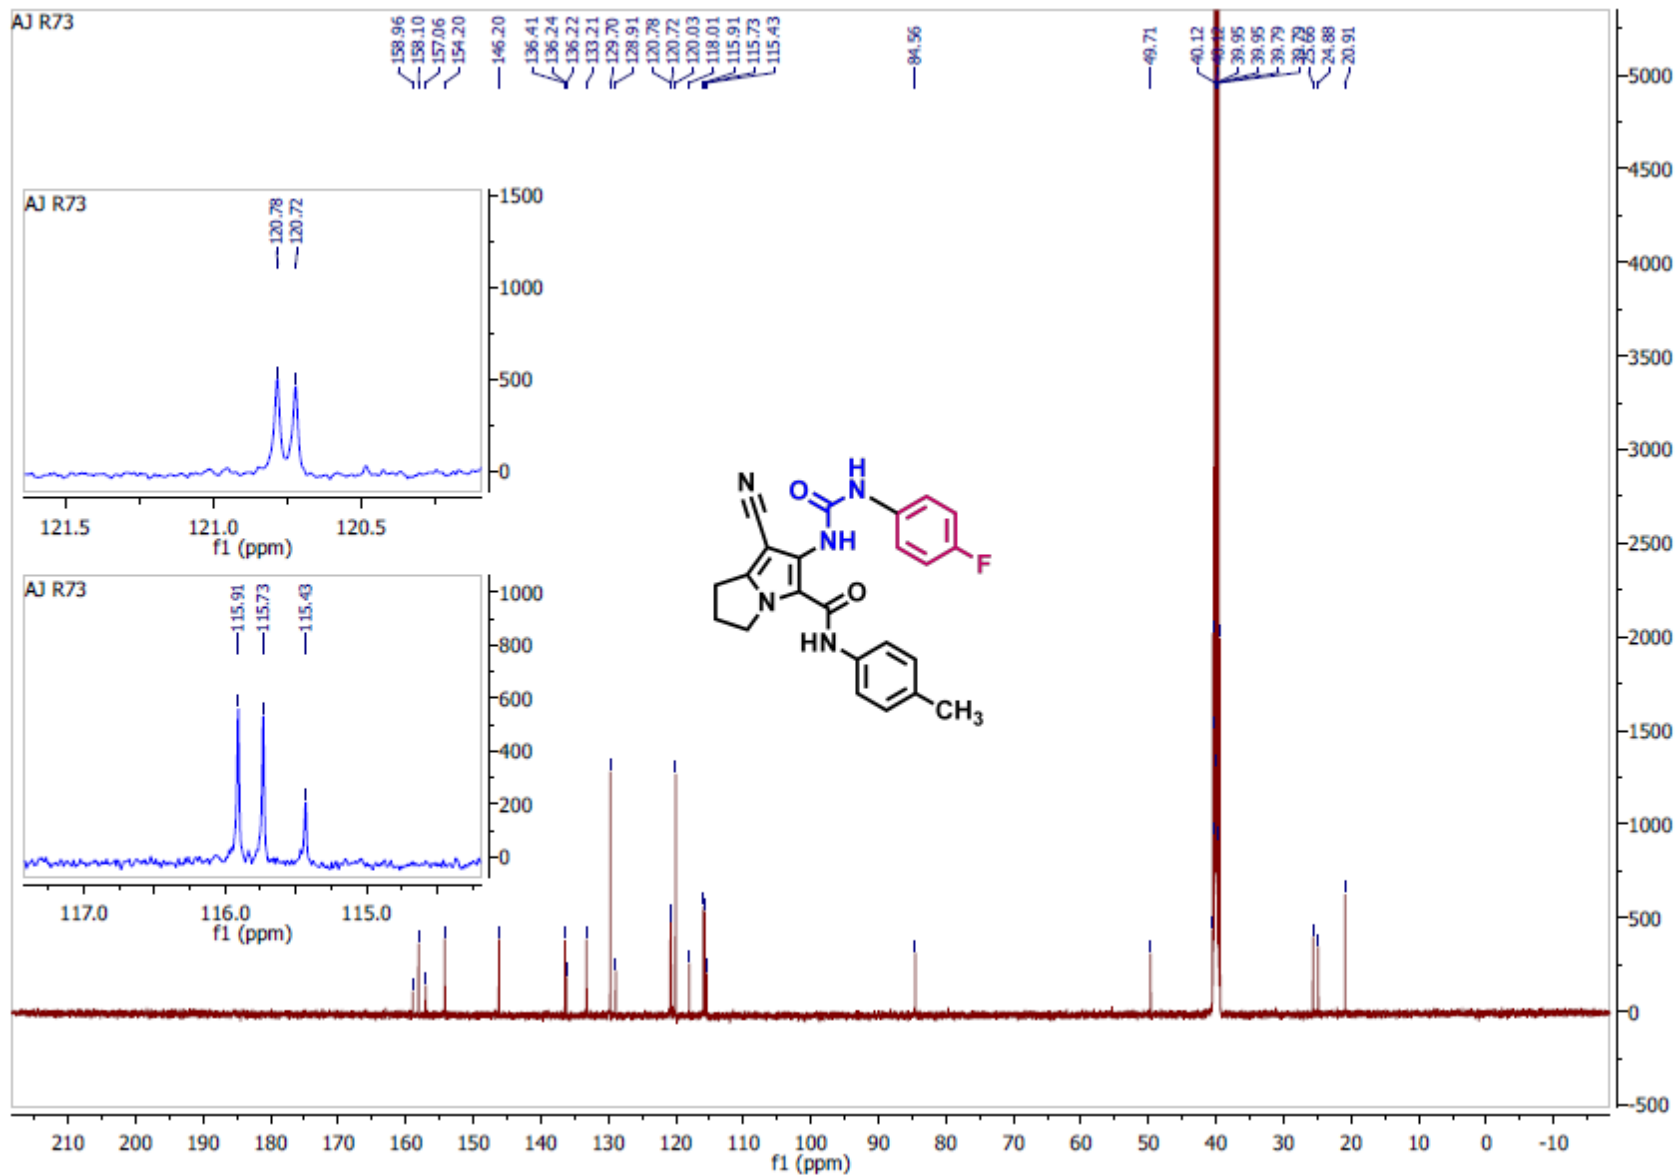

Figure S107.  $^{13}\text{C}$ -NMR (DMSO, 125 MHz,  $\delta$  ppm) spectrum of compound **18b** (zoom on aromatic Cs)

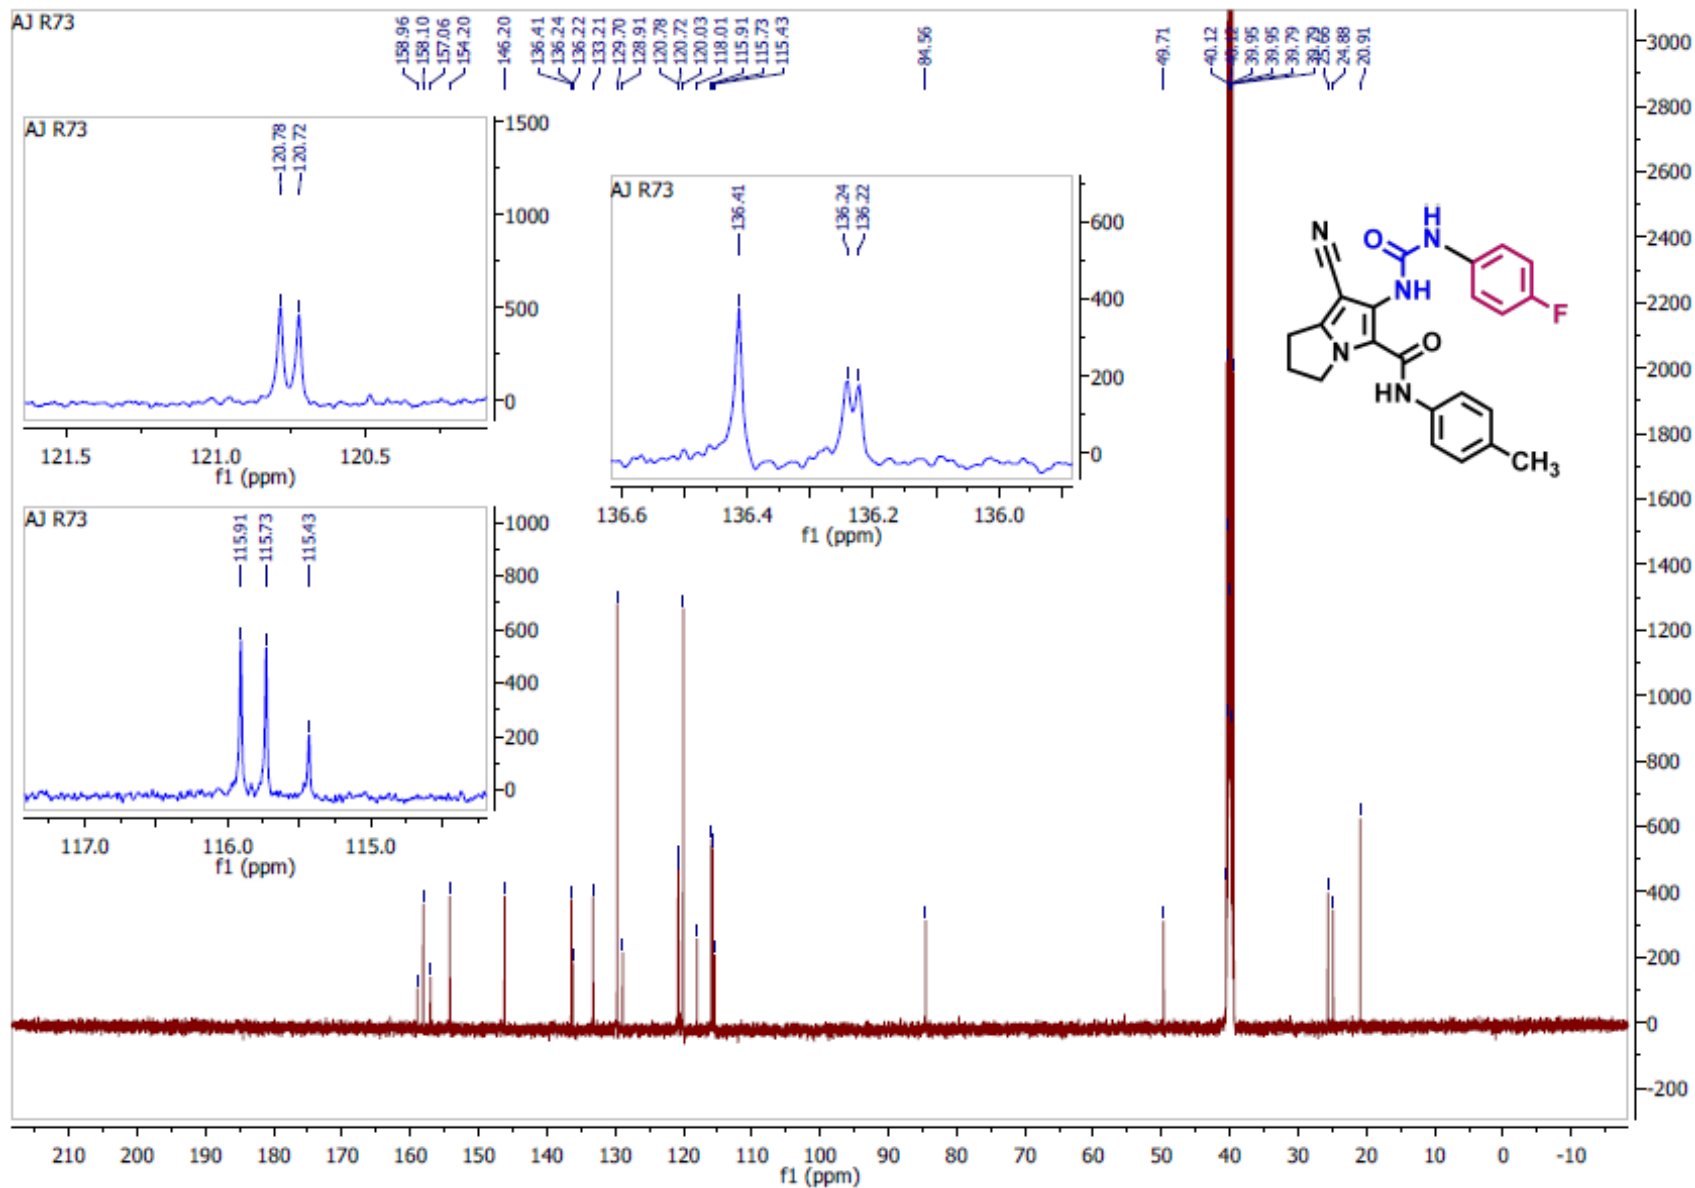

Figure S108. DEPT  $C^{135}$  (DMSO, 125 MHz,  $\delta$  ppm) of compound **18b**.

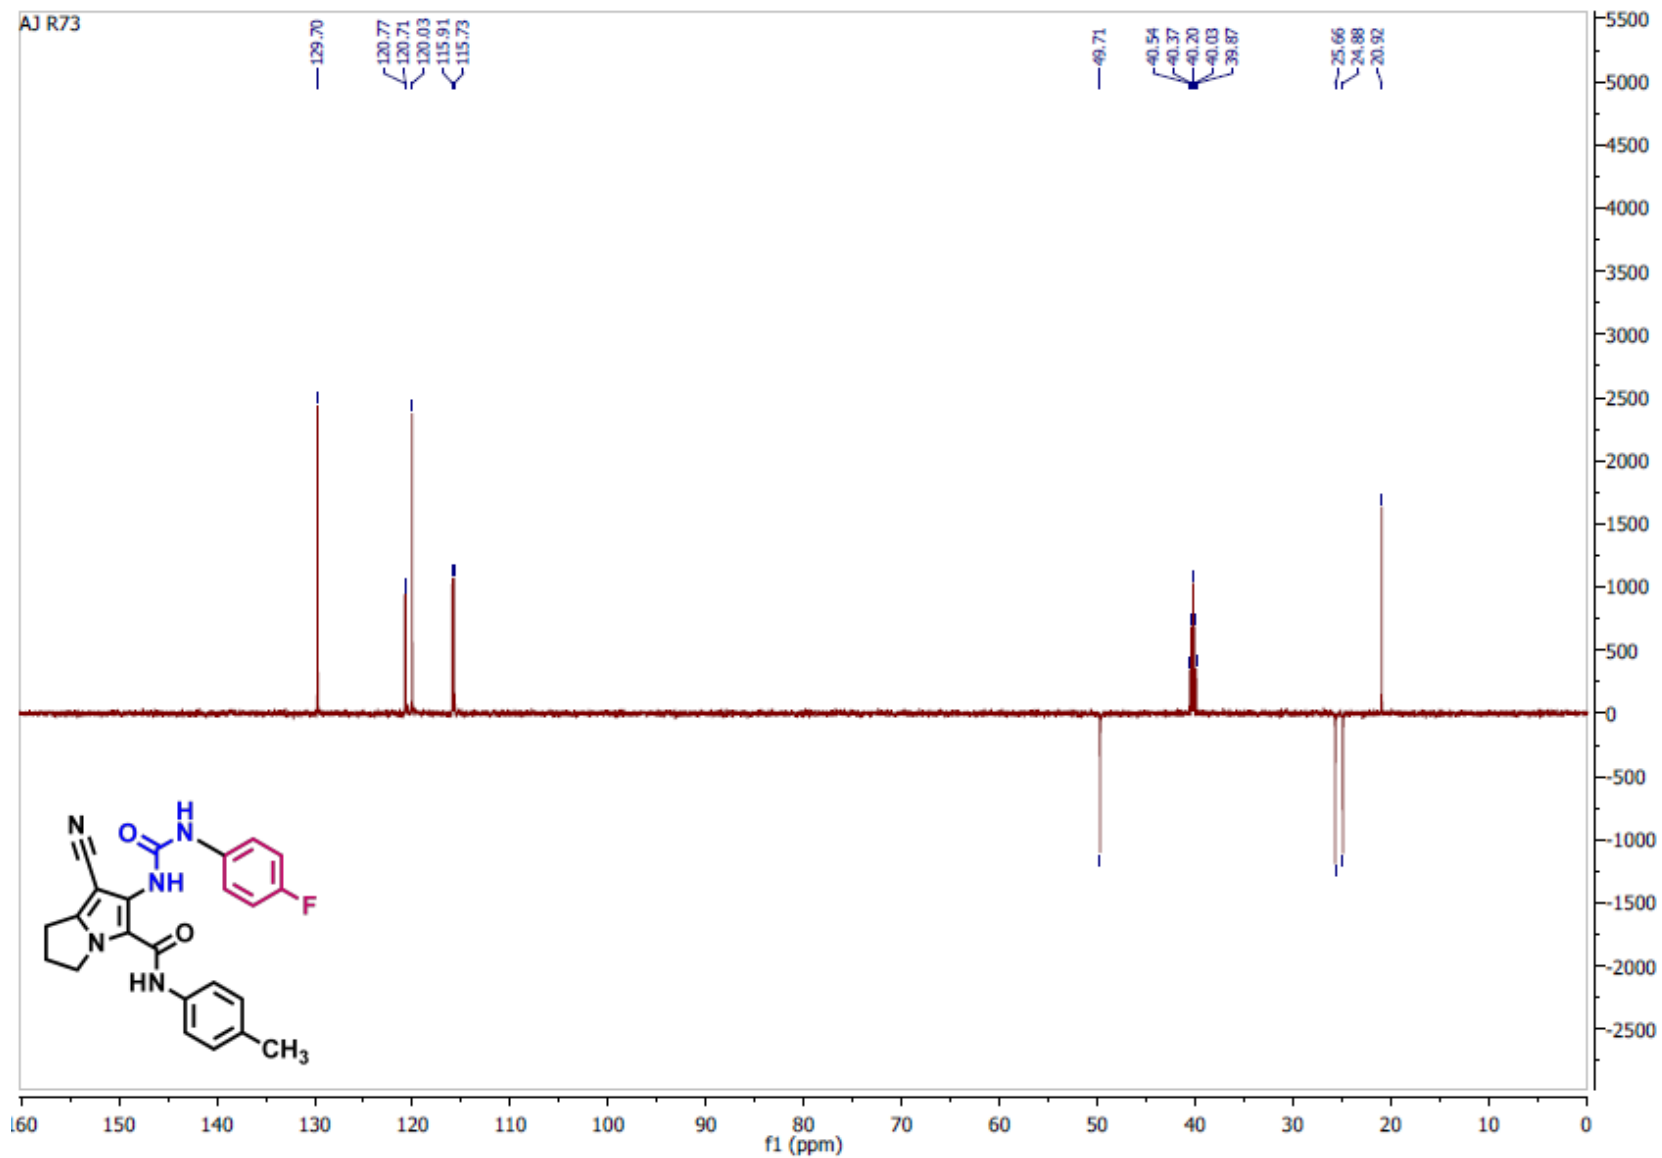

Figure S109. DEPT C<sup>135</sup> spectrum of compound **18b** (zoom on aromatic Cs)

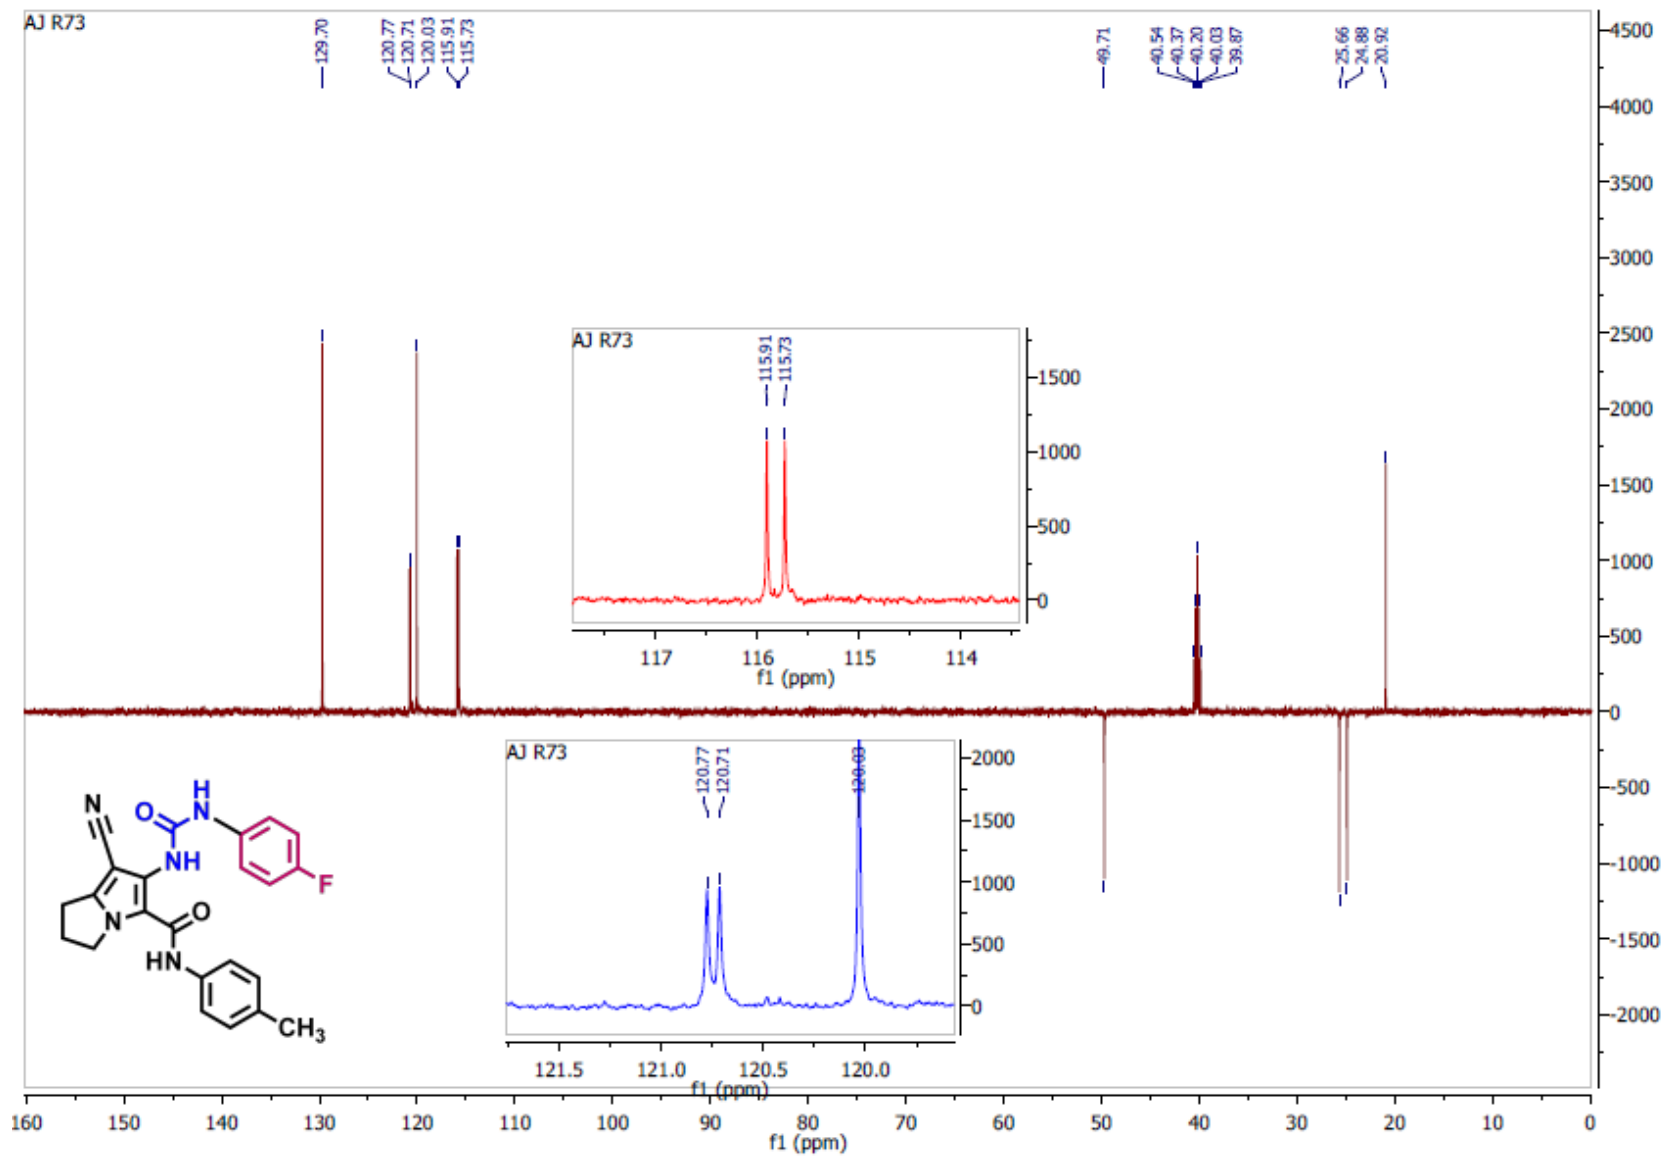

Figure S110.  $^1\text{H-NMR}$  (DMSO, 500 MHz,  $\delta$  ppm) spectrum of compound **18c**.

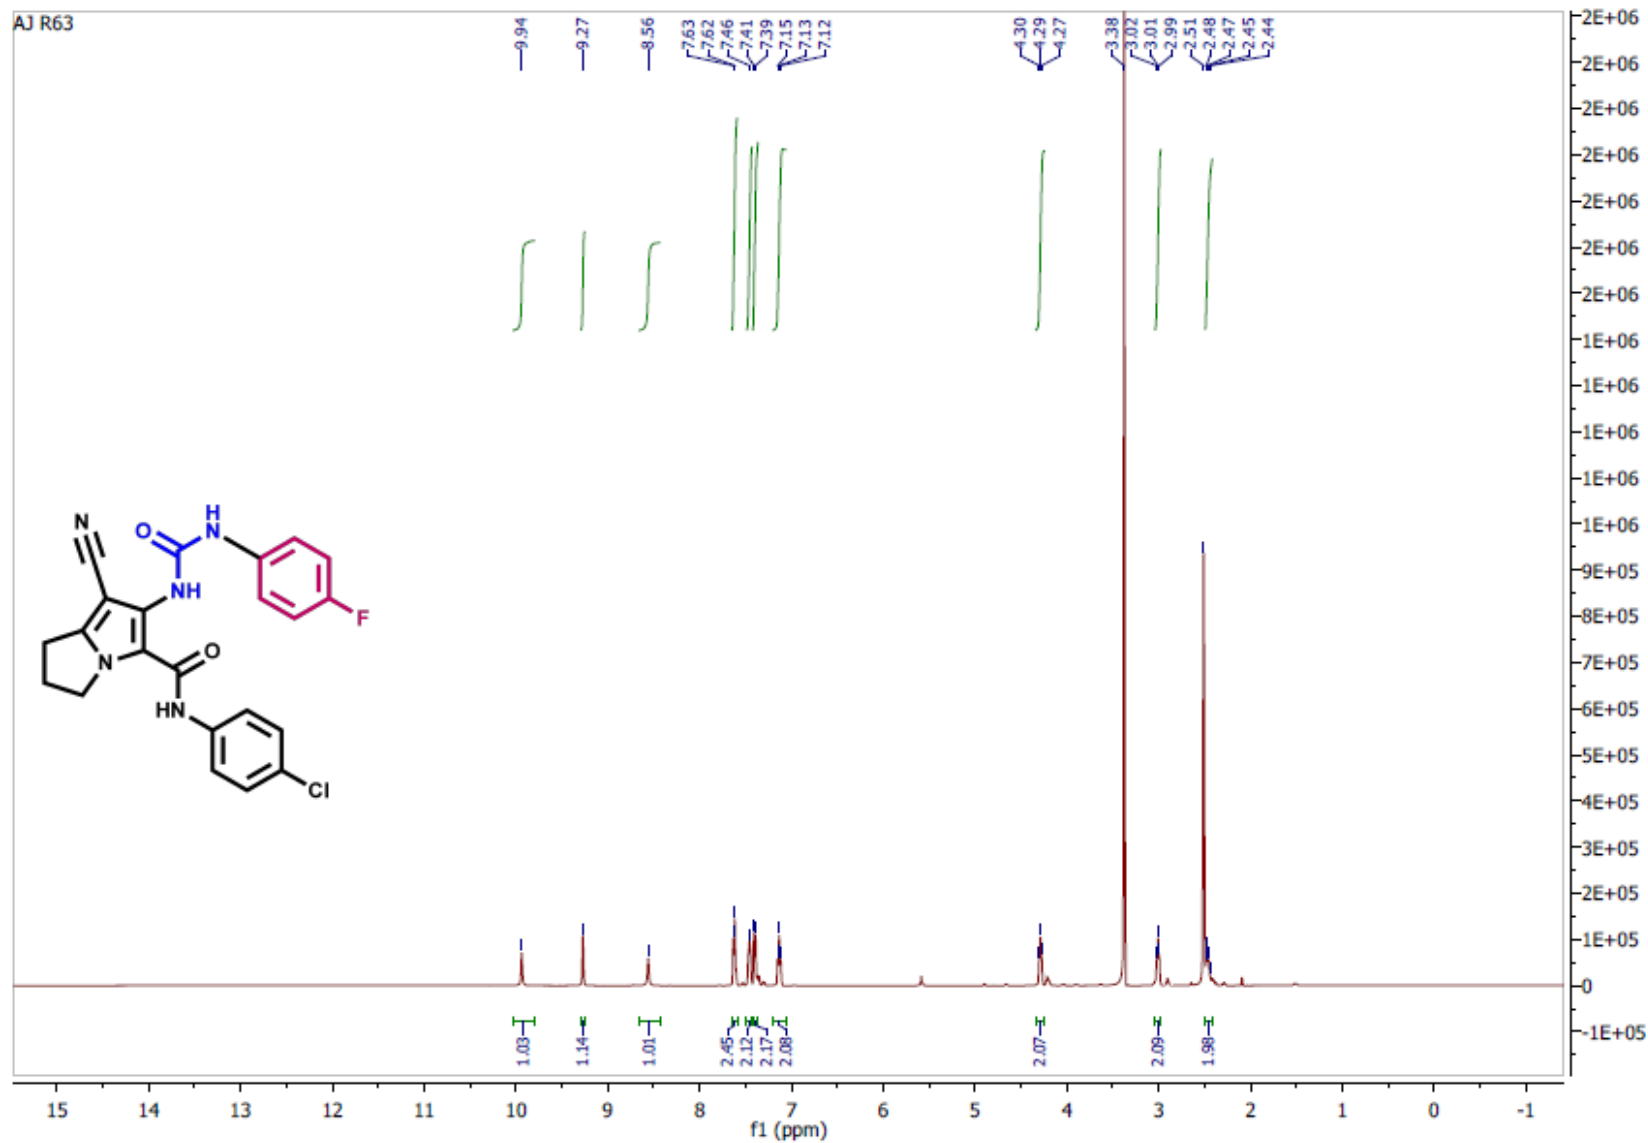



Figure S111.  $^1\text{H-NMR}$  (DMSO, 500 MHz,  $\delta$  ppm) spectrum of compound **18c** (zoom on aromatic Hs)

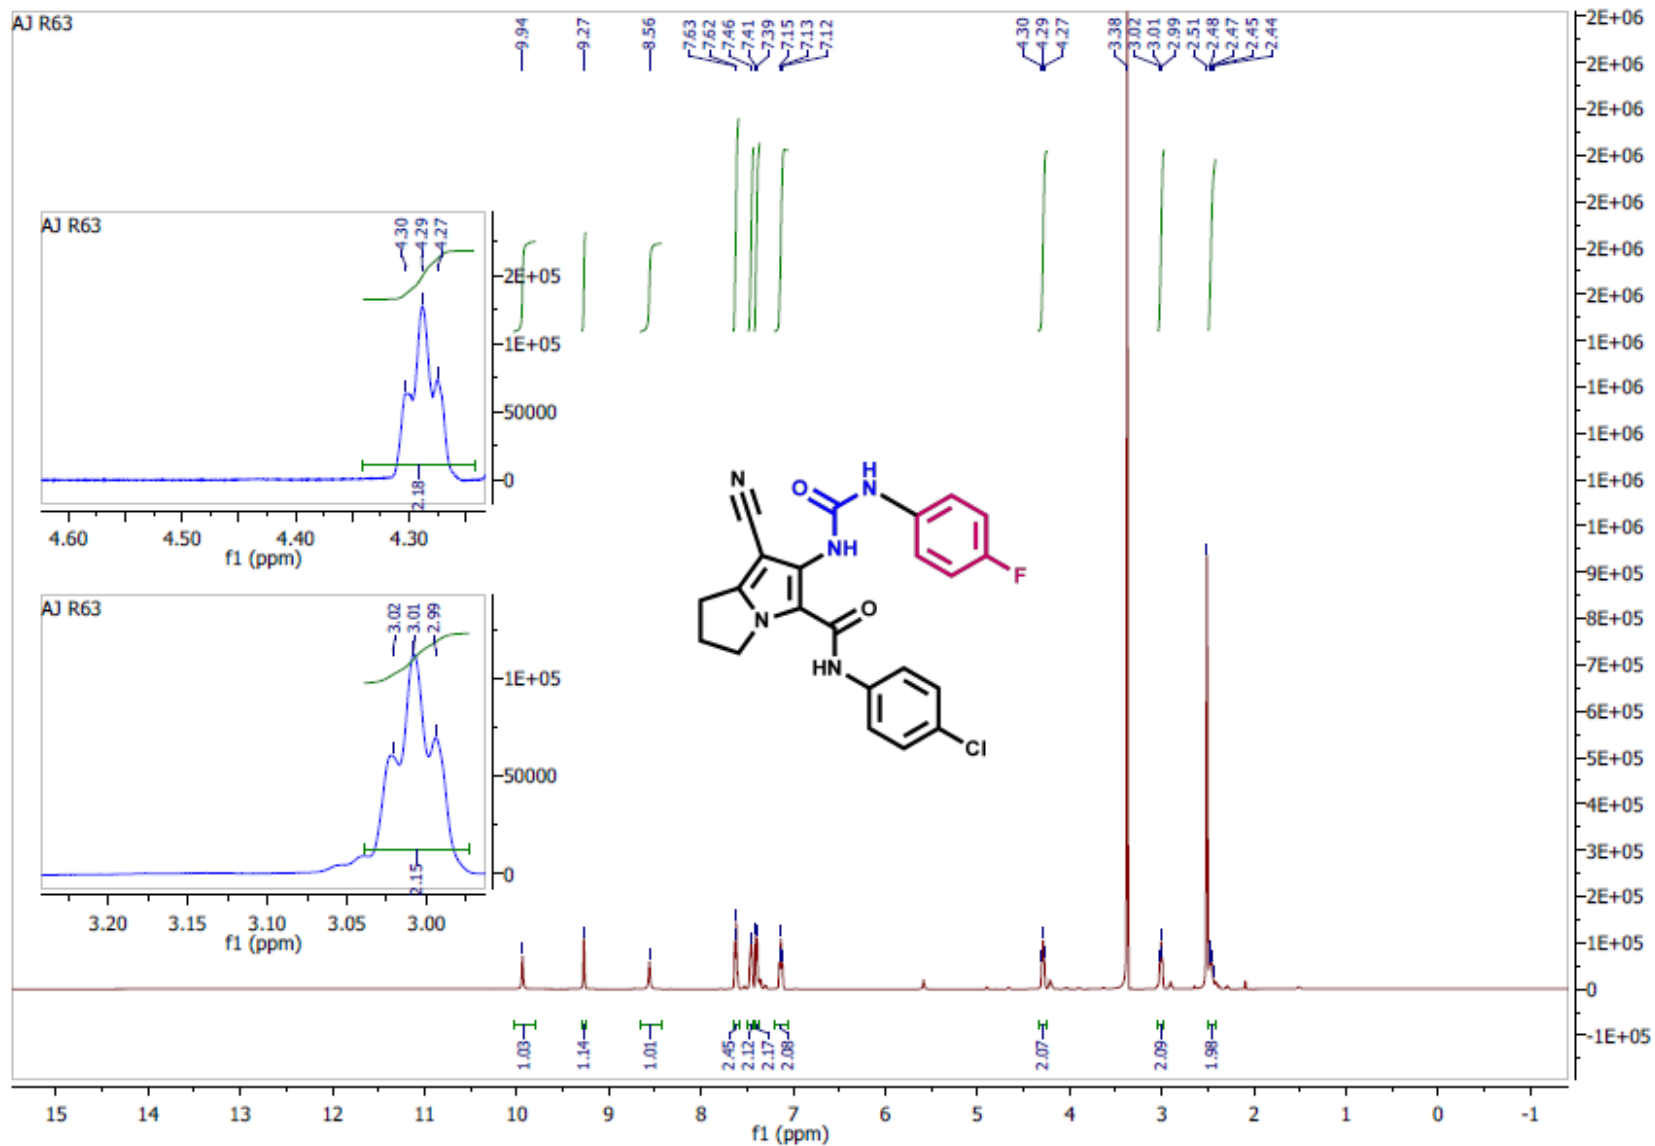

Figure S112. <sup>1</sup>H-NMR (DMSO, 500 MHz, δ ppm) spectrum of compound **18c** (zoom on aliphatic/aromatic Hs)

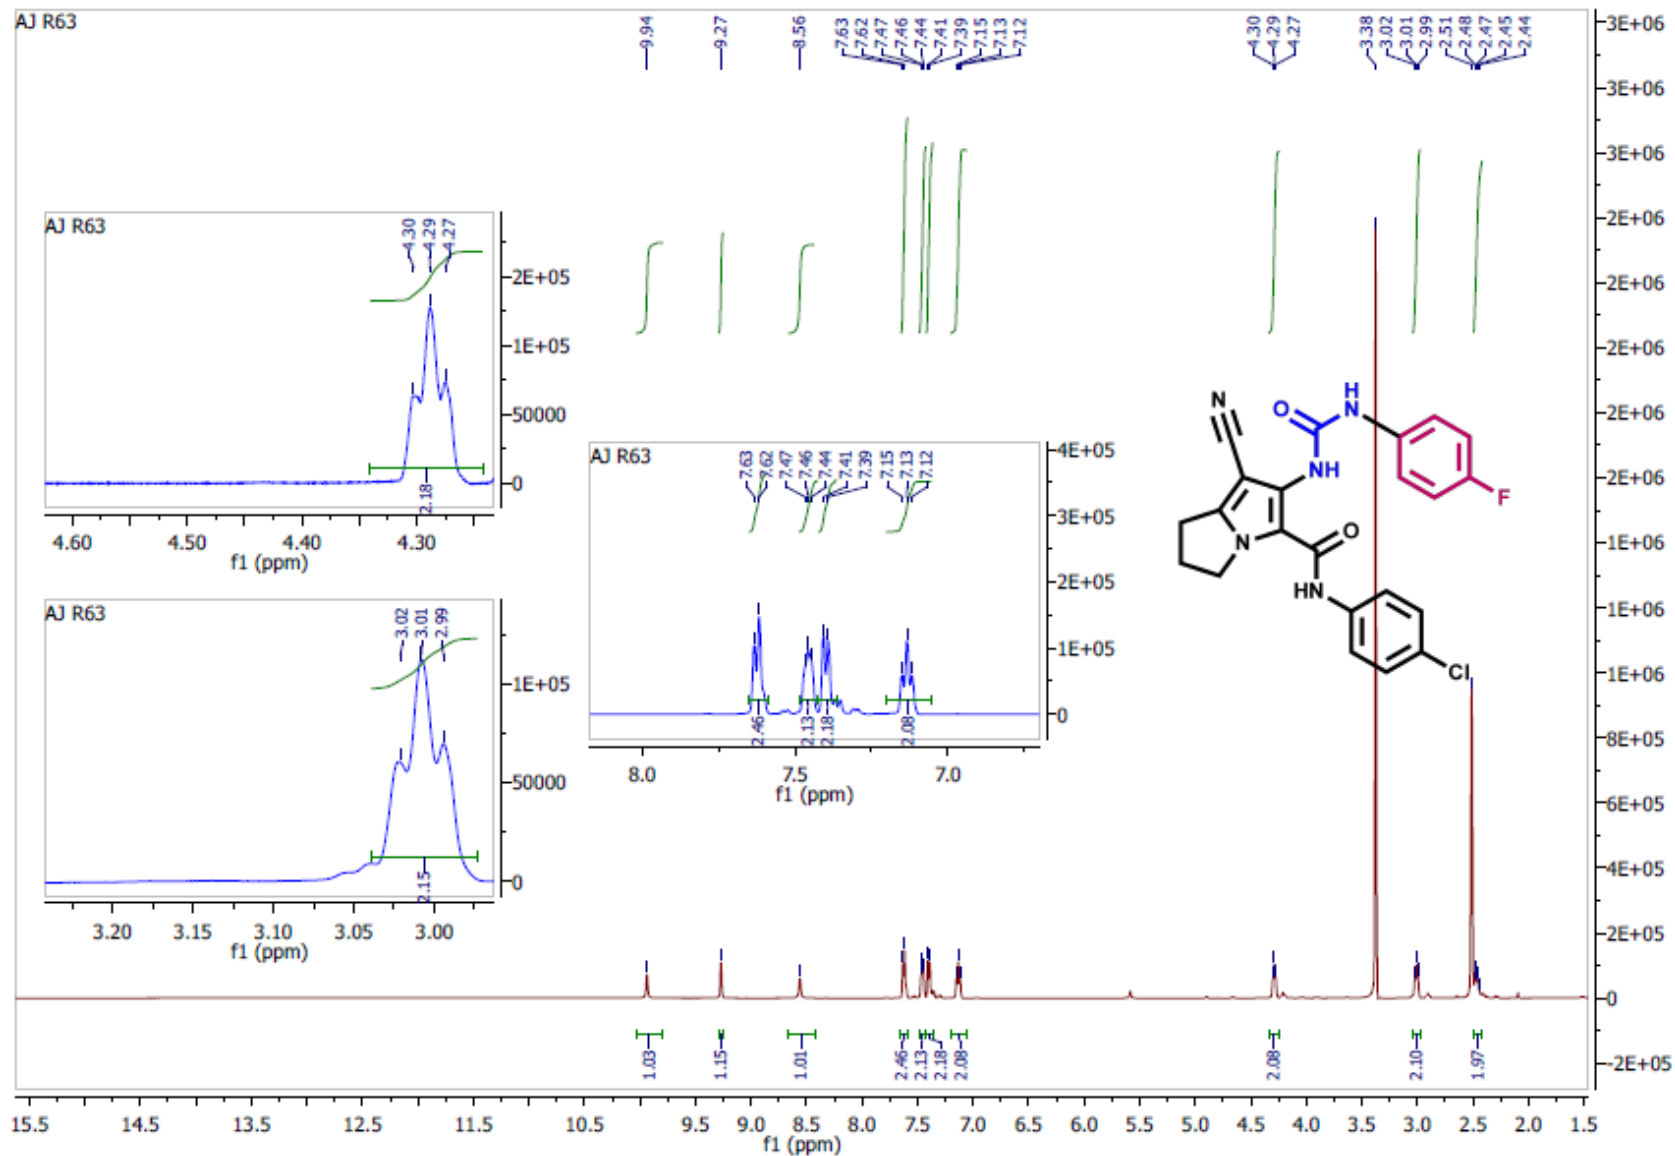

Figure S113.  $^{13}\text{C}$ -NMR (DMSO, 125 MHz,  $\delta$  ppm) spectrum of compound **18c**

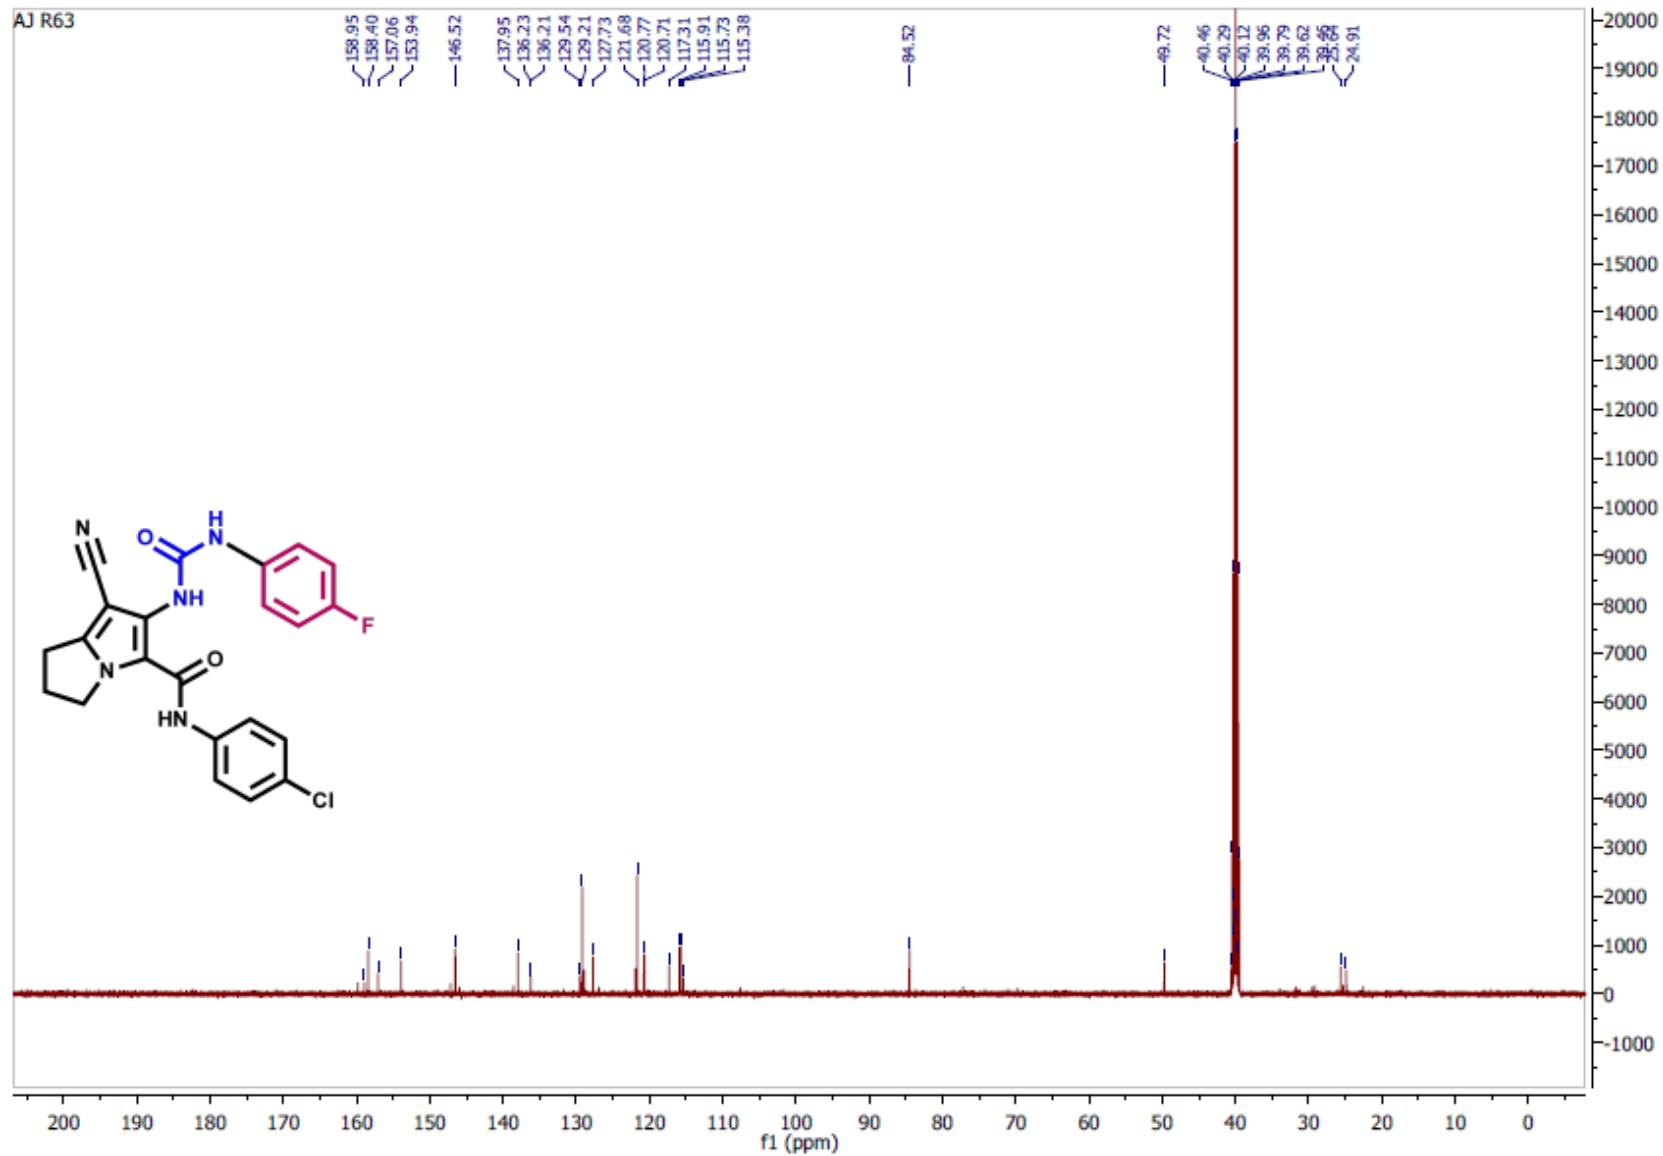

Figure S114.  $^{13}\text{C}$ -NMR (DMSO, 125 MHz,  $\delta$  ppm) spectrum of compound **18c** (zoom on aromatic C-F Cs)

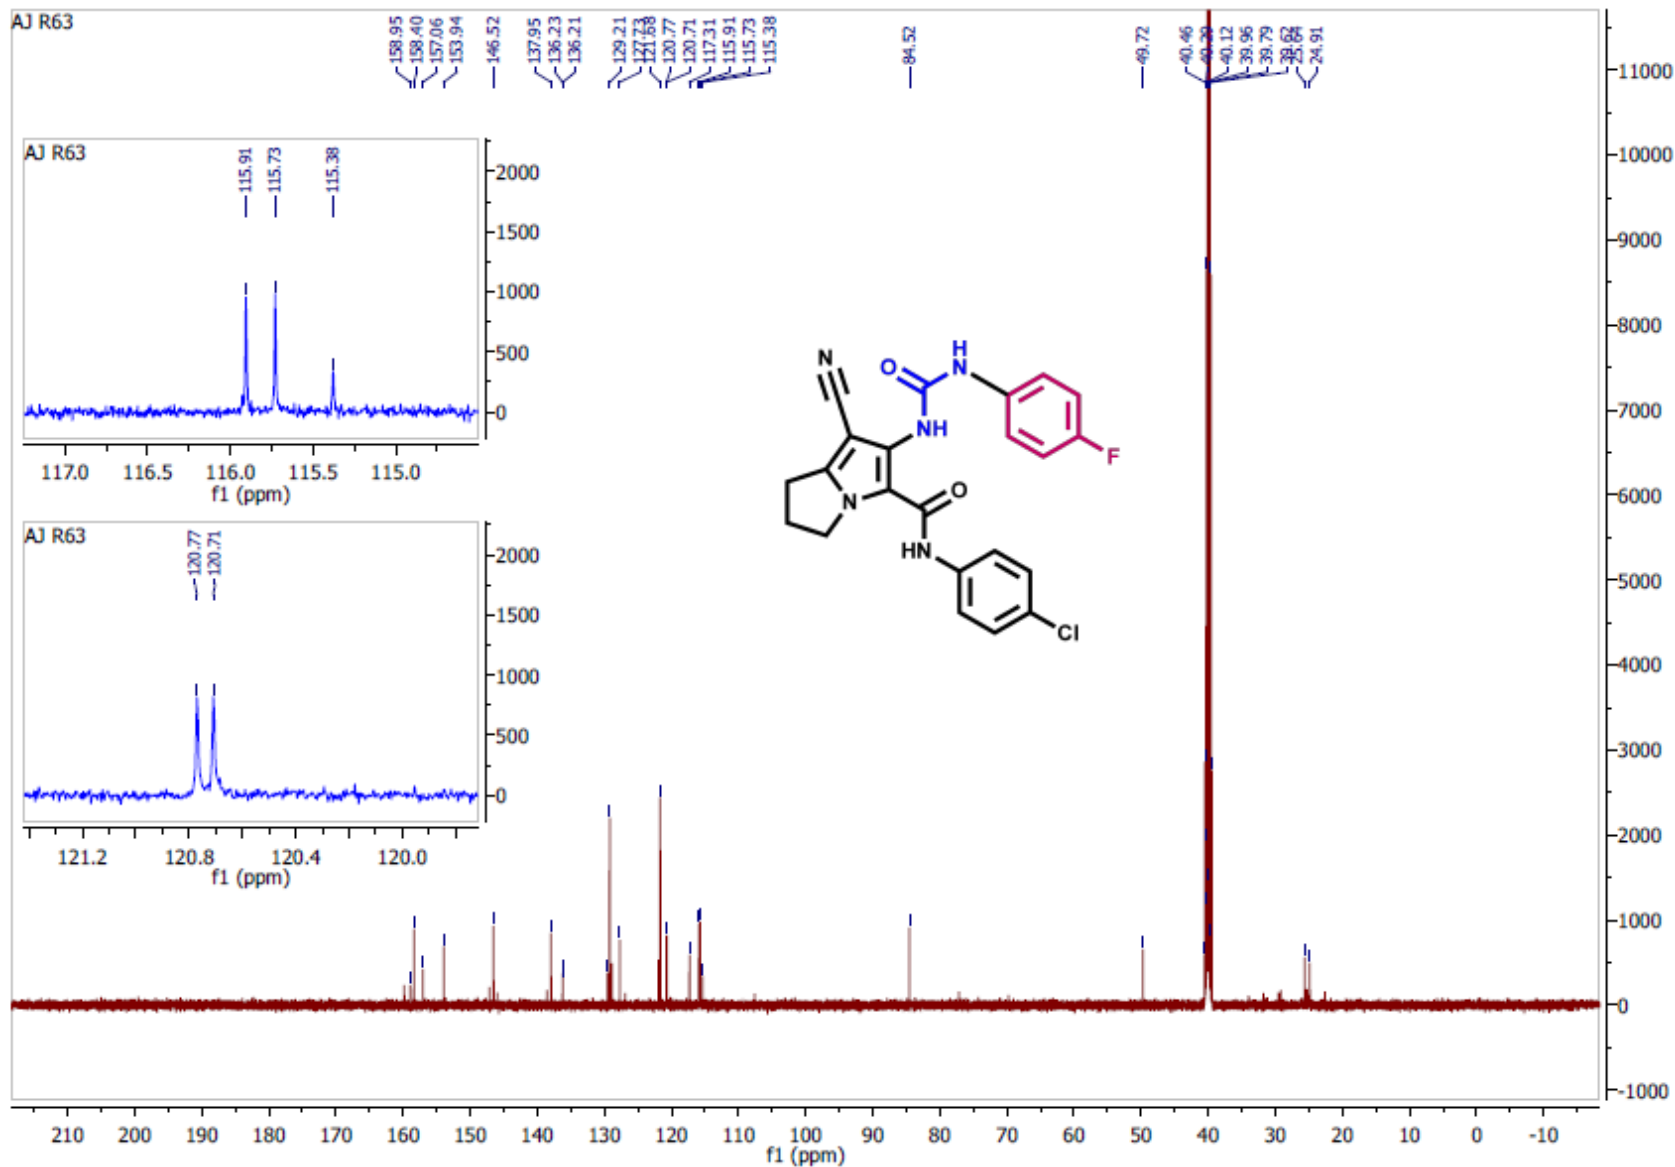

Figure S115.  $^{13}\text{C}$ -NMR (DMSO, 125 MHz,  $\delta$  ppm) spectrum of compound **18c** (zoom on aromatic C-F Cs)

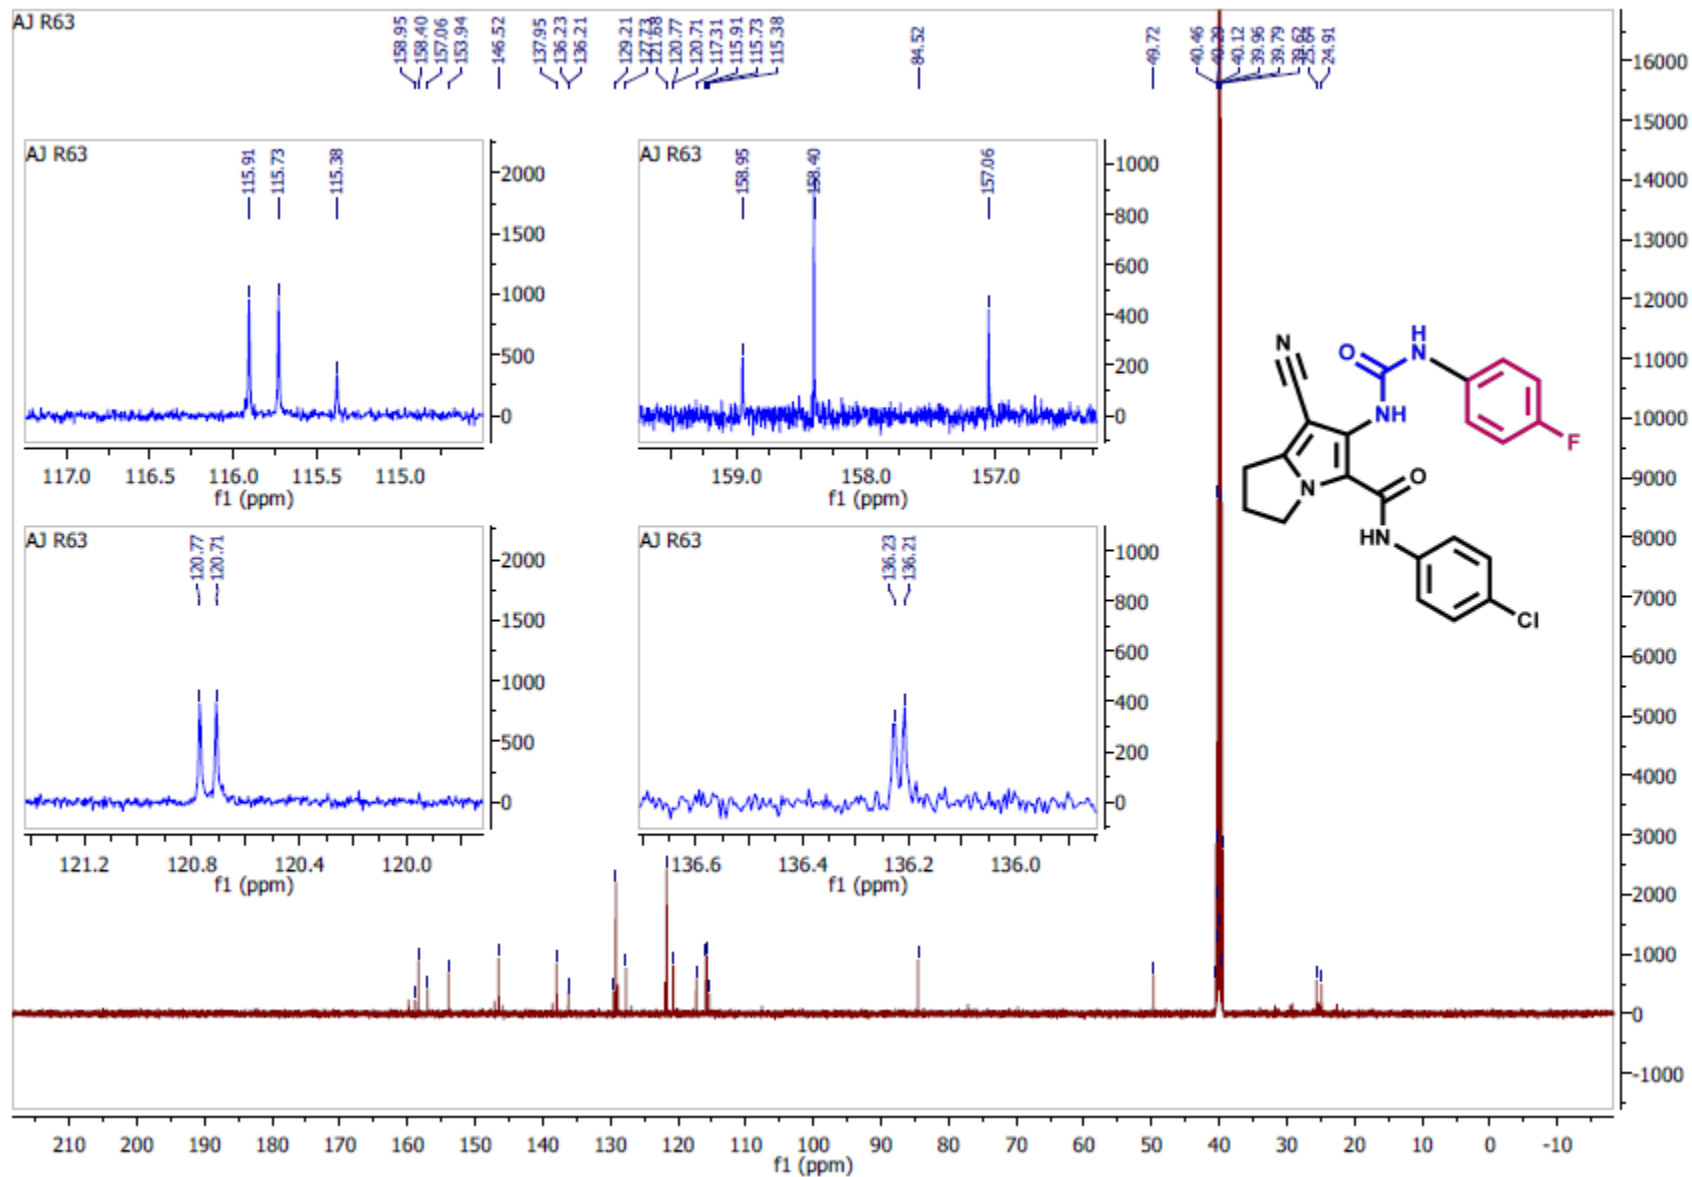

Figure S116. DEPT C<sup>135</sup> (DMSO, 125 MHz,  $\delta$  ppm) of compound **18c**

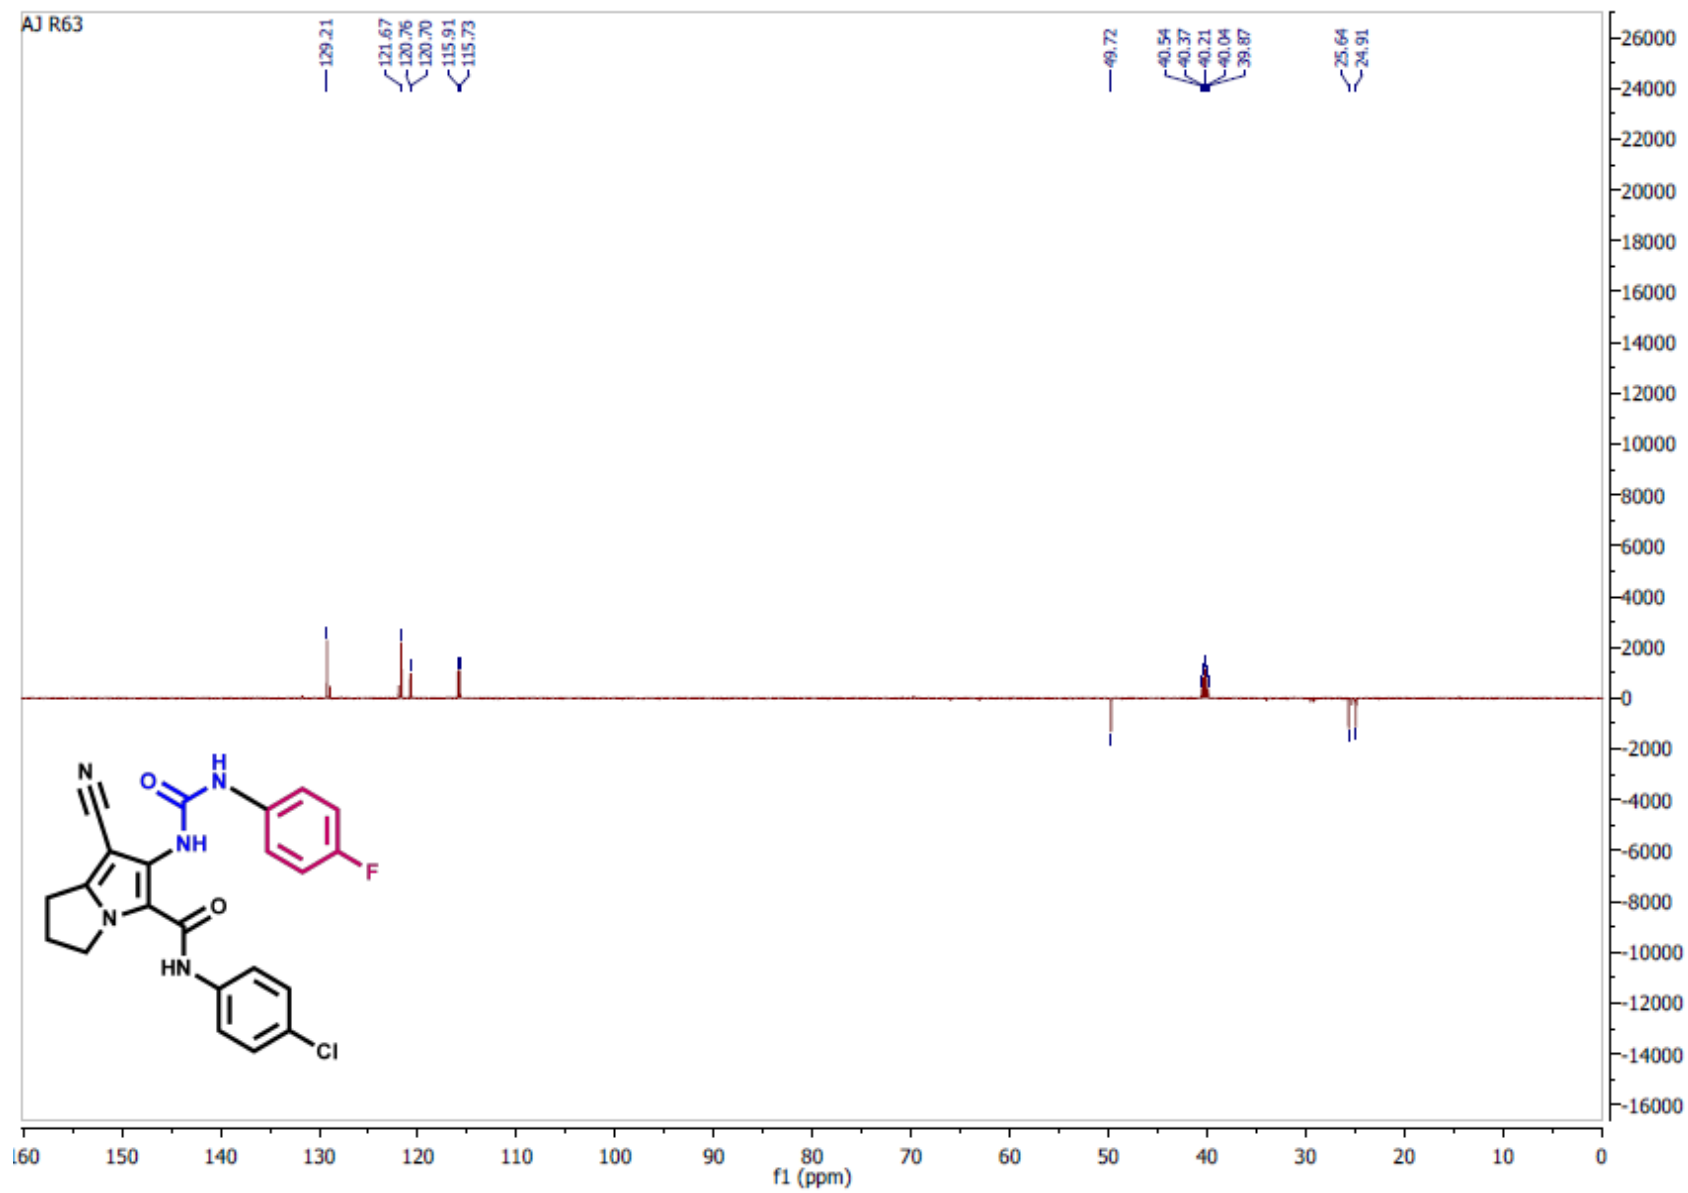

Figure S117. DEPT  $C^{135}$  (DMSO, 125 MHz,  $\delta$  ppm) of compound **18c** (zoom on aromatic C-F Cs)

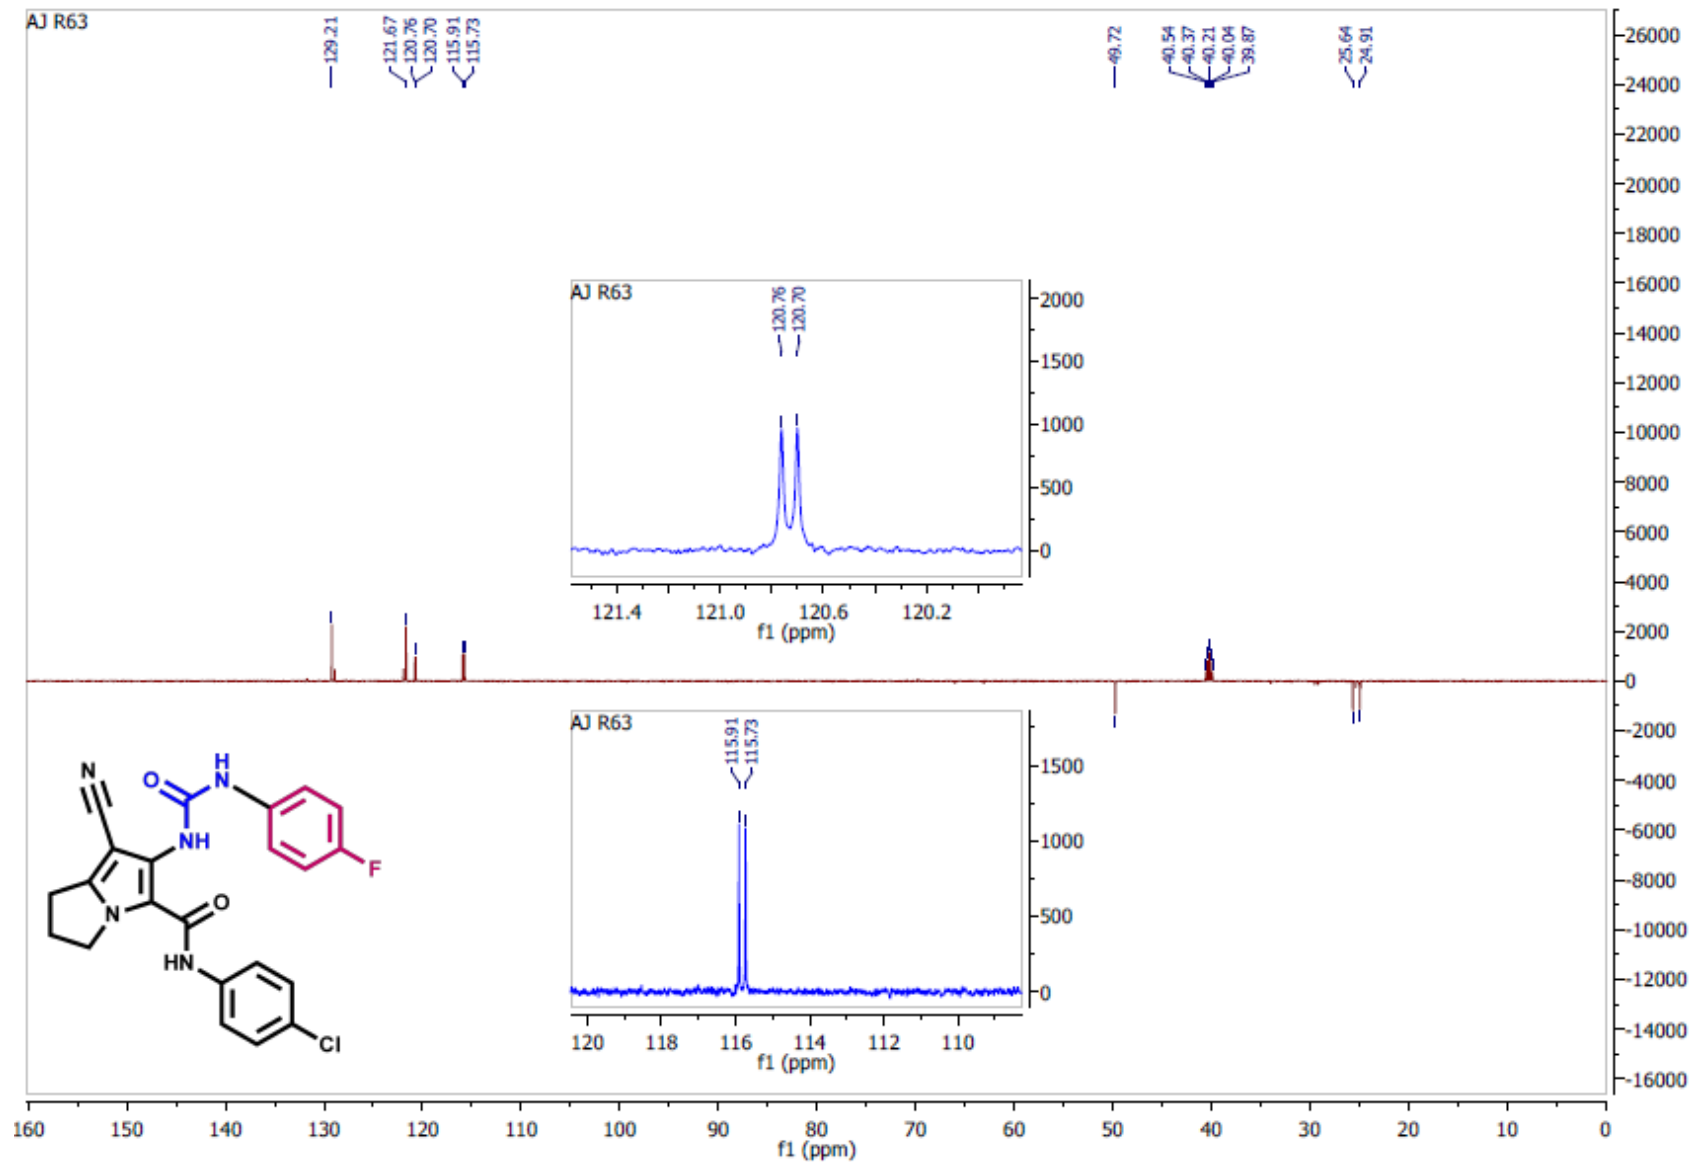

Figure S118. <sup>1</sup>H-NMR (DMSO, 500 MHz, δ ppm) spectrum of compound **19c**

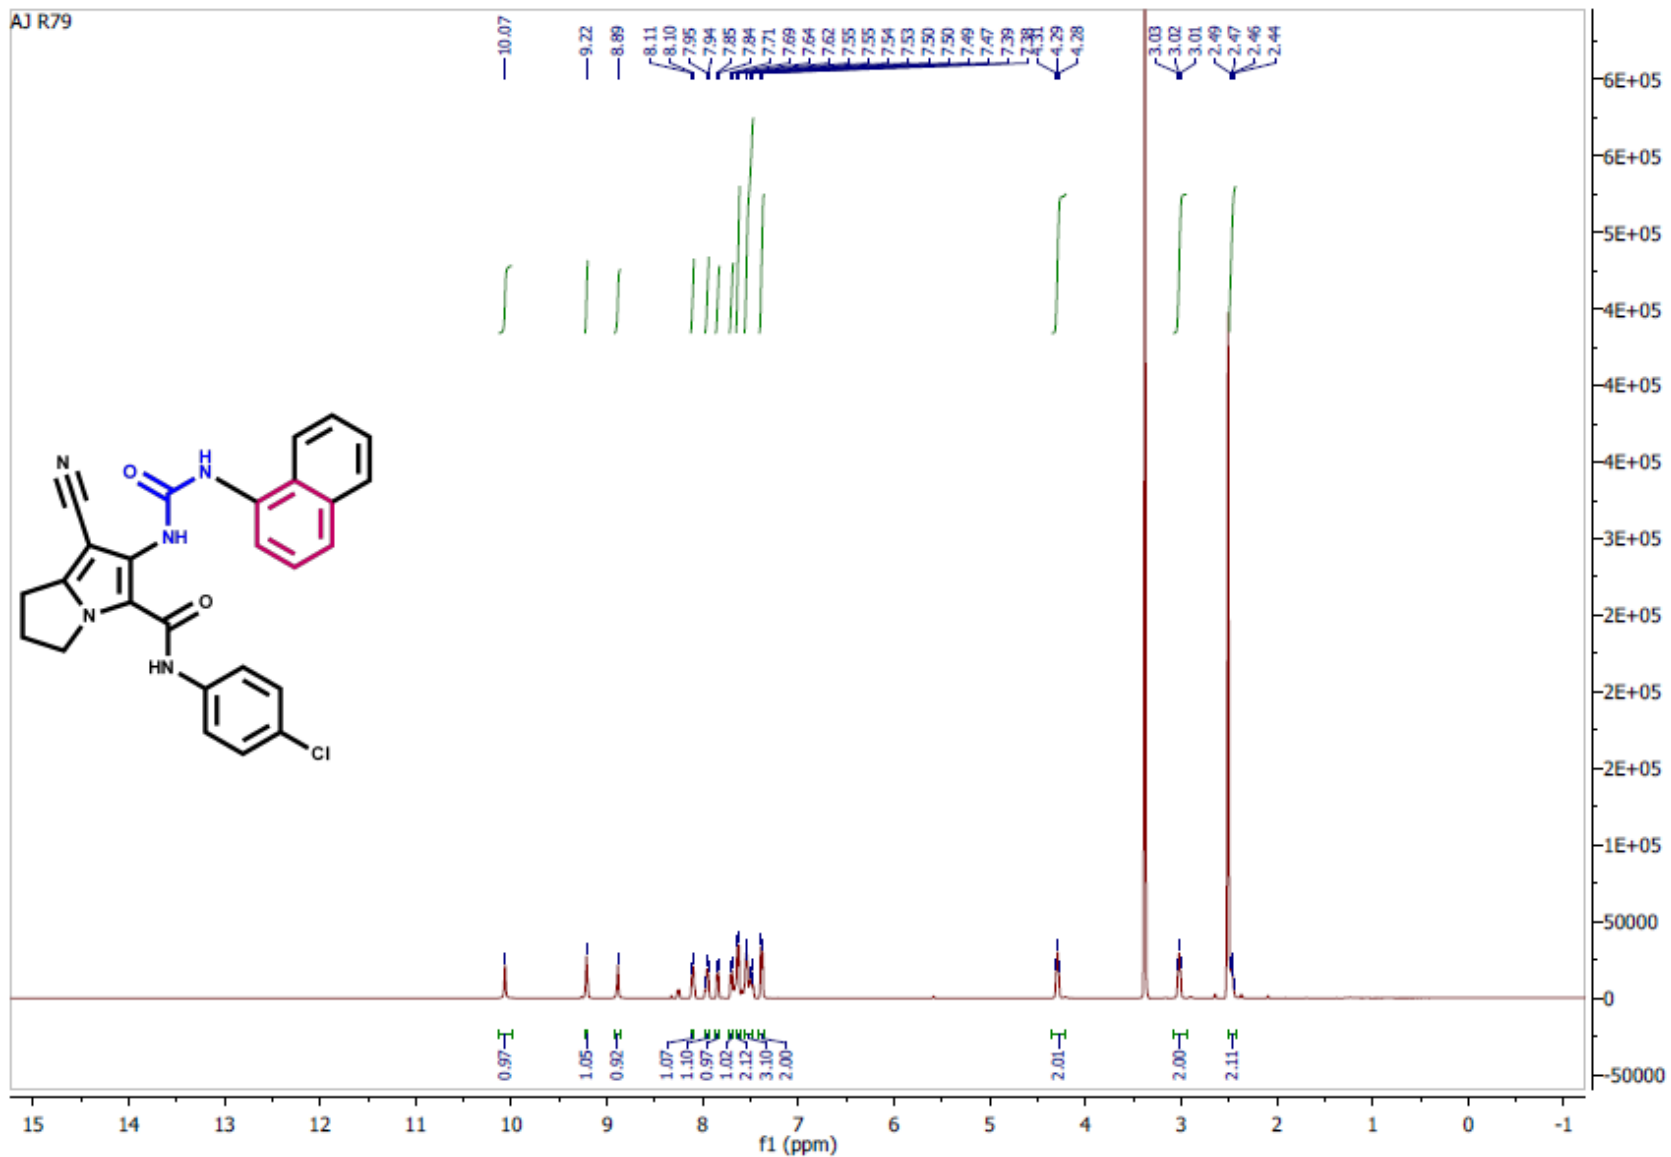



Figure S119. <sup>1</sup>H-NMR (DMSO, 500 MHz, δ ppm) spectrum of compound 19c (zoom on aliphatic Hs)

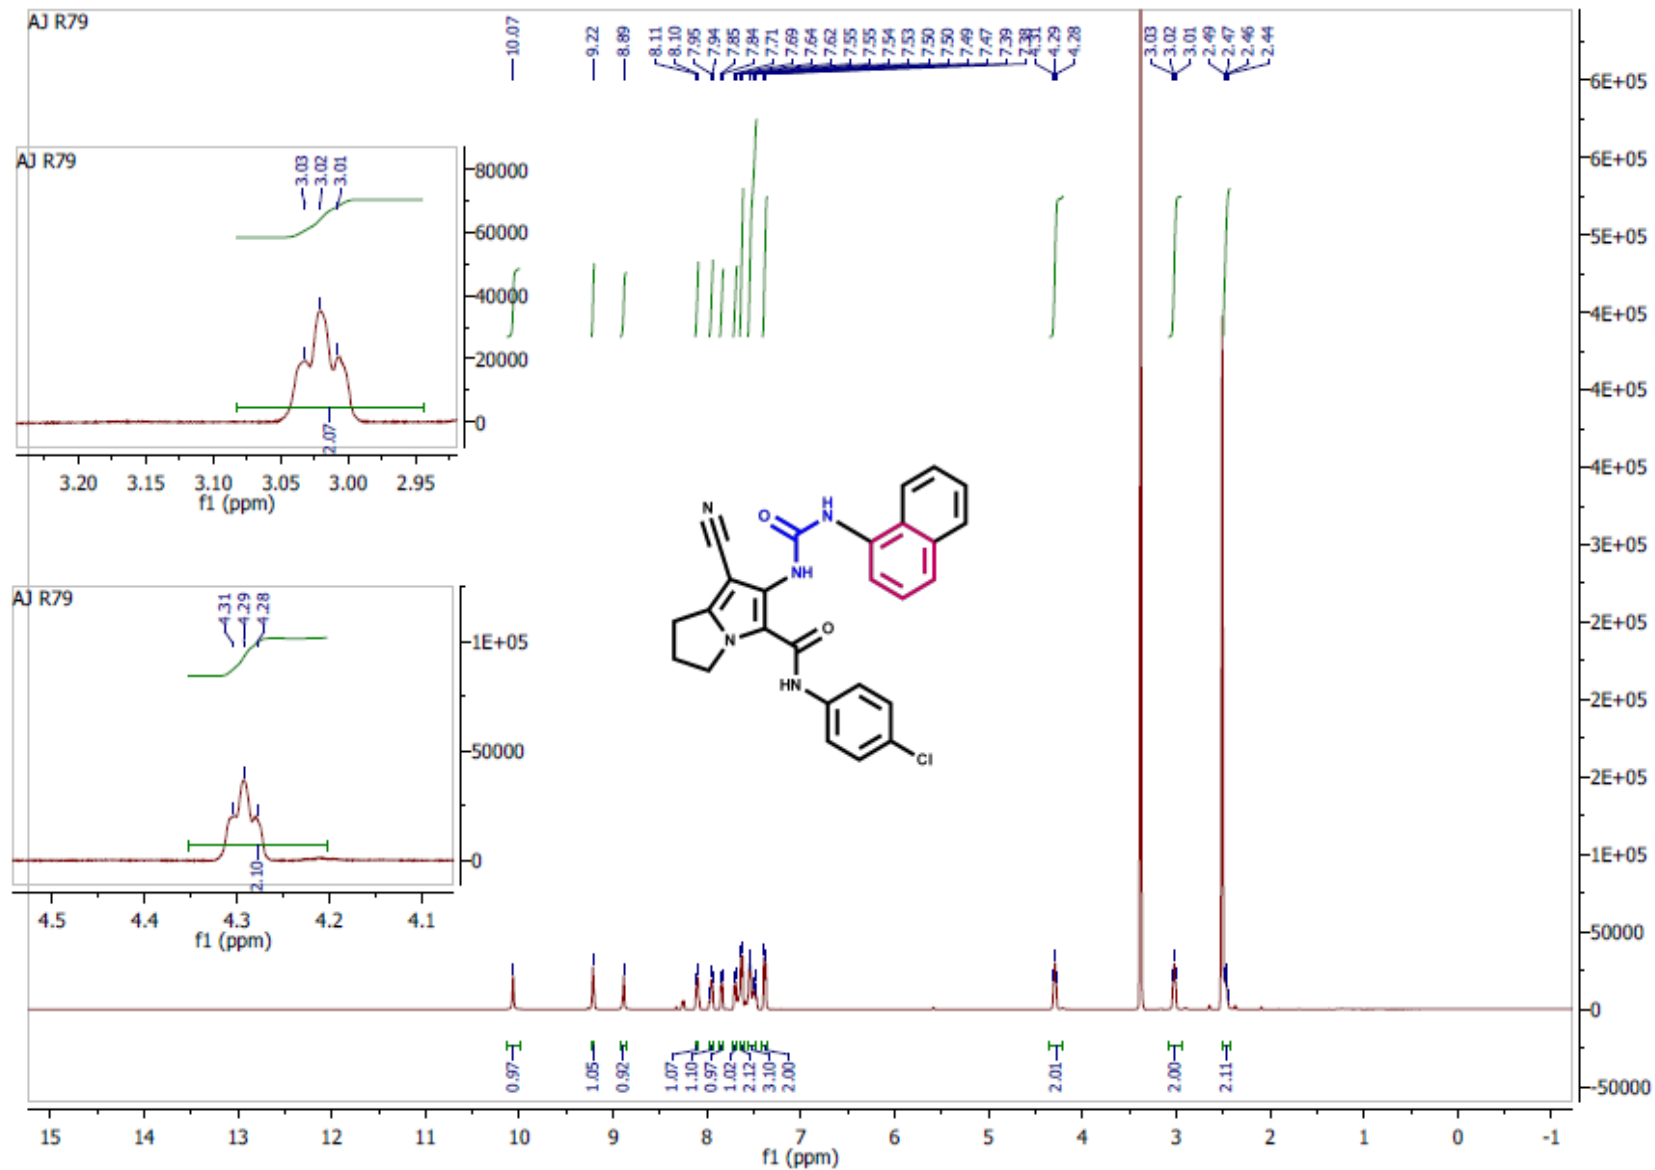

Figure S120. <sup>1</sup>H-NMR (DMSO, 500 MHz, δ ppm) spectrum of compound **19c** (zoom on aromatic Hs)

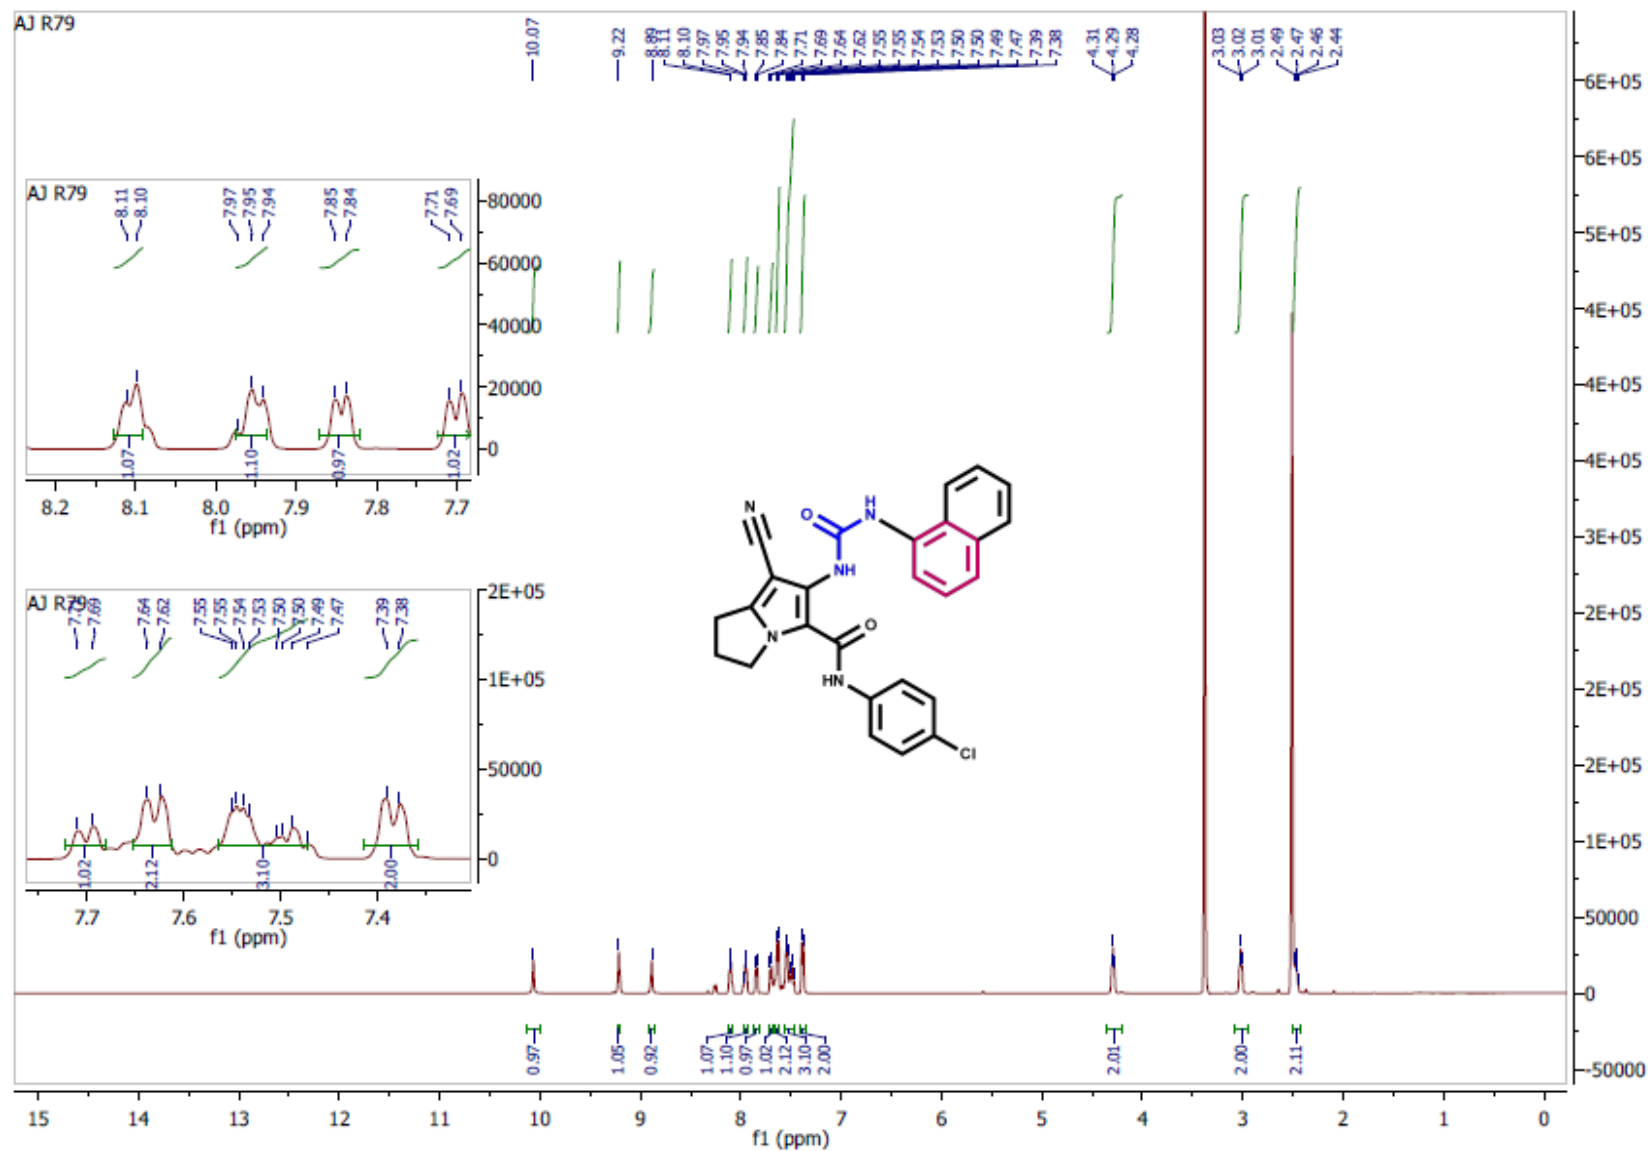

Figure S121.  $^{13}\text{C}$ -NMR (DMSO, 125 MHz,  $\delta$  ppm) spectrum of compound **19c**

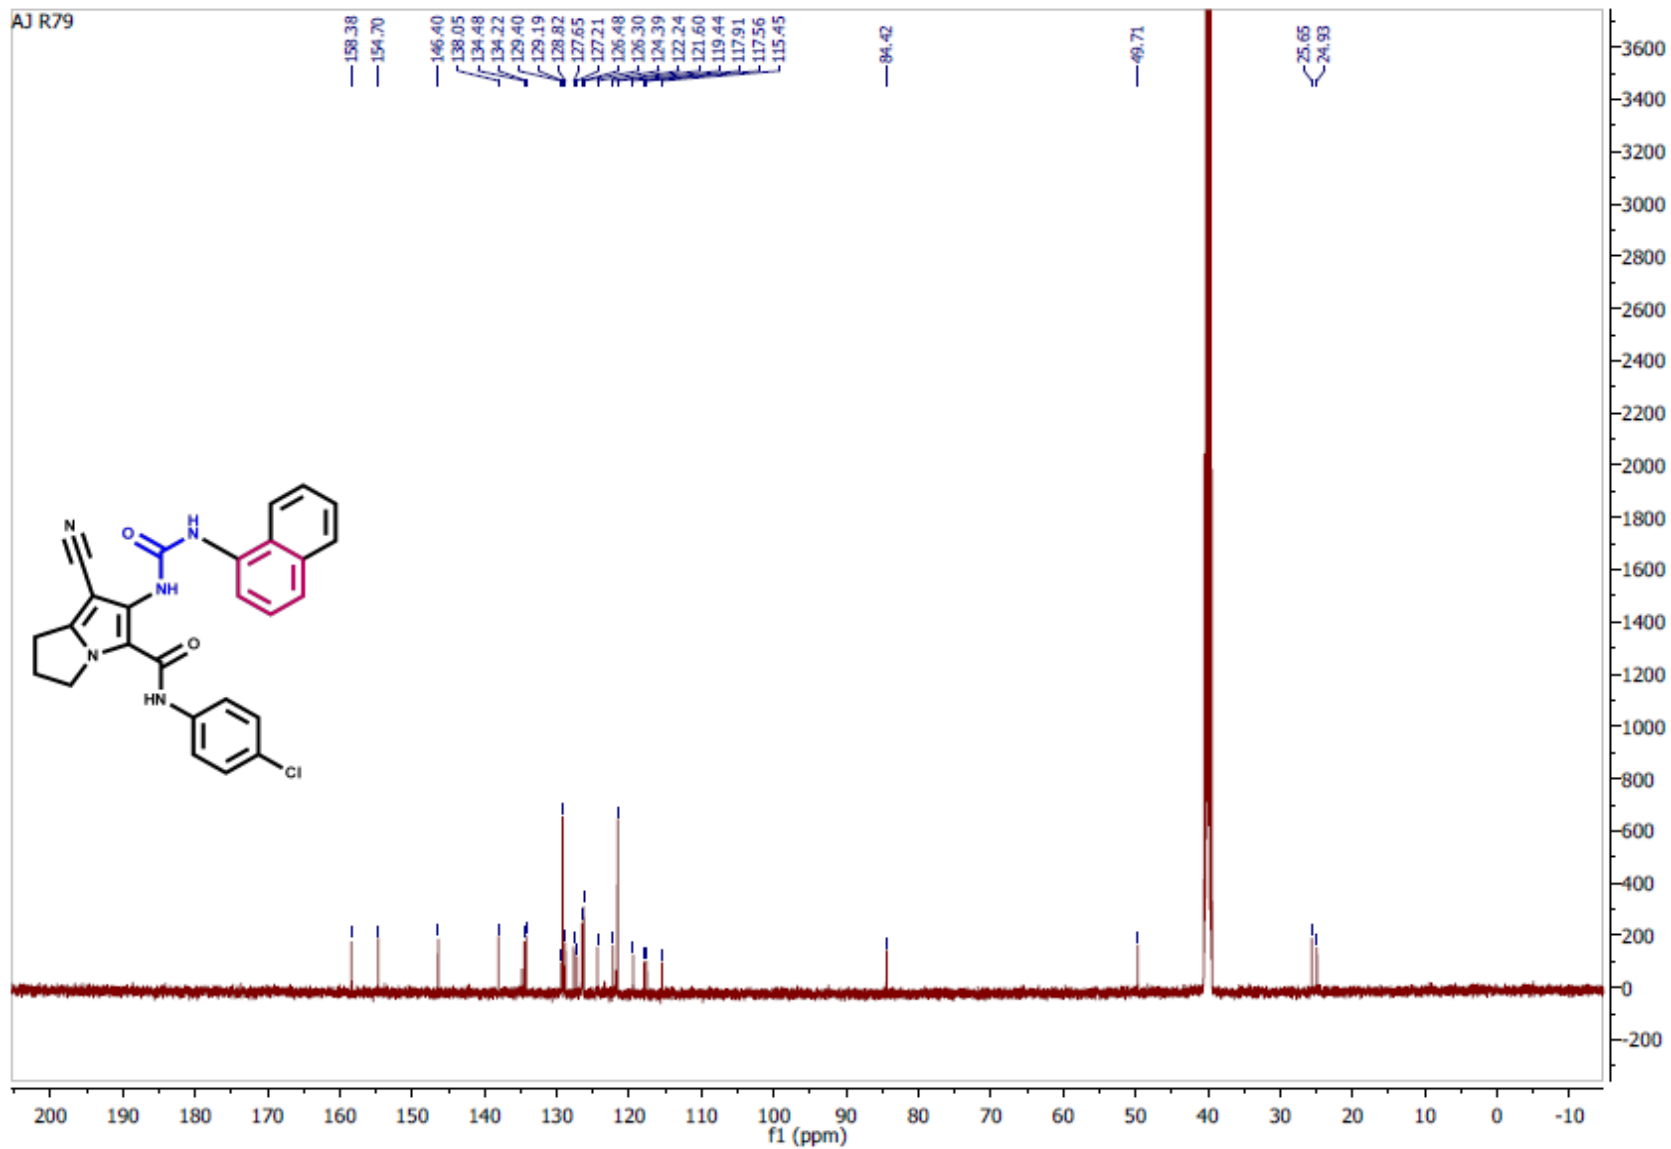

Figure S122. DEPT C<sup>135</sup> (DMSO, 125 MHz,  $\delta$  ppm) of compound **19c**

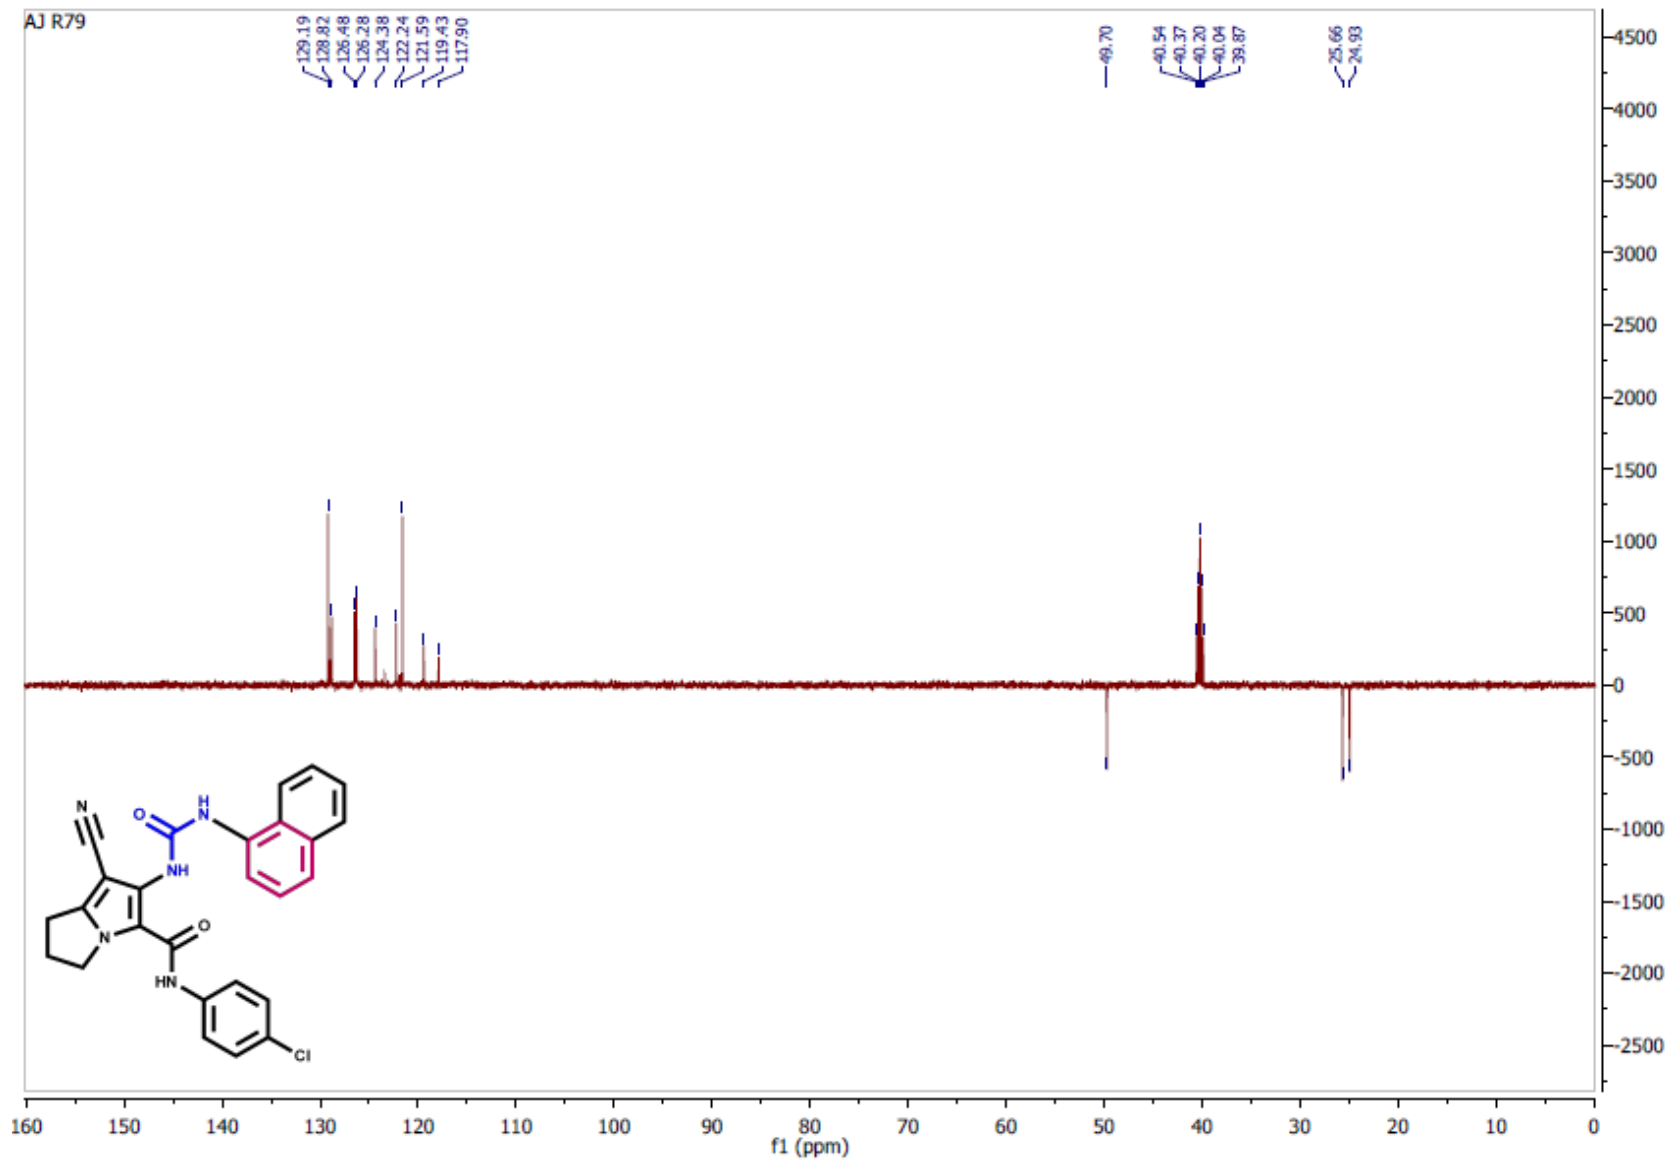

## **Mass Spectra**

Mass spectra were recorded on Shimadzu GCMS QP5050A spectrometer, at 70 eV (EI) at the regional center for mycology and biotechnology, Al-Azhar University.

RT: 0.00 - 4.40 SM: 15G

NL:  
1.33E6  
TIC MS  
ahmed-  
nahmoud-  
1s

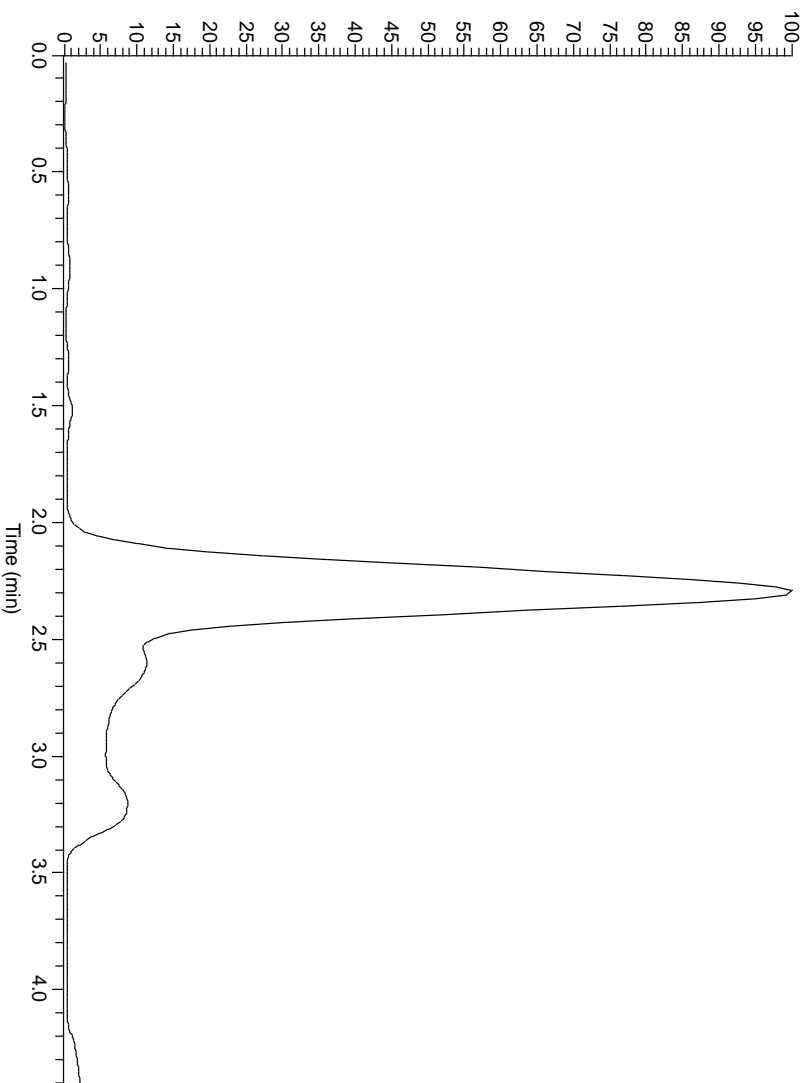

ahmed-nahmoud-1s #135 RT: 2.28 AV: 1 SB: 2 4.40 , 4.40 NL: 3.90E5  
T: (0,0) + c EI Full ms [40.00-1000.00]

Figure S123. Mass spectrum of compound 16a

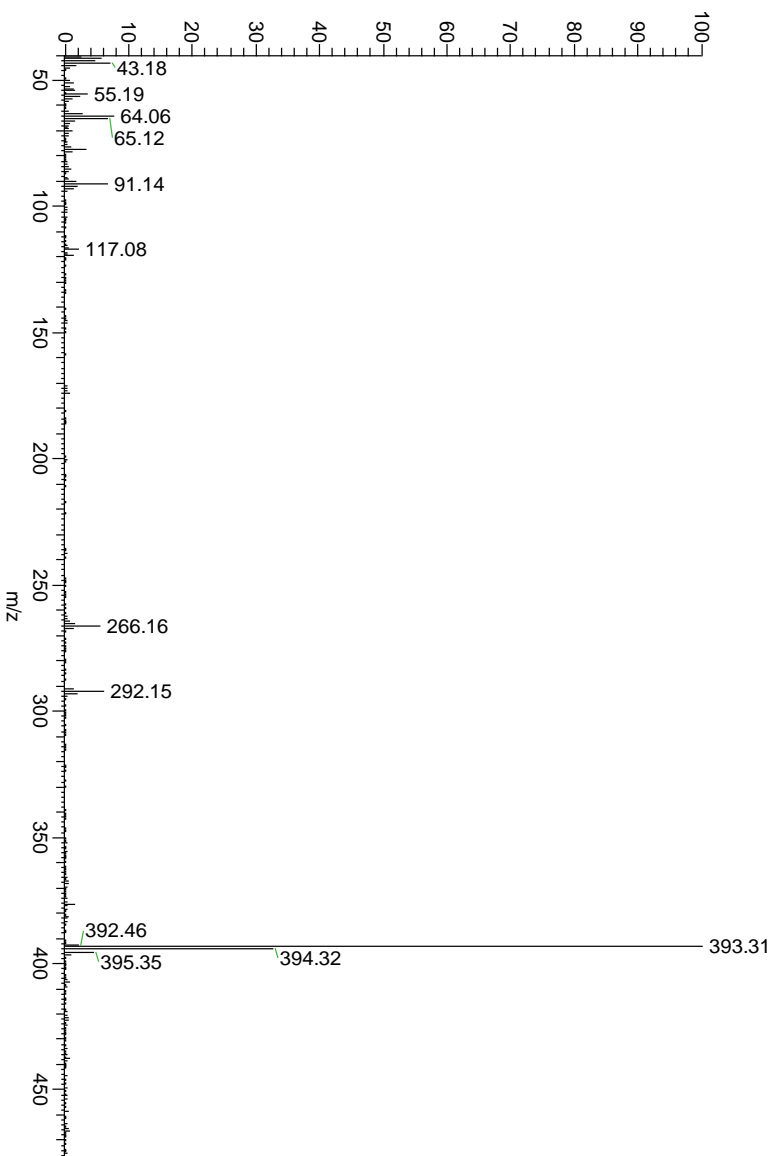

**Figure S124. Mass spectrum of compound 16b**

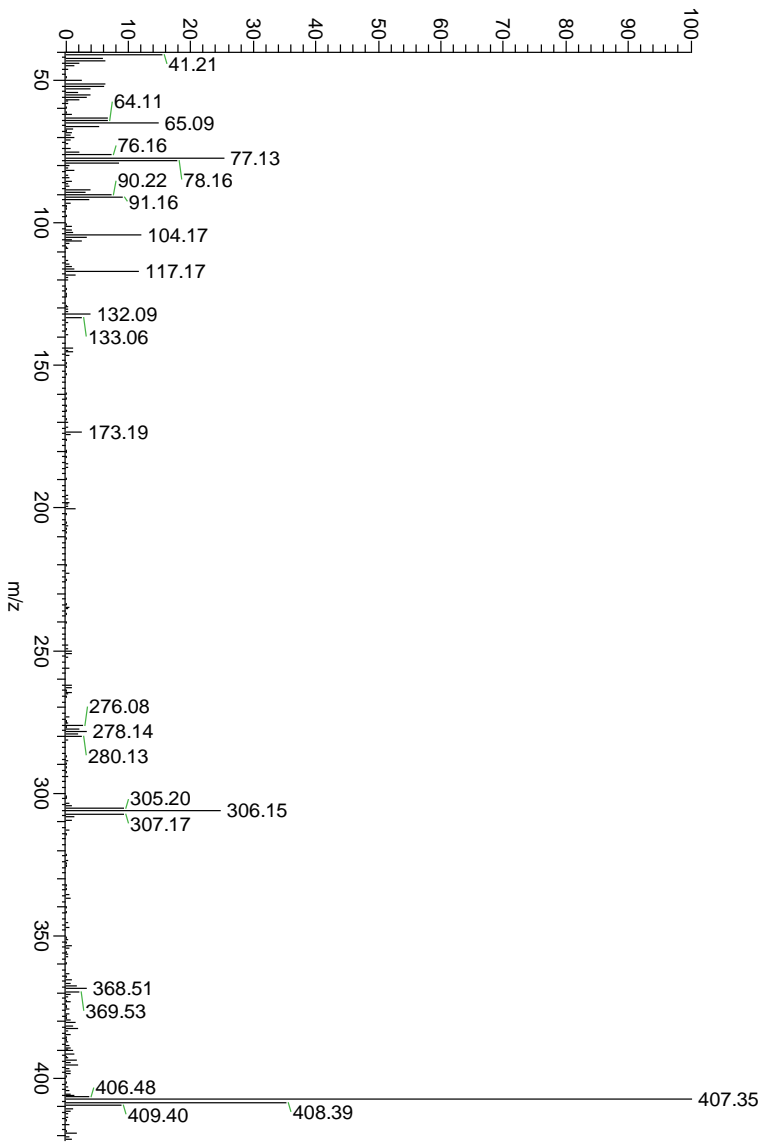

ahmed-mahmoud-2s #154 RT: 2.59 AV: 1 SB: 2 4.55, 4.59 NL: 1.07E5  
T: (0.0) + c EI Full ms [40.00-1000.00]

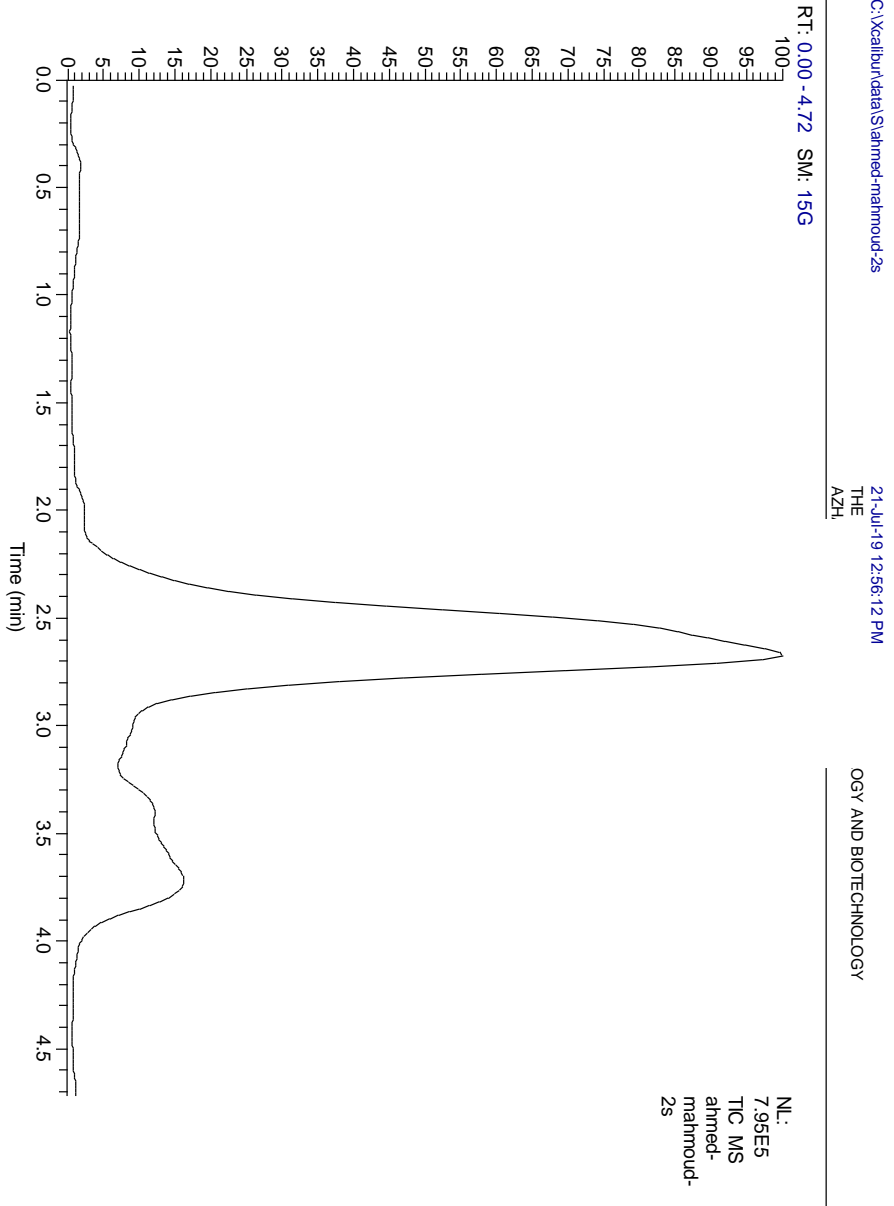

RT: 0.00 - 4.49 SM: 15G

NL:  
9.98E5  
TIC MS  
ahmed-  
mahmoud-  
3s

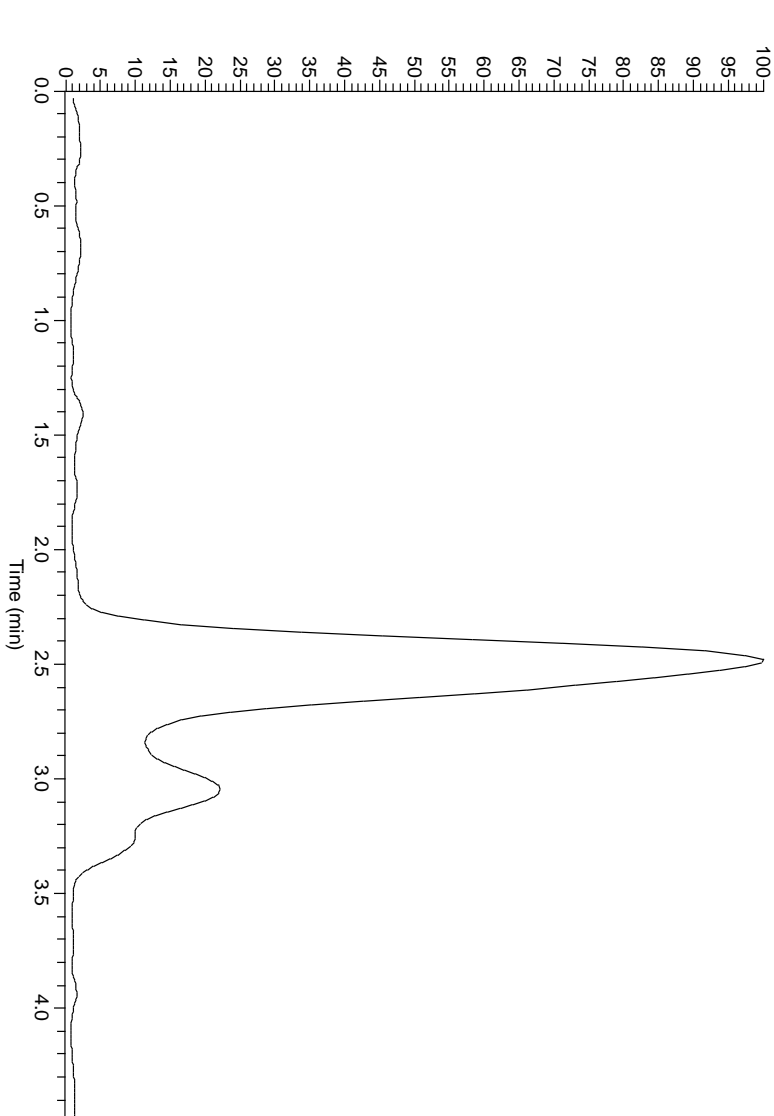

ahmed-mahmoud-3s #148 RT: 2.49 AV: 1 SB: 2.449, 4.49 NL: 2.39E5  
T: (0.0) + c EI Full ms [40.00-1000.00]

Figure S125. Mass spectrum of compound 16c

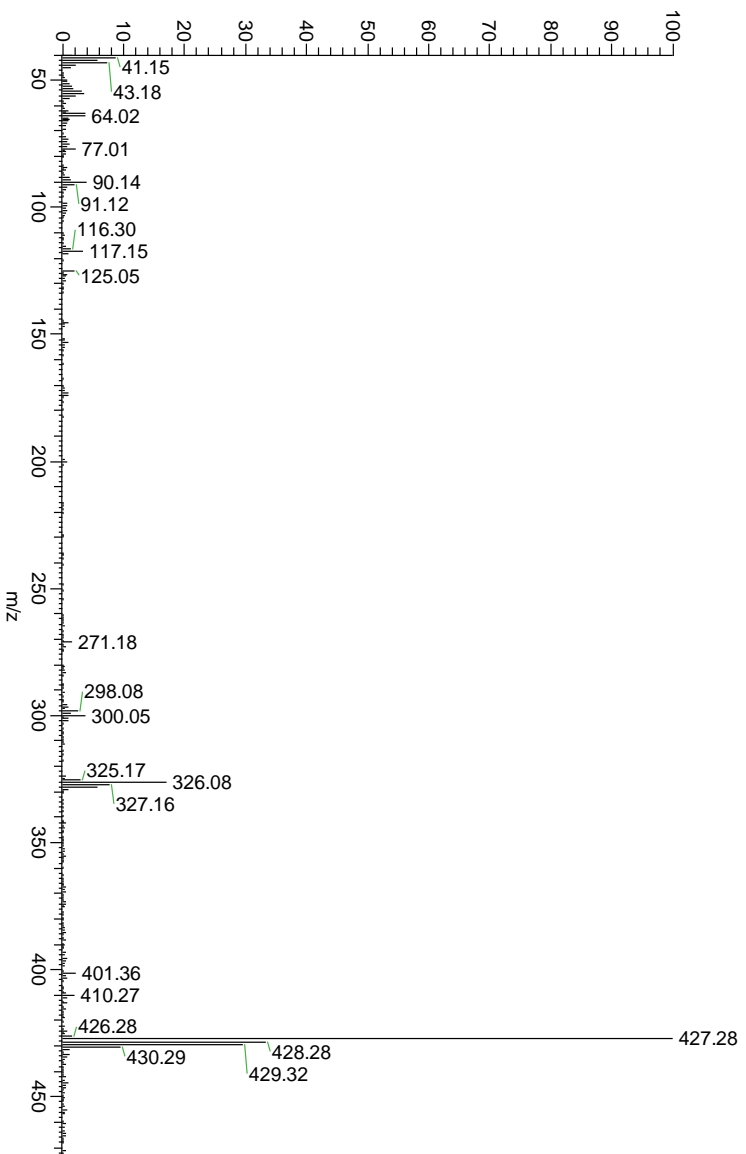



RT: 0.00 - 4.49 SM: 15G

NL:  
1.27E6  
TIC MS  
ahmed-  
mahmoud-  
4s

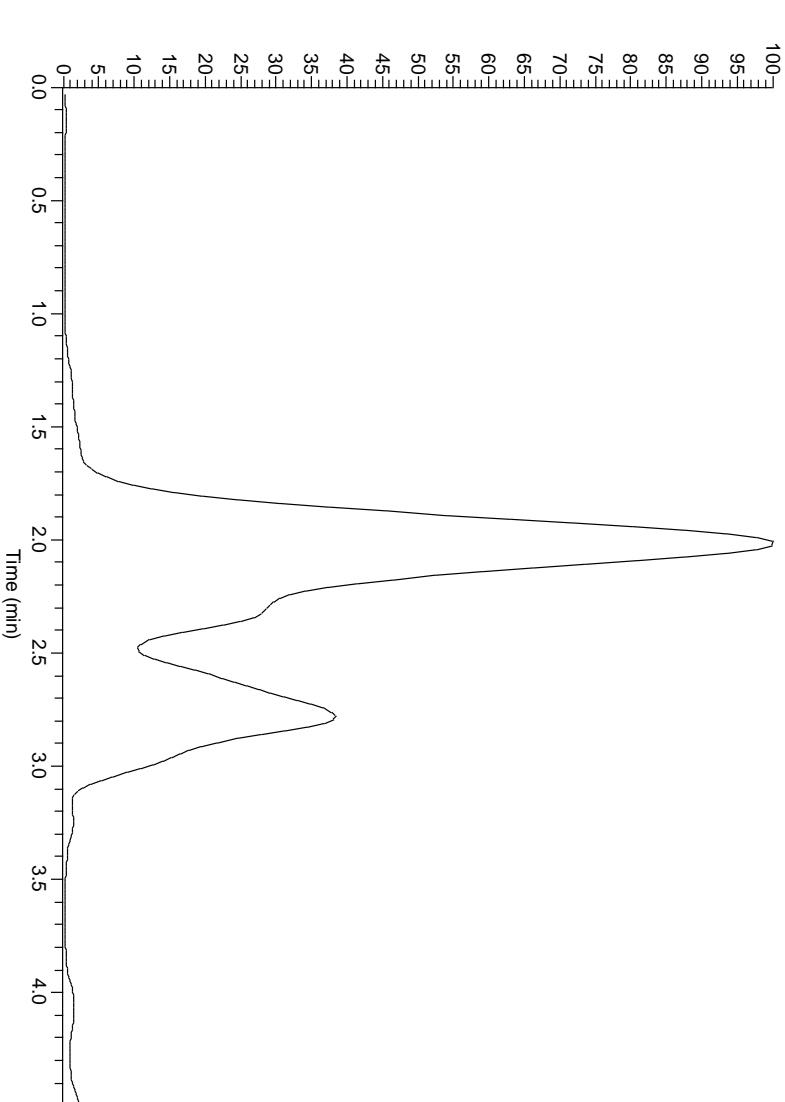

ahmed-mahmoud-4s #165 RT: 2.78 AV: 1 SB: 2 4.49 , 4.49 NL: 5.53E4  
T: (0.0) + c EI Full ms [40.00-1000.00]

Figure S126. Mass spectrum of compound 17a

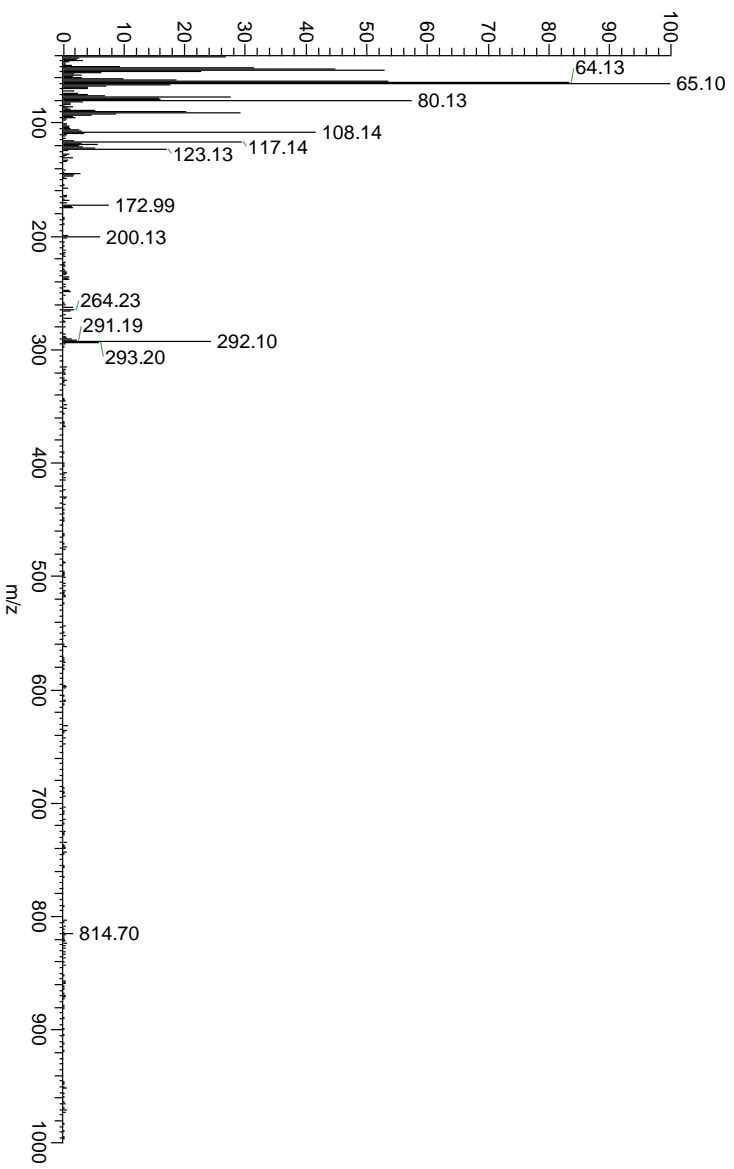

Figure S127. Mass spectrum of compound 17b

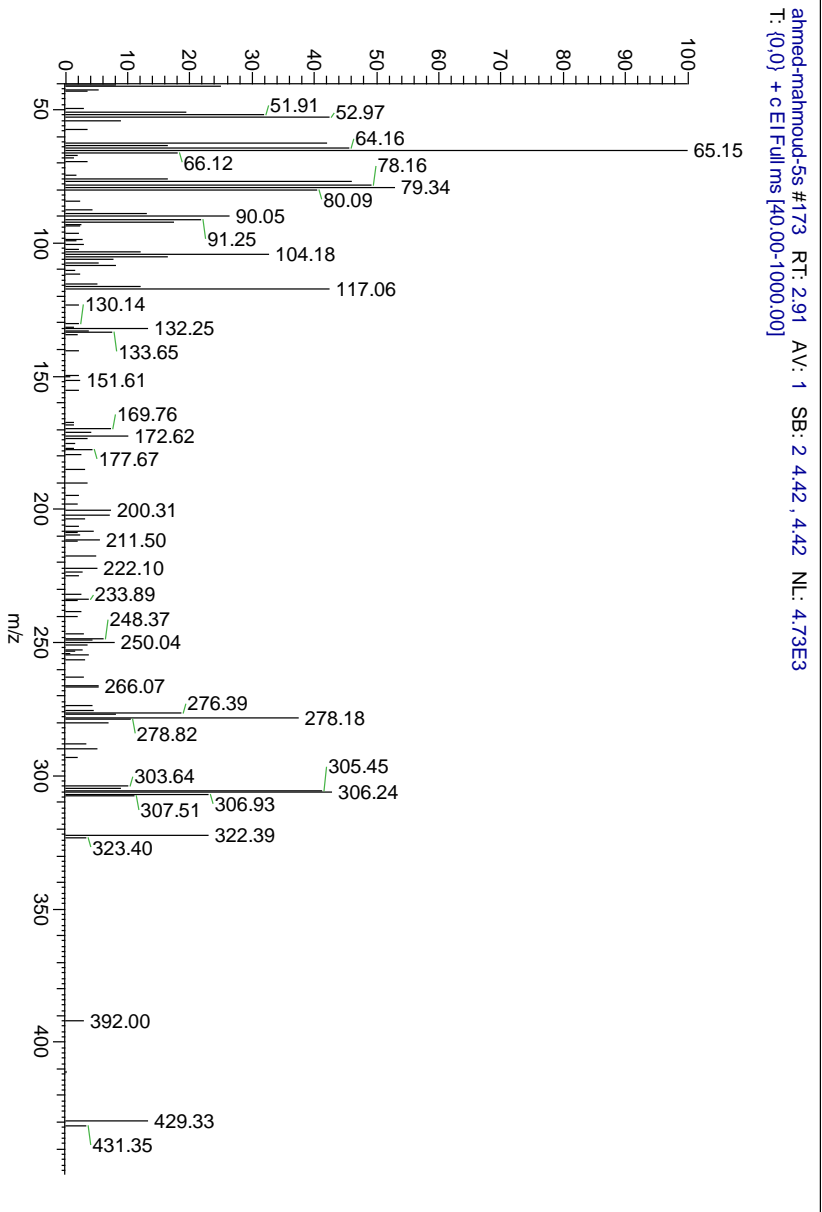

ahmed-mahmoud-5s #173 RT: 2.91 AV: 1 SB: 2 4.42, 4.42 NL: 4.73E3  
T: (0.0) + c EI Full ms [40.00-1000.00]

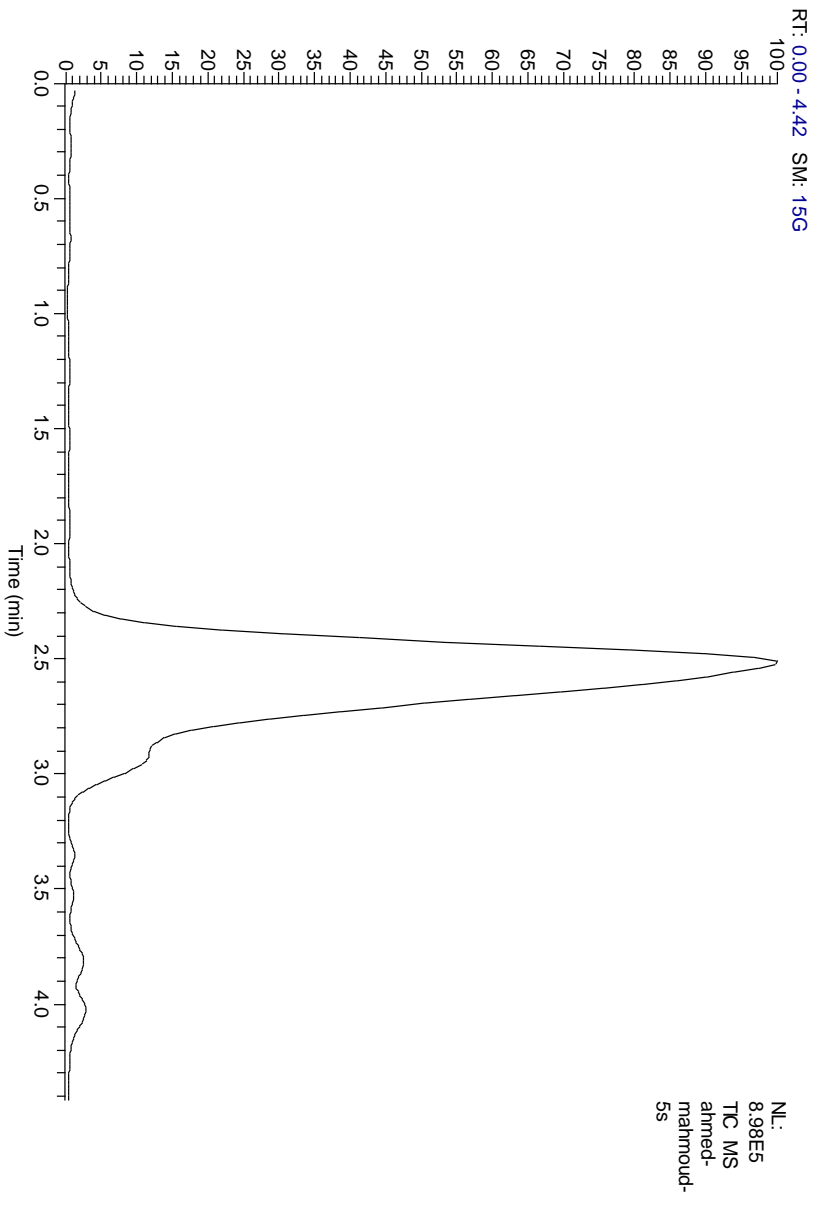

C:\Xcalibur\data\ahmed-mahmoud-5s

21-Jul-19 1:12:36 PM  
THE  
AZH

OGY AND BIOTECHNOLOGY

NL:  
8.98E5  
TIC MS  
ahmed-  
mahmoud-  
5s

Figure S128. Mass spectrum of compound 17c

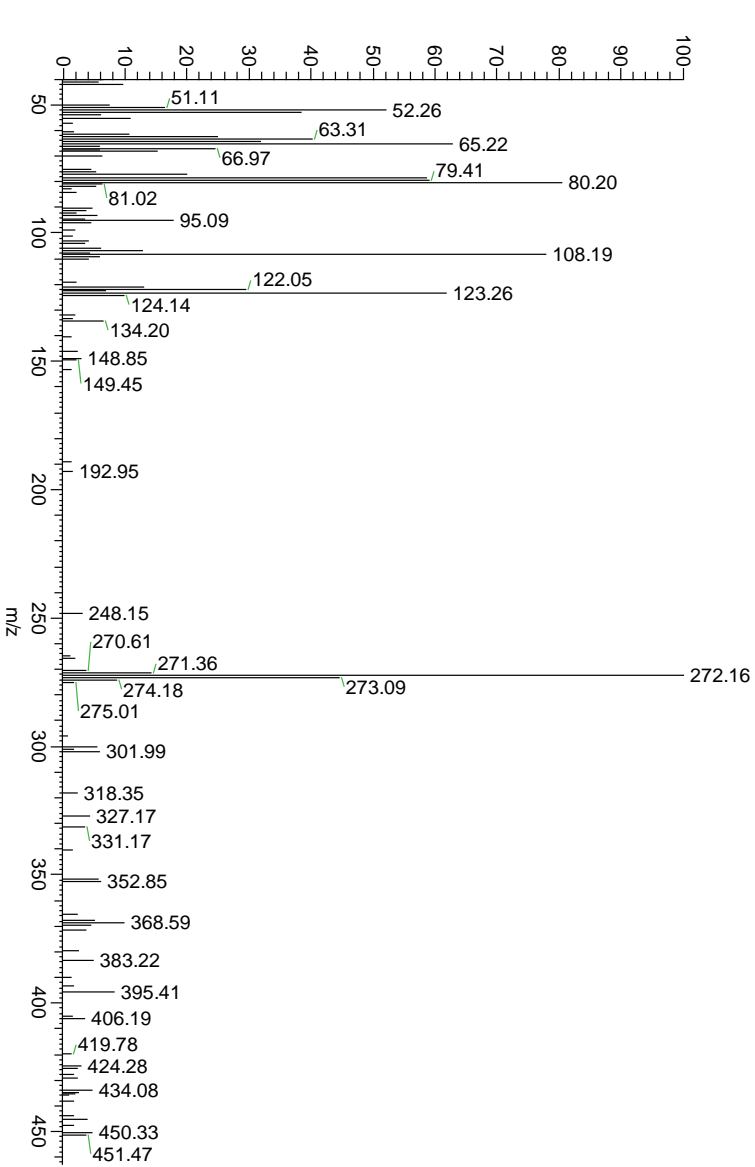

ahmed-mahmoud-6s #127 RT: 2.14 AV: 1 SB: 2 4.47, 4.47 NL: 9.20E3  
T: (0.0) + c EI Full ms [40.00-1000.00]

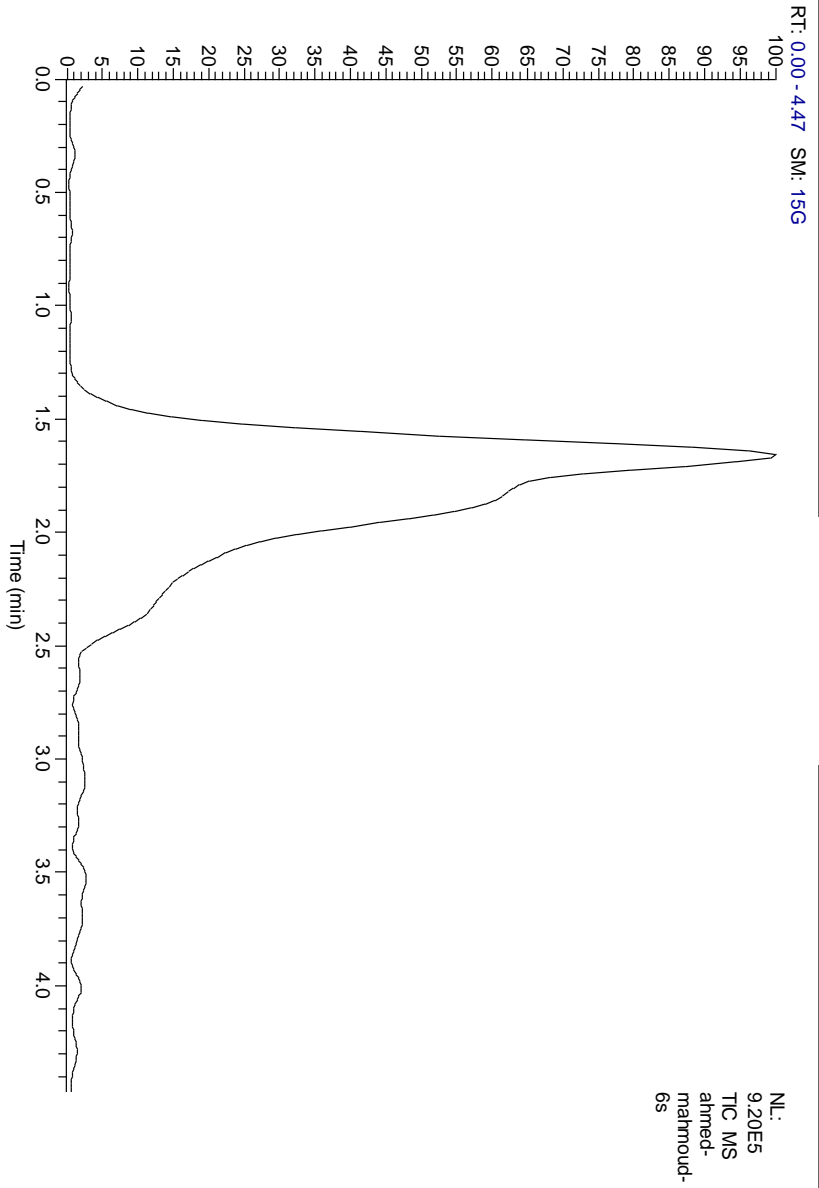

Figure S129. Mass spectrum of compound 18a

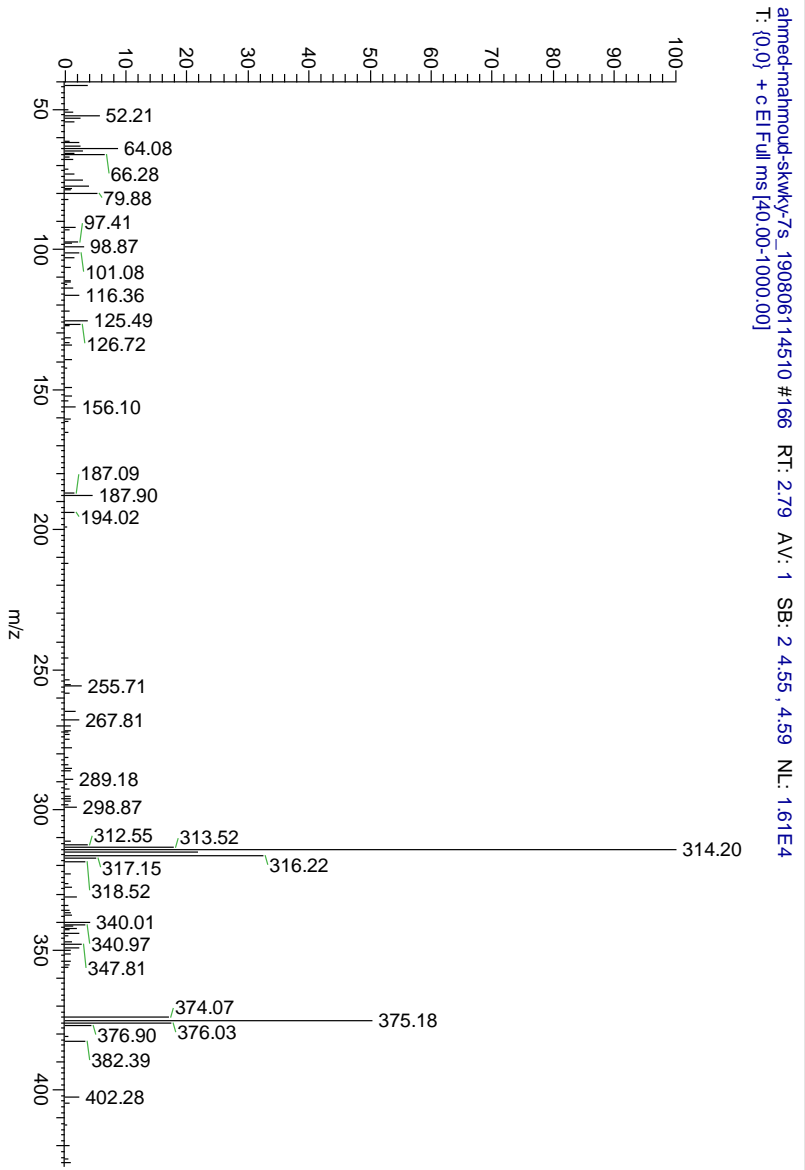

ahmed-mahmoud-skwy-7s\_190806114510 #166 RT: 2.79 AV: 1 SB: 2 4.55, 4.59 NL: 1.61E4  
T: {0.0} + c EI Full ms [40.00-1000.00]

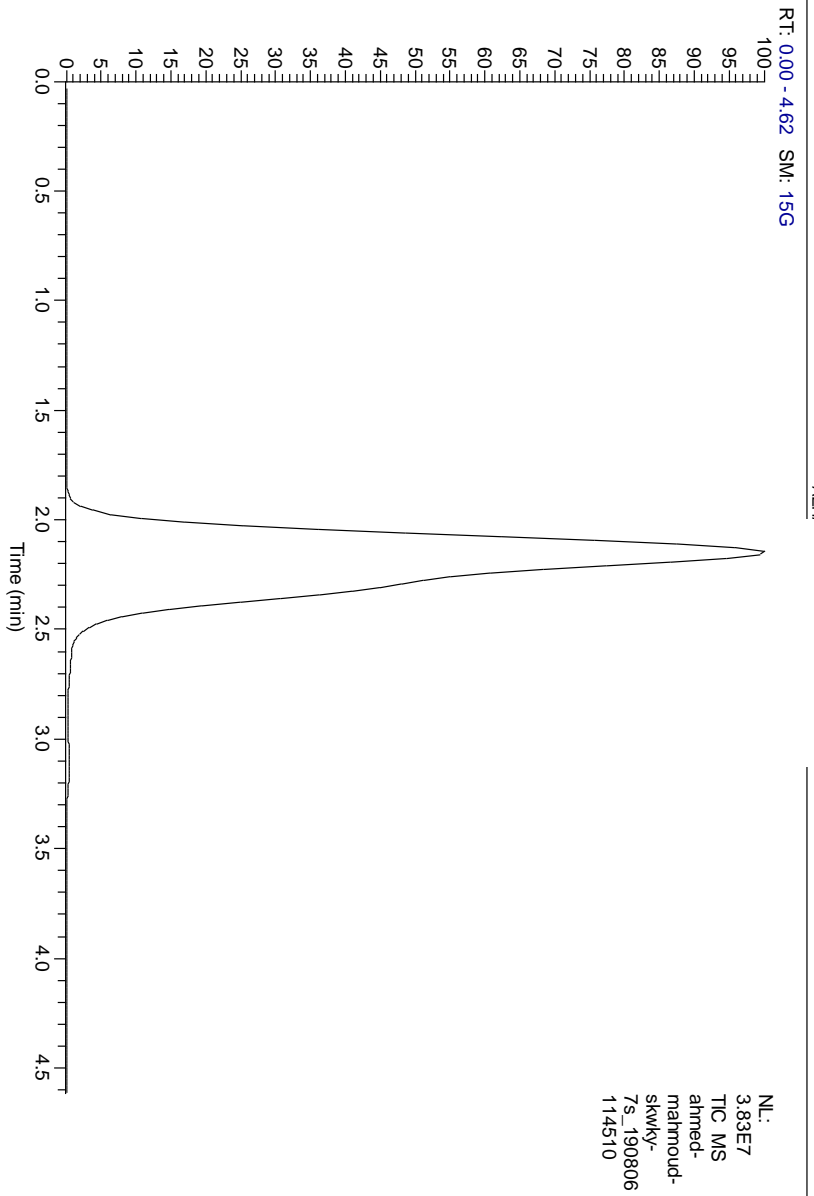

RT: 0.00 - 4.62 SM: 15G

ahmed-mahmoud-skwy-7s\_190806114510  
06-Aug-19 11:45:10 AM  
THE  
AZH

OGY AND BIOTECHNOLOGY

NL:  
3.83E7  
TIC MS  
ahmed-  
mahmoud-  
skwy-  
7s\_190806  
114510

Figure S130. Mass spectrum of compound 18b

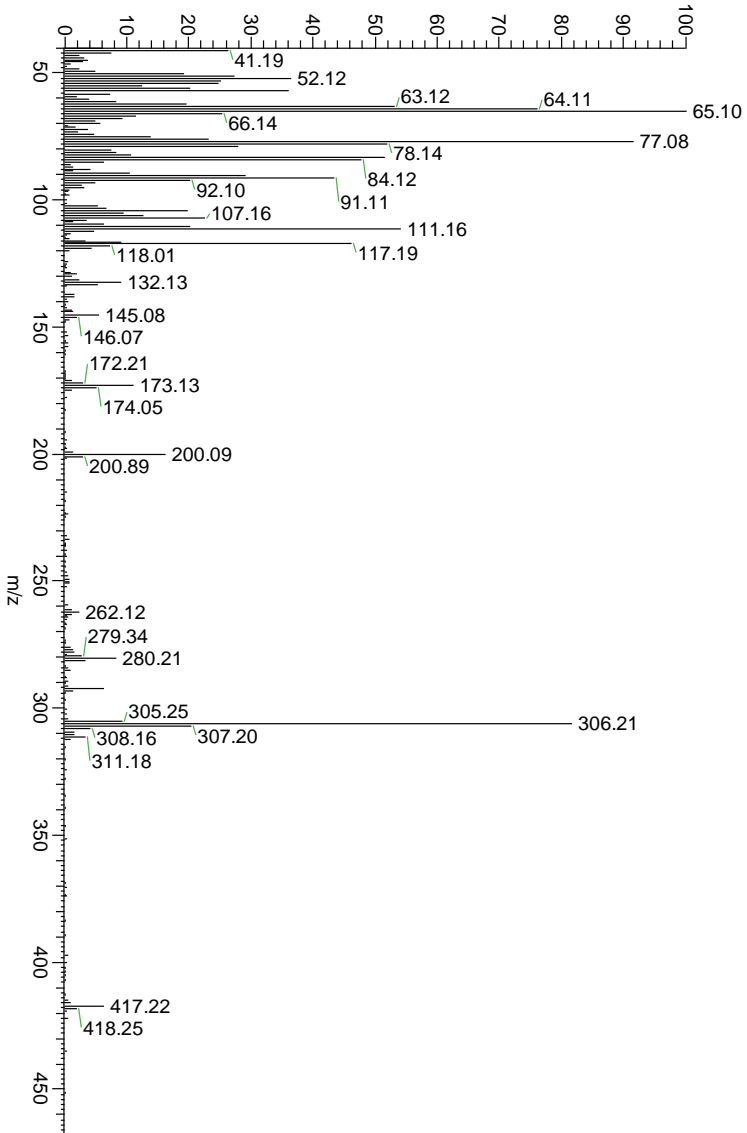

ahmed-mahmoud-skwky-8s #183 RT: 3.08 AV: 1 SB: 2 4.49 4.49 NL: 1.16E5  
T: (0.0) + c EI Full ms (40.00-1000.00)

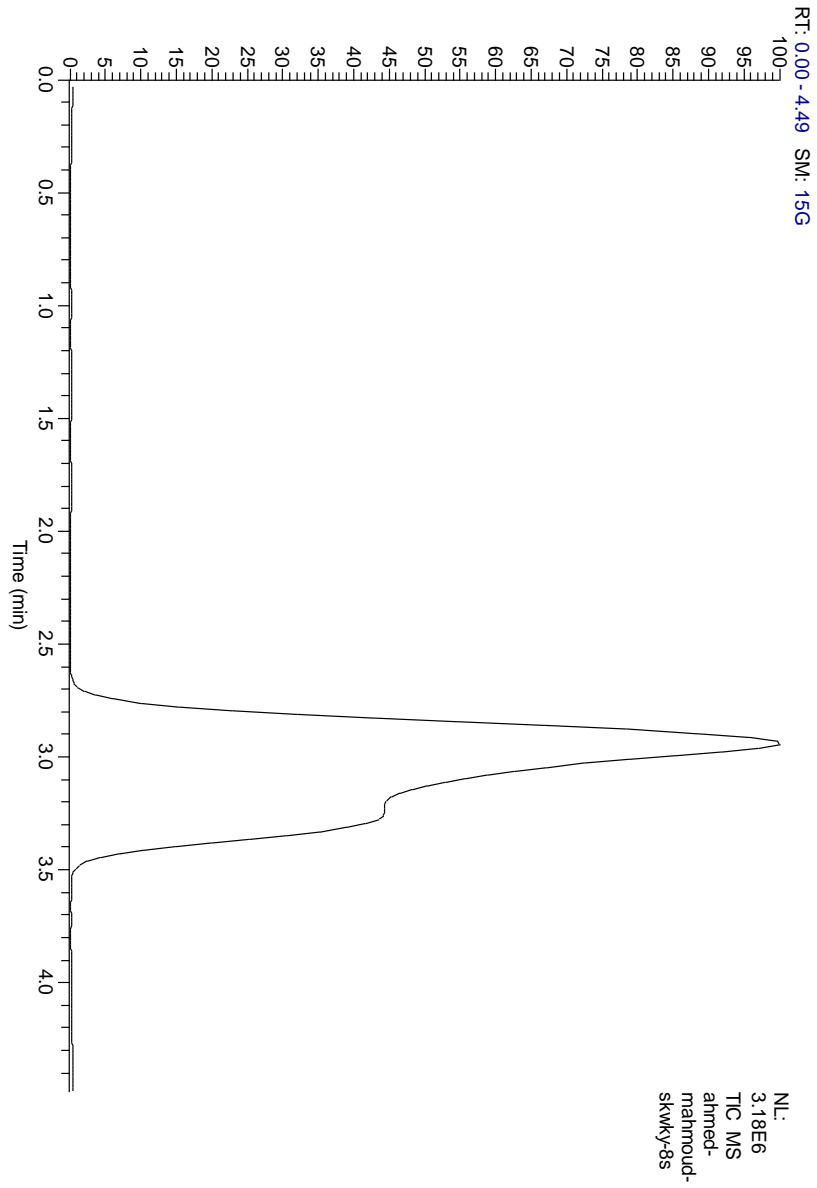

Figure S131. Mass spectrum of compound 18c

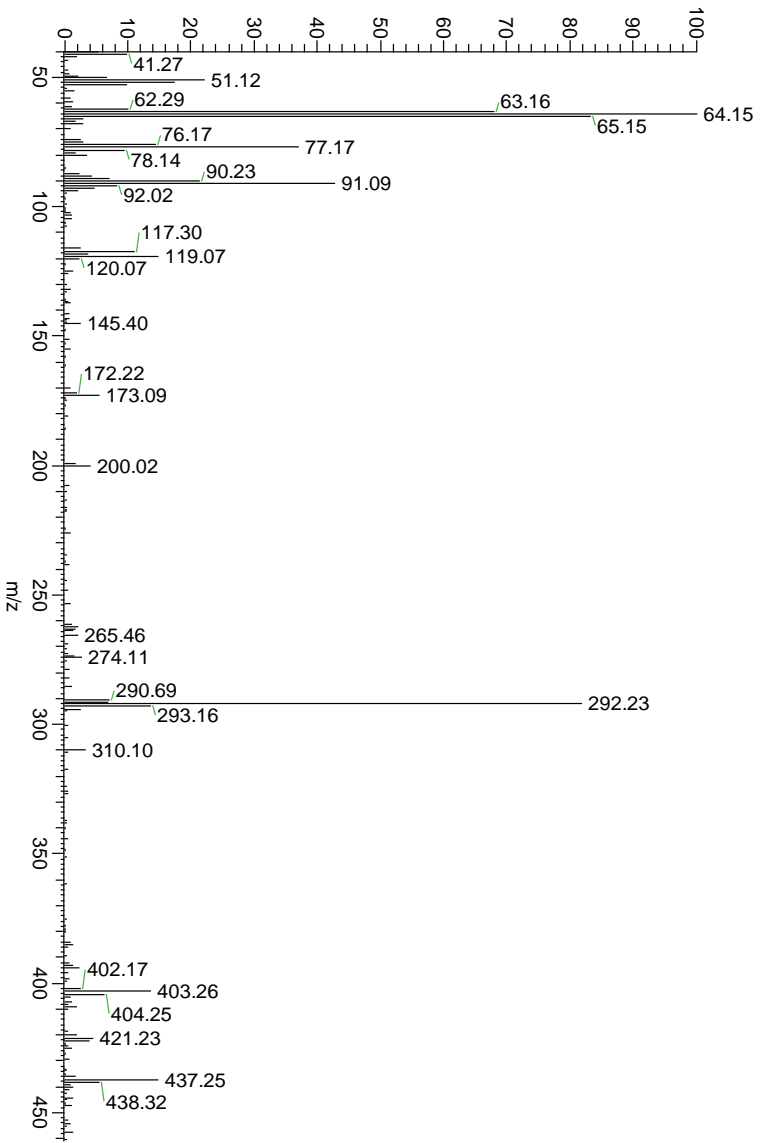

ahmed-mahmoud-skwy-9s #144 RT: 2.43 AV: 1 SB: 2 4.52 4.52 NL: 5.54E4  
T: (0.0) + c EI Full ms [40.00-1000.00]

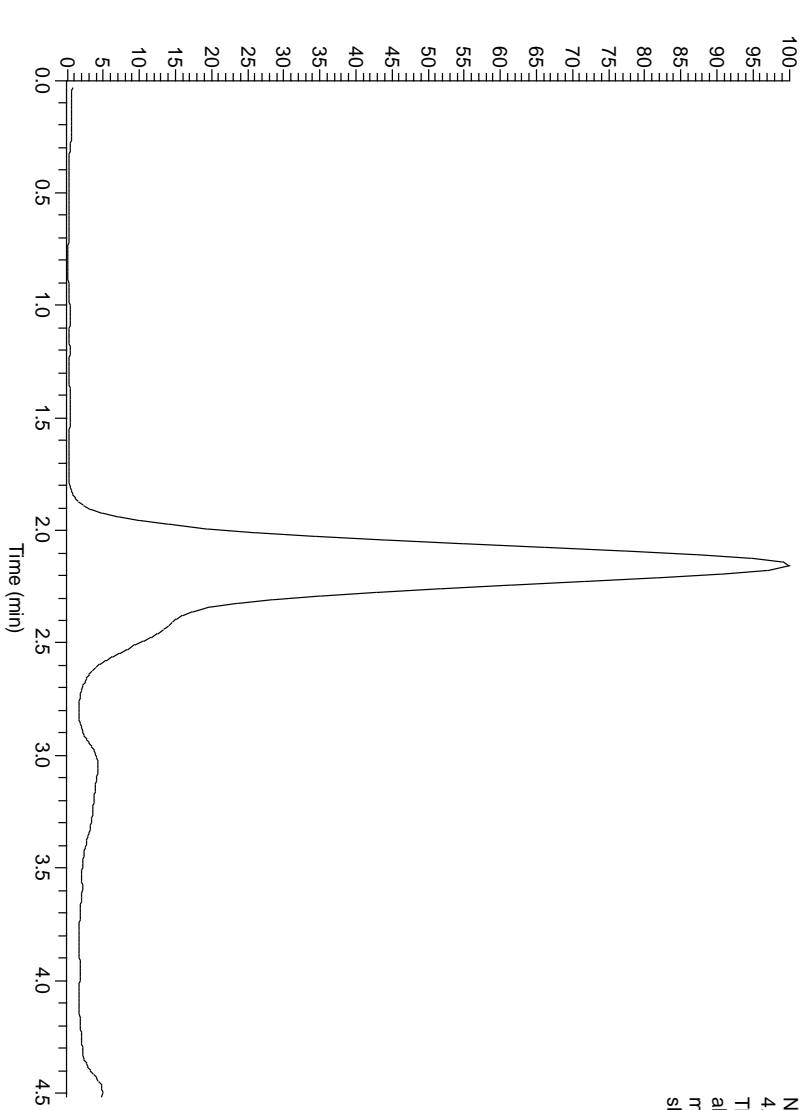

C:\Xcalibur\... \Ahmed-mahmoud-skwy-9s

04-Aug-19 1:19:51 PM  
THE  
AZH

OGY AND BIOTECHNOLOGY

**Figure S132. Mass spectrum of compound 19a**

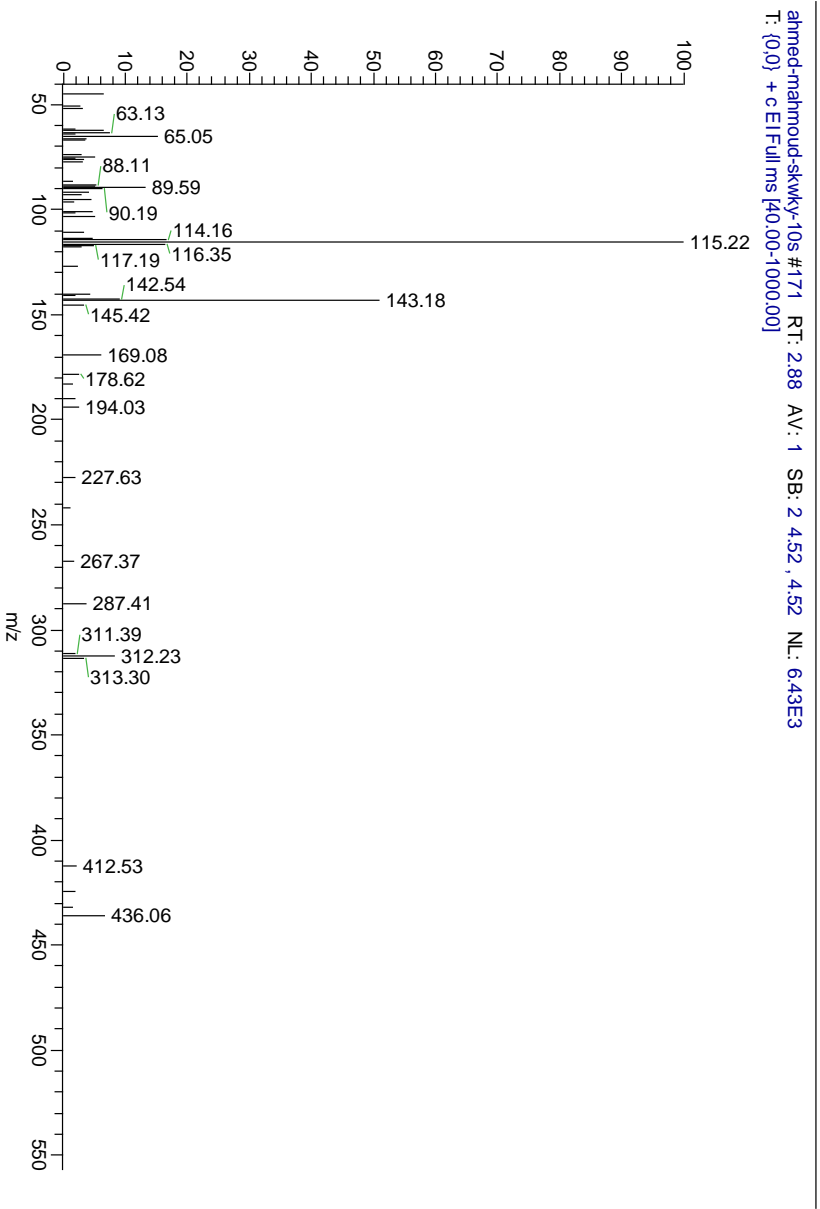

ahmed-mahmoud-skwy-10s #171 RT: 2.88 AV: 1 SB: 2 4.52, 4.52 NL: 643E3  
T: (0.0) + c E I Full ms [40.00-1000.00]

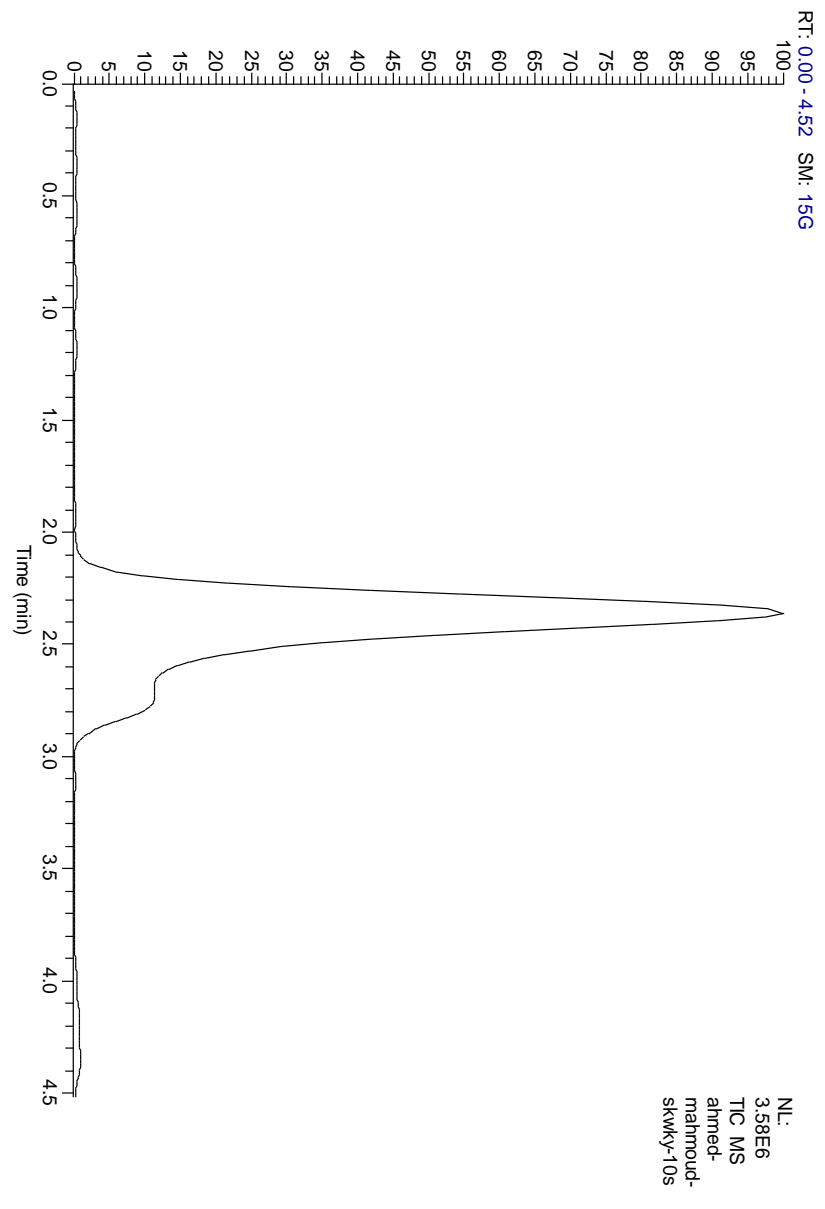

RT: 0.00 - 4.52 SM: 15G  
C:\Xcalibur\... \ahmed-mahmoud-skwy-10s  
04-Aug-19 1:43:58 PM  
THE  
AZH  
OGY AND BIOTECHNOLOGY  
NL:  
3.58E6  
TIC MS  
ahmed-  
mahmoud-  
skwy-10s

**Figure S133. Mass spectrum of compound 19b**

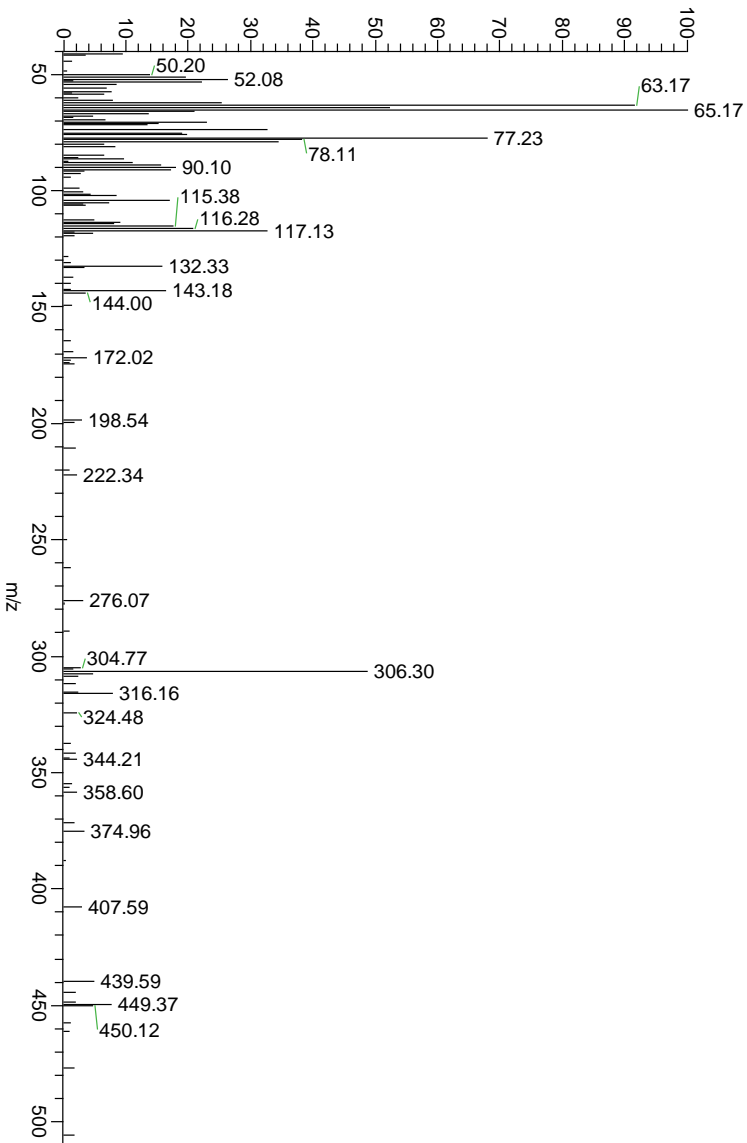

ahmed-nahmoud-skwy-11s #181 RT: 3.05 AV: 1 SB: 2.449, 4.49 NL: 1.05E4  
T: (0.0) + c EI Full ms [40.00-1000.00]

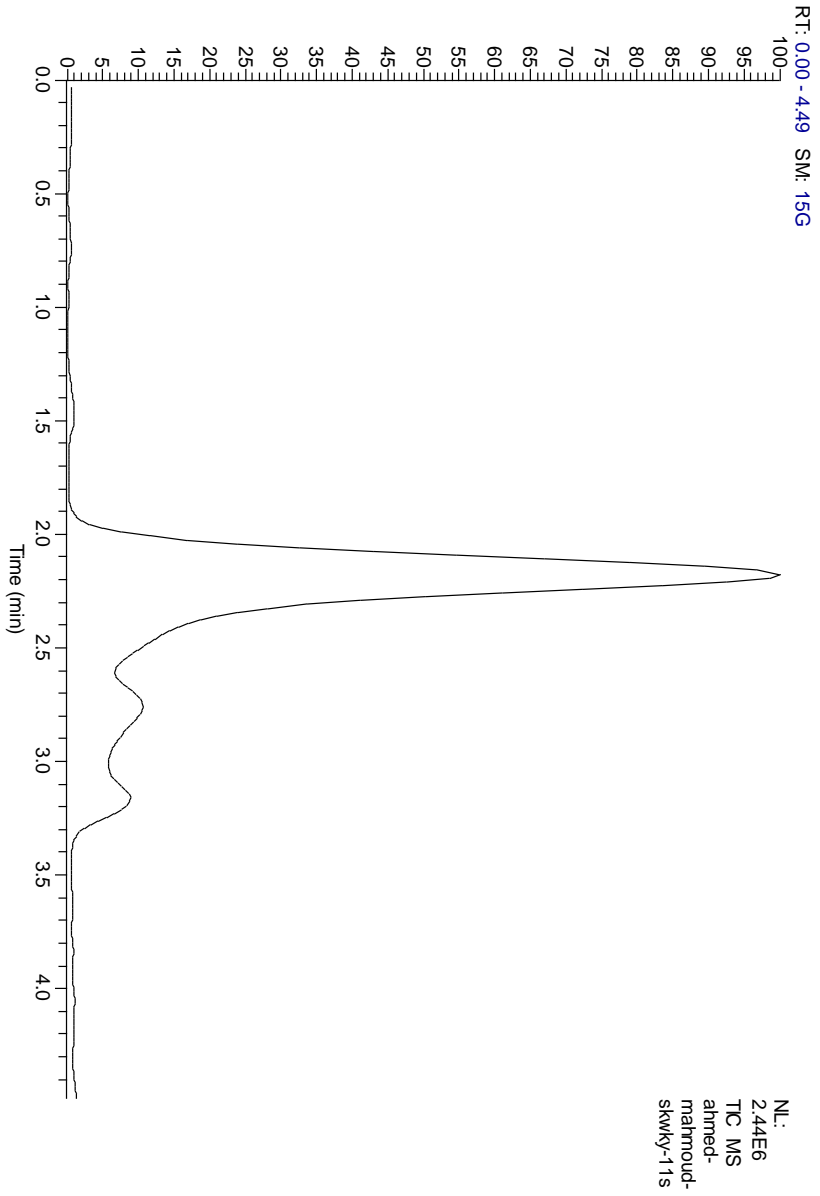

C:\Xcalibur\... \ahmed-nahmoud-skwy-11s

04-Aug-19 2:00:36 PM  
THE  
AZH

OGY AND BIOTECHNOLOGY

NL:  
2.44E6  
TIC MS  
ahmed-  
nahmoud-  
skwy-11s



**Figure S134. Mass spectrum of compound 19c**

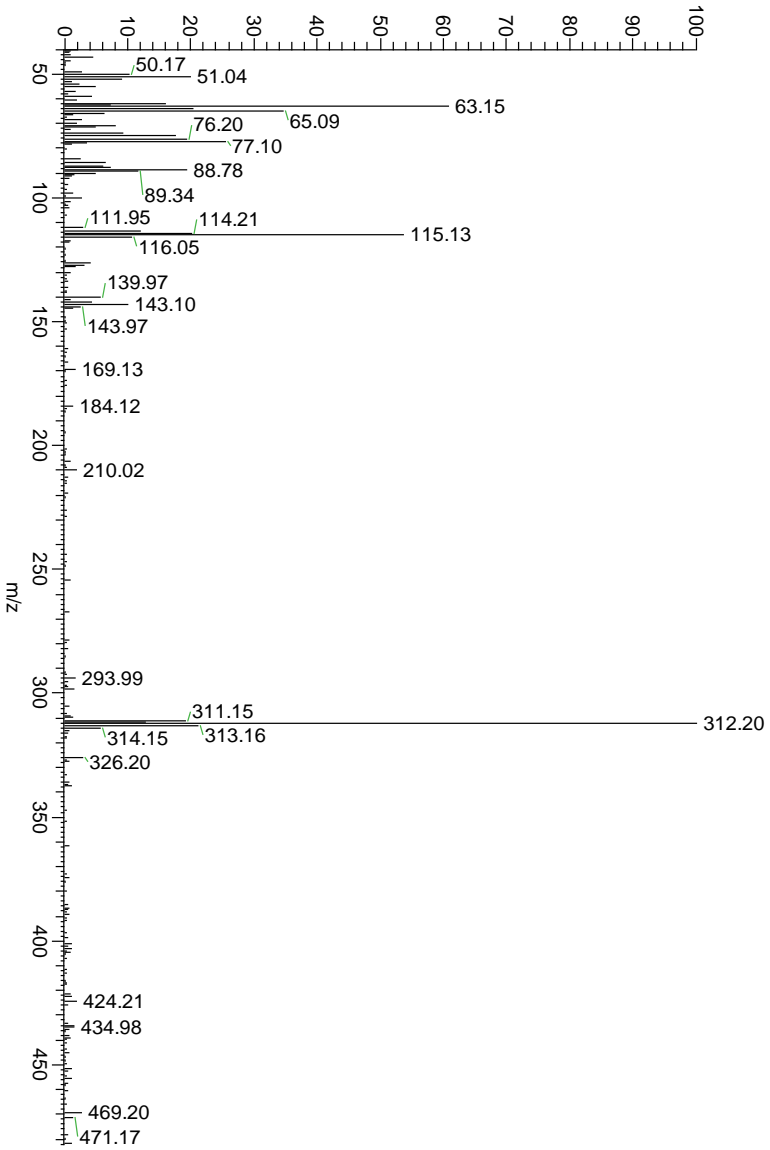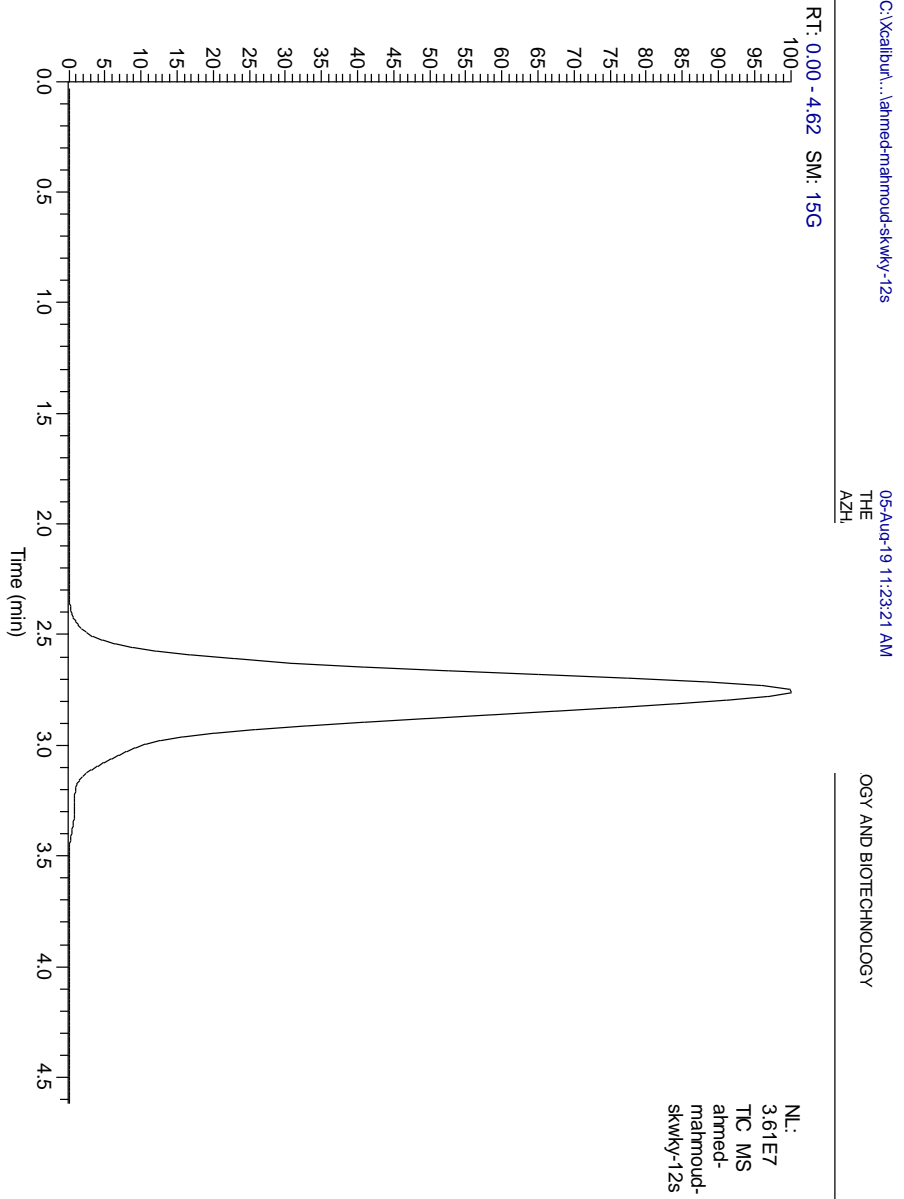

Figure S135. Mass spectrum of compound 20a

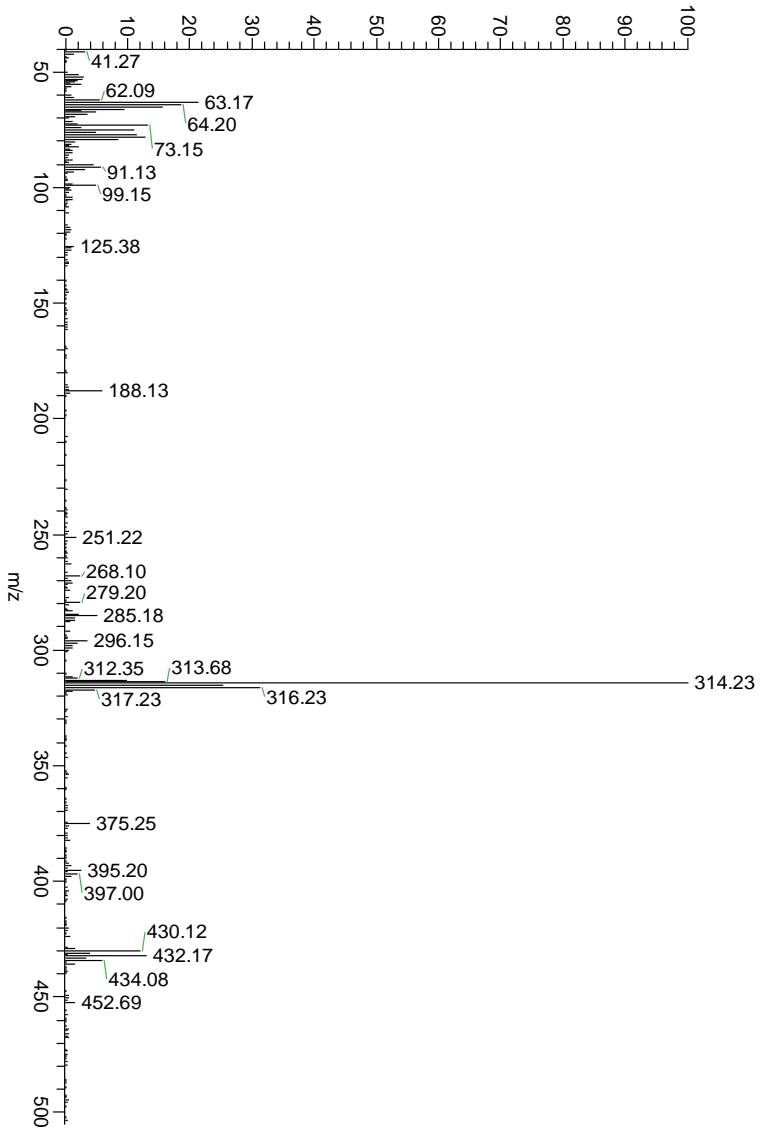

ahmed-mahmoud-shwki-17s #144 RT: 2.43 AV: 1 SB: 2 4.52 4.52 NL: 1.38E5  
T: (0.0) + c E I Full ms [40.00-1000.00]

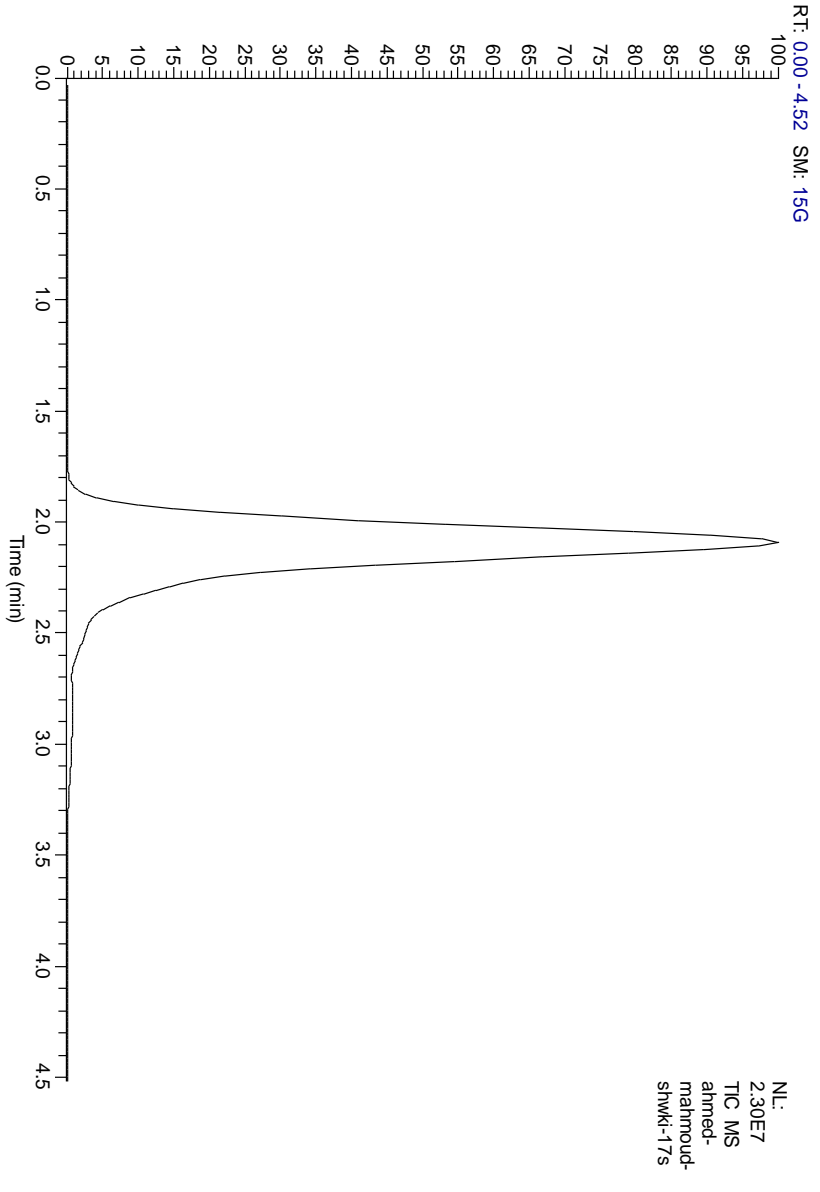

**Figure S136. Mass spectrum of compound 20b**

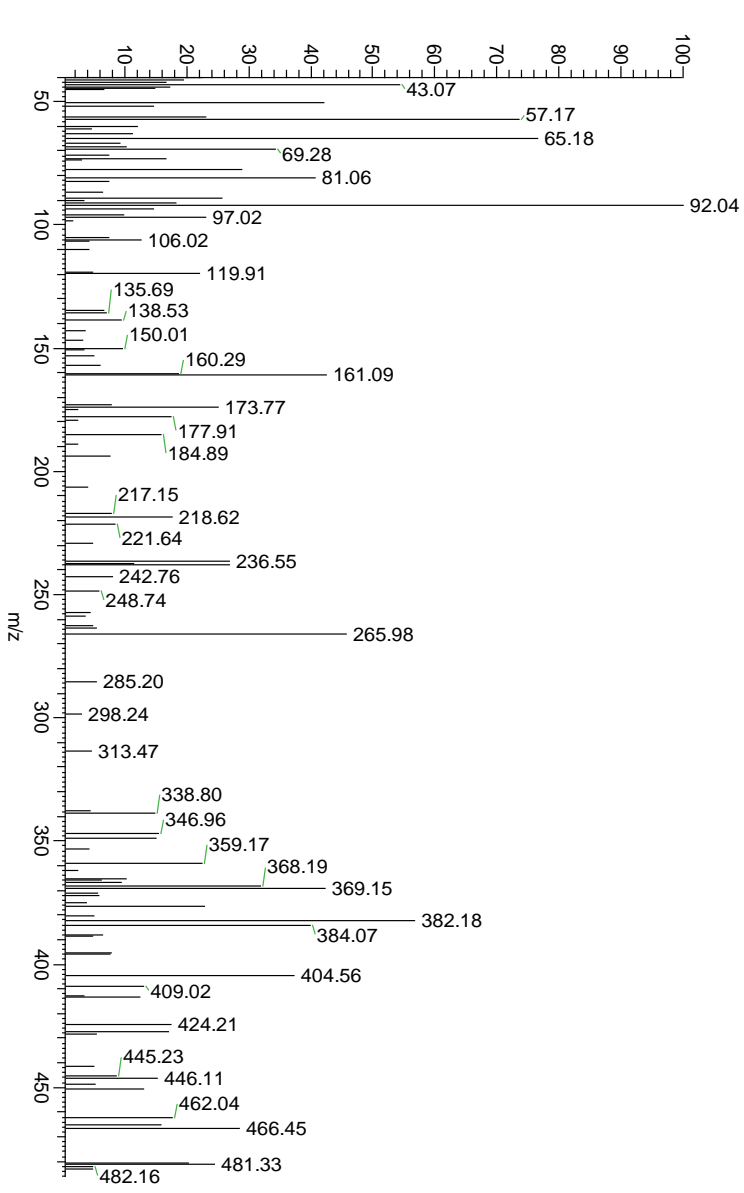

AHMED-MOHAMED-GODA-2e #268 RT: 4.50 AV: 1 NL: 2.29E3  
T: {0.0} + cEI Full ms [40.00-1000.00]

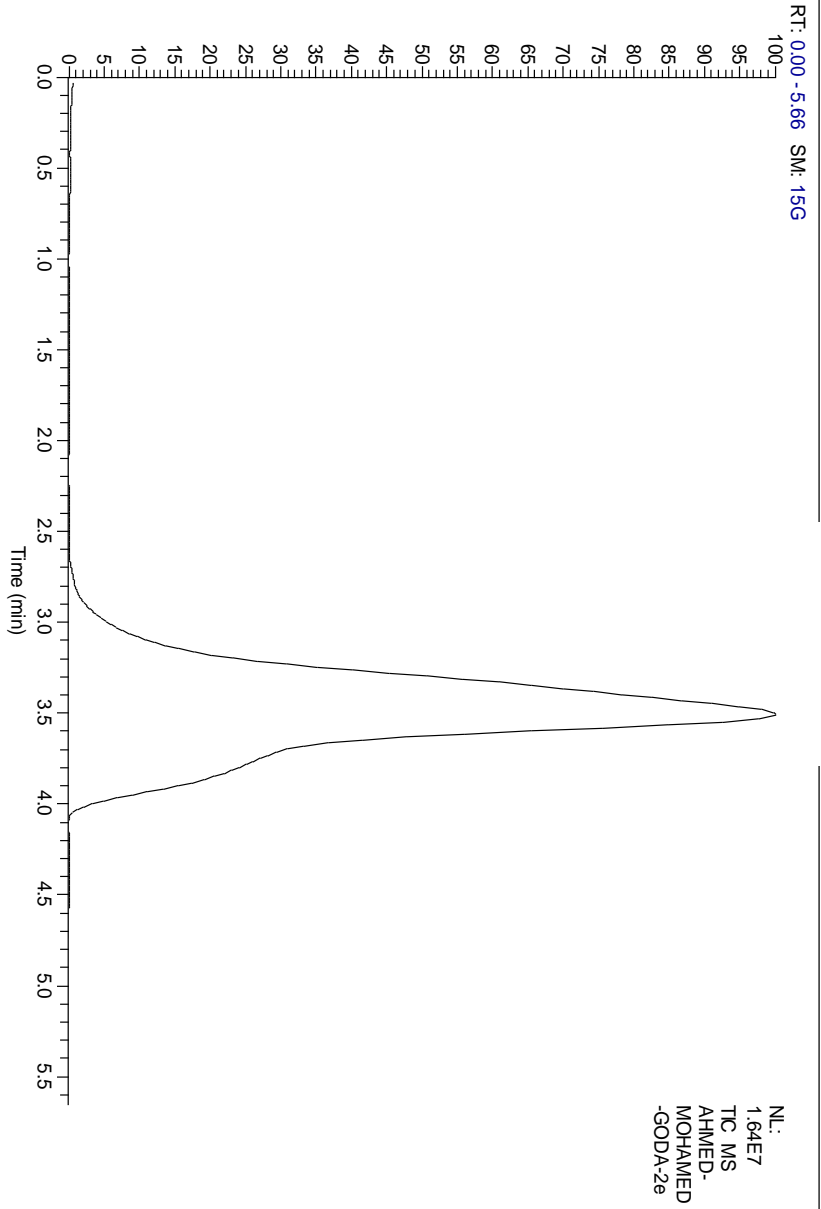

AL-AZHAR UNIVERSITY  
THE REGIONAL CENTER FOR MYCOLOGY & BIOTECHNOLOGY  
2/24/2017 7:50:07 PM  
AMED-GODA-2e  
NL: 1.64E7  
TIC MS  
AHMED-MOHAMED-GODA-2e

**Figure S137. Mass spectrum of compound 20b**

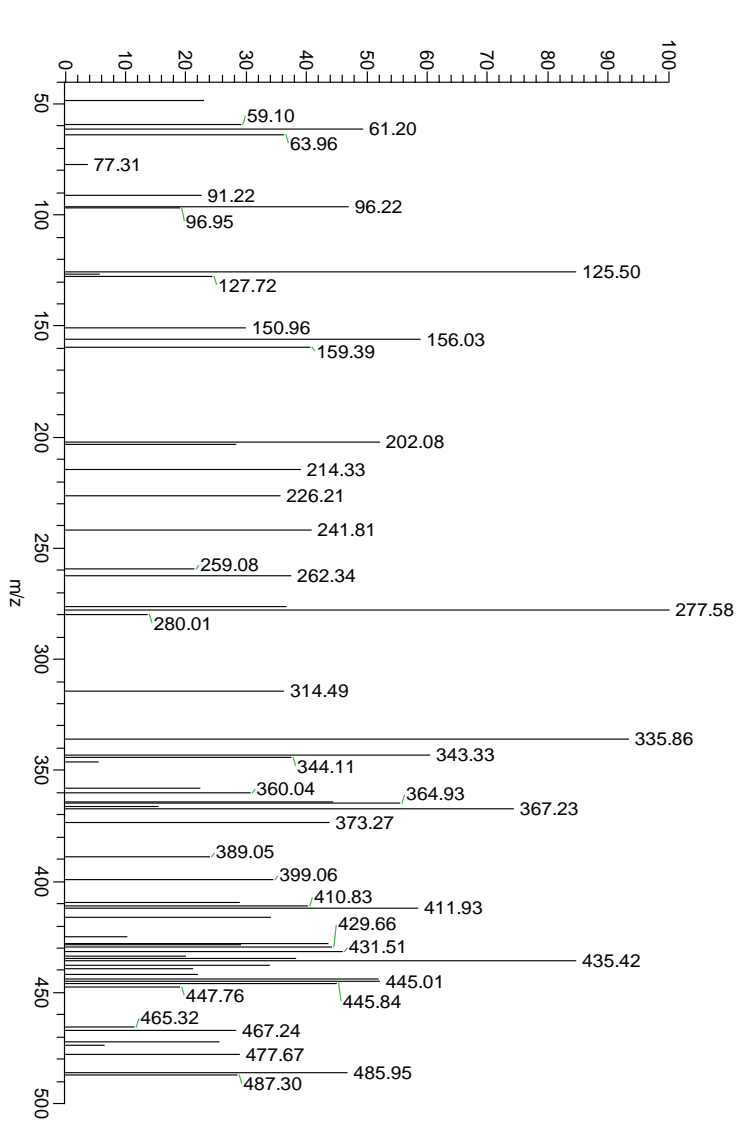

ahmed-mahmoud-shawky-15s\_190801124238 #223 RT: 3.75 AV: 1 SB: 2 4.55, 4.59 NL: 2.94E2  
T: {0.0} + c EI Full ms [40.00-1000.00]

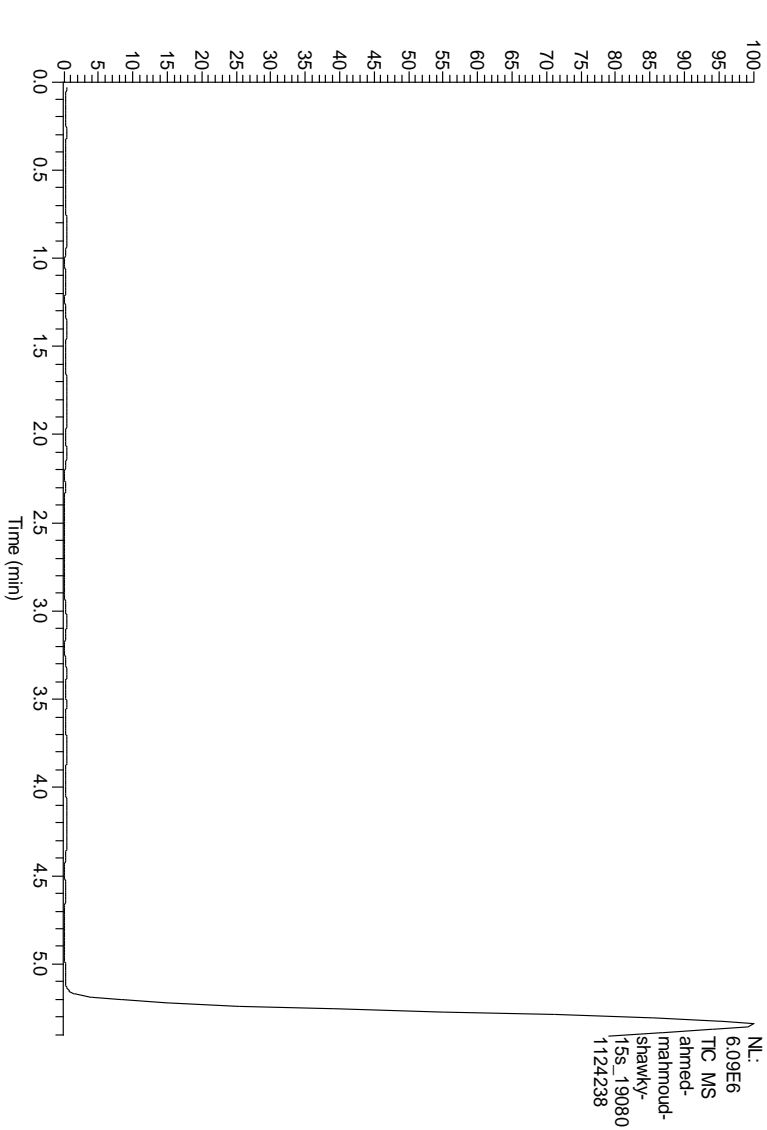

RT: 0.00 - 5.41 SM: 15G

01-Aug-19 12:42:38 PM  
THE  
AZH

OGY AND BIOTECHNOLOGY

NL:  
6.09E6  
TIC MS  
ahmed-  
mahmoud-  
shawky-  
15s\_19080  
1124238

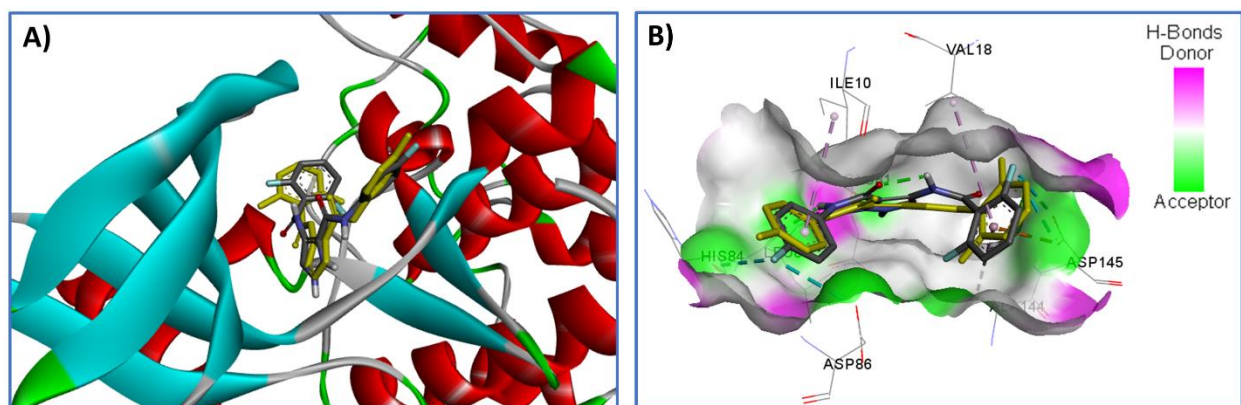

**Figure S138.** Binding modes/interactions of re-docked/bound LZ9 (compound **3**) into CDK-2 (pdb 2VTP): A) 3D binding mode of re-docked LZ9 (shown as sticks colored by element) into CDK-2 overlaid with the native ligand, LZ9 shown as yellow sticks; B) 3D binding mode of re-docked LZ9 (shown as sticks colored by element) overlaid with the native ligand (shown as yellow sticks) into CDK-2, the native ligand LZ9 shown as yellow sticks, receptor shown as hydrogen-bond surface, hydrogen atoms were omitted for clarity.

**Table S1.** Docking results of the new compounds into CDK-2 (pdb: 2VTP).

| Ligand     | $\Delta G_b^a$ | $K_i^b$   | HBs <sup>c</sup> | Atoms in H-bonding |            | Length <sup>d</sup><br>(Å) |
|------------|----------------|-----------|------------------|--------------------|------------|----------------------------|
|            |                |           |                  | In ligand          | In protein |                            |
| <b>16a</b> | -8.92          | 288.31 nM | 4                | CN                 | Thr14      | 2.17                       |
|            |                |           |                  | Urea NH            | Lys33      | 1.95                       |
|            |                |           |                  | Urea NH            | Asp145     | 1.78                       |
|            |                |           |                  | Urea NH            | Asp145     | 1.97                       |
| <b>16b</b> | -8.73          | 398.11 nM | 3                | Urea NH            | Asp86      | 2.04                       |
|            |                |           |                  | Urea NH            | Gln131     | 2.13                       |
|            |                |           |                  | CONH               | Asp145     | 2.10                       |
| <b>16c</b> | -8.60          | 500.18 nM | 4                | CN                 | Lys129     | 2.84                       |
|            |                |           |                  | CN                 | Gln131     | 2.36                       |
|            |                |           |                  | Urea NH            | Asn132     | 2.36                       |
|            |                |           |                  | Urea NH            | Asp145     | 1.84                       |
| <b>17a</b> | -9.84          | 60.97 nM  | 3                | CN                 | Thr14      | 2.10                       |
|            |                |           |                  | Urea CO            | Lys33      | 1.75                       |
|            |                |           |                  | Urea NH            | Asp145     | 2.05                       |
| <b>17b</b> | -9.65          | 85.09 nM  | 2                | Urea CO            | Leu83      | 1.92                       |
|            |                |           |                  | CONH               | Gln131     | 2.24                       |
| <b>17c</b> | -9.48          | 111.80 nM | 2                | CN                 | Leu83      | 2.09                       |
|            |                |           |                  | Urea NH            | Asp86      | 2.06                       |
| <b>18a</b> | -8.89          | 301.92 nM | 2                | CN                 | Leu83      | 1.91                       |
|            |                |           |                  | Urea NH            | Leu83      | 2.06                       |
| <b>18c</b> | -9.54          | 101.92 nM | 3                | Urea NH            | Leu83      | 2.27                       |
|            |                |           |                  | CN                 | Leu83      | 2.19                       |
|            |                |           |                  | CONH               | Gln131     | 2.15                       |
| <b>19b</b> | -10.41         | 23.47 nM  | 3                | CN                 | Leu83      | 2.17                       |
|            |                |           |                  | Urea NH            | Asp86      | 2.08                       |
|            |                |           |                  | CONH               | Gln131     | 2.81                       |
| <b>19c</b> | -10.67         | 15.06 nM  | 2                | Urea CO            | Lys33      | 2.34                       |
|            |                |           |                  | Urea NH            | Asp145     | 2.04                       |
| <b>20b</b> | -10.10         | 39.21 nM  | 4                | CN                 | Leu83      | 2.05                       |
|            |                |           |                  | Thiourea S         | Leu83      | 2.86                       |
|            |                |           |                  | Thiourea NH        | Asp86      | 3.06                       |
|            |                |           |                  | CONH               | Gln131     | 2.39                       |
| <b>20c</b> | -9.76          | 70.64 nM  | 2                | Urea NH            | Asp86      | 2.09                       |
|            |                |           |                  | CONH               | Gln131     | 1.96                       |

<sup>a</sup> Binding free energy (kcal/mol);<sup>b</sup> Inhibition constant (n/μM)<sup>c</sup> HBs, number of hydrogen bonds<sup>d</sup> length in angstrom (Å)

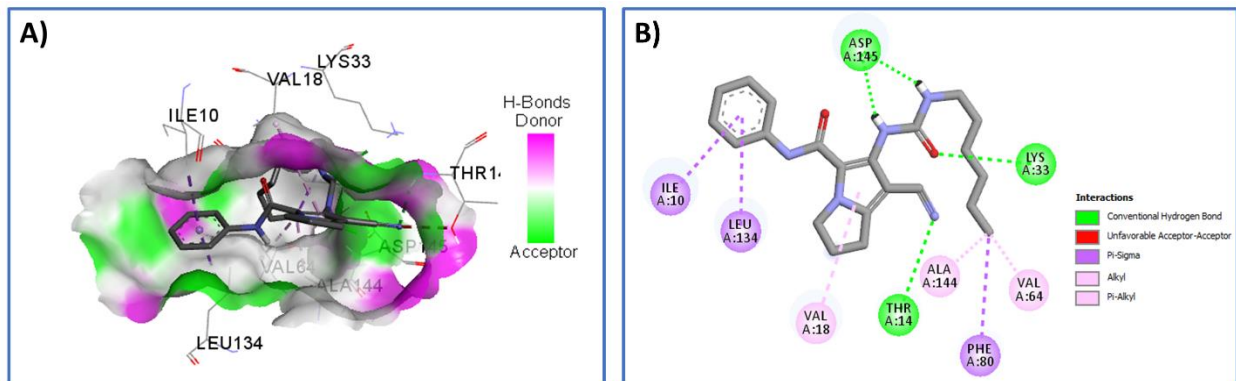

**Figure S139.** Binding modes/interactions of compound **16a** into CDK-2 (pdb: 2VTP): A) 3D binding mode of compound **16a** into the active site of CDK-2, receptor shown as hydrogen-bond surface, hydrogen atoms were omitted for clarity; B) 3D binding mode of compound **16a** into CDK-2 showing different types of hydrogen bonding and hydrophobic interactions.

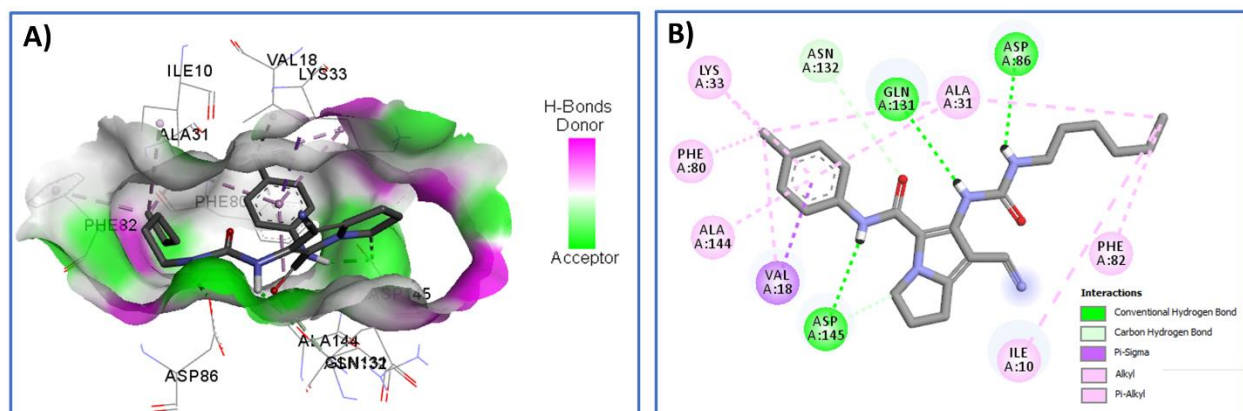

**Figure S140.** Binding modes/interactions of compound **16b** into CDK-2 (pdb: 2VTP): A) 3D binding mode of compound **16b** into the active site of CDK-2, receptor shown as hydrogen-bond surface, hydrogen atoms were omitted for clarity; B) 3D binding mode of compound **16b** into CDK-2 showing different types of hydrogen bonding and hydrophobic interactions.

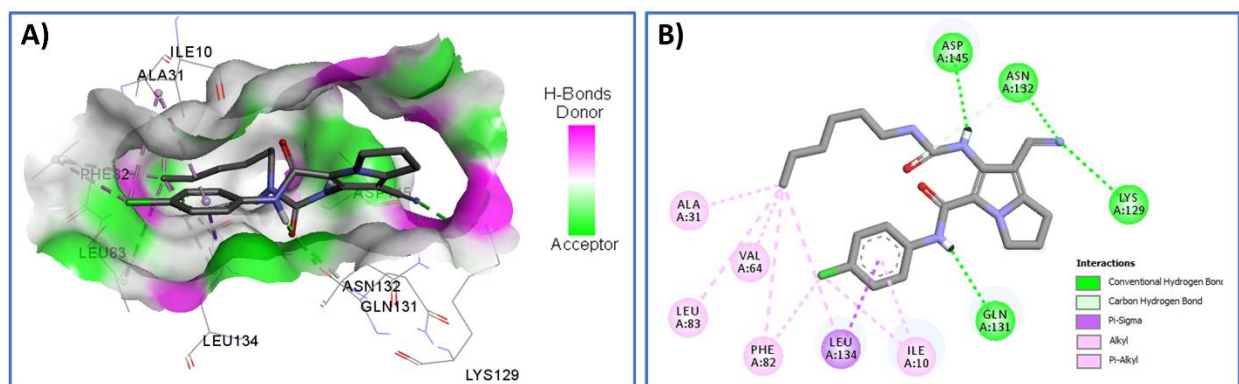

**Figure S141.** Binding modes/interactions of compound **16c** into CDK-2 (pdb: 2VTP): A) 3D binding mode of compound **16c** into the active site of CDK-2, receptor shown as hydrogen-bond surface, hydrogen atoms were omitted for clarity; B) 3D binding mode of compound **16c** into CDK-2 showing different types of hydrogen bonding and hydrophobic interactions.



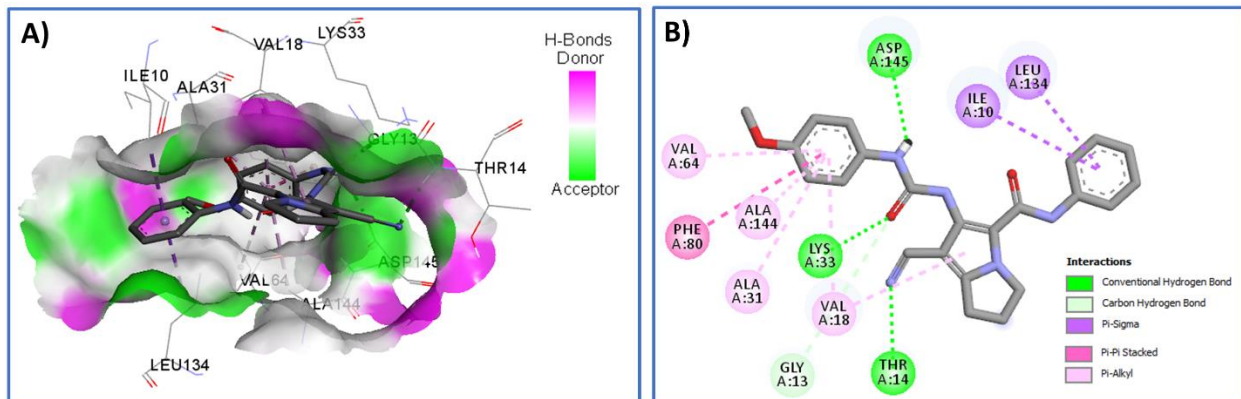

**Figure S142.** Binding modes/interactions of compound **17a** into CDK-2 (pdb: 2VTP): A) 3D binding mode of compound **17a** into the active site of CDK-2, receptor shown as hydrogen-bond surface, hydrogen atoms were omitted for clarity; B) 3D binding mode of compound **17a** into CDK-2 showing different types of hydrogen bonding and hydrophobic interactions.

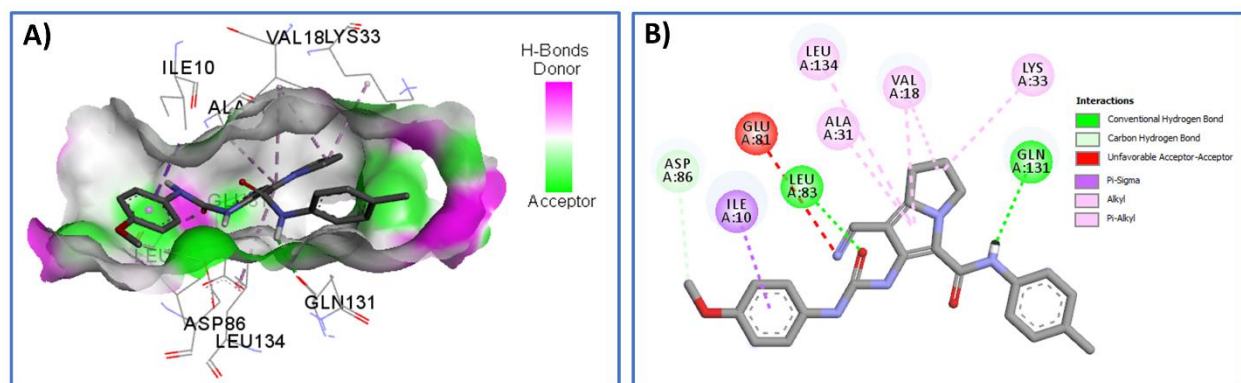

**Figure S143.** Binding modes/interactions of compound **17b** into CDK-2 (pdb: 2VTP): A) 3D binding mode of compound **17b** into the active site of CDK-2, receptor shown as hydrogen-bond surface, hydrogen atoms were omitted for clarity; B) 3D binding mode of compound **17b** into CDK-2 showing different types of hydrogen bonding and hydrophobic interactions.

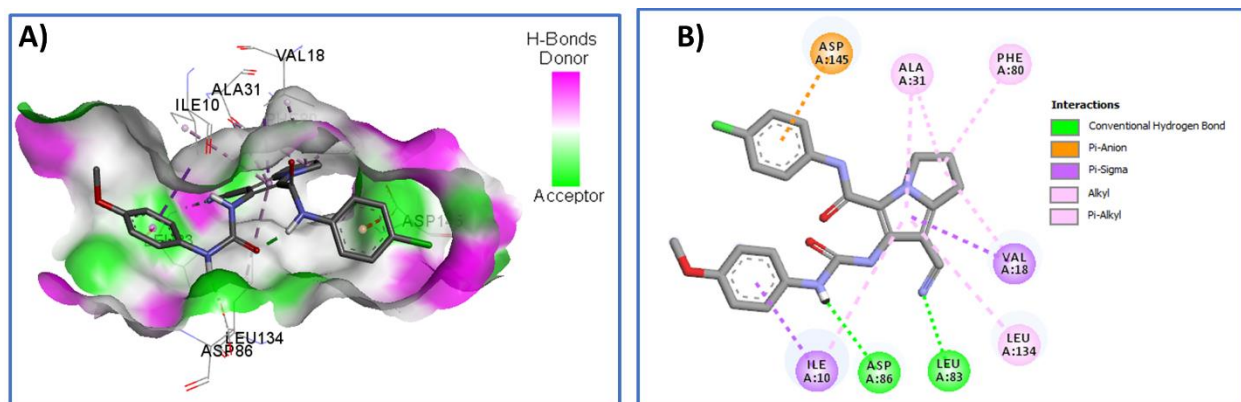

**Figure S144.** Binding modes/interactions of compound **17c** into CDK-2 (pdb: 2VTP): A) 3D binding mode of compound **17c** into the active site of CDK-2, receptor shown as hydrogen-bond surface, hydrogen atoms were omitted for clarity; B) 3D binding mode of compound **17c** into CDK-2 showing different types of hydrogen bonding and hydrophobic interactions.



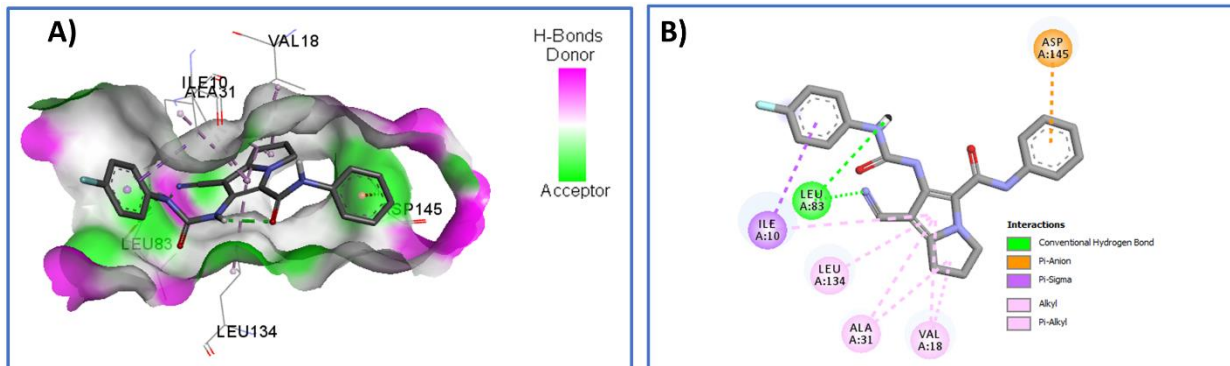

**Figure S145.** Binding modes/interactions of compound **18a** into CDK-2 (pdb: 2VTP): A) 3D binding mode of compound **18a** into the active site of CDK-2, receptor shown as hydrogen-bond surface, hydrogen atoms were omitted for clarity; B) 3D binding mode of compound **18a** into CDK-2 showing different types of hydrogen bonding and hydrophobic interactions.

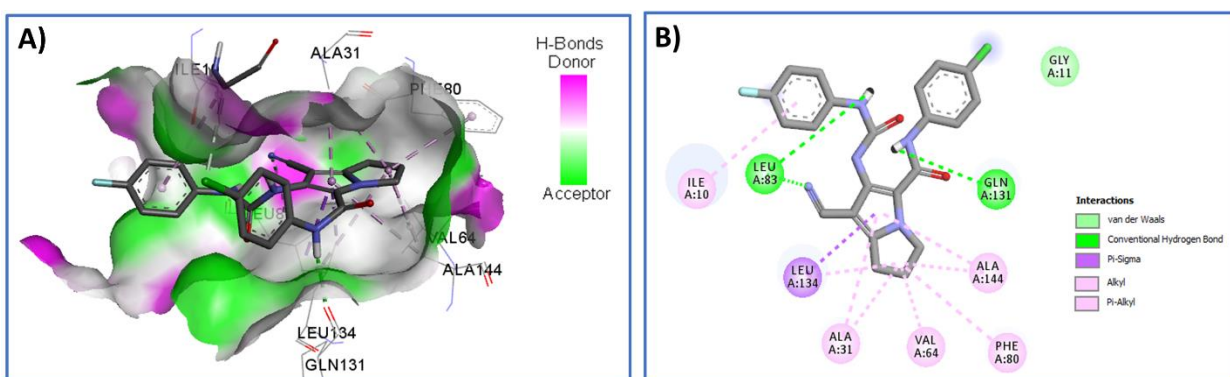

**Figure S146.** Binding modes/interactions of compound **18c** into CDK-2 (pdb: 2VTP): A) 3D binding mode of compound **18c** into the active site of CDK-2, receptor shown as hydrogen-bond surface, hydrogen atoms were omitted for clarity; B) 3D binding mode of compound **18c** into CDK-2 showing different types of hydrogen bonding and hydrophobic interactions.

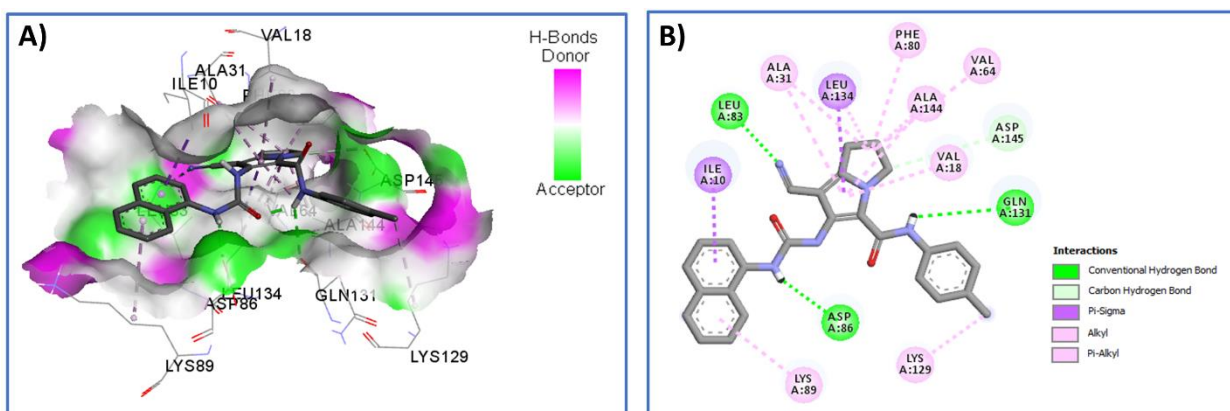

**Figure S147.** Binding modes/interactions of compound **19b** into CDK-2 (pdb: 2VTP): A) 3D binding mode of compound **19b** into the active site of CDK-2, receptor shown as hydrogen-bond surface, hydrogen atoms were omitted for clarity; B) 3D binding mode of compound **19b** into CDK-2 showing different types of hydrogen bonding and hydrophobic interactions.

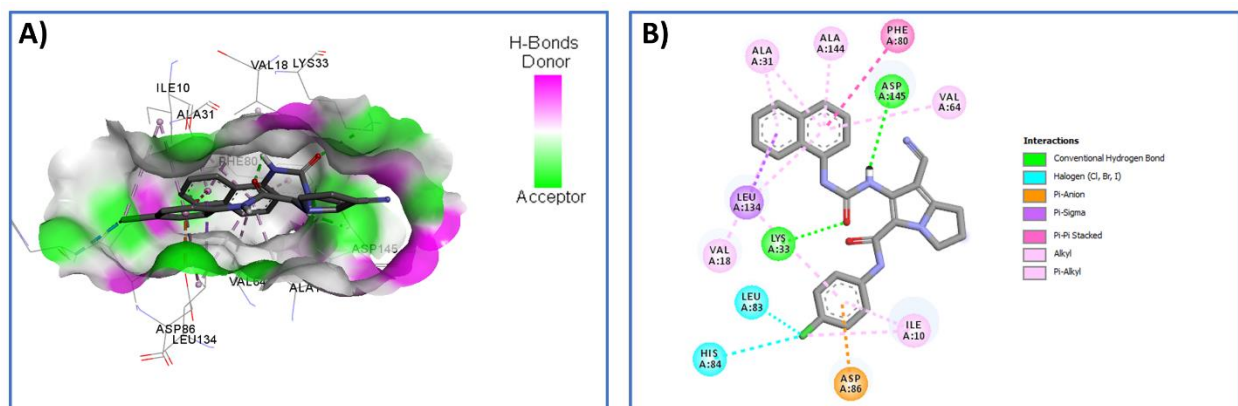

**Figure S148.** Binding modes/interactions of compound **19c** into CDK-2 (pdb: 2VTP): A) 3D binding mode of compound **19c** into the active site of CDK-2, receptor shown as hydrogen-bond surface, hydrogen atoms were omitted for clarity; B) 3D binding mode of compound **19c** into CDK-2 showing different types of hydrogen bonding and hydrophobic interactions.

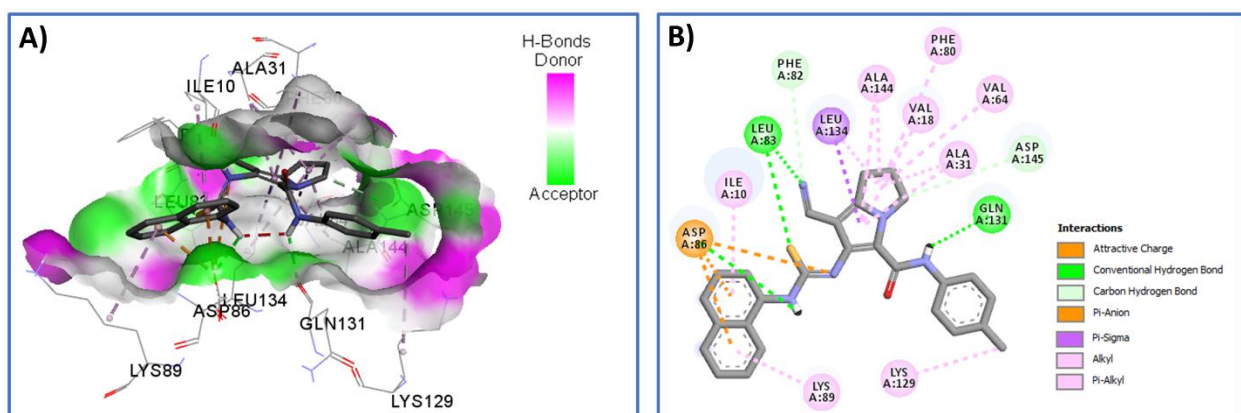

**Figure S149.** Binding modes/interactions of compound **20b** into CDK-2 (pdb: 2VTP): A) 3D binding mode of compound **20b** into the active site of CDK-2, receptor shown as hydrogen-bond surface, hydrogen atoms were omitted for clarity; B) 3D binding mode of compound **20b** into CDK-2 showing different types of hydrogen bonding and hydrophobic interactions.

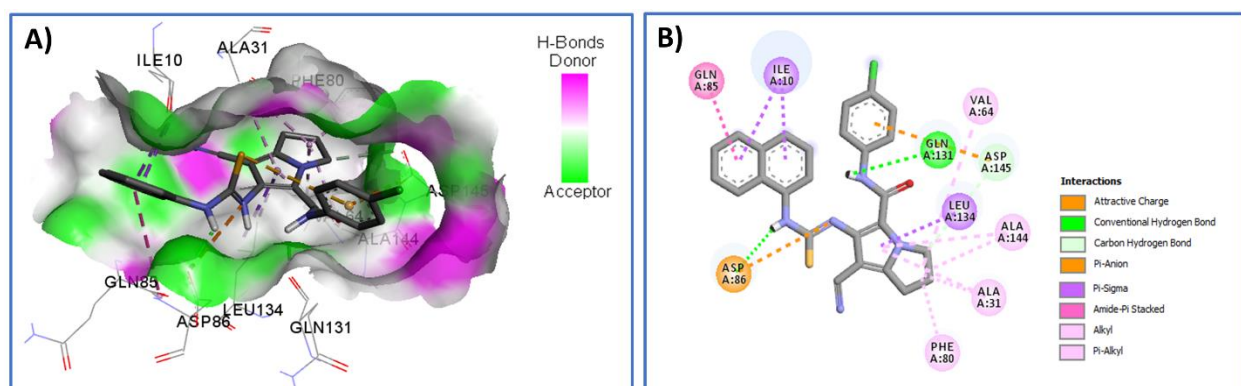

**Figure S150.** Binding modes/interactions of compound **20c** into CDK-2 (pdb: 2VTP): A) 3D binding mode of compound **20c** into the active site of CDK-2, receptor shown as hydrogen-bond surface, hydrogen atoms were omitted for clarity; B) 3D binding mode of compound **20c** into CDK-2 showing different types of hydrogen bonding and hydrophobic interactions.

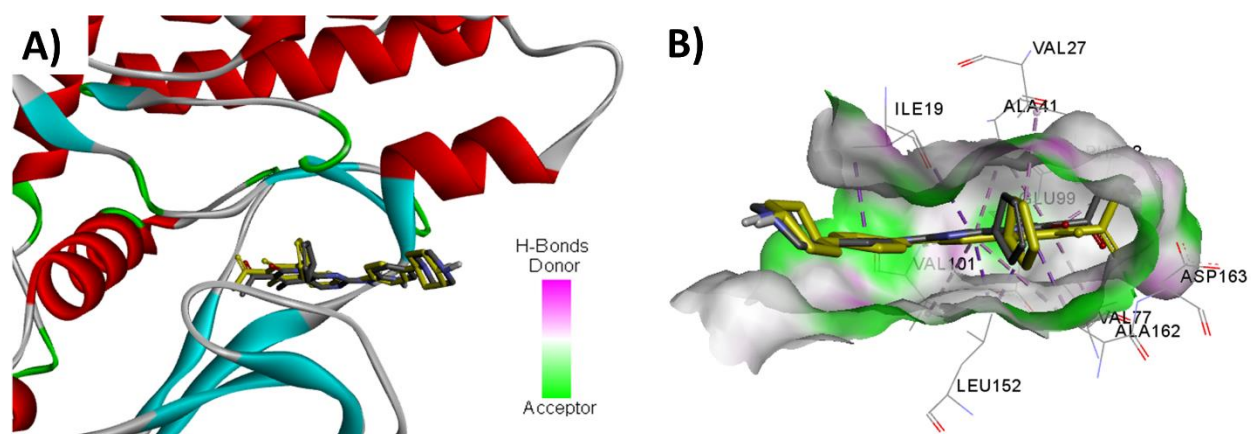

**Figure S151.** Binding modes/interactions of re-docked/bound palbociclib into CDK-6 (pdb 2EUF): A) 3D binding mode of re-docked palbociclib (shown as sticks colored by element) into CDK-6 overlaid with the native ligand (shown as yellow sticks); B) 3D binding mode of re-docked palbociclib (shown as sticks colored by element) overlaid with the native ligand (shown as yellow sticks) into CDK-6, the native ligand palbociclib shown as yellow sticks, receptor shown as hydrogen-bond surface, hydrogen atoms were omitted for clarity.

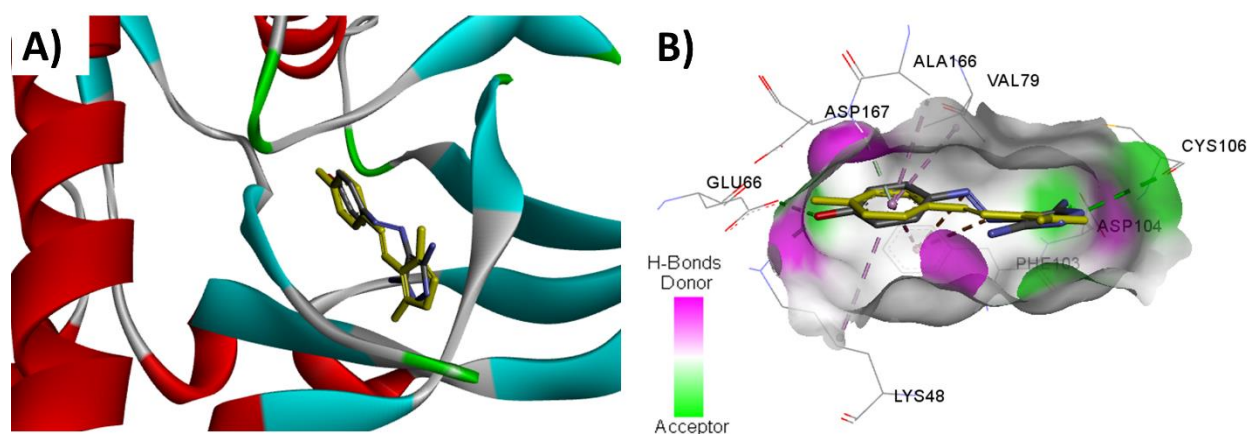

**Figure S152.** Binding modes/interactions of re-docked/bound palbociclib into CDK-9 (pdb 3TNH): A) 3D binding mode of re-docked CAN508 (shown as sticks colored by element) into CDK-9 overlaid with the native ligand (shown as yellow sticks); B) 3D binding mode of re-docked CAN508 (shown as sticks colored by element) overlaid with the native ligand (shown as yellow sticks) into CDK-9, the native ligand CAN508 shown as yellow sticks, receptor shown as hydrogen-bond surface, hydrogen atoms were omitted for clarity

**Table S2.** DLS figures and scores of compounds 9 and 16-20a-c.

| Comp.      |                                                                                     | DLS  | Comp.      |                                                                                      | DLS  |
|------------|-------------------------------------------------------------------------------------|------|------------|--------------------------------------------------------------------------------------|------|
| <b>16a</b> | 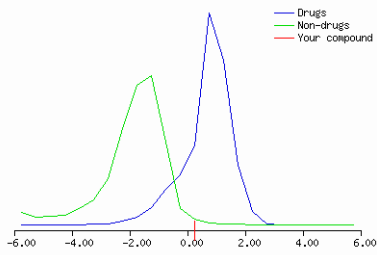   | 0.24 | <b>18c</b> |    | 0.86 |
| <b>16b</b> |    | 0.35 | <b>19a</b> |    | 0.14 |
| <b>16c</b> |   | 0.84 | <b>19b</b> |   | 0.30 |
| <b>17a</b> |  | 0.45 | <b>19c</b> |  | 0.71 |
| <b>17b</b> |  | 0.48 | <b>20a</b> |  | 0.11 |

|     |                                                                                                                                                                                                                                                                                                                                                                                                                                                               |      |     |                                                                                                                                                                                                                                                                                                                                                                                                                                                               |      |
|-----|---------------------------------------------------------------------------------------------------------------------------------------------------------------------------------------------------------------------------------------------------------------------------------------------------------------------------------------------------------------------------------------------------------------------------------------------------------------|------|-----|---------------------------------------------------------------------------------------------------------------------------------------------------------------------------------------------------------------------------------------------------------------------------------------------------------------------------------------------------------------------------------------------------------------------------------------------------------------|------|
| 17c | 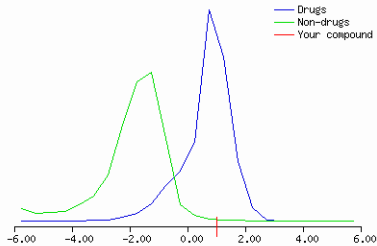 <p>Density plot for compound 17c. The x-axis ranges from -6.00 to 6.00. The 'Drugs' distribution (blue) is centered at approximately 1.0. The 'Non-drugs' distribution (green) is centered at approximately -1.5. The 'Your compound' distribution (red) is centered at approximately 0.5. The legend indicates: Drugs (blue), Non-drugs (green), Your compound (red).</p>  | 1.01 | 20b |  <p>Density plot for compound 20b. The x-axis ranges from -6.00 to 6.00. The 'Drugs' distribution (blue) is centered at approximately 1.0. The 'Non-drugs' distribution (green) is centered at approximately -1.5. The 'Your compound' distribution (red) is centered at approximately 0.5. The legend indicates: Drugs (blue), Non-drugs (green), Your compound (red).</p> | 0.28 |
| 18a |  <p>Density plot for compound 18a. The x-axis ranges from -6.00 to 6.00. The 'Drugs' distribution (blue) is centered at approximately 1.0. The 'Non-drugs' distribution (green) is centered at approximately -1.5. The 'Your compound' distribution (red) is centered at approximately 0.5. The legend indicates: Drugs (blue), Non-drugs (green), Your compound (red).</p>  | 0.65 | 20c |  <p>Density plot for compound 20c. The x-axis ranges from -6.00 to 6.00. The 'Drugs' distribution (blue) is centered at approximately 1.0. The 'Non-drugs' distribution (green) is centered at approximately -1.5. The 'Your compound' distribution (red) is centered at approximately 0.5. The legend indicates: Drugs (blue), Non-drugs (green), Your compound (red).</p> | 0.69 |
| 18b |  <p>Density plot for compound 18b. The x-axis ranges from -6.00 to 6.00. The 'Drugs' distribution (blue) is centered at approximately 1.0. The 'Non-drugs' distribution (green) is centered at approximately -1.5. The 'Your compound' distribution (red) is centered at approximately 0.5. The legend indicates: Drugs (blue), Non-drugs (green), Your compound (red).</p> | 0.71 | 9   |  <p>Density plot for compound 9. The x-axis ranges from -6.00 to 6.00. The 'Drugs' distribution (blue) is centered at approximately 1.0. The 'Non-drugs' distribution (green) is centered at approximately -1.5. The 'Your compound' distribution (red) is centered at approximately 0.5. The legend indicates: Drugs (blue), Non-drugs (green), Your compound (red).</p>  | 0.71 |

**Table S3.** The suitable physicochemical space for oral bioavailability and Boiled-Egg models of compounds **9** and **16-20a-c**.

| Comp.      | Physicochemical space | Boiled-Egg model |
|------------|-----------------------|------------------|
| <b>16a</b> |                       |                  |
| <b>16b</b> |                       |                  |
| <b>16c</b> |                       |                  |



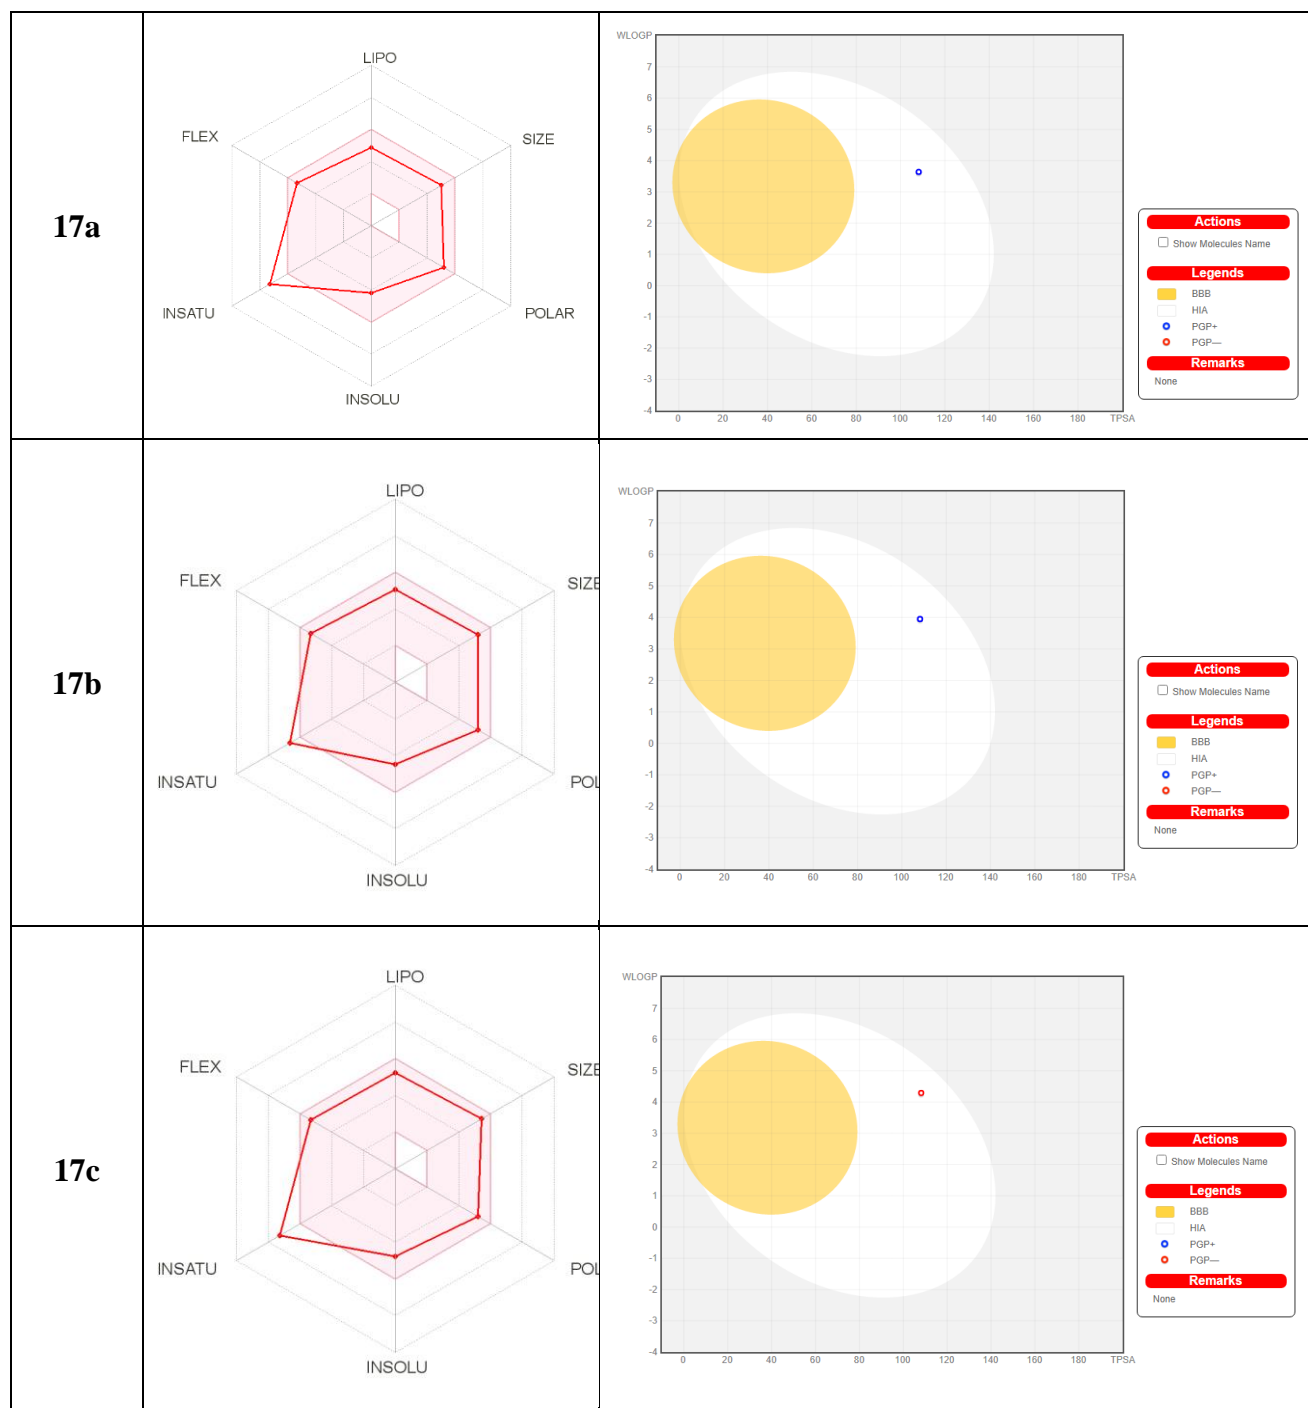

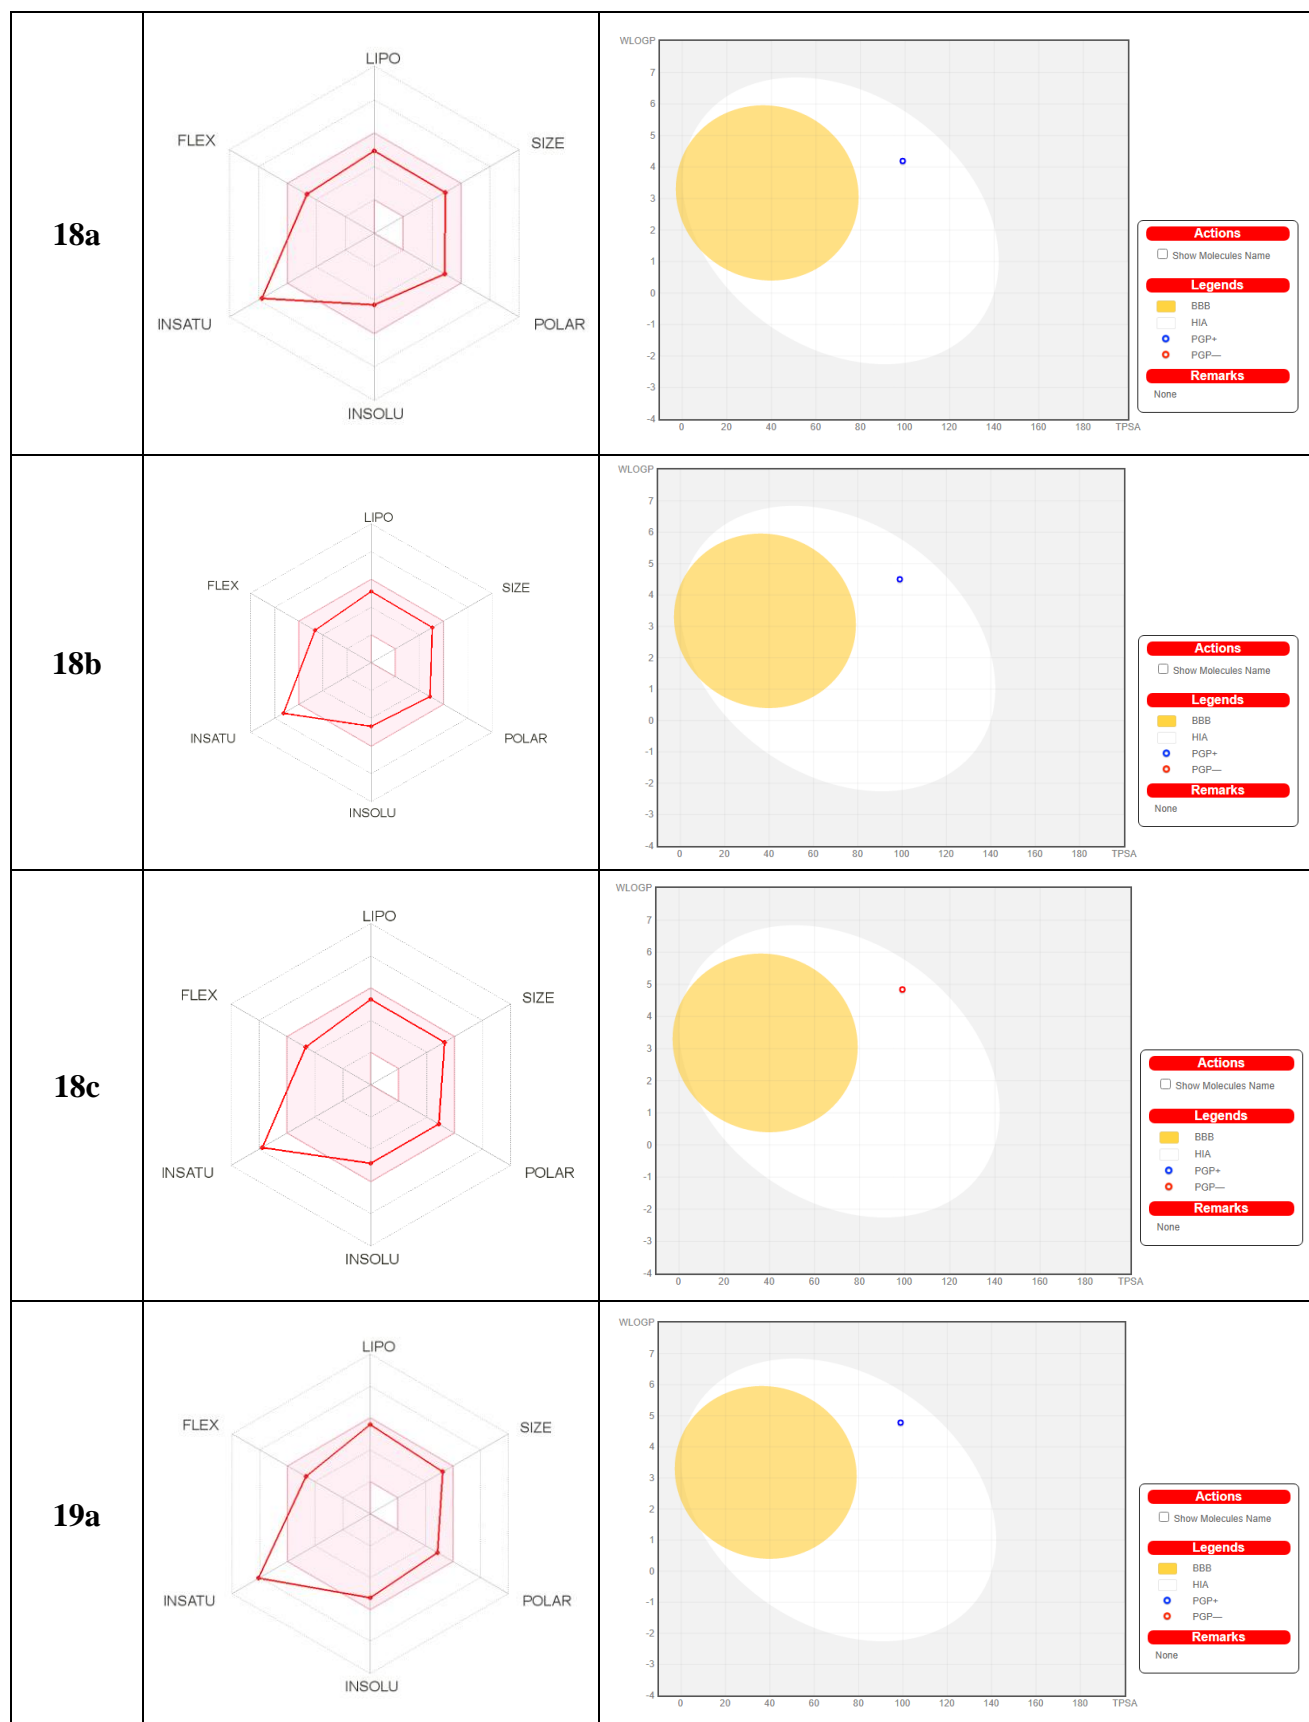



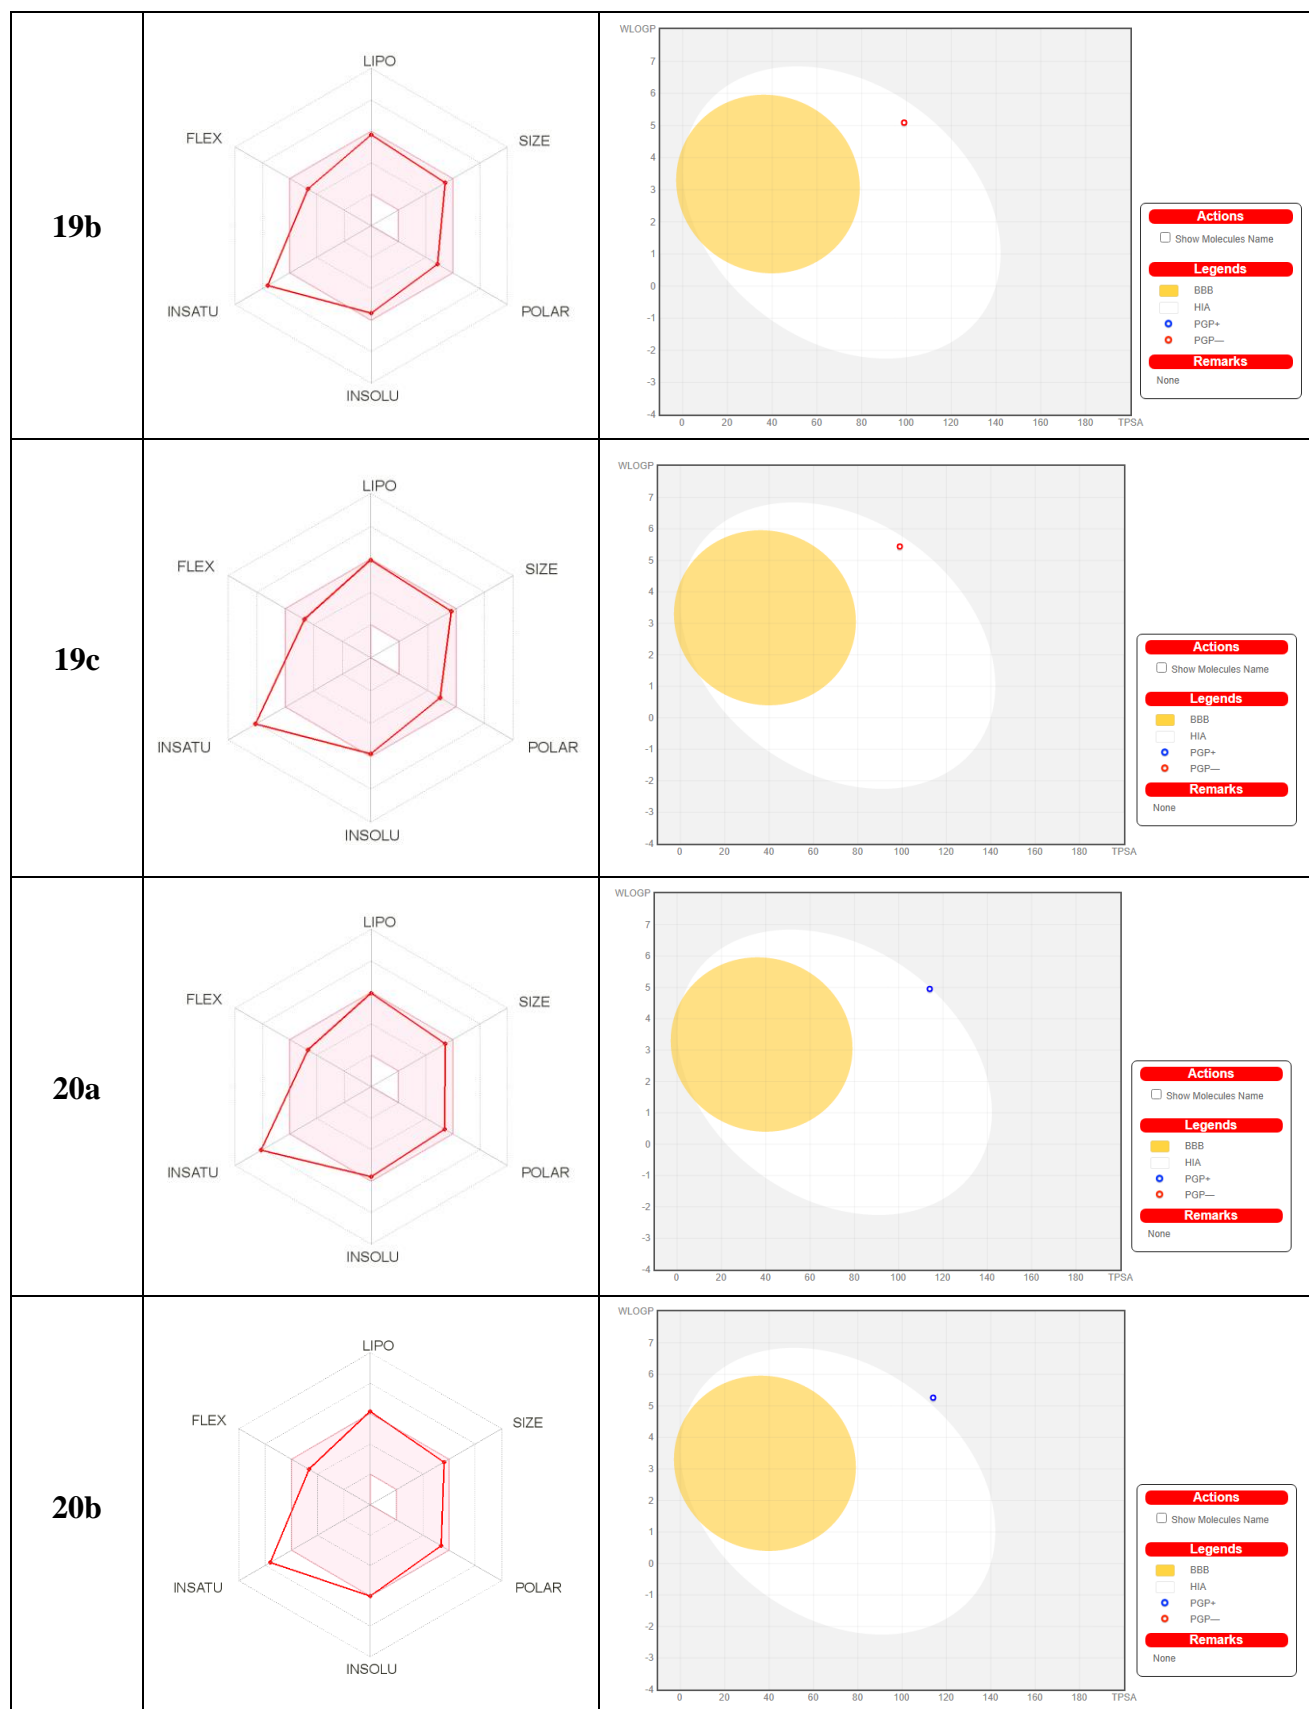

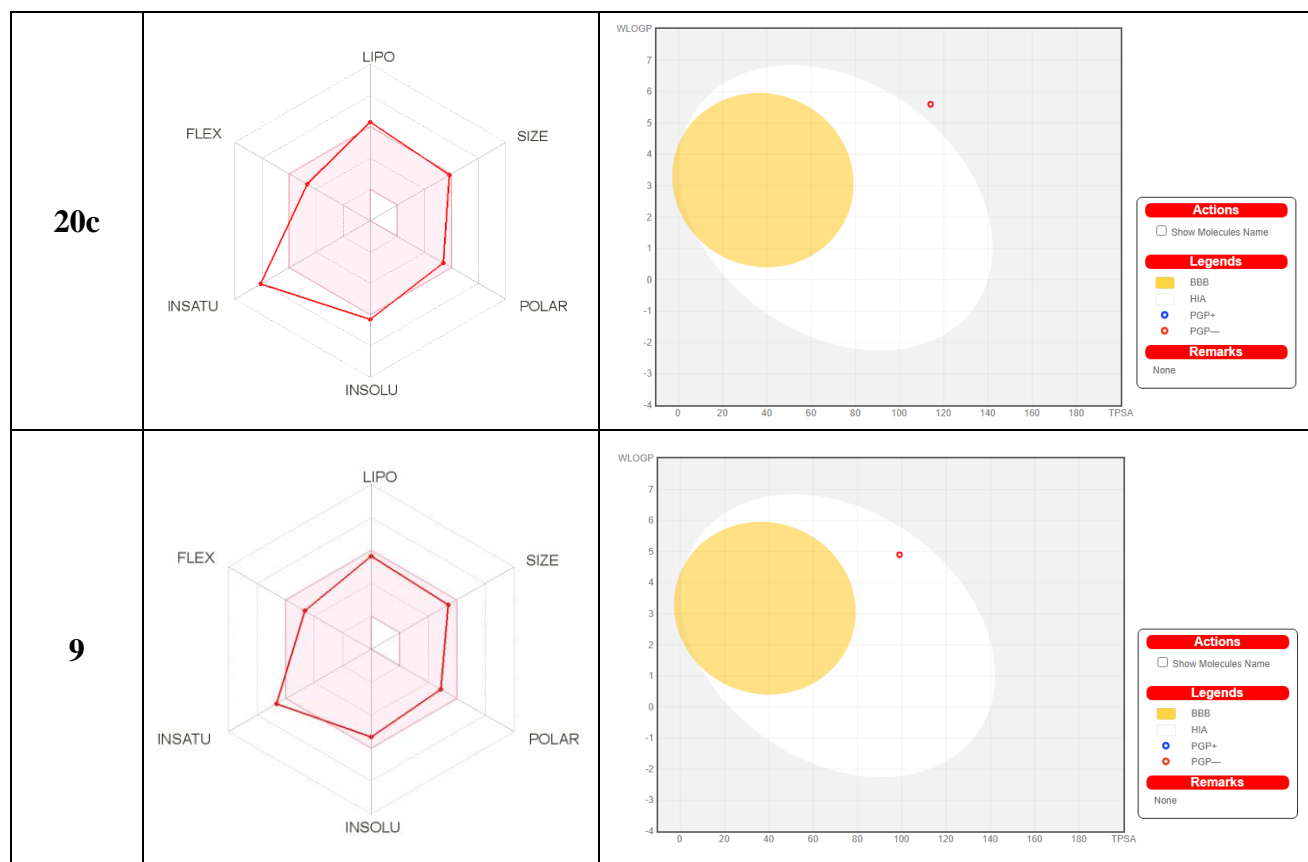

The suitable physicochemical space figures and BOILED-Egg's models were calculated using SwissADME (<http://www.swissadme.ch/>)

The colored zone is the suitable physicochemical space for oral bioavailability

- LIPO (lipophilicity) -0.7 to +5.0
- SIZE (MW), 150g/mol to 500g/mol
- POLAR (polarity):  $20 \text{ \AA}^2 < \text{TPSA} < 130 \text{ \AA}^2$ .
- INSOLU (insolubility):  $0 < \text{Log S (ESOL)} < 6$
- INSATU (insaturation):  $0.25 < \text{Fraction Csp3} < 1$
- Flex (flexibility):  $0 < \text{Num. rotatable bonds} < 9$

### BOILED-Egg's models

- Points located in BOILED-Egg's yolk are molecules predicted to passively permeate through the blood-brain barrier (BBB).
- Points located in BOILED-Egg's white are molecules predicted to passively absorbed by the GIT.
- Blue dots are for molecules predicted to be effluated from the CNS by P-glycoprotein.
- Red dots are for molecules predicted not to be effluated from the CNS by P-glycoprotein.
